# Supplementary material for: Novel Chiral Bis-Phosphoramides as Organocatalysts for Tetrachlorosilane-Mediated Reactions
Source: Molecules. 2017 Dec 8;22(12):2181. doi: 10.3390/molecules22122181 (PMC6149666; doi:10.3390/molecules22122181)

# Novel chiral bis-phosphoramides as organocatalysts for tetrachlorosilane-mediated reactions

Sergio Rossi,\* Marco Ziliani, Rita Annunziata and Maurizio Benaglia\*

Department of Chemistry, Università degli Studi di Milano, via Golgi 19 20133 Milan (IT)

## INDEX

|                                                                           |          |
|---------------------------------------------------------------------------|----------|
| 1. General information                                                    | pag S-2  |
| 2. General procedure A: synthesis of N-methyl-1-(nitrophenyl)methanamines | pag S-2  |
| 3. General procedure B: synthesis of biphenylnitroamines                  | pag S-3  |
| 4. General procedure C: synthesis of nitro-phosphoroamides                | pag S-5  |
| 4.1 Synthesis of cyano-phosphoroamide 4e                                  | pag S-8  |
| 5. General procedure D: synthesis of amino-phosphoroamides                | pag S-9  |
| 5.1 Synthesis of Phosphoroamide 5e                                        | pag S-11 |
| 6. General procedure E: synthesis of SAPAs                                | pag S-12 |
| 6.1. Synthesis of compound 7i                                             | pag S-17 |
| 7. General procedure F: synthesis of 3,5-bisubstituted pyridines          | pag S-18 |
| 8. General procedure G: synthesis of bis(N-methylamino)-pyridines         | pag S-19 |
| 9. General procedure H: synthesis of bisphosphoroamides 15a-b             | pag S-20 |
| 10. General procedure for allylation of aldehydes                         | pag S-23 |
| 11. NMR Studies                                                           | pag S-26 |
| 12. NMR Spectra                                                           | pag S-30 |

## 1. General Information

$^1\text{H}$ -NMR,  $^{13}\text{C}$ -NMR and  $^{29}\text{Si}$ -NMR spectra were recorded with instruments at 300 MHz (Bruker F300) or 500 MHz (Bruker ADVANCE 500 or 600). Proton chemical shifts are reported in ppm ( $\delta$ ) with the solvent reference relative to tetramethylsilane (TMS) employed as the internal standard ( $\text{CDCl}_3 = \delta$  7.26 ppm).  $^{13}\text{C}$  NMR spectra were recorded operating at 75 MHz, 125 MHz or 192.5 MHz, with complete proton decoupling. Carbon chemical shifts are reported in ppm ( $\delta$ ) relative to TMS with the respective solvent resonance as the internal standard ( $\text{CDCl}_3$ ,  $\delta$  = 77.0 ppm).  $^{29}\text{Si}$  NMR spectra were recorded operating at 99 MHz, chemical shifts are reported in ppm ( $\delta$ ) relative to TMS.  $^{31}\text{P}$  spectra were recorded at 121.4 or 202.4 MHz and were referenced to phosphoric acid ( $\text{H}_3\text{PO}_4$ ) at 0.0 ppm. HPLC analysis was performed on an Agilent Instrument Series 1100 or 1200 series on chiral stationary phase. Purification of the products was performed by column chromatography on silica gel (230–400 mesh ASTM, Merck).

All the solvents were used are commercially available ( $\geq 99\%$ , chromatographic grade, purchased from Sigma Aldrich) and stored under nitrogen over molecular sieves (bottles with crown cap). Reactions were monitored by analytical thin-layer chromatography (TLC) using silica gel 60  $\text{F}_{254}$  pre-coated glass plates and visualized using UV light.

Compounds **1**,<sup>[1]</sup> **6a**,<sup>[2]</sup> and **6b**<sup>[2]</sup> are all known and were synthesized according to literature procedures. **3e**, **3l**, **12a**, **12b** are commercially available and were used as received.

## 2. General procedure A: synthesis of N-methyl-1-(nitrophenyl)methanamines (**3a**), (**3b**), (**3c**)

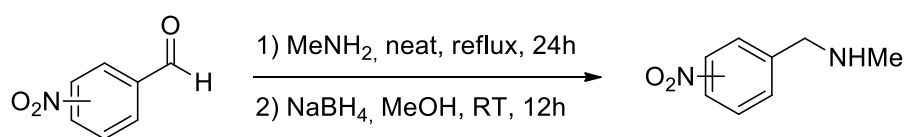

The desired nitro-substituted benzaldehyde (1 eq, 13.2 mmol, 2.0 g), methylamine (40% water solution, 1.1 eq, 14.5 mmol, 0.95 mL) and molecular sieves (3A, 100 mg) were introduced in a screw cap vial and the mixture was heated at 80°C for 24h. After cooling to RT, the mixture was diluted with chloroform (3 mL) and filtered. The solvent was removed by rotary evaporation and the crude obtained was redissolved in methanol (30 mL) and cooled to 0 °C.  $\text{NaBH}_4$  (1.1 eq, 14.5 mmol, 550 mg) was added in three portions and the resultant mixture allowed warming to RT and reacting for 24 h. The mixture was then quenched with aq.  $\text{NH}_4\text{OH}$  5% (10 mL) and the solvent was concentrated by rotary evaporation. The obtained aqueous layer was extracted with  $\text{CH}_2\text{Cl}_2$  (3 x 10 mL). The combined organic extracts were dried over  $\text{Na}_2\text{SO}_4$ , filtered and the filtrate was concentrated by rotary evaporation. The residue was purified by silica gel flash chromatography or distillation under vacuum to give the title compound.

*N*-methyl-1-(2-nitrophenyl)methanamine (**3a**)

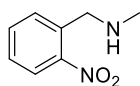

The crude mixture was purified by distillation under vacuum to yield the product as a yellow oil in 84% yield.

<sup>1</sup>H NMR (300 MHz; CDCl<sub>3</sub>): δ 7.92 (d, *J* = 8.2 Hz, 1H), 7.60-7.58 (m, 2H), 7.40 (t, *J* = 8.2 Hz, 1H), 3.98 (s, 2H), 2.44 (s, 3H), 1.74 (br, 1H).

*N*-methyl-1-(3-nitrophenyl)methanamine (**3b**)

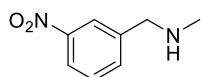

The crude mixture was purified by silica gel flash chromatography using CH<sub>2</sub>Cl<sub>2</sub>/MeOH (9:1, v:v) as eluent. The product was isolated as yellow oil in 86% yield.

<sup>1</sup>H NMR (300 MHz; CDCl<sub>3</sub>): δ 8.16 (s, 1H), 8.05 (d, *J* = 7.6 Hz, 1H), 7.65 (d, *J* = 7.6 Hz, 1H), 7.46 (t, *J* = 7.6 Hz, 1H), 3.84 (s, 2H), 2.45 (s, 3H), 2.04 (br, 1H).

*N*-methyl-1-(4-nitrophenyl)methanamine (**3c**)

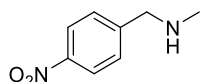

The crude product mixture purified by silica gel flash chromatography using Hex:AcOEt (1:1, v:v) as eluent. The product was isolated as yellow oil in 62% yield.

<sup>1</sup>H NMR (300 MHz; CDCl<sub>3</sub>): δ 8.18 (d, *J* = 8.7 Hz, 2H), 7.50 (d, *J* = 8.7 Hz, 2H), 3.86 (s, 2H), 2.46 (s, 3H), 1.56 (br, 1H).

**3. General procedure B: synthesis of biphenylnitroamines (3f), (3g), (3h):**

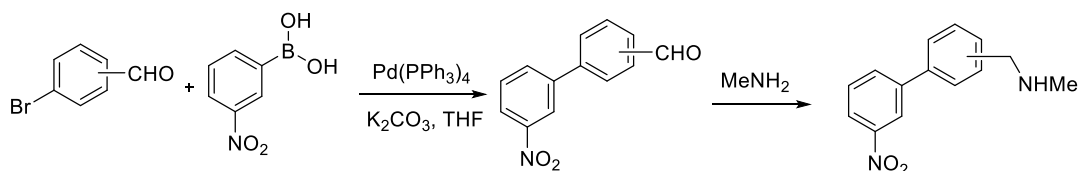

Pd(OAc)<sub>2</sub> (0.2 eq, 0.54 mmol, 122 mg) and PPh<sub>3</sub> (0.8 eq, 2.18 mmol, 572 mg) were suspended in dry THF (15 mL). After 15 min of stirring at RT, 3-nitrophenyl boronic acid (1.1 eq, 3 mmol, 500 mg), the desired bromobenzaldehyde (2 eq, 5.45 mmol, 1 g) and potassium carbonate (3 eq, 8.13 mmol, 1.12 g) were added. The mixture was heated under gently reflux for 18 h. After that, the mixture was cooled to RT, diluted with diethyl ether (30 mL) and washed with brine. The obtained aqueous layer was washed with diethyl ether (2 x 10 mL). The combined organic extracts were dried over Na<sub>2</sub>SO<sub>4</sub>, filtered and was concentrated by rotary evaporation.

The residue was purified by silica gel flash chromatography using hexane/ethyl acetate (8:2, v:v) as eluent, leading the desired products. The aldehydes were then converted to the corresponding amines **3f**, **3g**, **3h** according to the general procedure A.

3'-nitro-[1,1'-biphenyl]-2-carbaldehyde

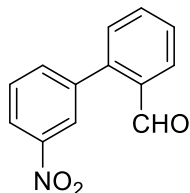

The crude product was purified by silica gel flash chromatography using hexane/ethyl acetate (8:2, v:v) as eluent. The product-containing fractions were combined and the solvent was removed by rotary evaporation to yield the product with 94% yield.

$^1\text{H}$  NMR (300 MHz;  $\text{CDCl}_3$ ):  $\delta$  9.97 (s, 1H), 8.37–8.22 (m, 2H), 8.06 (d,  $J$  = 7.7 Hz, 1H), 7.73–7.61 (m, 4H), 7.44 (d,  $J$  = 7.6 Hz, 1H).

3'-nitro-[1,1'-biphenyl]-3-carbaldehyde

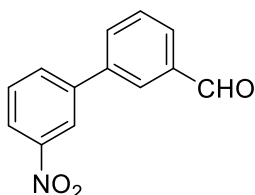

The crude product was purified by silica gel flash chromatography using hexane/ethyl acetate (8:2, v:v) as eluent. The product-containing fractions were combined and the solvent was removed by rotary evaporation to yield the product with 87% yield.

$^1\text{H}$  NMR (300 MHz;  $\text{CDCl}_3$ ):  $\delta$  10.13 (s, 1H), 8.50 (s, 1H), 8.27 (d,  $J$  = 8.3 Hz, 1H), 8.15 (s, 1H), 7.96 (t,  $J$  = 6.8 Hz, 1H), 7.91 (d,  $J$  = 7.8 Hz, 1H), 7.74–7.67 (m, 2H).

Compound (**3f**)

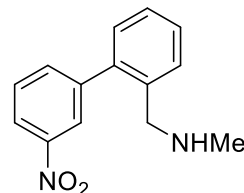

The residue was purified by silica gel flash chromatography using  $\text{CH}_2\text{Cl}_2/\text{MeOH}$  (9:1, v:v) as eluent. The product-containing fractions were combined and the solvent was removed by rotary evaporation under vacuum to yield the product in 31% yield.

$^1\text{H}$  NMR (300 MHz,  $\text{CDCl}_3$ ):  $\delta$  8.38 (s, 1H), 8.25 (d,  $J$  = 8.2 Hz, 1H), 7.80 (d,  $J$  = 7.7 Hz, 1H), 7.61 (t,  $J$  = 7.9 Hz, 1H), 7.54 (d,  $J$  = 7.4 Hz, 1H), 7.45 (dd,  $J$  = 7.3, 1.6 Hz, 1H), 7.41–7.37 (m, 2H), 7.29 (d,  $J$  = 7.0 Hz, 1H), 3.67 (s, 2H), 2.40 (s, 3H), 1.74 (br, 1H).

Compound (**3g**)

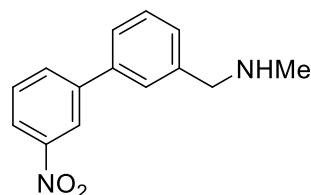

The residue was purified by silica gel flash chromatography using  $\text{CH}_2\text{Cl}_2/\text{MeOH}$  (9:1, v:v) as eluent. The product-containing fractions were combined and the solvent was removed by rotary evaporation under vacuum to yield the product in 66% yield.

$^1\text{H}$  NMR (300 MHz,  $\text{CDCl}_3$ ):  $\delta$  8.48 (s, 1H), 8.21 (d,  $J$  = 8.1 Hz, 1H), 7.95 (d,  $J$  = 7.7 Hz, 1H), 7.72–7.38 (m, 5H), 3.88 (s, 2H), 2.53 (s, 3H), 2.26 (br, 1H).

### 3'-nitro-[1,1'-biphenyl]-4-carbaldehyde

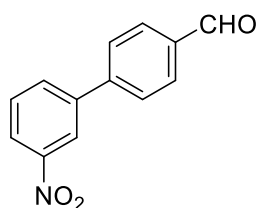

The crude product was purified by silica gel flash chromatography using hexane/ethyl acetate (8:2, v:v) as eluent. The product-containing fractions were combined and the solvent was removed by rotary evaporation to yield the product with 85% yield.

$^1\text{H}$  NMR (300 MHz;  $\text{CDCl}_3$ ):  $\delta$  10.13 (s, 1H), 8.53 (s, 1H), 8.31 (d,  $J$  = 8.2 Hz, 1H), 8.05 (d,  $J$  = 8.2 Hz, 2H), 7.99 (d,  $J$  = 7.8 Hz, 1H), 7.83 (d,  $J$  = 8.2 Hz, 2H), 7.70 (t,  $J$  = 8.0 Hz, 1H)

### Compound (3h)

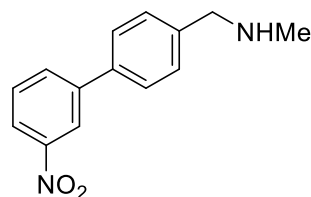

The residue was purified by silica gel flash chromatography using  $\text{CH}_2\text{Cl}_2/\text{MeOH}$  (9:1, v:v) as eluent. The product-containing fractions were combined and the solvent was removed by rotary evaporation under vacuum to yield the product in 60% yield.

$^1\text{H}$  NMR (300 MHz,  $\text{CDCl}_3$ ):  $\delta$  8.46 (s, 1H), 8.20 (d,  $J$  = 7.7 Hz, 1H), 7.93 (d,  $J$  = 7.7 Hz, 1H), 7.62 (d,  $J$  = 6.5 Hz, 2H), 7.49 (d,  $J$  = 6.5 Hz, 2H), 3.86 (s, 2H), 2.52 (s, 3H).

## 4. General procedure C: synthesis of nitro-phosphoroamides (4a), (4b), (4c), (4d), (4f), (4g), (4h) and (4l):

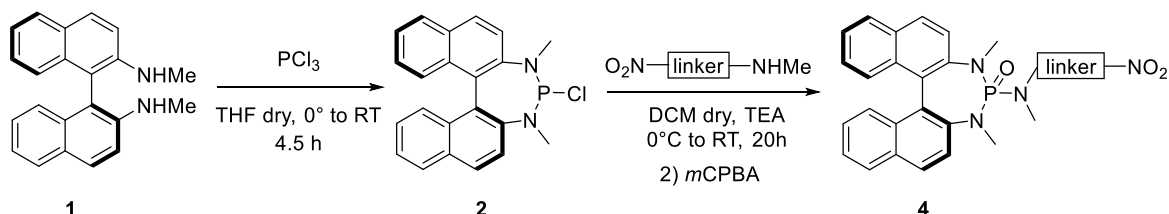

*N,N'*-dimethyl-1,1'-binaphthyl-2,2'-diamine (**1**) (1 eq, 3.20 mmol, 1.0 g) and  $\text{Et}_3\text{N}$  (3 eq, 9.6 mmol, 1.33 mL) were dissolved in dry THF (32 mL). The homogeneous mixture was cooled to 0 °C then  $\text{PCl}_3$  (3 eq, 9.60 mmol, 0.84 mL) was added dropwise via syringe whereupon a colorless precipitate formed immediately. The reaction mixture was stirred at 0 °C for 1.5 h, then was allowed to warm to room temperature and stirred for another 3 h. The volatiles were removed under high vacuum (room temperature, 0.5 mmHg) and  $\text{Et}_2\text{O}$  (30.0 mL) was added via syringe, then the mixture was stirred for 5 min. After that the supernatant was canula-filtered into another round bottom flask. The remaining precipitate in the reaction flask was washed again with  $\text{Et}_2\text{O}$  (30 mL) and filtered (2 times). The volatiles were removed under high vacuum (room temperature, 0.5 mmHg) to afford a light yellow solid. The solid was then dried for 12 h at reduced pressure (room temperature, 0.5 mmHg) to give a white solid foam (**2**). Dry  $\text{CH}_2\text{Cl}_2$  (40 mL) was added via syringe and the mixture was cooled to 0 °C. To this solution, a mixture of  $\text{Et}_3\text{N}$  (2 eq, 6.40 mmol, 0.98 mL) and the desired methylamine (**3**) (1.2 eq, 3.84 mmol) dissolved in dry  $\text{CH}_2\text{Cl}_2$  (4 mL) were added. The reaction mixture was

allowed to warm to room temperature and stirred for 20 h. A solution of *m*CPBA (70%) (1.5 eq, 4.80 mmol, 1.18 g) dissolved in 2 mL of THF was then added and the mixture was stirred for 20 h. After a quench with 15 mL of NH<sub>4</sub>Cl saturated aqueous solution, the phases were separated and aqueous layer was washed with CH<sub>2</sub>Cl<sub>2</sub> (10 mL). The combined organic extracts were washed with brine, dried over Na<sub>2</sub>SO<sub>4</sub>, filtered and concentrated by rotary evaporation. The crude residue was purified by silica gel flash chromatography using ethyl acetate (100%) as eluent to yield phosphoroamides with different yields.

#### Phosphoroamide **4a**

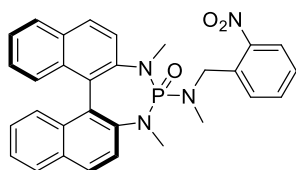

The product was obtained starting from *N*-methyl-1-(2-nitrophenyl)methanamine **3a** in 62% yield.

<sup>1</sup>H NMR (300 MHz; CDCl<sub>3</sub>): δ 8.00-7.82 (m, 8H), 7.51-7.07 (m, 8H), 4.63 63 (dd, *J* = 17.1, 8.1 Hz, 1H), 4.41 (dd, *J* = 17.2, 9.7 Hz, 1H), 3.11 (d, *J* = 10.3 Hz, 3H), 3.04 (d, *J* = 8.8 Hz, 3H), 2.33 (d, *J* = 8.9 Hz, 3H).

<sup>31</sup>P NMR (121.4 MHz; CDCl<sub>3</sub>): δ 29.21.

MS (ESI<sup>-</sup>): calculated for C<sub>30</sub>H<sub>27</sub>N<sub>4</sub>O<sub>3</sub>P = 522.18 Found *m/z* = 545.71 [M + Na]<sup>-</sup>.

#### Phosphoroamide **4b**

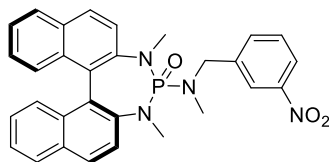

The product was obtained starting from *N*-methyl-1-(3-nitrophenyl)methanamine **3b** in 76% yield.

<sup>1</sup>H NMR (300 MHz; CDCl<sub>3</sub>): δ 8.34 (s, 1H), 8.20 (d, *J* = 8.1 Hz, 1H), 8.02 (d, *J* = 8.9 Hz, 1H), 7.89-7.85 (m, 3H), 7.78 (d, *J* = 8.0 Hz, 2H), 7.58-7.50 (m, 2H), 7.44-7.35 (m, 2H), 7.26-7.22 (m, 2H), 7.19-7.16 (m, 1H), 7.09 (d, *J* = 8.9 Hz, 1H), 4.62 (dd, *J* = 15.3, 7.5 Hz, 1H), 4.23 (dd, *J* = 15.3, 10.7 Hz, 1H), 3.13 (d, *J* = 2.5 Hz, 3H), 3.09 (d, *J* = 3.9 Hz, 3H), 2.18 (d, *J* = 8.7 Hz, 3H).

<sup>13</sup>C NMR (75 MHz; CDCl<sub>3</sub>) δ 148.5, 142.6, 141.3, 134.4, 132.6, 132.6, 132.5, 131.3, 129.8, 129.5, 129.4, 129.0, 128.1, 127.9, 127.4, 127.1, 126.3, 126.2, 125.4, 125.1, 123.4, 122.6, 122.4, 53.2, 36.2, 35.1, 34.5.

<sup>31</sup>P NMR (121.4 MHz; CDCl<sub>3</sub>): δ 28.76.

MS (ESI<sup>-</sup>): calculated for C<sub>30</sub>H<sub>27</sub>N<sub>4</sub>O<sub>3</sub>P = 522.53 Found *m/z* = 521.56 [M - 1]<sup>-</sup>.

#### Phosphoroamide **4c**

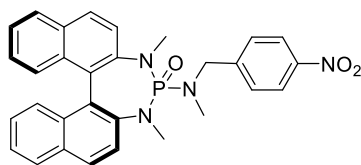

The product was obtained starting from *N*-methyl-1-(4-nitrophenyl)methanamine **3c** in 93% yield.

$^1\text{H}$  NMR (300 MHz;  $\text{CDCl}_3$ ):  $\delta$  8.24 (d,  $J$  = 8.4 Hz, 2H), 7.99 (d,  $J$  = 8.8 Hz, 1H), 7.87 (d,  $J$  = 8.6 Hz, 2H), 7.74 (d,  $J$  = 8.8 Hz, 2H), 7.58 (d,  $J$  = 8.4 Hz, 2H), 7.43-7.33 (m, 3H), 7.25-7.20 (m, 2H), 7.15 (t,  $J$  = 7.6 Hz, 1H), 7.05 (d,  $J$  = 8.6 Hz, 1H), 4.43 (dd,  $J$  = 15.3, 7.5 Hz, 1H), 4.26 (dd,  $J$  = 15.1, 10.3 Hz, 1H), 3.07 (d,  $J$  = 3.0 Hz, 3H), 3.04 (s, 3H), 2.17 (d,  $J$  = 8.7 Hz, 3H).

$^{13}\text{C}$  NMR (75 MHz,  $\text{CDCl}_3$ )  $\delta$  146.9, 146.0, 142.1, 140.8, 132.2, 132.1, 130.9, 130.8, 129.4, 128.8, 128.8, 127.6, 127.5, 127.4, 126.9, 126.6, 125.9, 125.7, 125.0, 124.6, 123.3, 122.8, 122.1, 52.8, 35.7, 34.5, 34.2.

$^{31}\text{P}$  NMR (121.4 MHz;  $\text{CDCl}_3$ ): 28.82

MS (ESI-): calculated for  $\text{C}_{30}\text{H}_{27}\text{N}_4\text{O}_3\text{P}$  = 522.18 Found  $m/z$  = 521.45  $[\text{M} - 1]^-$ .

#### Phosphoroamide **4f**

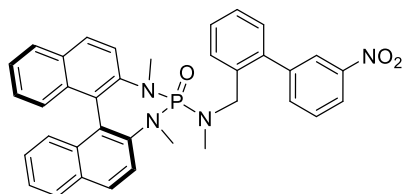

The product was obtained starting from amine **3e** in 87% yield.

$^1\text{H}$  NMR (300 MHz;  $\text{CDCl}_3$ ):  $\delta$  8.16 (d,  $J$  = 6.7 Hz, 1H), 8.04 (d,  $J$  = 7.2 Hz, 1H), 7.95-7.92 (m, 3H), 7.85-7.78 (m, 3H), 7.72 (d, 1H), 7.55-7.30 (m, 6H), 7.20 (m, 3H), 7.12 (t,  $J$  = 6.8 Hz, 1H), 7.02 (d,  $J$  = 8.6 Hz, 1H), 4.24 (dd,  $J$  = 15.2, 7.2 Hz, 1H), 4.03 (dd,  $J$  = 15.9, 9.2 Hz, 1H), 3.04 (t,  $J$  = 9.2 Hz), 2.18 (d,  $J$  = 9.0 Hz, 3H).

$^{31}\text{P}$  NMR (121.4 MHz;  $\text{CDCl}_3$ ): 29.34.

MS (ESI-Q-TOF): calculated for  $\text{C}_{36}\text{H}_{31}\text{N}_4\text{O}_3\text{P}$  : 598.21 Found  $m/z$  = 599.16  $[\text{M} + 1]^+$  and 621.13  $[\text{M} + \text{Na}]^+$

#### Phosphoroamide **4g**

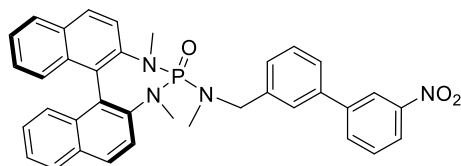

The product was obtained starting from amine **3g** in 62% yield.

$^1\text{H}$  NMR (300 MHz;  $\text{CDCl}_3$ ):  $\delta$  8.34 (s, 1H), 8.06 (d,  $J$  = 8.2 Hz, 1H), 7.85-7.71 (m, 5H), 7.73 (d,  $J$  = 8.6 Hz, 1H), 7.52-7.18 (m, 8H), 7.09 (m, 2H), 7.01 (t, 1H), 6.93 (d,  $J$  = 8.2 Hz, 1H), 4.30 (dd,  $J$  = 15.1, 7.0 Hz, 1H), 4.15 ( $J$  = 14.6, 10.7 Hz, 1H), 2.96 (dd,  $J$  = 9.6, 5.1 Hz, 6H), 2.10 (d,  $J$  = 8.8 Hz, 3H).

$^{31}\text{P}$  NMR (121.4 MHz;  $\text{CDCl}_3$ ): 29.16.

#### Phosphoroamide **4h**

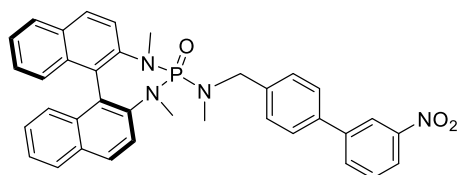

The product was obtained starting from amine **3h** in 45% yield.

$^1\text{H}$  NMR (300 MHz;  $\text{CDCl}_3$ ):  $\delta$  8.50 (s, 1H), 8.23 (d,  $J$  = 8.1 Hz, 1H), 8.06 (s, 1H), 7.98-7.86 (m, 5H), 7.80 (d,  $J$  = 8.8 Hz, 1H), 7.66-7.62 (m, 2H), 7.55-7.32 (m, 5H), 7.28-7.24 (m, 2H), 7.17 (t, 1H), 7.10 (d,  $J$  = 8.1 Hz, 1H), 4.45 (dd,  $J$  = 14.9, 7.3 Hz, 1H), 4.27 (dd,  $J$  = 14.9, 10.4 Hz, 1H), 3.12 (d,  $J$  = 10.3 Hz, 6H), 2.24 (d,  $J$  = 8.9 Hz, 3H).

$^{31}\text{P}$  NMR (121.4 MHz;  $\text{CDCl}_3$ ): 29.09.

#### Phosphoroamide **7l**

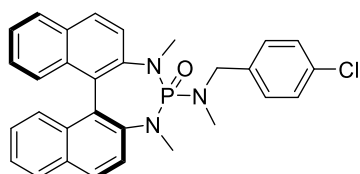

The product was obtained starting from amine **3l** in 31% yield.

$^1\text{H}$  NMR (300 MHz;  $\text{CDCl}_3$ ):  $\delta$  7.97 (d,  $J$  = 8.9 Hz, 2H), 7.86 (d,  $J$  = 8.8 Hz, 2H), 7.75 (d,  $J$  = 8.9 Hz, 2H), 7.42-7.34 (m, 5H), 7.26-7.20 (m, 3H), 7.13 (d,  $J$  = 7.2 Hz, 1H), 7.06 (d,  $J$  = 8.5 Hz, 1H), 4.31 (dd,  $J$  = 15.1, 7.6 Hz, 1H), 4.13 (dd,  $J$  = 14.9, 10.3 Hz, 1H), 3.06 (d,  $J$  = 1.7 Hz, 3H), 3.03 (d,  $J$  = 3.1 Hz, 3H), 2.16 (d,  $J$  = 9.0 Hz, 3H).

$^{31}\text{P}$  NMR (121.4 MHz;  $\text{CDCl}_3$ ): 29.06.

MS (ESI-Q-TOF): calculated for  $\text{C}_{30}\text{H}_{27}\text{ClN}_3\text{OP}$  = 511.16 Found  $m/z$  = 512.14  $[\text{M} + 1]^+$  and 534.11  $[\text{M} + \text{Na}]^+$

#### 4.1 Synthesis of cyano-phosphoroamide **4e**

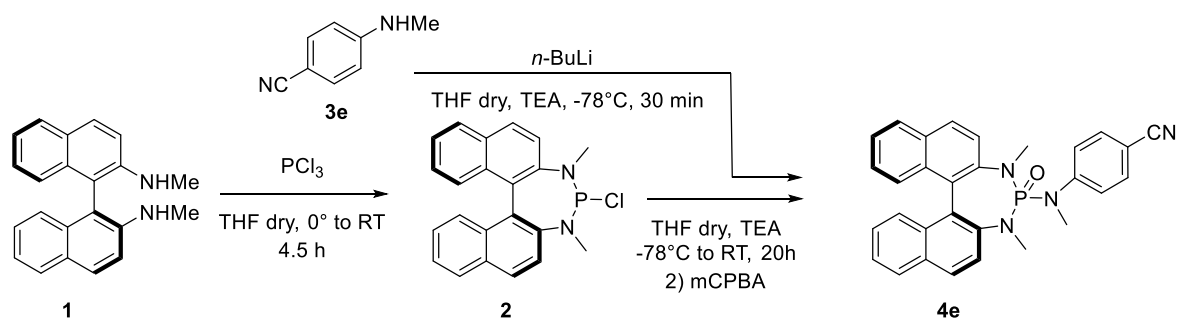

N,N'-dimethyl-1,1'-binaphthyl-2,2'-diamine (**1**) (1 eq, 0.96 mmol, 300 mg) and  $\text{Et}_3\text{N}$  (2.5 eq, 2.4 mmol, 0.34 mL) were dissolved in dry THF (21 mL). The homogeneous mixture was cooled to 0 °C then  $\text{PCl}_3$  (3 eq, 9.60

mmol, 0.84 mL) was added dropwise via syringe whereupon a colorless precipitate formed immediately. The reaction mixture was stirred at 0 °C for 1.5 h, then was allowed to warm to room temperature and stirred for another 3 h. The volatiles were removed under high vacuum (room temperature, 0.5mmHg) and Et<sub>2</sub>O (30.0 mL) was added via syringe, then the mixture was stirred for 5 min. After that the supernatant was canula-filtered into another round bottom flask. The remaining precipitate in the reaction flask was washed again with Et<sub>2</sub>O (5 mL) and filtered (3 times). The volatiles were removed under high vacuum (room temperature, 0.5 mmHg) to afford a light yellow solid. The solid was then dried for 12 h at reduced pressure (room temperature, 0.5 mmHg) to give a white solid foam (**2**). Dry CH<sub>2</sub>Cl<sub>2</sub> (40 mL) was added via syringe and the mixture was cooled to -78 °C with a dry ice-acetone bath. In a second round bottom flask, 4-(methylamino)benzonitrile **3e** (1.1 eq, 1.06 mmol, 139.6 mg) was dissolved in 10 mL of THF and cooled to -78 °C, then nBuLi 1.6 M (1.1 eq, 1.06 mmol, 0.66 mL), was slowly added. This solution was transfer in the round bottom flask containing (**3**) and the reaction mixture was allowed to warm to room temperature and then stirred for 20 h. *m*CPBA (70%) (1.5 eq, 1.44 mmol, 354 mg) dissolved in 2 mL of THF was then added and the mixture was stirred for 20 h. After a quench with 5 mL of NH<sub>4</sub>Cl saturated aqueous solution, the phases were separated and aqueous layer was washed with CH<sub>2</sub>Cl<sub>2</sub> (10 mL). The combined organic extracts were washed with brine, dried over Na<sub>2</sub>SO<sub>4</sub>, filtered and concentrated by rotary evaporation. The crude residue was purified by silica gel flash chromatography using ethyl acetate/hexane (9:1 v:v) as eluent.

The title compound was obtained in 48% yield.

<sup>1</sup>H NMR (300 MHz; CDCl<sub>3</sub>): δ 8.04 (d, J = 8.9 Hz, 1H), 7.92 (dd, J = 8.2, 3.2 Hz, 1H), 7.88 (d, J = 9.0 Hz, 1H), 7.78 (d, J = 9.7 Hz, 1H), 7.50-7.34 (m, 8H), 7.28-7.26 (m, 2H), 7.18 (dd, J = 8.9, 1.5 Hz, 1H), 7.07 (d, J = 8.5 Hz, 1H), 3.18 (d, J = 10.9 Hz, 3H), 3.09 (d, J = 9.2 Hz, 3H), 2.90 (d, J = 7.9 Hz, 3H).

<sup>31</sup>P NMR (121.4 MHz; CDCl<sub>3</sub>): 24.02.

MS (ESI-Q-TOF): calculated for C<sub>30</sub>H<sub>25</sub>N<sub>4</sub>OP = 488.18 Found *m/z* = 489.13 [M + 1]<sup>+</sup> and 511.11 [M + Na]<sup>+</sup>

#### 5. General procedure D: synthesis of amino-phosphoroamides (**5a**), (**5b**), (**5c**), (**5d**), (**5f**), (**5g**), (**5h**):

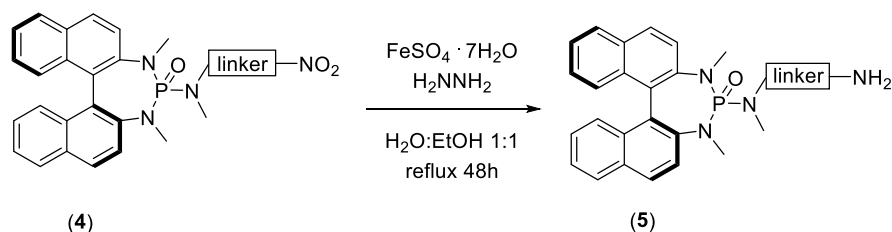

Phosphoroamide **4** (1 eq, 1 mmol), FeSO<sub>4</sub> · 7H<sub>2</sub>O (0.5 eq, 0.5 mmol, 139 mg) and hydrazine mono hydrate (10 eq, 10 mmol, 0.491 uL) were dissolved in a water:ethanol 1:1 solution (5mL:5mL) and stirred for 10 min, then the heterogeneous mixture was gently refluxed for 48 h. After this time the mixture was cooled to RT, diluted with AcOEt (15 mL), and the phases were separated. The organic extracts were dried over Na<sub>2</sub>SO<sub>4</sub>, filtered

and concentrated by rotary evaporation under vacuum. The residue was purified by silica gel flash chromatography using ethyl acetate (100%) as eluent to yield phosphoroamides with different yields.

#### Phosphoroamide **5a**

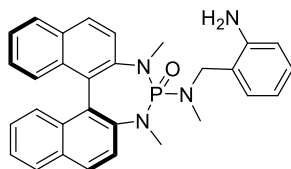

The product was obtained starting from phosphoroamide **4a** in 92% yield.

$^1\text{H}$  NMR (300 MHz;  $\text{CDCl}_3$ ):  $\delta$  7.98-7.85 (m, 4H), 7.73 (d,  $J$  = 8.8 Hz, 1H), 7.56 (d,  $J$  = 8.8 Hz, 1H), 7.43-7.33 (m, 2H), 7.27-7.21 (m, 2H), 7.17-7.04 (m, 3H), 6.97 (d,  $J$  = 7.4 Hz, 1H), 6.66 (d,  $J$  = 7.9 Hz, 1H), 6.60 (t,  $J$  = 7.3 Hz, 1H), 4.61 (br, 2H), 4.41 (dd,  $J$  = 14.4, 9.2 Hz, 1H), 4.17-4.09 (m, 1H), 3.11 (d,  $J$  = 9.6, 3H), 3.04 (d,  $J$  = 8.1, 3H), 2.07 (d,  $J$  = 9.1 Hz, 3H).

$^{31}\text{P}$  NMR (121.4 MHz;  $\text{CDCl}_3$ ): 30.13.

#### Phosphoroamide **5b**

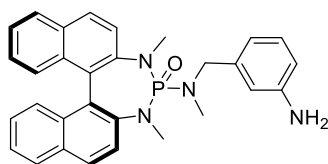

The product was obtained starting from phosphoroamide **4b** in 98% yield.

$^1\text{H}$  NMR (300 MHz;  $\text{CDCl}_3$ ):  $\delta$  7.97 (d,  $J$  = 8.9 Hz, 1H), 7.85 (m, 3H), 7.74 (d,  $J$  = 8.8 Hz, 1H), 7.42 (d,  $J$  = 8.8 Hz, 1H), 7.35 (m, 2H), 7.22 (m, 2H), 7.13 (t, 2H), 7.06 (d, 1H), 6.73 (m, 2H), 6.60 (d,  $J$  = 7.8 Hz, 1H), 4.20 (dd,  $J$  = 14.7, 7.3 Hz, 1H), 4.02 (dd,  $J$  = 14.8, 10.4 Hz, 1H), 3.65 (br, 1H), 3.07 (d,  $J$  = 7.1 Hz, 3H), 3.04 (d,  $J$  = 9.2 Hz, 3H), 2.20 (d,  $J$  = 9.0 Hz, 3H).

$^{31}\text{P}$  NMR (121.4 MHz;  $\text{CDCl}_3$ ):  $\delta$  29.27.

#### Phosphoroamide **5c**

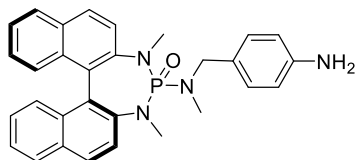

The product was obtained starting from phosphoroamide **4c** in 92% yield.

$^1\text{H}$  NMR (300 MHz;  $\text{CDCl}_3$ ):  $\delta$  7.98 (d,  $J$  = 8.9 Hz, 1H), 7.90-7.84 (m, 3H), 7.76 (d,  $J$  = 8.8 Hz, 1H), 7.45-7.36 (m, 3H), 7.28-7.14 (m, 5H), 7.05 (d,  $J$  = 8.5 Hz, 1H), 6.74 (d,  $J$  = 7.9 Hz, 2H), 4.20 (dd,  $J$  = 14.5, 7.2 Hz, 1H), 4.03 (dd,  $J$  = 14.3, 10.4 Hz, 1H), 3.04 (d,  $J$  = 4.8 Hz, 3H), 3.01 (d,  $J$  = 6.2 Hz, 3H), 2.13 (d,  $J$  = 9.0 Hz, 3H).

$^{31}\text{P}$  NMR (121.4 MHz;  $\text{CDCl}_3$ ):  $\delta$  29.30.

#### Phosphoroamide **5f**

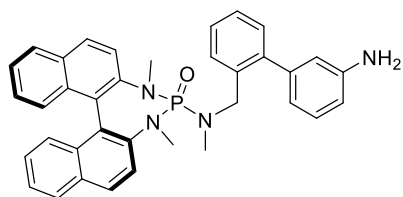

The product was obtained starting from phosphoroamide **4f** in 17% yield.

$^1\text{H}$  NMR (300 MHz;  $\text{CDCl}_3$ ):  $\delta$  8.16 (d,  $J$  = 7.5 Hz, 1H), 8.05 (s, 1H), 7.96 (d,  $J$  = 9.0 Hz, 1H), 7.85-7.71 (m, 5H), 7.49-7.01 (m, 11H), 4.25-4.10 (m, 1H), 4.09-3.85 (m, 1H), 3.10 (d, 3H), 3.04 (d,  $J$  = 8.9 Hz, 6H), 2.16 (d,  $J$  = 8.8 Hz, 3H), 1.25 (br, 2H).

$^{31}\text{P}$  NMR (121.4 MHz;  $\text{CDCl}_3$ ): 29.34.

#### Phosphoroamide **5g**

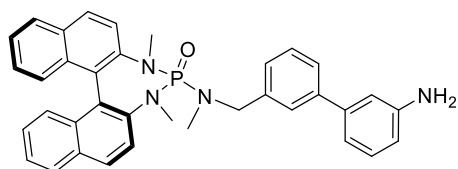

The product was obtained starting from phosphoroamide **4g** in 85% yield.

$^1\text{H}$  NMR (300 MHz;  $\text{CDCl}_3$ ):  $\delta$  7.97 (d,  $J$  = 9.1 Hz, 1H), 7.85-7.71 (m, 6H), 7.49-7.01 (m, 12H), 6.67 (d,  $J$  = 8.1 Hz, 1H), 4.39 (dd,  $J$  = 15.8, 7.0 Hz, 1H), 4.12 (dd,  $J$  = 17.1, 8.0, 1H), 3.75 (br, 2H), 3.06 (d,  $J$  = 7.1 Hz, 6H), 2.23 (d,  $J$  = 9.0 Hz, 3H).

$^{31}\text{P}$  NMR (121.4 MHz;  $\text{CDCl}_3$ ): 29.82.

#### Phosphoroamide **5h**

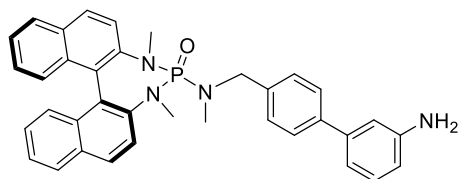

The product was obtained starting from phosphoroamide **4h** in 37% yield.

$^1\text{H}$  NMR (300 MHz;  $\text{CDCl}_3$ ):  $\delta$  7.98 (d,  $J$  = 9.1 Hz, 1H), 7.90-7.79 (m, 3H), 7.76 (d,  $J$  = 8.8 Hz, 1H), 7.66-7.51 (m, 2H), 7.44-7.34 (m, 5H), 7.23 (t,  $J$  = 7.9 Hz, 3H), 7.14 (t,  $J$  = 7.9 Hz, 1H), 7.07-6.98 (m, 2H), 6.94 (s, 1H), 6.68 (d,  $J$  = 7.9 Hz, 1H), 4.36 (dd,  $J$  = 14.7, 7.3 Hz, 1H), 4.15 (dd,  $J$  = 16.7, 9.2 Hz, 2H), 3.07 (d,  $J$  = 10.0 Hz, 6H), 2.21 (d,  $J$  = 9.0 Hz, 3H).

$^{31}\text{P}$  NMR (121.4 MHz;  $\text{CDCl}_3$ ): 29.02.

### Synthesis of Phosphoroamide **5e**

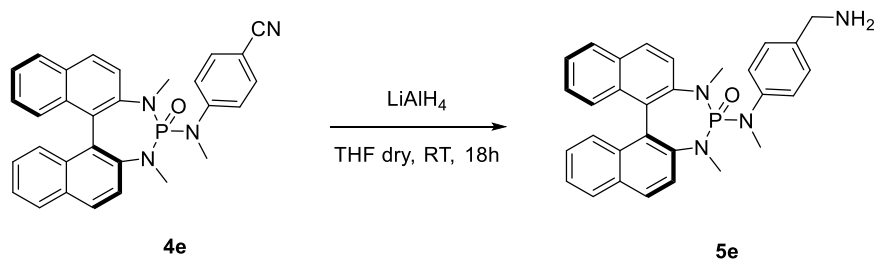

A solution of phosphoroamide **4e** (1 eq, 1 mmol, 488.5 mg) in dry THF (4 mL) was slowly added to a 0 °C suspension of  $\text{LiAlH}_4$  (1.5 eq, 1.5 mmol, 56.9 mg) in THF (1 mL). The mixture was allowed to reach RT and was stirred for 18 h. After this time, a quench with  $\text{NaHCO}_3$  ss (1.0 mL) was performed. The resultant gray precipitate was filtered through Celite pad and washed with diethyl ether (3 x 10 mL). The organic solutions were combined and the solvent was removed by rotary evaporation under vacuum. The crude compound was purified by silica gel flash chromatography using  $\text{CH}_2\text{Cl}_2/\text{MeOH}$  (9:1, v:v) as eluent allowing to obtain the title compound in 76% yield.

$^1\text{H}$  NMR (300 MHz;  $\text{CDCl}_3$ ):  $\delta$  7.99 (d,  $J$  = 8.9 Hz, 1H), 7.86 (dd,  $J$  = 8.2, 4.0 Hz, 2H), 7.79 (dd,  $J$  = 12.7, 8.8 Hz, 2H), 7.39-7.27 (m, 3H), 7.25-7.10 (m, 6H), 3.81 (s, 2H), 3.21 (d,  $J$  = 10.6 Hz, 3H), 3.02 (d,  $J$  = 9.1 Hz, 3H), 2.77 (d,  $J$  = 8.1 Hz, 3H), 2.54 (br, 2H).

$^{31}\text{P}$  NMR (121.4 MHz;  $\text{CDCl}_3$ ): 25.27.

### 6. General procedure E: synthesis of SAPAs **7a-h**:

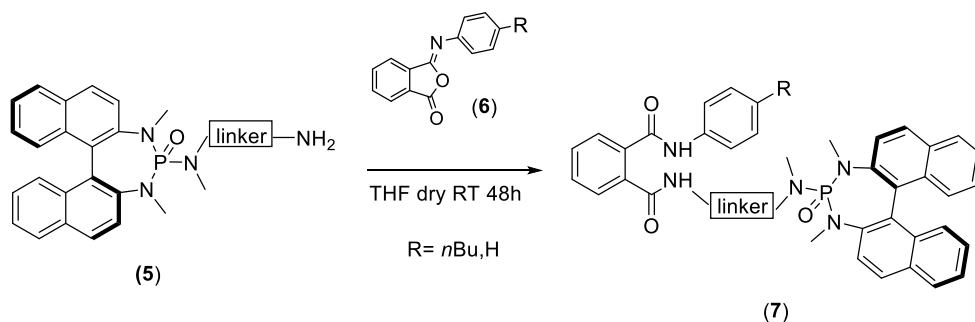

The desired phosphoroamide **(5)** (1 eq, 0.1 mmol) and the desired phthalisoimide **(6)** (3 eq, 0.3 mmol) were dissolved in dry THF (2 mL). The homogeneous mixture was stirred at RT for 48 h, then quenched with 5.0 mL of HCl 5%. The phases, diluted with ethyl acetate were separated and the obtained aqueous layer was washed with ethyl acetate (5.0 mL). The combined organic extracts were washed with brine, dried over  $\text{Na}_2\text{SO}_4$ , filtered and the filtrate was concentrated by rotary evaporation. The residue was purified by silica gel flash chromatography using different mixtures furnishing the desired product in different yields.

### Phosphoroamide **7a**

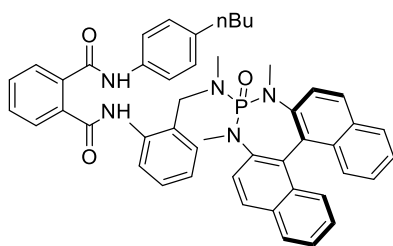

Phosphoroamide (**7a**) was synthesized starting from phosphoroamide (**5a**) and phthalisoimide (**6b**). The crude product was purified by silica gel flash chromatography using ethyl acetate (100%) as eluent. The product-containing fractions were combined and the solvent was removed by rotary evaporation under vacuum to yield the product with 44% yield.

$^1\text{H}$  NMR (600 MHz;  $\text{CDCl}_3$ ):  $\delta$  10.35 (s, 1H), 9.42 (s, 1H), 8.42 (d,  $J$  = 8.2 Hz, 1H), 7.94-7.85 (m, 4H), 7.78 (d, 1H), 7.76 (d,  $J$  = 7.0 Hz, 1H), 7.56-7.47 (m, 4H), 7.44-7.35 (m, 4H), 7.22-7.15 (m, 2H), 7.17-7.07 (m, 4H), 7.03-6.95 (m, 3H), 4.32 (dd,  $J$  = 14.3, 11.9 Hz, 1H), 4.16 (dd,  $J$  = 14.8, 6.4 Hz, 1H), 2.82 (d,  $J$  = 10.3 Hz, 3H), 2.70 (d,  $J$  = 9.3 Hz, 3H), 2.52 (t,  $J$  = 7.6 Hz, 2H), 2.09 (d,  $J$  = 9.1 Hz, 3H), 1.57-1.53 (m, 2H), 1.31-1.26 (m, 2H), 0.91 (t,  $J$  = 7.3 Hz, 3H).

$^{13}\text{C}$  NMR (600 MHz;  $\text{CDCl}_3$ ):  $\delta$  168.7, 166.8, 142.3, 140.8, 138.6, 137.0, 136.3, 136.2, 135.7, 132.5, 132.4, 131.2, 131.1, 130.8, 130.2, 130.0, 129.7, 129.3, 129.0, 128.8 (3C), 128.4, 128.1, 128.0, 127.8, 127.4, 127.3, 126.4, 126.2, 125.4, 125.2, 124.1, 124.0, 123.9, 122.9, 122.7, 119.9, 50.8 (2C), 35.5, 35.4, 35.0, 34.9, 34.5, 33.6, 22.2, 13.9.

$^{31}\text{P}$  NMR (121.4 MHz;  $\text{CDCl}_3$ ):  $\delta$  29.91.

MS (ESI-Q-TOF): calculated for  $\text{C}_{48}\text{H}_{46}\text{N}_5\text{O}_3\text{P}$  : 771.33 Found  $m/z$  = 794.33  $[\text{M} + \text{Na}]^+$

### Phosphoroamide **7b**

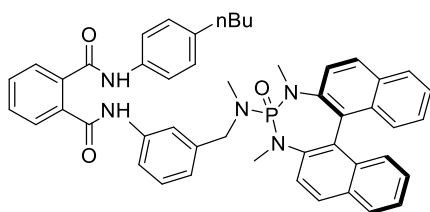

Phosphoroamide (**7b**) was synthesized starting from phosphoroamide (**5b**) and phthalisoimide (**6b**). The crude product was purified by silica gel flash chromatography using  $\text{CH}_2\text{Cl}_2/\text{MeOH}$  (98:2 v:v) as eluent. The product-containing fractions were combined and the solvent was removed by rotary evaporation under vacuum to yield the product with 51% yield

$^1\text{H}$  NMR (300 MHz;  $\text{CDCl}_3$ ): 9.82 (s, 1H), 9.60 (s, 1H), 7.92 (d,  $J$  = 8.8 Hz, 1H), 7.85 (d,  $J$  = 8.1 Hz, 1H), 7.79 (t,  $J$  = 7.6 Hz, 2H), 7.69-7.66 (m, 3H), 7.59-7.54 (m, 2H), 7.48-7.30 (m, 5H), 7.29-7.25 (m, 2H), 7.18-7.12 (m, 4H), 7.50 (s, 1H), 7.04 (d,  $J$  = 8.1 Hz, 1H), 6.97 (d,  $J$  = 8.1 Hz, 2H), 4.19 (dd,  $J$  = 14.4, 6.6 Hz, 1H), 3.98 (dd,  $J$  = 14.5,

10.3 Hz, 1H), 3.00 (d,  $J = 2.8$  Hz, 3H), 2.97 (d,  $J = 4.6$  Hz, 3H), 2.47 (t,  $J = 7.6$  Hz, 2H), 2.11 (d,  $J = 8.8$  Hz, 3H), 1.53-1.43 (m, 2H), 1.31-1.26j (m, 2H), 0.87 (t,  $J = 7.2$  Hz, 3H).

$^{13}\text{C}$  NMR (500 MHz;  $\text{CDCl}_3$ ):  $\delta$  167.6, 167.4, 143.0, 141.5, 139.2 (2C), 138.5, 135.7, 135.1, 134.9, 132.6, 132.5, 131.3, 131.2, 130.4 (2C), 129.7, 129.3, 128.9 (2C), 128.7 (3C), 128.4, 128.1, 128.0, 127.8, 127.4, 127.3, 126.1, 126.0, 125.2, 125.0, 124.5, 123.3, 122.7, 120.3 (2C), 120.0, 119.4, 53.4, 36.0, 35.0 (2C), 34.2, 33.6, 22.3, 13.9,

$^{31}\text{P}$  NMR (121.4 MHz;  $\text{CDCl}_3$ ):  $\delta$  29.23.

MS (ESI+): calculated for  $\text{C}_{48}\text{H}_{46}\text{N}_5\text{O}_3\text{P} = 771.33$  Found  $m/z = 772.49$   $[\text{M}]^+$  and  $794.86$   $[\text{M} + \text{Na}]^+$ .

#### Phosphoroamide **7c**

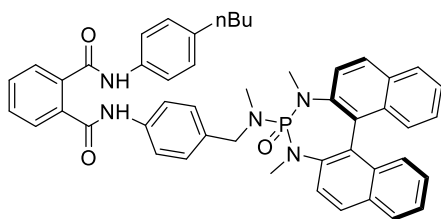

Phosphoroamide (**7c**) was synthesized starting from phosphoroamide (**5b**) and phthalisoimide (**6a**). The crude product was purified by silica gel flash chromatography using ethyl acetate/methanol (9:1 v:v) as eluent. The product-containing fractions were combined and the solvent was removed by rotary evaporation under vacuum to yield the product with 66% yield.

$^1\text{H}$  NMR (300 MHz;  $\text{CDCl}_3$ ):  $\delta$  9.25 (s, 1H), 9.15 (s, 1H), 7.93 (d,  $J = 8.9$  Hz, 1H), 7.86-7.81 (m, 3H), , 7.67-7.63 (m, 6H), 7.51 (d,  $J = 8.1$  Hz, 2H), 7.41-7.36 (m, 2H), 7.32-7.25 (m, 2H), 7.25-7.20 (m, 4H), 7.17-7.10 (m, 1H), 7.05 (d,  $J = 8.4$  Hz, 3H), 4.16 (dd,  $J = 15.2, 7.4$  Hz, 1H), 4.04 (dd,  $J = 14.5, 10.1$  Hz, 1H), 2.97 (d,  $J = 3.6$  Hz, 3H), 2.94 (d,  $J = 2.2$  Hz, 3H), 2.52 (t,  $J = 7.7$  Hz, 2H), 2.12 (d,  $J = 8.9$  Hz, 3H), 1.58-1.48 (m, 2H), 1.32-1.25 (m, 2H), 0.89 (t,  $J = 7.3$  Hz, 3H)

MS (ESI-Q-TOF): calculated for  $\text{C}_{48}\text{H}_{46}\text{N}_5\text{O}_3\text{P} : 771.33$  Found  $m/z = 794.29$   $[\text{M} + \text{Na}]^+$

#### Phosphoroamide **7d**

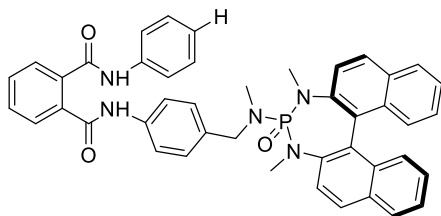

Phosphoroamide (**7d**) was synthesized starting from phosphoroamide (**5b**) and phthalisoimide (**6b**). The crude product was purified by silica gel flash chromatography using ethyl acetate (100%) as eluent. The product-containing fractions were combined and the solvent was removed by rotary evaporation under vacuum to yield the product with 66% yield.

$^1\text{H}$  NMR (300 MHz;  $\text{CDCl}_3$ ):  $\delta$  9.25 (s, 1H),  $\delta$  9.15 (s, 1H),  $\delta$  7.94-7.91 (m, 1H),  $\delta$  7.86-7.81 (m, 3H),  $\delta$  7.53 (d, 1H),  $\delta$  7.67-7.33 (m, 6H),  $\delta$  7.51 (d, 2H),  $\delta$  7.38 (t, 2H),  $\delta$  7.30 (t, 2H),  $\delta$  7.25-7.20 (m, 4H),  $\delta$  7.31 (t, 1H),  $\delta$  7.04 (d, 3H),  $\delta$  4.25 (dd,  $J$  = 14.4, 6.8 Hz, 1H),  $\delta$  4.15 (dd,  $J$  = 14.1, 10.1 Hz, 1H),  $\delta$  2.97 (d, 6H),  $\delta$  2.12 (d,  $J$  = 7.2 Hz, 3H).

$^{31}\text{P}$  NMR (121.4 MHz;  $\text{CDCl}_3$ ):  $\delta$  29.17.

#### Phosphoroamide **7e**

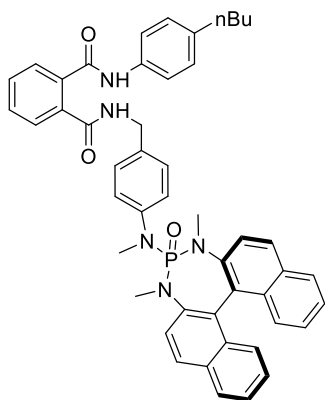

Phosphoroamide (**7e**) was synthesized starting from phosphoroamide (**5e**) and phthalisoimide (**6b**). The crude product was purified by silica gel flash chromatography using  $\text{CH}_2\text{Cl}_2/\text{MeOH}$  (95:5 v:v) as eluent. The product-containing fractions were combined and the solvent was removed by rotary evaporation under vacuum to yield the product with 57% yield.

$^1\text{H}$  NMR (300 MHz;  $\text{CDCl}_3$ ):  $\delta$  9.35 (s, 1H), 8.00 (d,  $J$  = 8.8 Hz, 1H), 7.90 (d,  $J$  = 8.2 Hz, 1H), 7.80 (d,  $J$  = 9.0 Hz, 2H), 7.73 (d,  $J$  = 8.8 Hz, 1H), 7.52 (d,  $J$  = 7.2 Hz, 2H), 7.45-7.35 (m, 6H), 7.29-7.23 (m, 3H), 7.17-7.02 (m, 7H), 4.46 (d,  $J$  = 5.7 Hz, 2H), 3.17 (d,  $J$  = 10.6 Hz, 3H), 2.98 (d,  $J$  = 9.1 Hz, 3H), 2.77 (d,  $J$  = 8.0 Hz, 3H), 2.58 (t,  $J$  = 7.7 Hz, 2H), 1.58 (m, 2H), 1.36 (d,  $J$  = 7.6 Hz, 2H), 0.93 (t,  $J$  = 7.3 Hz, 3H).

$^{31}\text{P}$  NMR (121.4 MHz;  $\text{CDCl}_3$ ):  $\delta$  29.23.

#### Phosphoroamide **7f**

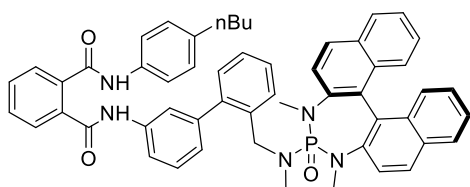

Phosphoroamide (**7f**) was synthesized starting from phosphoroamide (**5f**) and phthalisoimide (**6b**). The crude product was purified by silica gel flash chromatography using  $\text{CH}_2\text{Cl}_2/\text{MeOH}$  (98:2 v:v) as eluent. The product-containing fractions were combined and the solvent was removed by rotary evaporation under vacuum to yield the product with 39% yield.

$^1\text{H}$  NMR (300 MHz;  $\text{CDCl}_3$ ):  $\delta$  9.22 (s, 1H), 9.04 (s, 1H), 7.94 (d,  $J$  = 8.86 Hz, 1H), 7.86 (d,  $J$  = 8.14 Hz, 1H), 7.82 (d,  $J$  = 8.14 Hz, 1H), 7.78 (d,  $J$  = 8.91 Hz, 1H), 7.72-7.63 (m, 5H), 7.50-7.46 (m, 3H), 7.79-7.30 (m, 7H), 7.21-7.13 (m, 5H), 7.04 (d,  $J$  = 8.54 Hz, 3H), 6.84 (d,  $J$  = 7.58 Hz, 1H), 4.20 (m, 1H), 4.09 (m, 1H), 3.00 (d,  $J$  = 8.68, 3H), 2.92 (d,  $J$  = 10.29 Hz, 3H), 2.54 (t,  $J$  = 7.66 Hz, 2H), 2.13 (m, 3H), 1.55 (m, 2H), 1.32 (m, 2H), 0.92 (t,  $J$  = 7.26 Hz, 3H).

$^{31}\text{P}$  NMR (121.4 MHz;  $\text{CDCl}_3$ ):  $\delta$  29.64.

$^{13}\text{C}$  NMR (75 MHz;  $\text{CDCl}_3$ ):  $\delta$  167.4, 167.2, 142.9, 141.5, 141.3 (2C), 139.4, 137.9, 135.6 (2C), 135.1, 134.9, 132.6 (2C), 131.2 (2C), 130.5, 130.4, 130.1, 129.7, 129.1, 128.8 (5C), 128.0, 127.9 (2C), 127.8 (2C), 127.6, 127.4, 126.8, 126.1, 126.0, 125.5, 125.2 (2C), 124.9, 123.3, 122.7, 121.2, 120.3 (2C), 119.2, 50.6, 35.1, 34.6, 33.6, 29.7, 22.5, 13.9.

MS (ESI-Q-TOF): calculated for  $\text{C}_{54}\text{H}_{50}\text{N}_5\text{O}_3\text{P}$  = 847.37 Found  $m/z$  = 848.32  $[\text{M} + 1]^+$  and 870.37  $[\text{M} + \text{Na}]^+$ .

#### Phosphoroamide **7g**

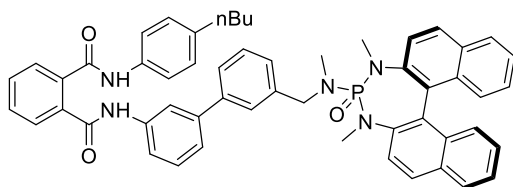

Phosphoroamide (**7g**) was synthesized starting from phosphoroamide (**5g**) and phthalisoimide (**6b**). The crude product was purified by silica gel flash chromatography using  $\text{CH}_2\text{Cl}_2/\text{MeOH}$  (98:2 v:v) as eluent. The product-containing fractions were combined and the solvent was removed by rotary evaporation under vacuum to yield the product with 39% yield.

$^1\text{H}$  NMR (300 MHz;  $\text{CDCl}_3$ ):  $\delta$  9.56 (s, 1H), 9.21 (s, 1H), 7.91 (d,  $J$  = 9.0 Hz, 1H), 7.85-7.78 (m, 3H), 7.68 (d,  $J$  = 8.9 Hz, 1H), 7.60-7.46 (m, 7H), 7.39-7.29 (m, 9H), 7.20 (m, 2H), 7.16-7.09 (m, 1H), 7.06-6.98 (m, 3H), 4.30 (dd,  $J$  = 14.8, 7.5 Hz, 1H), 4.10 (dd,  $J$  = 17.9, 7.8 Hz, 1H), 3.01 (d,  $J$  = 4.3 Hz, 3H), 2.98 (d,  $J$  = 2.9 Hz, 3H), 2.50 (t,  $J$  = 7.6 Hz, 1H), 2.18 (d,  $J$  = 9.0 Hz, 3H), 1.55 (m, 2H), 1.32 (m, 2H), 0.88 (t,  $J$  = 7.3 Hz, 3H).

$^{31}\text{P}$  NMR (121.4 MHz;  $\text{CDCl}_3$ ):  $\delta$  29.25.

$^{13}\text{C}$  NMR (75 MHz;  $\text{CDCl}_3$ ): 167.04 (2C), 142.44, 140.97 (3C), 140.40, 138.58, 138.32 (2C), 135.27,, 134.64, 134.45, 132.11, 132.02, 130.73 (2C), 130.65, 129.68, 129.61, 129.18, 128.69 (2C), 128.30, 128.10 (3C), 127.95, 127.59, 127.45, 127.35, 126.89 (2C), 126.56, 125.65 (2C), 125.52, 124.69, 124.43, 122.69, 122.55, 122.16, 119.83 (2C), 118.97, 118.61, 53.06, 35.47 34.54, 34.46, 33.75, 33.04, 21.75, 13.40 .

MS (ESI-Q-TOF): calculated for  $\text{C}_{54}\text{H}_{50}\text{N}_5\text{O}_3\text{P}$  = 847.37 Found  $m/z$  = 870.30  $[\text{M} + \text{Na}]^+$ .

## Phosphoroamide **7h**

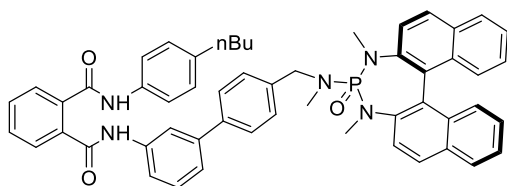

Phosphoroamide (**7h**) was synthesized starting from phosphoroamide (**5h**) and phthalisoimide (**6b**). The crude product was purified by silica gel flash chromatography using CH<sub>2</sub>Cl<sub>2</sub>/MeOH (98:2 v:v) as eluent. The product-containing fractions were combined and the solvent was removed by rotary evaporation under vacuum to yield the product with 46% yield.

<sup>1</sup>H NMR (300 MHz; CDCl<sub>3</sub>): δ 9.46 (s, 1H), 9.04 (s, 1H), 7.96 (d, J = 8.5 Hz, 2H), 7.89-7.84 (m, 3H), 7.72 (d, J = 8.8 Hz, 2H), 7.63-7.52 (m, 8H), 7.44-7.37 (m, 11H), 7.24 (m, 2H), 7.21-7.12 (m, 1H), 7.08 (d, J = 8.4 Hz, 3H), 4.33 (dd, J = 14.9, 7.3 Hz, 1H), 4.13 (dd, J = 14.8, 10.2 Hz, 1H), 3.06 (d, J = 2.3 Hz, 3H), 3.03 (d, J = 3.7 Hz, 3H), 2.55 (t, J = 7.6 Hz, 2H), 2.21 (d, J = 9.0 Hz, 3H), 1.55 (m, 2H), 1.32 (m, 2H), 0.91 (t, J = 7.3 Hz, 3H).

<sup>31</sup>P NMR (121.4 MHz; CDCl<sub>3</sub>): δ 29.22.

<sup>13</sup>C NMR (75 MHz; CDCl<sub>3</sub>): δ 167.65, 167.55, 142.93, 141.46, 141.21, 139.77, 137.88, 137.45,, 137.40, 135.86, 135.12, 134.96, 132.57, 131.48, 131.20, 131.13, 130.05, 129.74, 129.66, 129.14, 128.63 (2C), 128.53, 128.47, 128.29, 128.06, 127.93 (2C), 127.82, 127.34, 127.25, 127.22, 127.12 (2C), 126.12, 125.98, 125.15, 124.89, 123.20, 123.19, 122.89, 122.61, 120.23 (2C), 119.30, 118.88, 53.24, 35.97, 35.08, 34.98, 34.21, 33.58, 22.29, 13.95 .

MS (ESI-Q-TOF): calculated for C<sub>54</sub>H<sub>50</sub>N<sub>5</sub>O<sub>3</sub>P = 847.37 Found *m/z* = 848.32 [M + 1]<sup>+</sup> and 870.31 [M + Na]<sup>+</sup>.

### 6.1. Synthesis of compound **7i**:

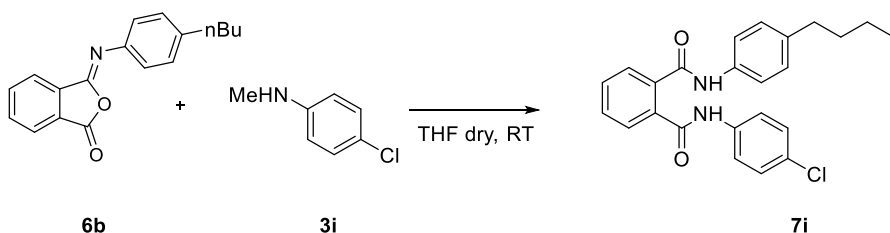

Compound (**6b**) (1 eq, 1.43 mmol, 400 mg) and amine (**3i**) (1.1 eq, 1.57 mmol, 200 mg) were dissolved in dry THF (15 mL). After 24 h refluxing, the mixture was cooled to RT and 5.0 mL of HCl 5% solution were added. The crude was then diluted with ethyl acetate (30 mL), and the organic layer was washed with brine, dried over Na<sub>2</sub>SO<sub>4</sub>, filtered and concentrated by rotary evaporation. The residue was purified by silica gel flash chromatography using ethyl acetate/CH<sub>2</sub>Cl<sub>2</sub> (9:1 v:v) as eluent furnishing the desired product in 42% yield.

<sup>1</sup>H NMR (300 MHz; CDCl<sub>3</sub>): 8.94 (s, 1H), 8.76 (s, 1H), 8.03, 7.59-7.09 (m, 13H), 2.60 (m, 2H), 1.59 (m, 2H), 1.37 (m, 2H), 0.92 (t, J = 6.9 Hz, 3H).

## 7. General procedure F: synthesis of 3,5-bisubstituted pyridines **13a-b**

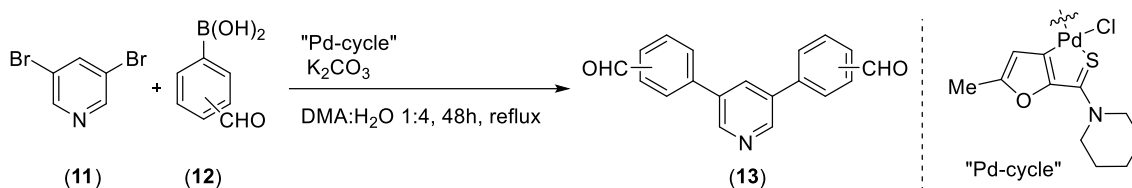

"Pd-cycle" catalyst was synthesized according to a procedure reported in literature.<sup>[3]</sup>

Pd catalyst (0.02 eq, 0.1 mmol, 76 mg) and 3,5-dibromopyridine **11** (1 eq, 5.54 mmol, 1.29g) were dissolved in 8.25 mL of dimethylacetamide. The mixture was stirred for 15 min, then solid  $K_2CO_3$  (4 eq, 21.82 mmol, 3.0 g), the desired boronic acid **12** (2.2 eq, 12 mmol, 1.8 g) and 2.75 ml of water were added and the mixture was gently refluxed for 48h. After that time, the mixture was cooled at RT and diluted with 30 ml of  $CHCl_3$ . The mixture was then washed with water (15 ml) and HCl 3% solution (15 ml). The organic layer was collected, dried over  $Na_2SO_4$ , filtered and concentrated by rotary evaporation. The residue was purified by silica gel flash chromatography using MeOH/ $CH_2Cl_2$  (1:99 v:v) as eluent furnishing the desired product

### Compound **13a**

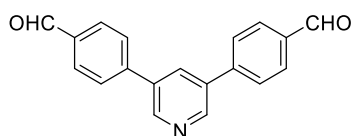

The product was obtained starting from (4-formylphenyl)boronic acid **12a** in 65% yield.

$^1H$  NMR (300 MHz;  $CDCl_3$ ):  $\delta$  10.14 (s, 2H), 8.01 (d,  $J$  = 9.0 Hz, 4H), 7.88 (s, 1H), 7.81 (d,  $J$  = 9.0 Hz, 4H), 7.69 (d,  $J$  = 6.0 Hz, 2H), 7.64-7.59 (m, 1H).

MS (ESI<sup>+</sup>): calculated for  $C_{19}H_{13}NO_2$  = 287.09. Found  $m/z$  = 288.44  $[M + 1]^+$ .

### Compound **13b**

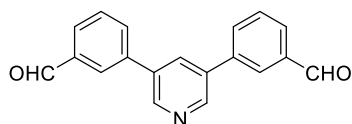

The product was obtained starting from (3-formylphenyl)boronic acid **12b** in 52% yield.

$^1H$  NMR (300 MHz;  $CDCl_3$ ):  $\delta$  10.14 (s, 2H), 8.92 (s, 2H), 8.17 (d,  $J$  = 7.1 Hz, 2H), 7.95 (t,  $J$  = 8.7 Hz, 3H), 7.71 (t,  $J$  = 7.8 Hz, 2H), 7.26 (s, 2H).

$^{13}C$  NMR (75 MHz, DMSO)  $\delta$  191.7, 149.0, 148.1, 147.5, 138.4, 137.2, 135.5, 134.5, 132.9, 130.0, 129.9, 129.8, 129.5, 127.9, 123.7.

MS (ESI<sup>+</sup>): calculated for  $C_{19}H_{13}NO_2$  = 287.09. Found  $m/z$  = 288.45  $[M + 1]^+$ .

## 8. General procedure G: synthesis of bis(N-methylamino)-pyridines 14a-b

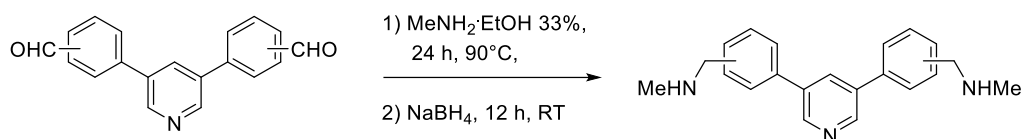

The desired bisamino-pyridine **13a** or **13b** (1 eq, 0.57 mmol, 165 mg), methylamine (33% EtOH solution, 10 eq, 5.74 mmol, 0.715 mL) and molecular sieves (ca 30 mg) were introduced in a screw cap vial and the mixture was heated at  $80^\circ\text{C}$  for 24h. After cooling to RT, the mixture was diluted with 3 mL of EtOH and cooled to  $0^\circ\text{C}$ .  $\text{NaBH}_4$  (3 eq, 1.72 mmol, 65 mg) was added and the resultant mixture allowed warming to RT and reacting for 24 h. The mixture was then quenched with aq.  $\text{NH}_4\text{OH}$  5% (4 mL) and the solvent was concentrated by rotary evaporation. The obtained aqueous layer was extracted with  $\text{CH}_2\text{Cl}_2$  (2 x 5 mL). The combined organic extracts were dried over  $\text{Na}_2\text{SO}_4$ , filtered and the filtrate was concentrated by rotary evaporation. The residue was purified by silica gel flash chromatography using  $\text{MeOH}/\text{CH}_2\text{Cl}_2$  (3:7 v:v) +  $\text{Et}_3\text{N}$  1% as eluent furnishing the desired product.

### Compound **14a**

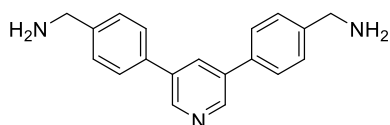

The product was obtained starting from compound **13a** in 82% yield.

$^1\text{H}$  NMR (300 MHz;  $\text{CDCl}_3$ ):  $\delta$  8.80 (s, 2H), 8.01 (s, 1H), 7.61 (d,  $J = 8.1$  Hz, 4H), 7.46 (d,  $J = 7.9$  Hz, 4H), 4.12 (br, 2H), 3.88 (s, 4H), 2.52 (s, 6H).

MS (ESI<sup>+</sup>): calculated for  $\text{C}_{21}\text{H}_{23}\text{N}_3 = 317.19$ . Found  $m/z = 318.44$  [ $\text{M} + 1$ ]<sup>+</sup>.

### Compound **14b**

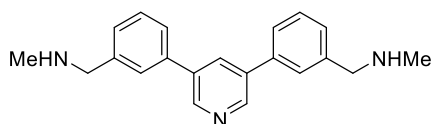

The product was obtained starting from compound **13b** in 45% yield.

$^1\text{H}$  NMR (300 MHz;  $\text{CDCl}_3$ ):  $\delta$  8.79 (s, 2H), 8.08 (s, 1H), 7.65 (s, 2H), 7.54 (d,  $J = 7.5$  Hz, 2H), 7.44 (t,  $J = 7.5$  Hz, 2H), 7.37 (d,  $J = 7.6$  Hz, 2H), 4.07 (br, 2H), 3.87 (s, 4H), 2.49 (s, 6H).

$^{13}\text{C}$  NMR (75 MHz, DMSO)  $\delta$  146.4, 146.3, 139.1, 137.4, 135.8, 132.4, 128.7, 128.6, 128.4, 127.8, 127.7, 126.8, 126.7, 125.6, 125.5, 54.7, 34.8.

## 9. General procedure H: synthesis of bisphosphoroamides 15a-b:

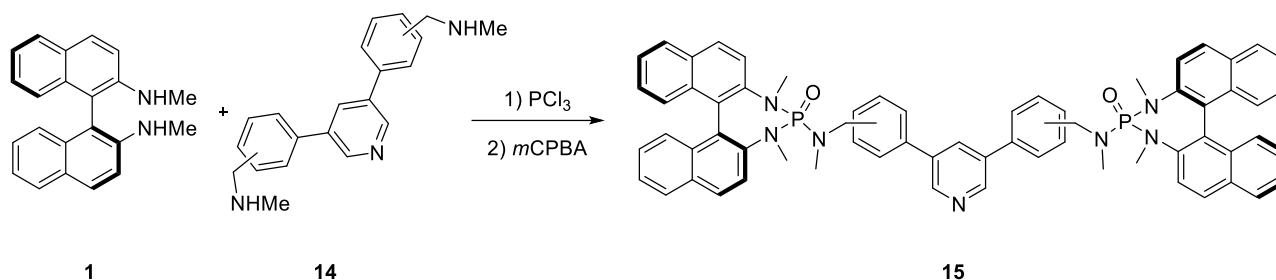

N,N'-dimethyl-1,1'-binaphthyl-2,2'-diamine (**1**) (1 eq, 1.66 mmol, 520 g) and Et<sub>3</sub>N (5 eq, 3.96 mmol, 0.552 mL) were dissolved in dry THF (18 mL). The homogeneous mixture was cooled to 0 °C then PCl<sub>3</sub> (6.3 eq, 10.45 mmol, 0.915 mL) was added dropwise via syringe whereupon a colorless precipitate formed immediately. The reaction mixture was stirred at 0 °C for 1.5 h, then was allowed to warm to room temperature and stirred for another 3 h. The volatiles were removed under high vacuum (room temperature, 0.5 mmHg) and Et<sub>2</sub>O (20.0 mL) was added via syringe, then the mixture was stirred for 5 min. After that the supernatant was canula-filtered into another round bottom flask. The remaining precipitate in the reaction flask was washed again with Et<sub>2</sub>O (20 mL) and filtered (2 times). The volatiles were removed under high vacuum (room temperature, 0.5 mmHg) to afford a light yellow solid. The solid was then dried for 12 h at reduced pressure (room temperature, 0.5 mmHg) to give a white solid foam (**2**). Dry CH<sub>2</sub>Cl<sub>2</sub> (10 mL) was added via syringe and the mixture was cooled to 0 °C. To this solution, a mixture of Et<sub>3</sub>N (5 eq, 3.96 mmol, 0.552 mL) and the desired bis(*N*-methylamino)-pyridine (**14**) (1 eq, 0.79 mmol, 250 mg) dissolved in dry CH<sub>2</sub>Cl<sub>2</sub> (12 mL) were added. The reaction mixture was allowed to warm to room temperature and stirred for 24 h. A solution of freshly crystallized *m*CPBA (70%) (3 eq, 2.37 mmol, 582 mg) dissolved in 2 mL of CH<sub>2</sub>Cl<sub>2</sub> was then added and the mixture was stirred for 72 h. After a quench with 10 mL of NH<sub>4</sub>Cl saturated aqueous solution, the phases were separated and aqueous layer was washed with CH<sub>2</sub>Cl<sub>2</sub> (10 mL). The combined organic extracts were washed with brine, dried over Na<sub>2</sub>SO<sub>4</sub>, filtered and concentrated by rotary evaporation. The crude residue was purified by silica gel flash chromatography using hexane:ethyl acetate (2:8 v:v) as eluent to yield the desired product as pale yellow solid.

### Compound **15a**

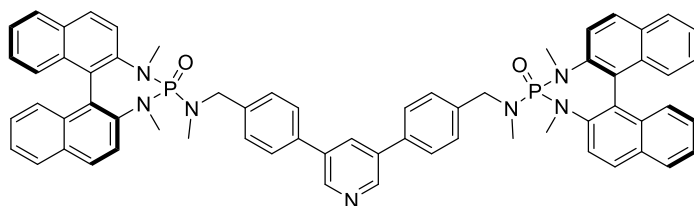

The product was obtained starting from compound **14a** in 52% yield.

$^1\text{H}$  NMR (300 MHz;  $\text{CDCl}_3$ ):  $\delta$  8.88 (s, 2H), 8.13 (s, 1H), 7.98-7.86 (m 10H), 7.79-7.65 (m, 8H), 7.58-7.51 (m, 4H), 7.50-7.43 (m, 2H), 7.40-7.34 (m, 5H), 7.25-7.16 (m, 6H), 7.13 (d, 2H), 7.07-7.04 (m, 3H), 4.41 (dd,  $J$  = 14.9, 7.3 Hz, 1H), 4.24 (dd,  $J$  = 14.1, 11.0 Hz, 1H), 3.09 (d,  $J$  = 9.4 Hz, 12H), 2.23 (d,  $J$  = 8.8 Hz, 6H).

$^{13}\text{C}$  NMR (192.5 MHz;  $\text{CDCl}_3$ ):  $\delta$  146.3, 142.7, 141.3, 138.8, 138.8, 136.4, 132.8, 132.5, 132.4, 131.1 (2C), 129.6, 129.1 (2C), 128.7, 128.0 (2C), 127.8, 127.8, 127.3 (2C), 127.2 (2C), 126.1, 125.9, 125.2, 124.8, 123.2, 122.6, 53.2, 36.1, 35.0, 34.2, 29.5.

$^{31}\text{P}$  NMR (121.4 MHz;  $\text{CDCl}_3$ ):  $\delta$  29.15.

MS (ESI $^-$ ): calculated for  $\text{C}_{65}\text{H}_{57}\text{N}_7\text{O}_2\text{P}_2$  = 1029.40 Found  $m/z$  = 521.45  $[\text{M} - 1]^-$ .

### Compound **15b**

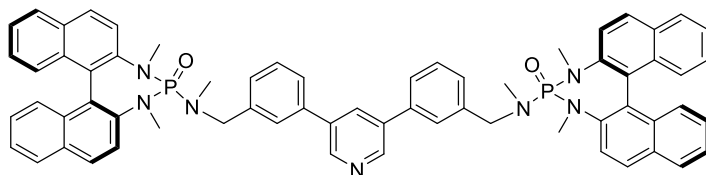

The product was obtained starting from compound **14b** in 56% yield.

$^1\text{H}$  NMR (600 MHz;  $\text{CDCl}_3$ ):  $\delta$  8.89 (s, 2H), 8.15 (s, 1H), 8.10-8.05 (m, 4H), 8.00 (d,  $J$  = 8.9 Hz, 1H), 7.96 (d,  $J$  = 7.8 Hz, 1H), 7.90 (d,  $J$  = 8.2 Hz, 1H), 7.85 (t,  $J$  = 8.4 Hz, 2H), 7.78 (d,  $J$  = 8.8 Hz, 1H), 7.69 (s, 1H), 7.63 (t,  $J$  = 7.5, 1H), 7.56-7.48 (m, 6H), 7.45-7.36 (m, 6H), 7.24-7.22 (m, 5H), 7.19-7.16 (m, 1H), 7.08 (d,  $J$  = 8.5 Hz, 2H), 4.48 (dd,  $J$  = 14.3, 6.5 Hz, 2H), 4.27 (dd,  $J$  = 14.6, 10.4 Hz, 2H), 3.10 (d,  $J$  = 8.0 Hz, 6H), 3.09 (d,  $J$  = 6.7 Hz, 6H), 2.25 (d,  $J$  = 8.3 Hz, 6H).

$^{13}\text{C}$  NMR (192.5 MHz;  $\text{CDCl}_3$ ):  $\delta$  147.0 (2C), 142.8 (2C), 141.5 (2C), 139.8 (2C), 137.9 (2C), 136.7 (2C), 133.0, 132.7 (2C), 132.5 (2C), 132.0 (4C), 131.2 (4C), 129.8 (2C), 129.4 (2C), 129.3 (2C), 129.2 (2C), 128.2 (2C), 128.0 (2C), 127.9 (2C), 127.4 (2C), 127.3 (2C), 126.3 (2C), 126.1 (4C), 125.3 (2C), 125.0 (2C), 123.3 (2C), 122.7 (2C), 53.7 (2C), 36.2 (2C), 35.1 (2C), 34.4 (2C).

$^{31}\text{P}$  NMR (121.4 MHz;  $\text{CDCl}_3$ ): 28.88.

## 10. General procedure for allylation of aldehydes

Phosphoramidate catalyst (0.1 eq or 0.05 eq) was dissolved in CH<sub>2</sub>Cl<sub>2</sub> (1.5 mL) under N<sub>2</sub>. To this solution was added allyltributyltin (1.2 eq, 0.54 mmol, 169 µL) and the resulting mixture was cooled to -78 °C (bath temperature). Then fresh distilled SiCl<sub>4</sub> (2 eq, 0.9 mmol, 104 µL) was added followed by the aldehyde (1 eq, 0.45 mmol). The resulting mixture was allowed to stir at -78 °C (bath temperature) for 6 h whereupon the cold reaction mixture was rapidly poured into a stirring solution of 1/1 sat. aq. KF/1.0 M KH<sub>2</sub>PO<sub>4</sub> (5 mL). This biphasic mixture was stirred vigorously for 12 h, then, diluted with CH<sub>2</sub>Cl<sub>2</sub> (10 mL), the layers were separated and aqueous one was washed with CH<sub>2</sub>Cl<sub>2</sub> (3 x 10 mL). The combined organic extracts were dried over Na<sub>2</sub>SO<sub>4</sub>, filtered and the filtrate was concentrated by rotary evaporation under vacuum. The residue was purified by silica gel flash chromatography using hexane/ethyl acetate (9:1, v:v) as eluent with a plug of solid anhydrous KF (15 mm) on the top of the column. The product-containing fractions were combined and the solvent was removed by rotary evaporation under vacuum to yield the desired allylic alcohol.

### 1-phenylbut-3-en-1-ol (8a)

<sup>1</sup>H NMR (300 MHz; CDCl<sub>3</sub>): 7.38-7.27 (m, 5H), 5.89-5.80 (m, 1H), 5.21-5.15 (m, 2H), 4.75 (t, J = 5 Hz, 1H), 2.62-2.46 (m, 2H).

HPLC: t<sub>R</sub> (R)=9.51 min ; t<sub>R</sub> (S)=10.62 min (Chiralcel OD, hexane : *i*-PrOH 95:5, 0.800 mL/min, 15 bar, 210.8 nm). For example: HPLC trace of product (entry 5, table 1).

### 1-(4-chlorophenyl)but-3-en-1-ol (8b)

<sup>1</sup>H NMR (300 MHz; CDCl<sub>3</sub>): δ 7.44 – 7.21 (m, 4H), 5.94-5.66 (m, 1H), 5.20 (d, J = 3.6 Hz, 2H), 4.74 (dd, J = 7.6, 5.2 Hz, 2H), 2.58-2.42 (m, 2H).

HPLC: t<sub>R</sub> (S)=32.04 min ; t<sub>R</sub> (S)=36.7 min (Chiralcel OJ-H, hexane : *i*-PrOH 98:2, 0.800 mL/min, 30 bar, 230 nm).

### 1-(4-methoxyphenyl)but-3-en-1-ol (8c)

<sup>1</sup>H NMR (300 MHz; CDCl<sub>3</sub>):

7.31 (d, J = 8.7 Hz, 2H), 6.91 (d, J = 8.7 Hz, 2H), 5.94-5.72 (m, 1H), 5.26-5.09 (m, 2H), 4.72 (t, J = 6.5 Hz, 1H), 3.83 (s, 3H), 2.55-2.50 (m, 2H).

HPLC: t<sub>R</sub> (R)=25.97 min ; t<sub>R</sub> (S)=30.30 min (Chiralcel OD, hexane : *i*-PrOH 98:2, 0.800 mL/min, 15 bar, 210.8 nm)

**1-phenylbut-3-en-1-ol (8a)**

CHIRALCEL OD Hex:iPrOH 95:5 0.800 ml/min 15.5 bar

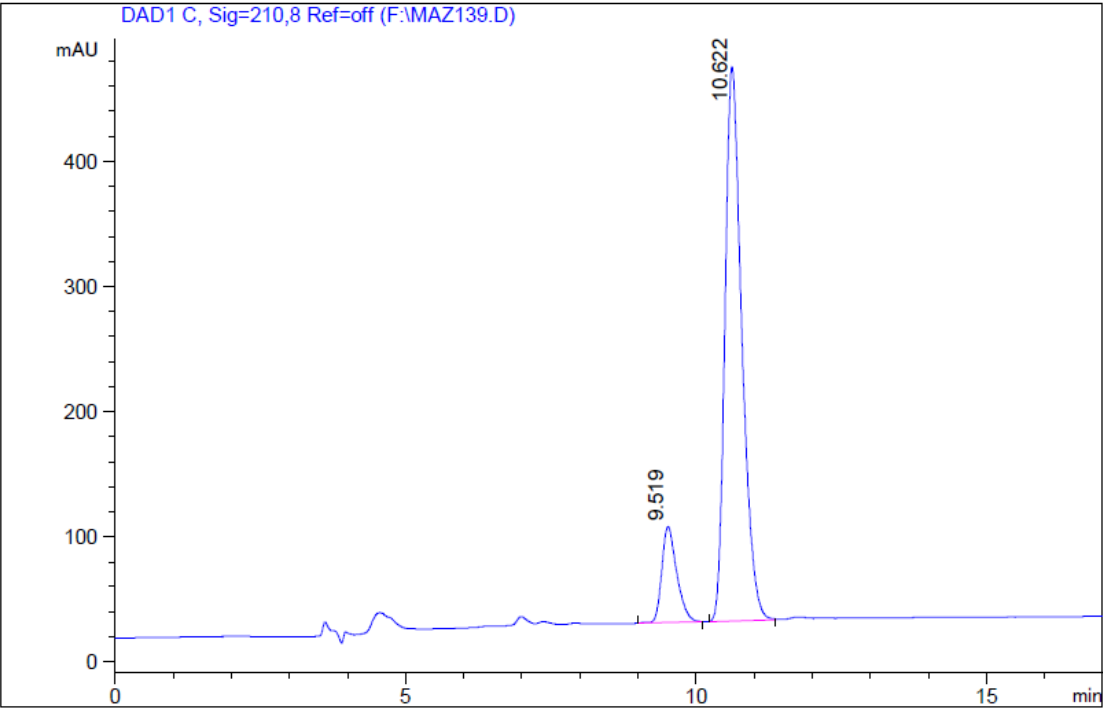

Signal 1: DAD1 C, Sig=210,8 Ref=off

| Peak | RT     | Type | Width | Area     | Area % | Name |
|------|--------|------|-------|----------|--------|------|
| #    | [min]  |      | [min] |          |        |      |
| 1    | 9.519  | BB   | 0.269 | 1373.796 | 13.351 |      |
| 2    | 10.622 | BB   | 0.304 | 8915.929 | 86.649 |      |

1-(4-chlorophenyl)but-3-en-1-ol (8b)

OJ-H Hex:IPA 98:2 0.8 ml/min 30bar

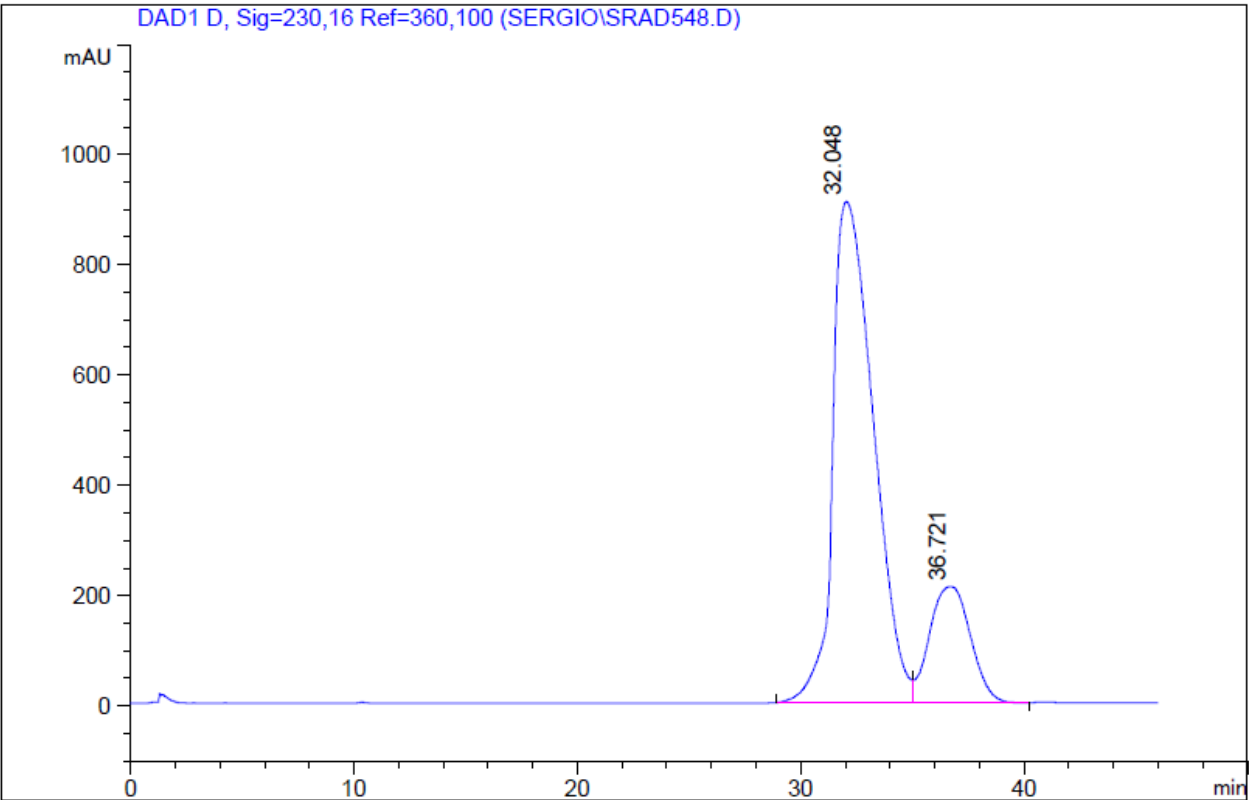

Signal 1: DAD1 D, Sig=230,16 Ref=360,100

| Peak # | RT [min] | Type | Width [min] | Area       | Area % | Name |
|--------|----------|------|-------------|------------|--------|------|
| 1      | 32.048   | BV   | 1.479       | 114761.477 | 81.057 |      |
| 2      | 36.721   | VB   | 2.008       | 26819.705  | 18.943 |      |

1-(4-methoxyphenyl)but-3-en-1-ol (8c)

OD Hex:IPA 98:2 0.8 ml/min 15bar

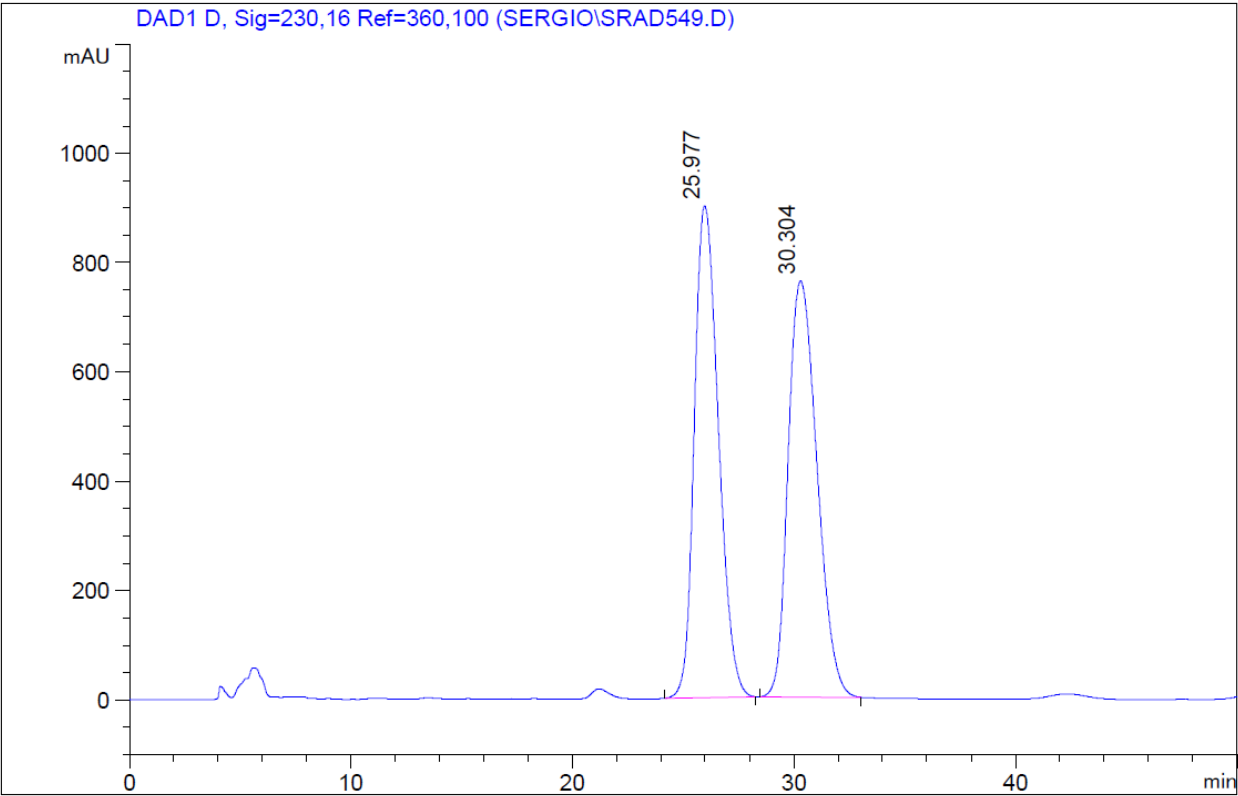

Signal 1: DAD1 D, Sig=230,16 Ref=360,100

| Peak  | RT     | Type | Width | Area      | Area % | Name |  |
|-------|--------|------|-------|-----------|--------|------|--|
| #     | [min]  |      | [min] |           |        |      |  |
| ----- |        |      |       |           |        |      |  |
| 1     | 25.977 | BB   | 1.188 | 68067.445 | 49.661 |      |  |
| 2     | 30.304 | BB   | 1.421 | 68996.727 | 50.339 |      |  |
| ----- |        |      |       |           |        |      |  |

## 11. NMR Studies

### 11.1 Dependence of the NH chemical shifts of free catalyst **7c** on the concentration

A NMR tube was charged with a solution of ligand **7c** in CD<sub>2</sub>Cl<sub>2</sub> at different concentrations. Experiments were conducted operating at 300 MHz at RT. The variation of the chemical shift (<sup>1</sup>H-NMR of the NH groups and <sup>31</sup>P-NMR are reported in table S-1.

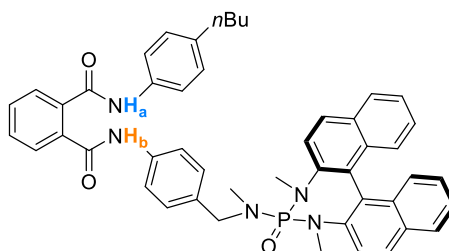

| Entry | [mM]  | H <sub>a</sub> ppm | $\Delta_{(\text{ppm})}\text{H}_a$ | H <sub>b</sub> ppm | $\Delta_{(\text{ppm})}\text{H}_b$ | P (ppm) | $\Delta_{(\text{ppm})}\text{P}$ |
|-------|-------|--------------------|-----------------------------------|--------------------|-----------------------------------|---------|---------------------------------|
| 1     | 30    | 9.4283             | -                                 | 9.1271             | -                                 | 29.1511 | -                               |
| 2     | 15    | 9.2162             | 0.212                             | 8.8893             | 0.238                             | 29.1382 | 0.0129                          |
| 3     | 7.5   | 9.0263             | 0.189                             | 8.6805             | 0.209                             | 29.1319 | 0.0063                          |
| 4     | 3.75  | 8.8767             | 0.149                             | 8.5198             | 0.160                             | 29.1352 | 0.0033                          |
| 5     | 1.875 | 8.7738             | 0.102                             | 8.4088             | 0.111                             | 29.1327 | 0.0035                          |
| 6     | 0.937 | 8.7083             | 0.065                             | 8.3403             | 0.069                             | 29.1252 | 0.0075                          |
| 7     | 0.45  | 8.6816             | 0.027                             | 8.3094             | 0.031                             | 29.1231 | 0.0021                          |

Table S-1

$\Delta(\text{ppm})$  between 3.75 mM and 1.875 mM is about 0.1 ppm. So 3.75 mM was selected as final concentration for further experiments.

### 11.2 NMR Studies of catalyst **7c** in the presence of SiCl<sub>4</sub> at RT

Under nitrogen, a NMR tube was charged with a solution of catalyst **7c** (2 eq, 0.03 mmol) dissolved in 0.4 mL of CD<sub>2</sub>Cl<sub>2</sub> followed by a solution of SiCl<sub>4</sub> (1 eq, 0.015 mmol) diluted in 0.4 mL of CD<sub>2</sub>Cl<sub>2</sub>. NMR acquisition at RT showed the formation of compound **9**, that was isolated by chromatographic purification using ethyl acetate/methanol (99:1 v:v) as eluent.

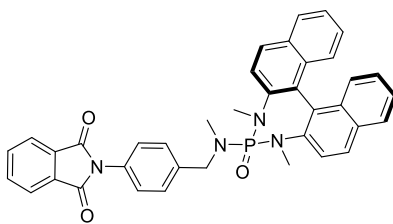

$^1\text{H}$  NMR (300 MHz;  $\text{CDCl}_3$ ):  $\delta$  7.99-7.94 (m, 3H), 7.87 (d,  $J$  = 8.5 Hz, 2H), 7.81-7.76 (m, 3H), 7.53 (d,  $J$  = 8.3 Hz, 2H), 7.46 (d,  $J$  = 8.4 Hz, 2H), 7.40-7.33 (m, 4H), 7.22-7.18 (m, 2H), 7.15-7.12 (m, 1H), 7.05 (d,  $J$  = 8.3 Hz, 1H), 4.40 (dd,  $J$  = 14.7, 7.5 Hz, 1H), 4.17 (dd,  $J$  = 14.1, 7.6 Hz, 1H), 3.08 (d,  $J$  = 9.1 Hz, 6H), 2.22 (d,  $J$  = 8.9 Hz, 3H).

$^{31}\text{P}$  NMR (121.4 MHz;  $\text{CDCl}_3$ ): 29.03.

### 11.3 NMR Studies of catalyst 7c in the presence of $\text{SiCl}_4$ at $-50^\circ\text{C}$

Under nitrogen, a NMR tube was charged with a cooled solution of catalyst **7c** (2 eq, 0.03 mmol) dissolved in 0.4 mL of  $\text{CD}_2\text{Cl}_2$  followed by a cooled solution of  $\text{SiCl}_4$  (1 eq, 0.015 mmol) diluted in 0.4 mL of  $\text{CD}_2\text{Cl}_2$ . NMR acquisitions were performed at  $-50^\circ\text{C}$ .

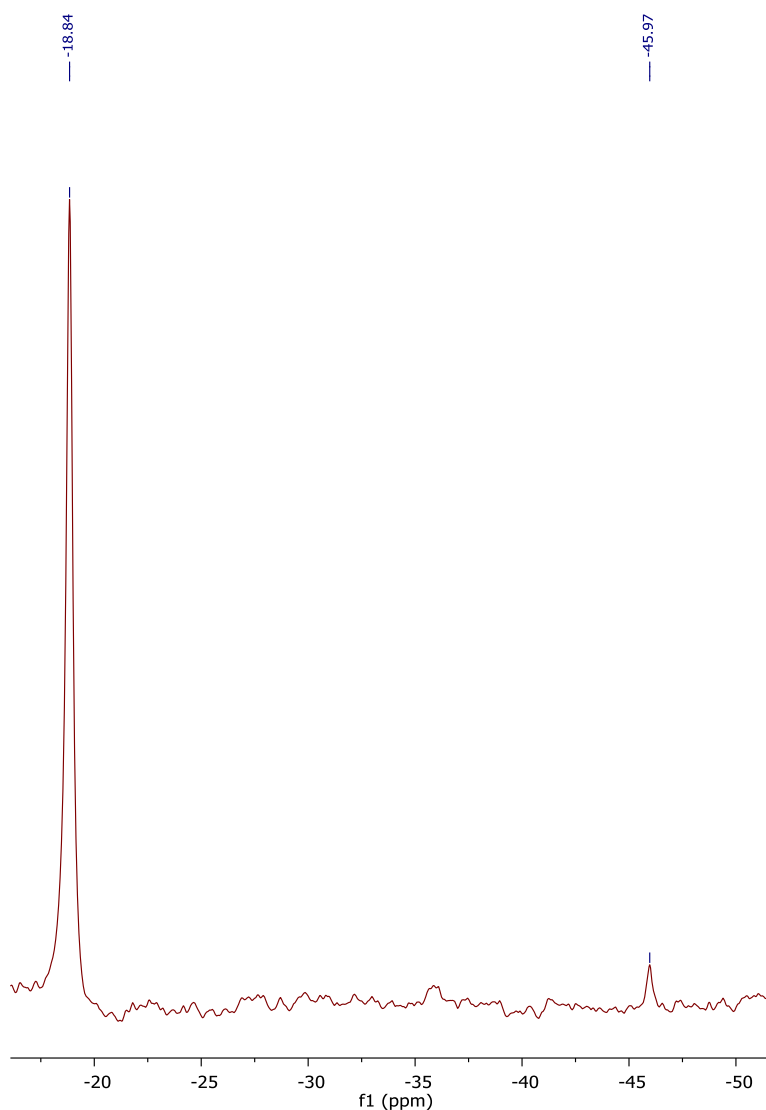

BBI;  $^{29}\text{Si}$ ; zgig; 3.75 mM; 223 K (-50°C);  $\text{CD}_2\text{Cl}_2$

#### 11.4 Investigation on solubility of $\text{Py}_2\text{SiCl}_4$ complexes

In order to investigate the complexation of substituted pyridines with  $\text{SiCl}_4$ , preliminary studies on the solubility of the complexes were conducted. A NMR tube was charged with a solution of 4-substituted pyridine (2 eq) and  $\text{SiCl}_4$  (1 eq) in  $\text{CD}_2\text{Cl}_2$  (final concentration in  $\text{SiCl}_4$  0.3 M, 0.15 M or 0.075 M) under nitrogen. The reaction was allowed to stay for 15 min, then the formation of precipitate was investigated by naked eye.

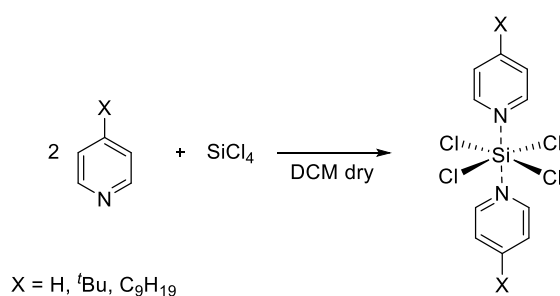

|       | $[\text{Py}_2\text{SiCl}_4]$ |       |         | $[(4\text{-}^t\text{Bu-Py})_2\text{SiCl}_4]$ |       |         | $[(4\text{-C}_9\text{H}_{19}\text{-Py})_2\text{SiCl}_4]$ |       |         |
|-------|------------------------------|-------|---------|----------------------------------------------|-------|---------|----------------------------------------------------------|-------|---------|
|       | 0.3 M                        | 0.15M | 0.075 M | 0.3 M                                        | 0.15M | 0.075 M | 0.3 M                                                    | 0.15M | 0.075 M |
| 25°C  | ■                            | ■     | ■       | ■                                            | ■     | ■       | ■                                                        | ■     | ■       |
| -20°C | ■                            | ■     | ■       | ■                                            | ■     | ■       | ■                                                        | ■     | ■       |
| -50°C | ■                            | ■     | ■       | ■                                            | ■     | ■       | ■                                                        | ■     | ■       |
| -78°C | ■                            | ■     | ■       | ■                                            | ■     | ■       | ■                                                        | ■     | ■       |

■ Precipitate formed. ■ Cloudy solution. ■ No precipitate observed.

$(4\text{-C}_9\text{H}_{19}\text{-Py})_2\text{SiCl}_4$  was selected for  $^{29}\text{Si}$  NMR investigations

BBI;  $^{29}\text{Si}$ ; zgig;  $[(4\text{-C}_9\text{H}_{19}\text{-Py})_2\text{SiCl}_4]$ ; 0.075M; 210 K (-63°C);  $\text{CD}_2\text{Cl}_2$

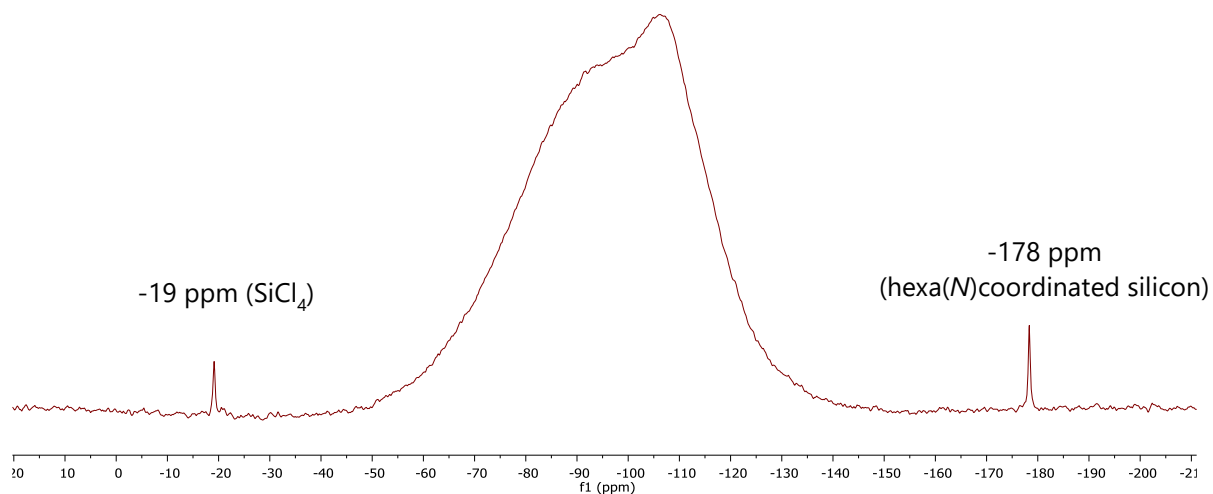

## REFERENCES

1. Denmark, S. E.; Rossi, S.; Webster, M. P.; Wang, H., Catalytic, enantioselective sulfenylation of ketone-derived enoxysilanes. *J Am Chem Soc* **2014**, 136, (37), 13016-28.
2. Pignataro, L.; Carboni, S.; Civera, M.; Colombo, R.; Piarulli, U.; Gennari, C., PhthalaPhos: chiral supramolecular ligands for enantioselective rhodium-catalyzed hydrogenation reactions. *Angew. Chem. Int. Ed* **2010**, 49, (37), 6633-6637.
3. Nojima, Y.; Nonoyama, M.; Nakajima, K.; Cyclopalladation of N-(p-thiotoluoyl)pyrrolidine and - piperidine *Polyhedron* **1996**, 15, 3795-3809.



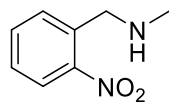

3a

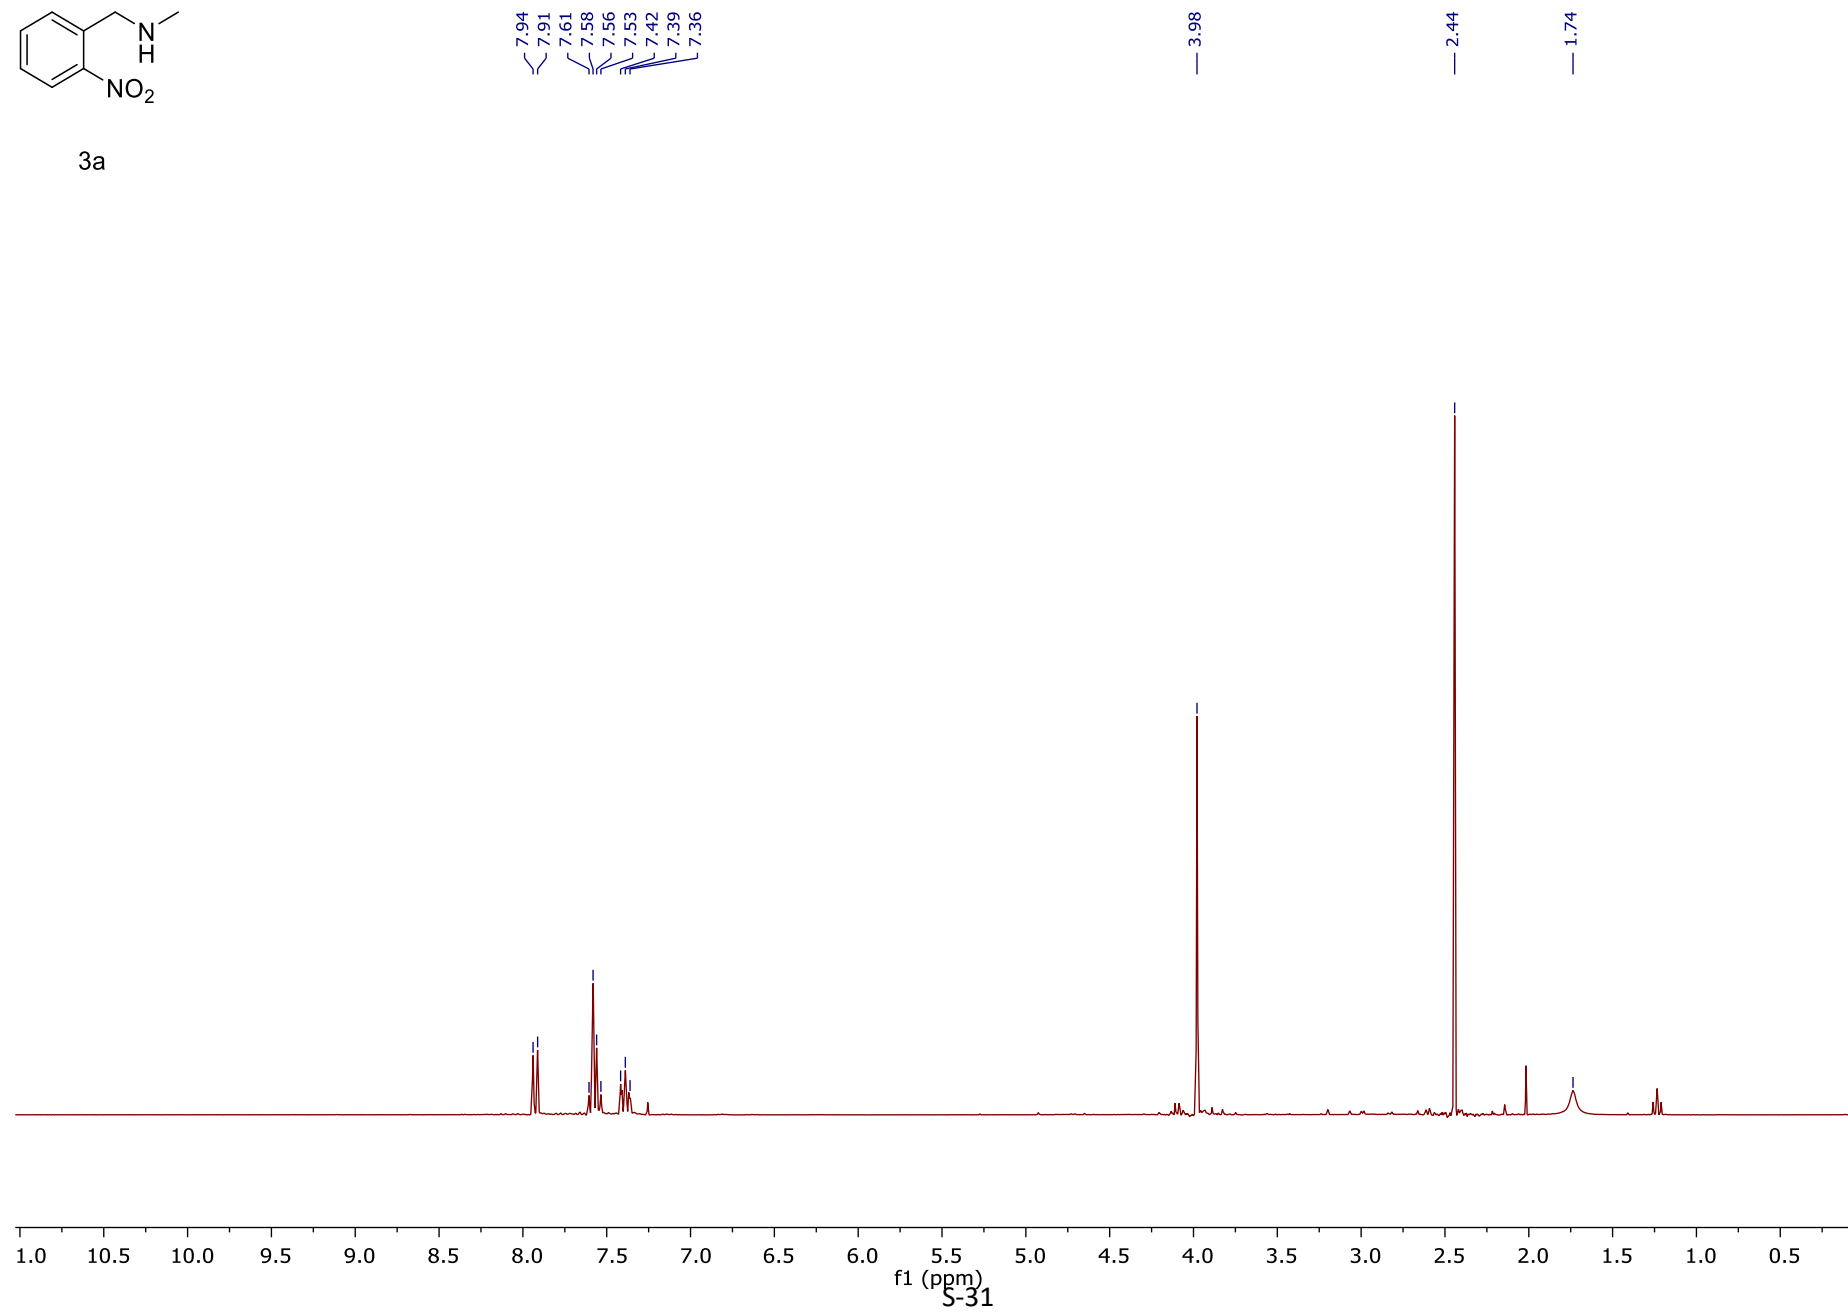

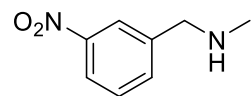

3b

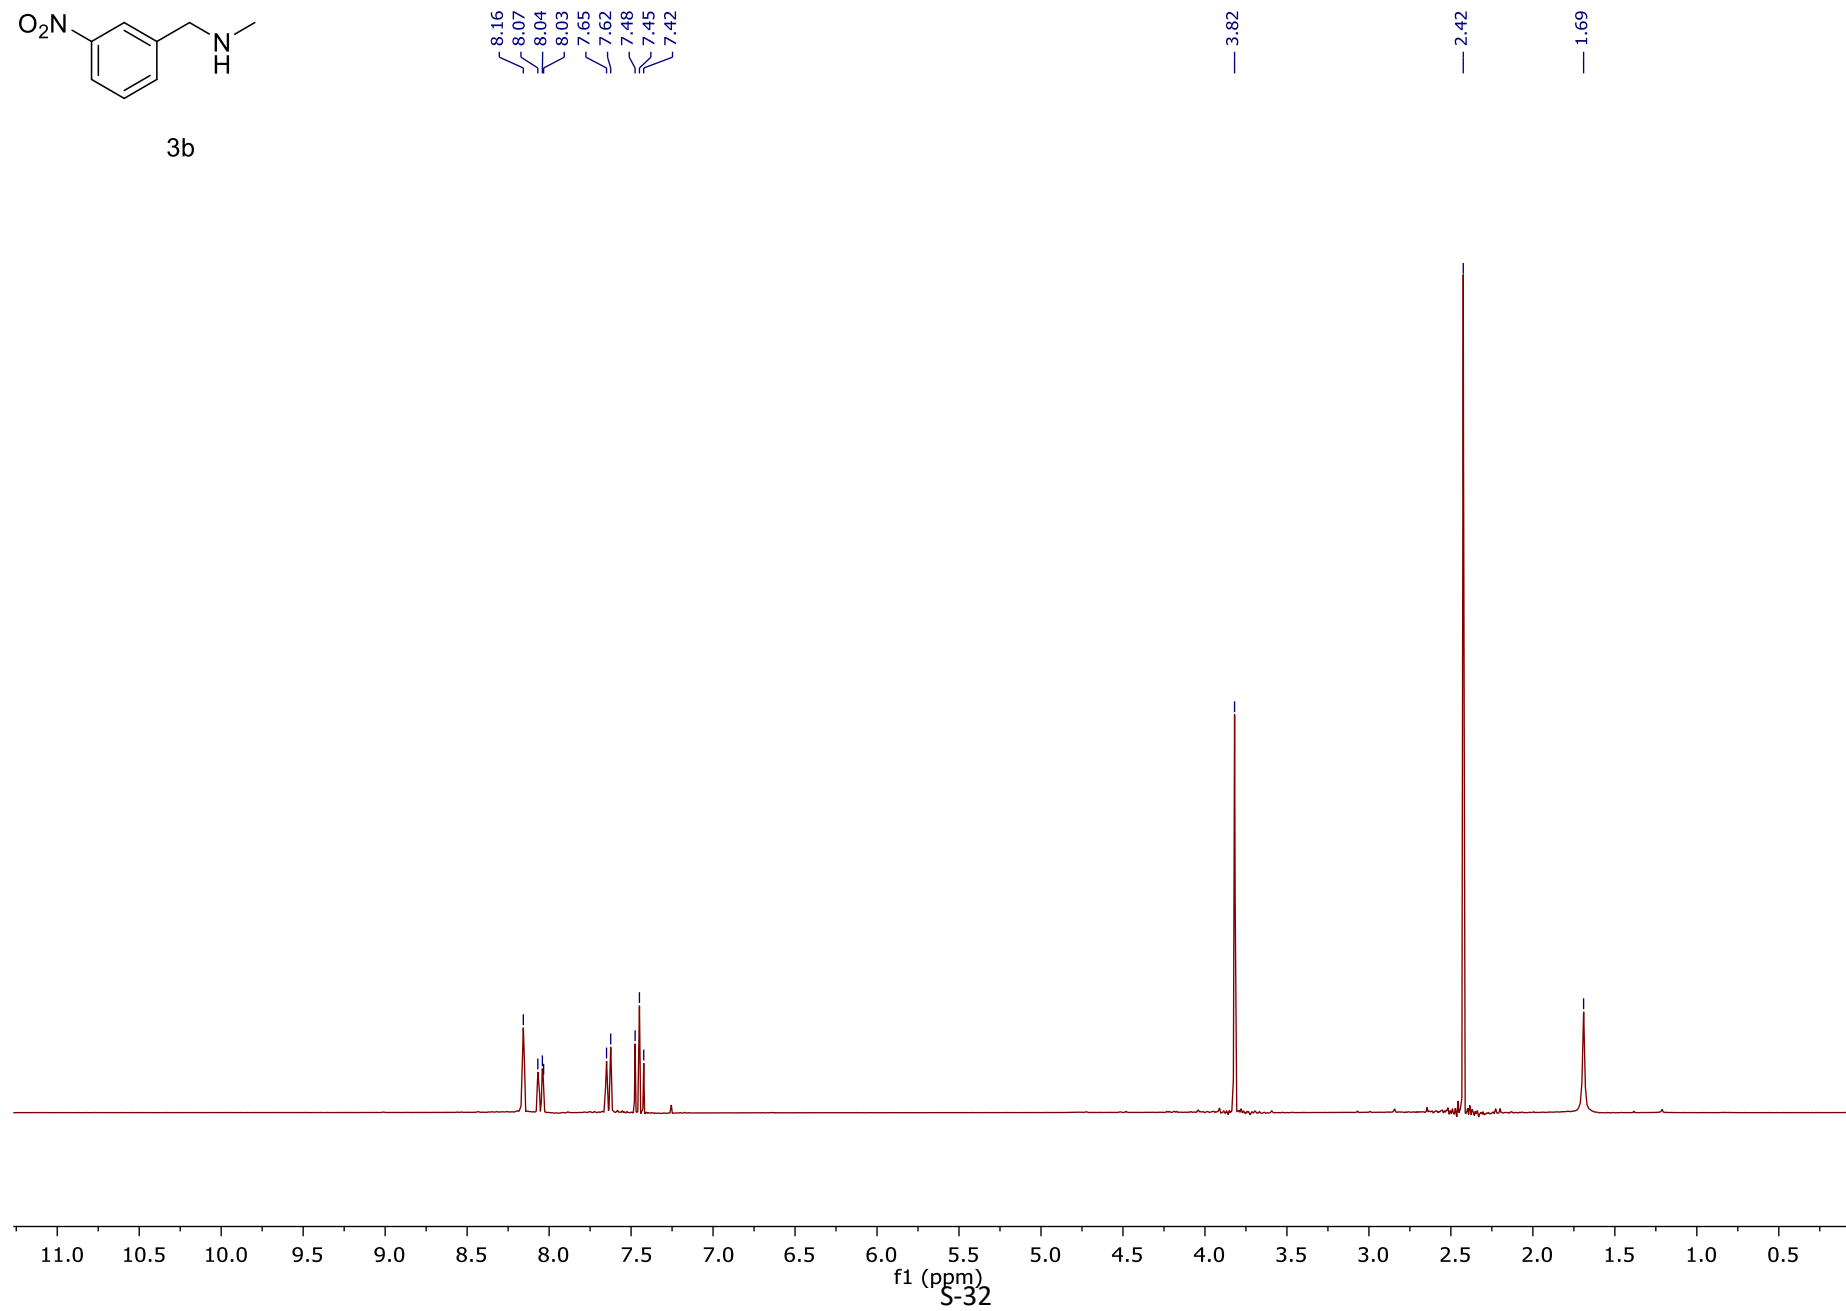

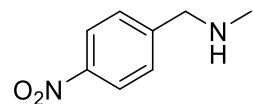

3c

8.15  
8.12  
8.12

7.48  
7.45

3.83

2.43

1.50

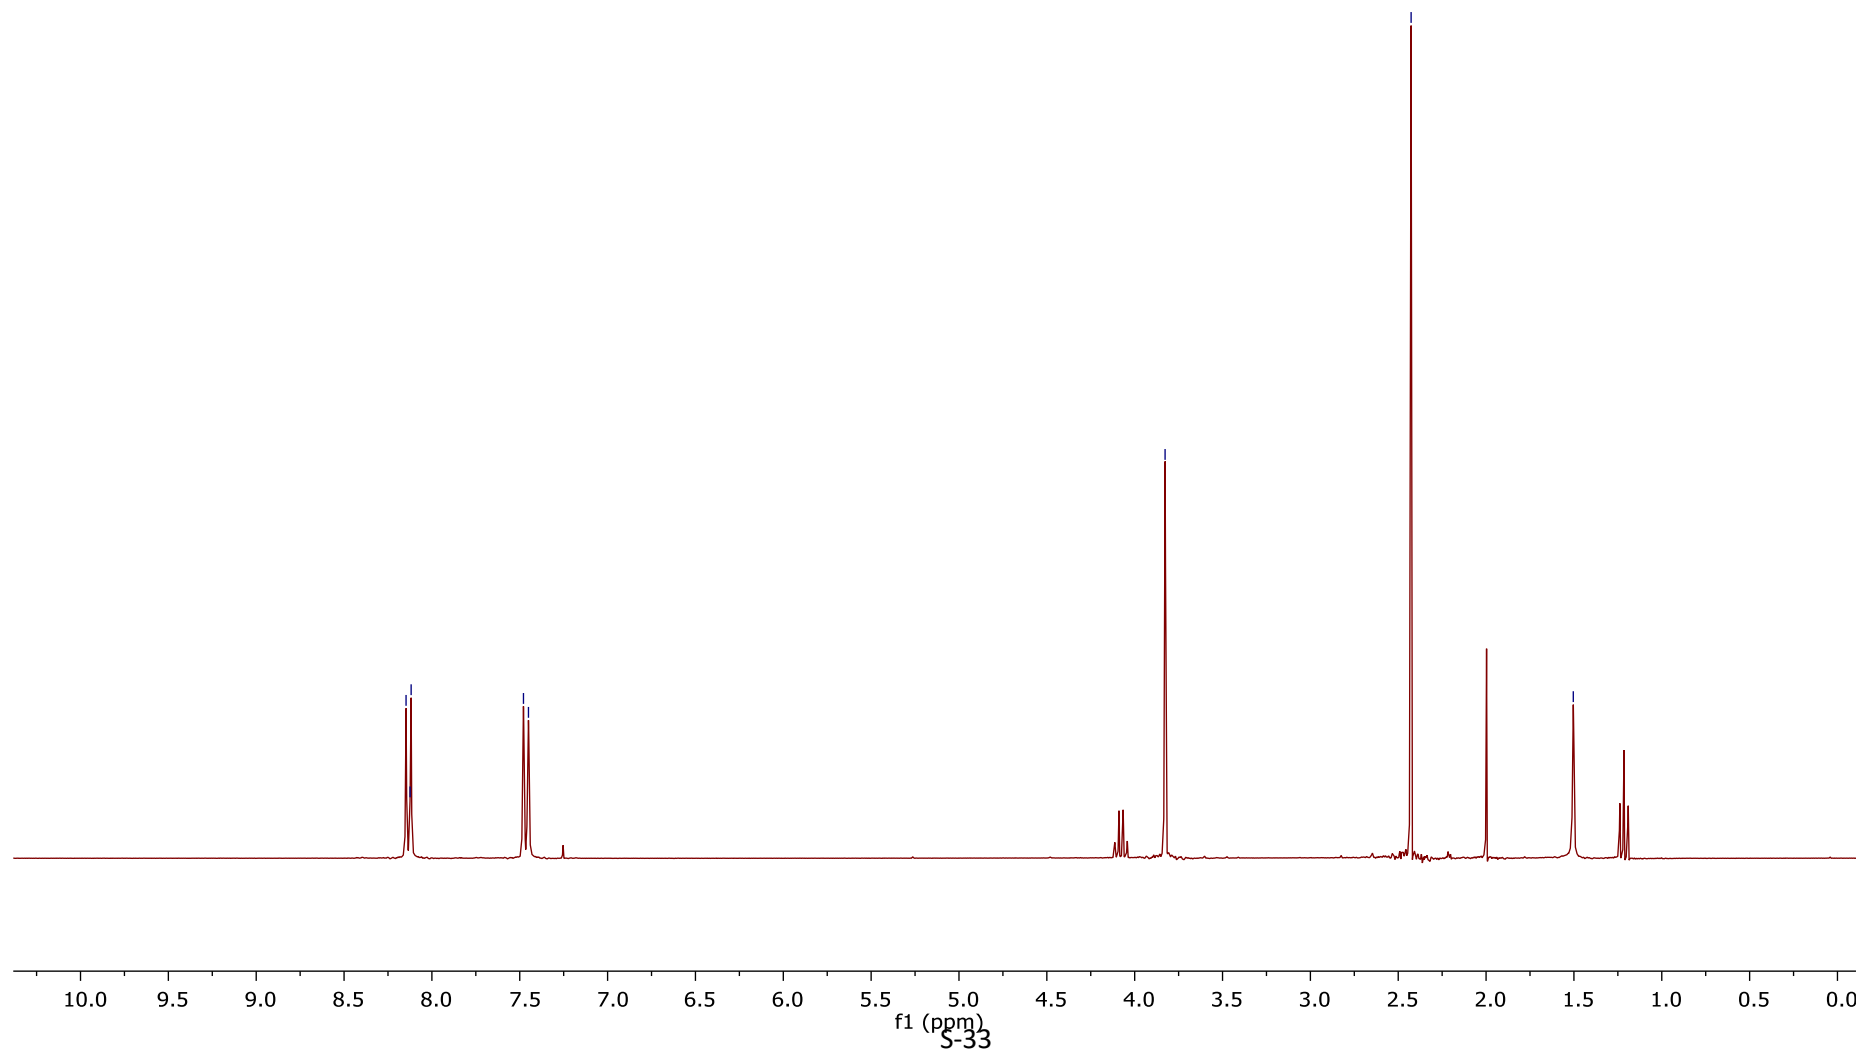

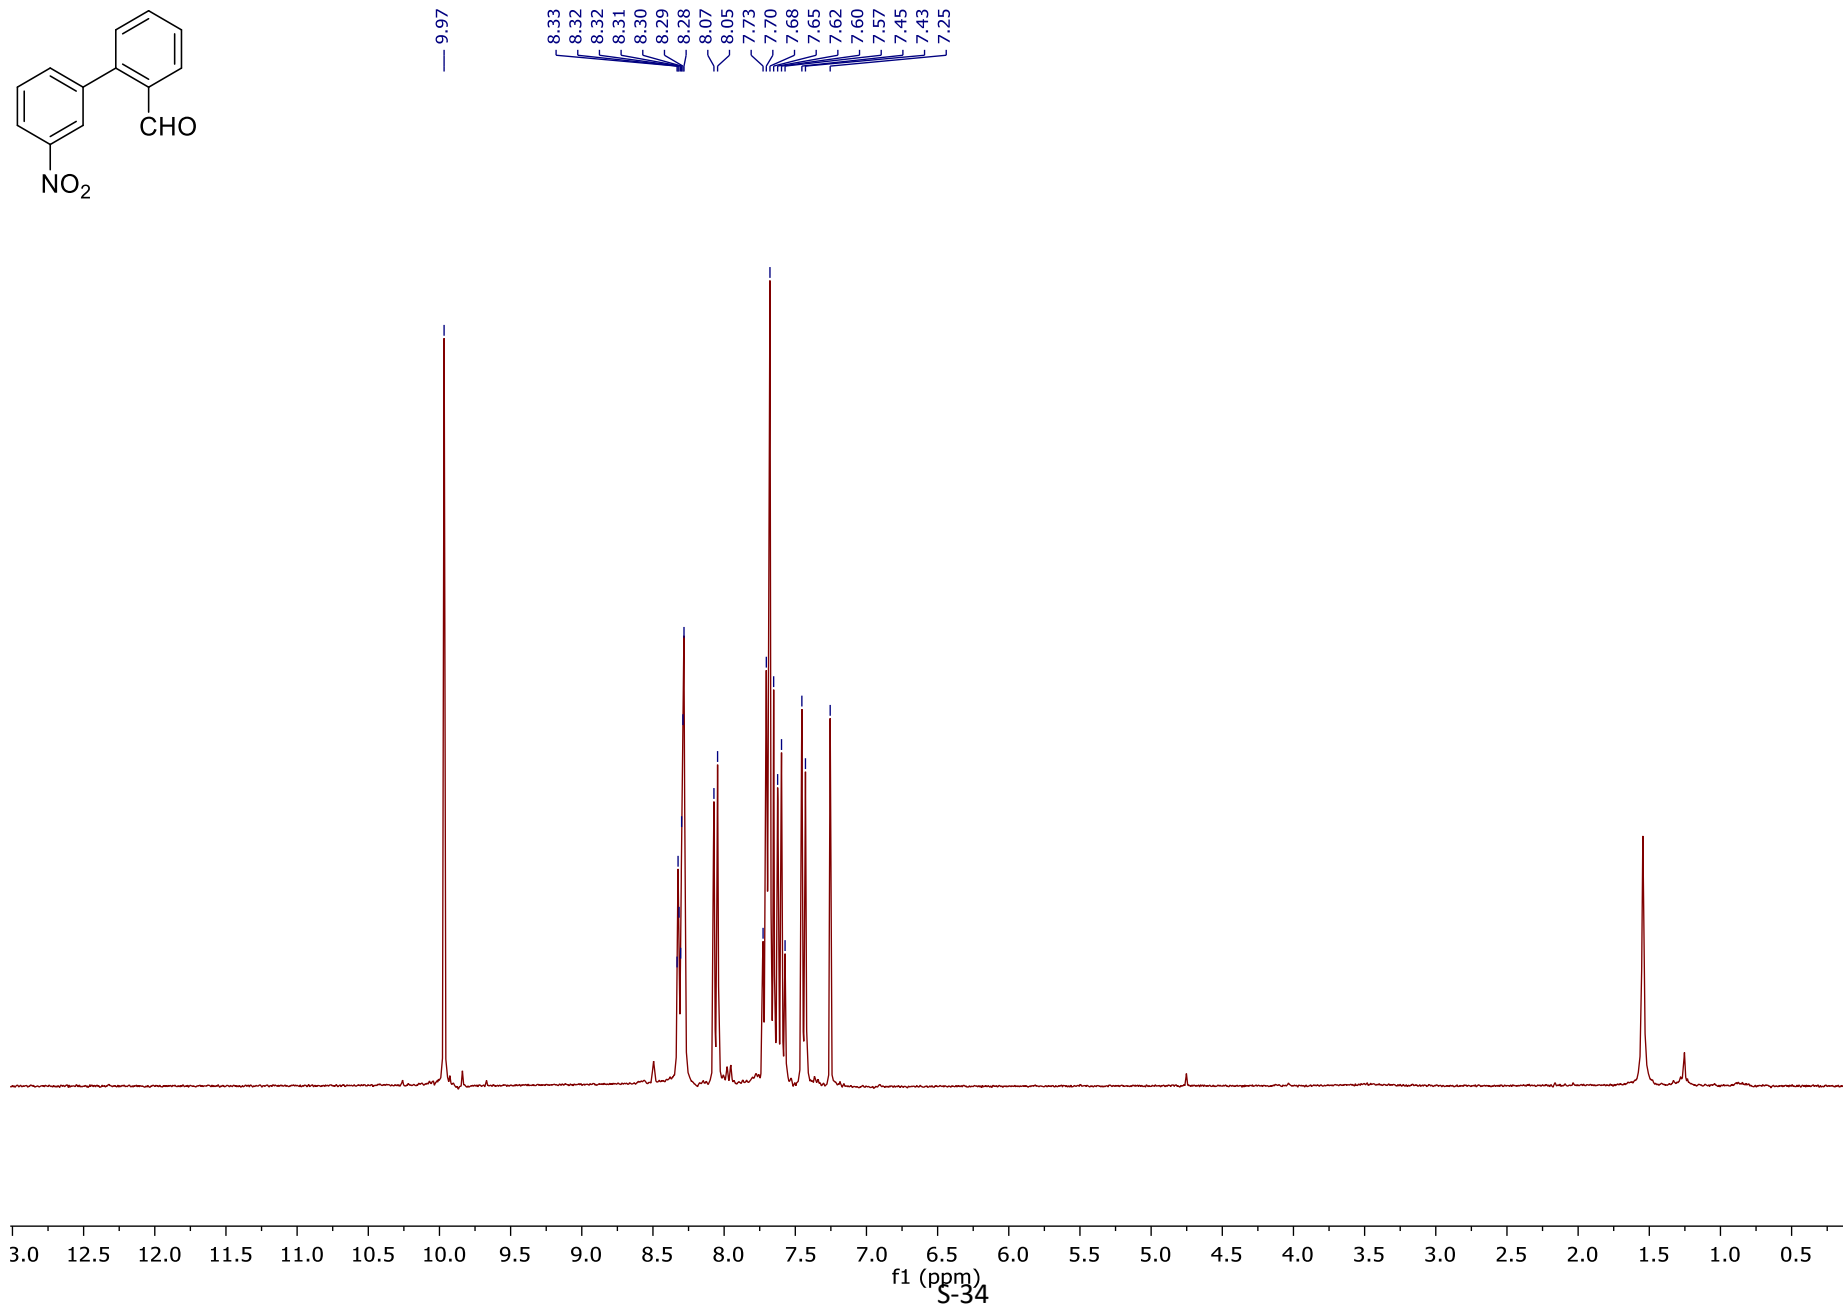

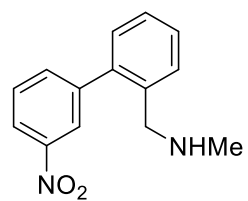

3f

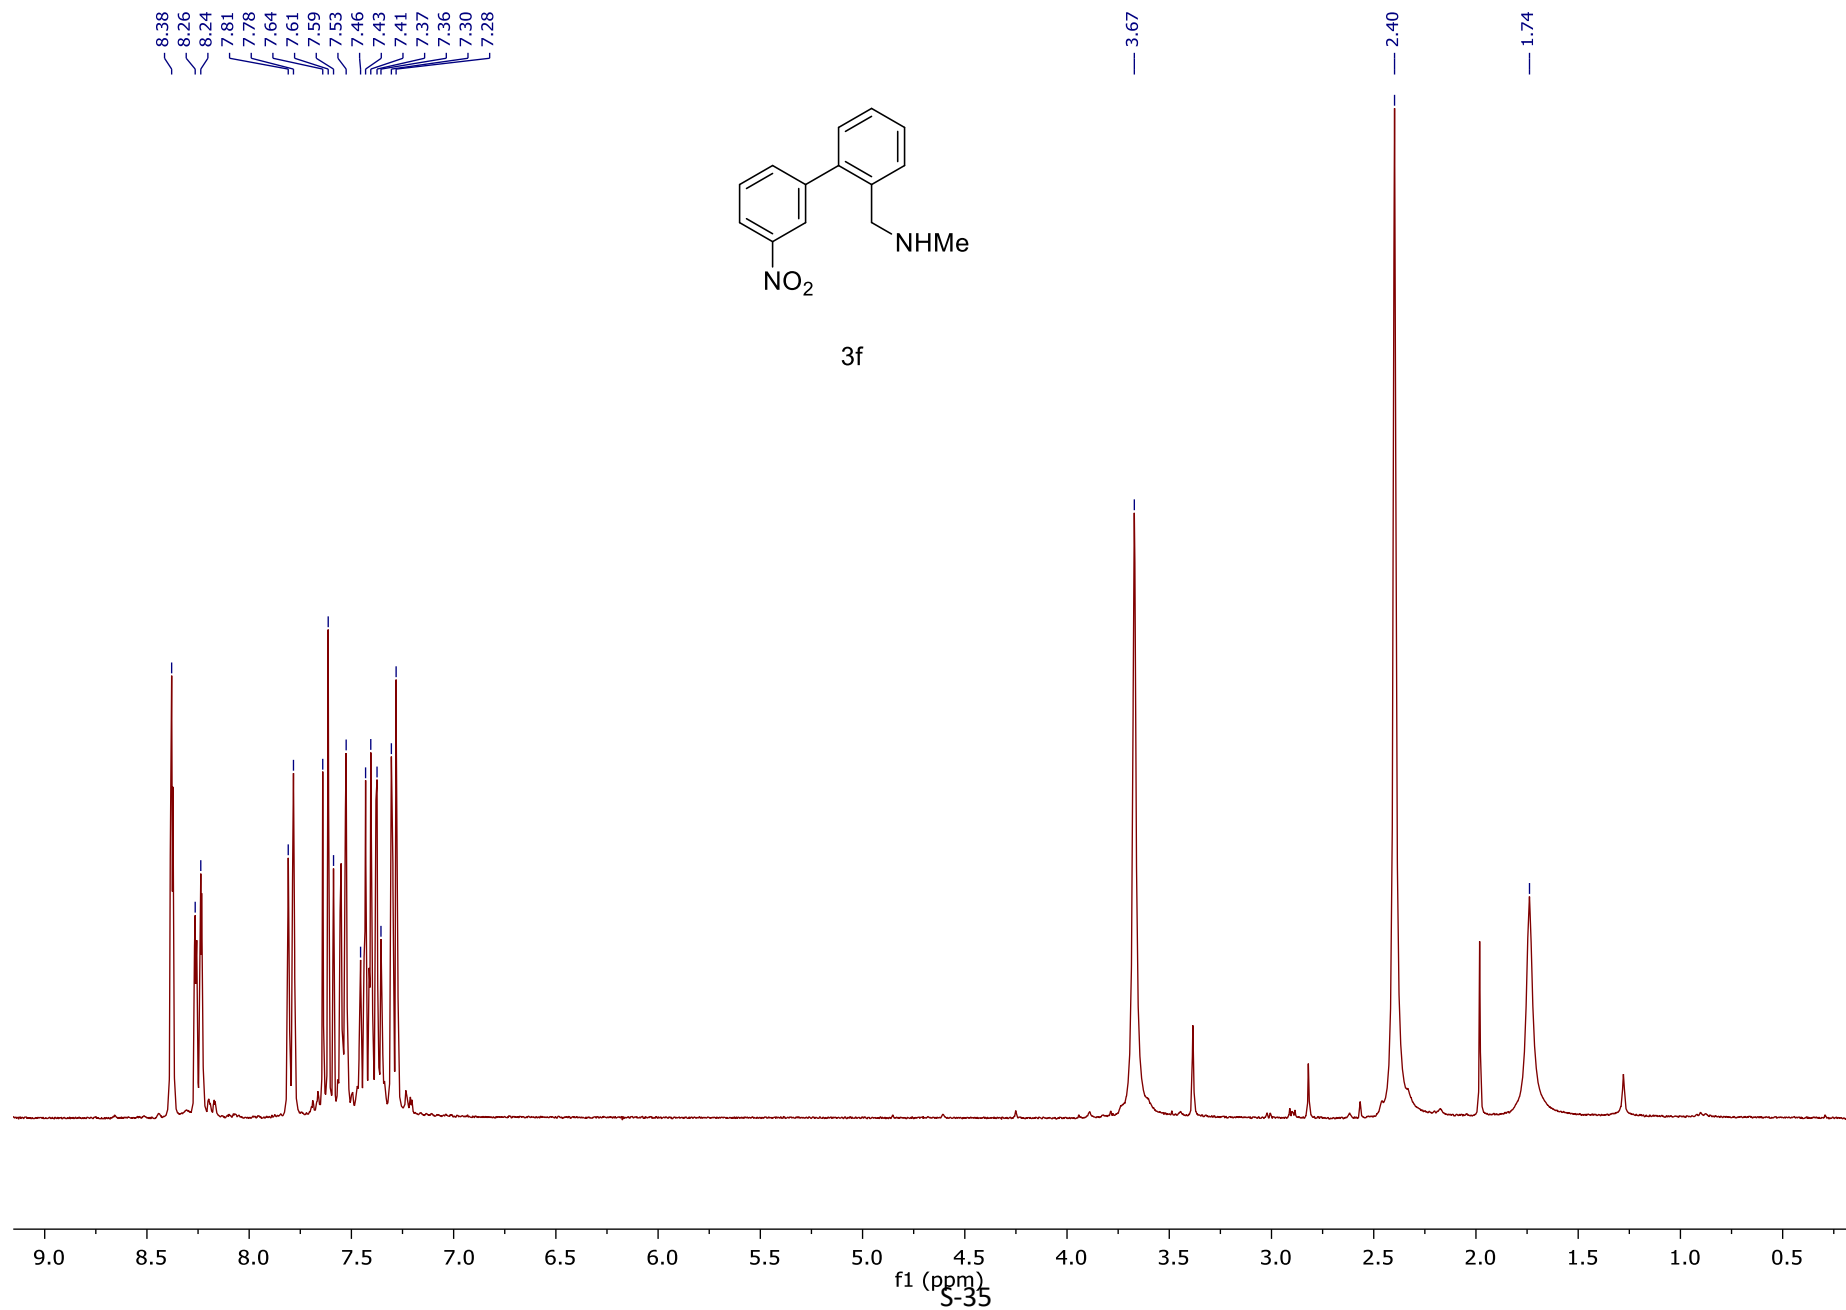

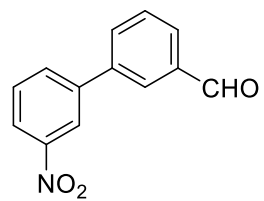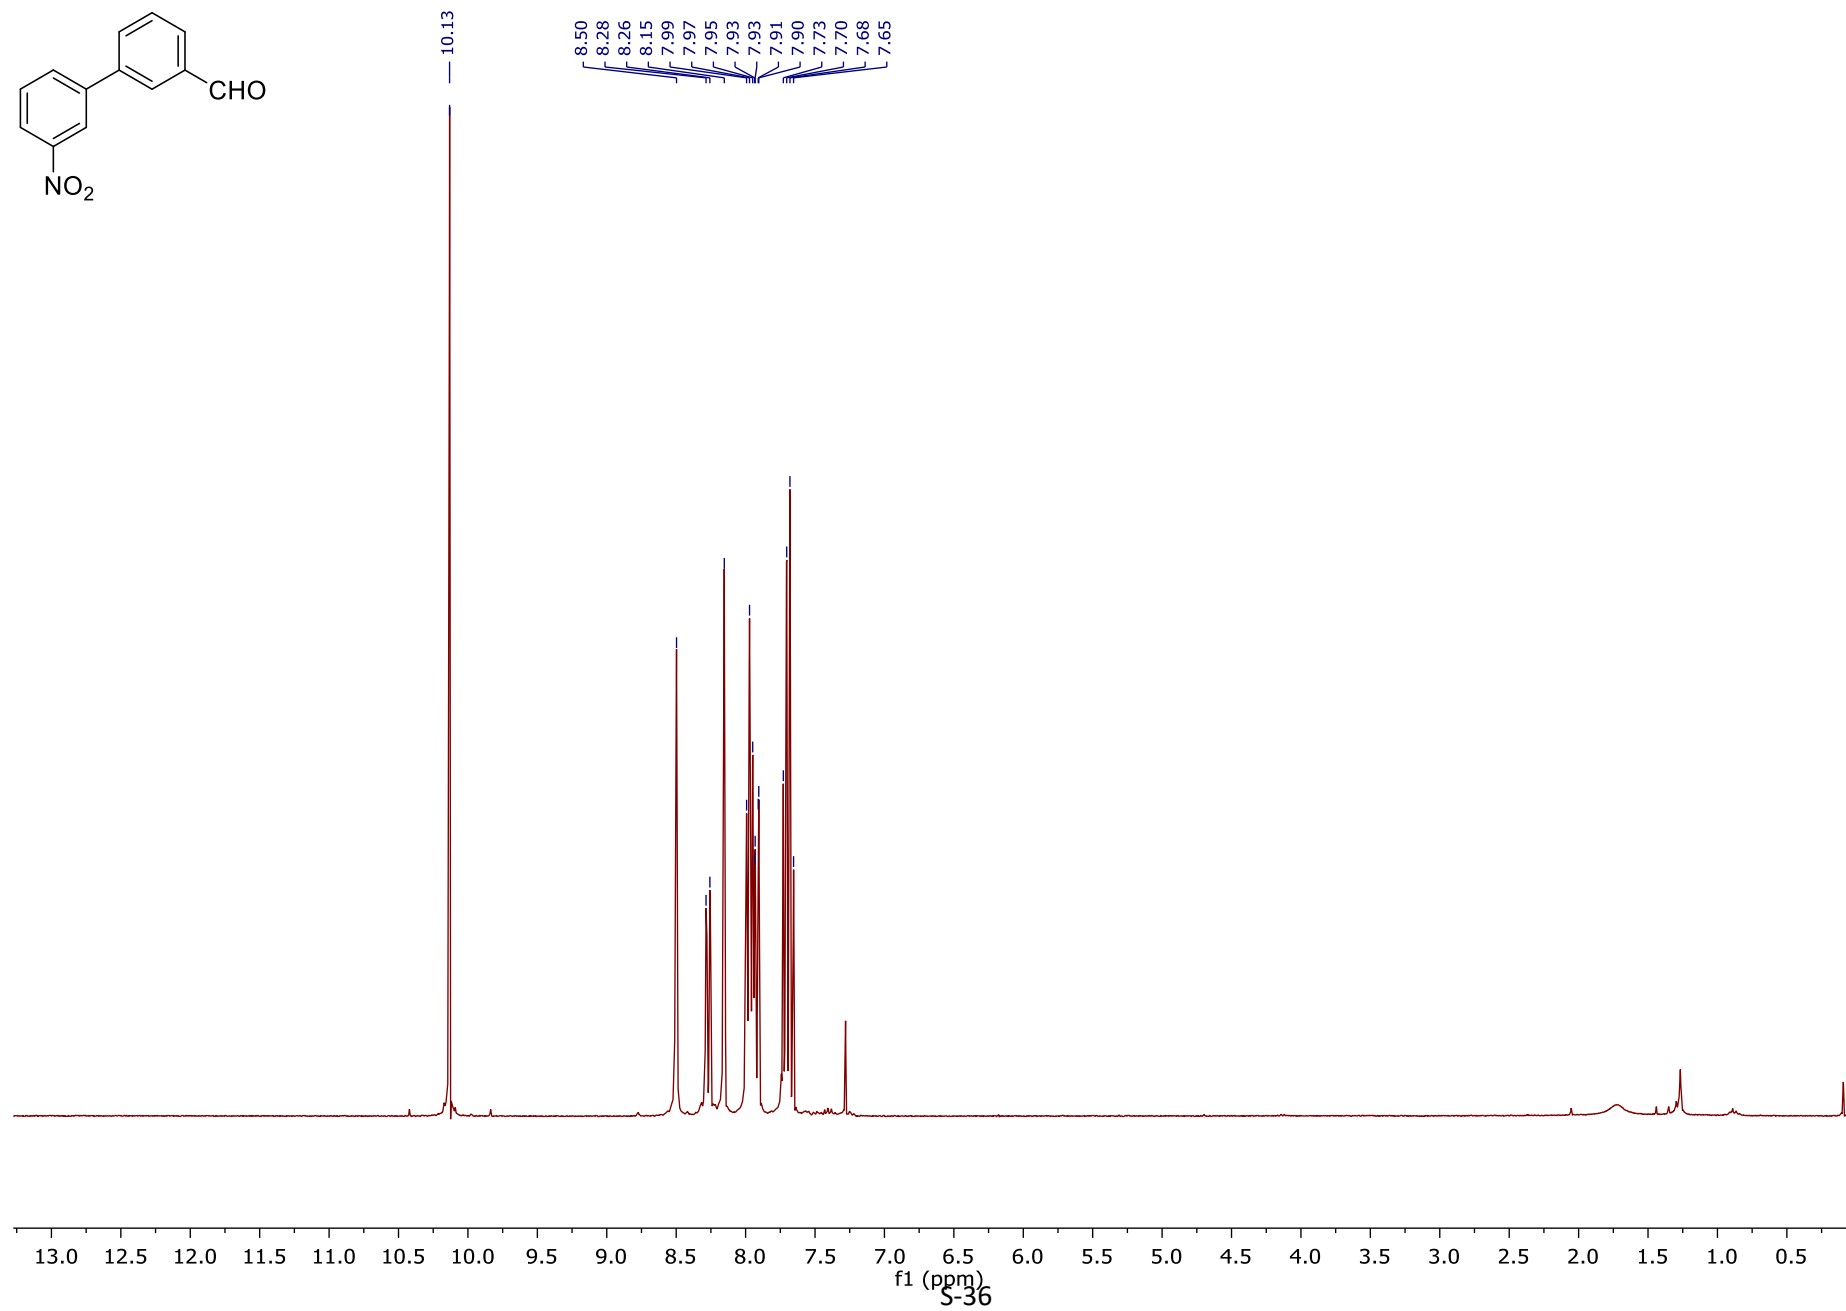

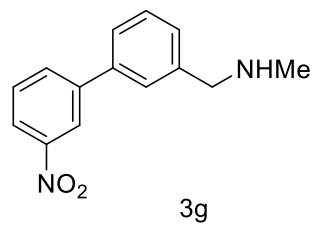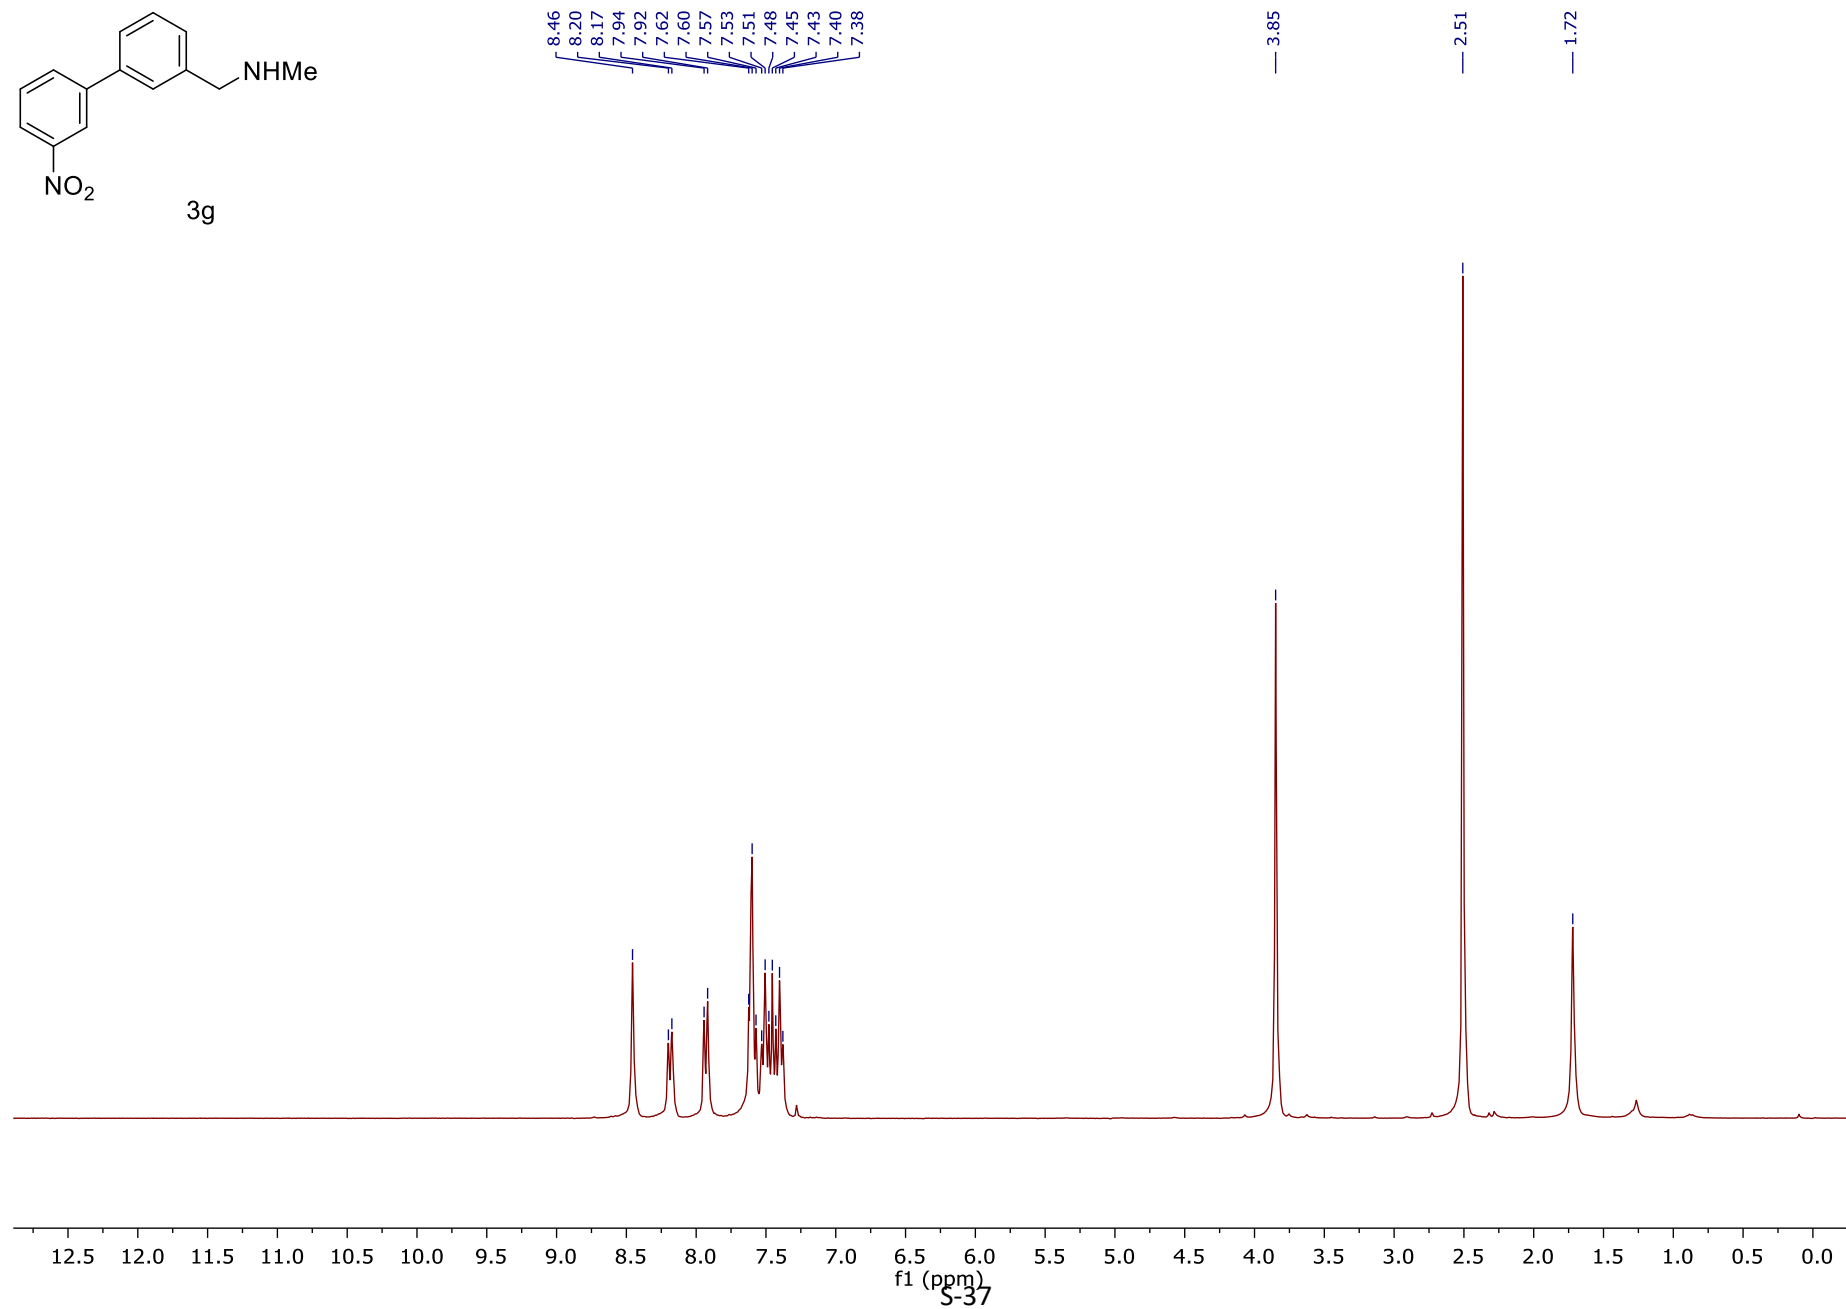

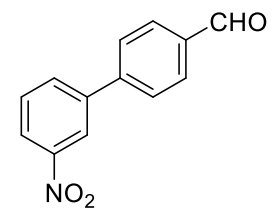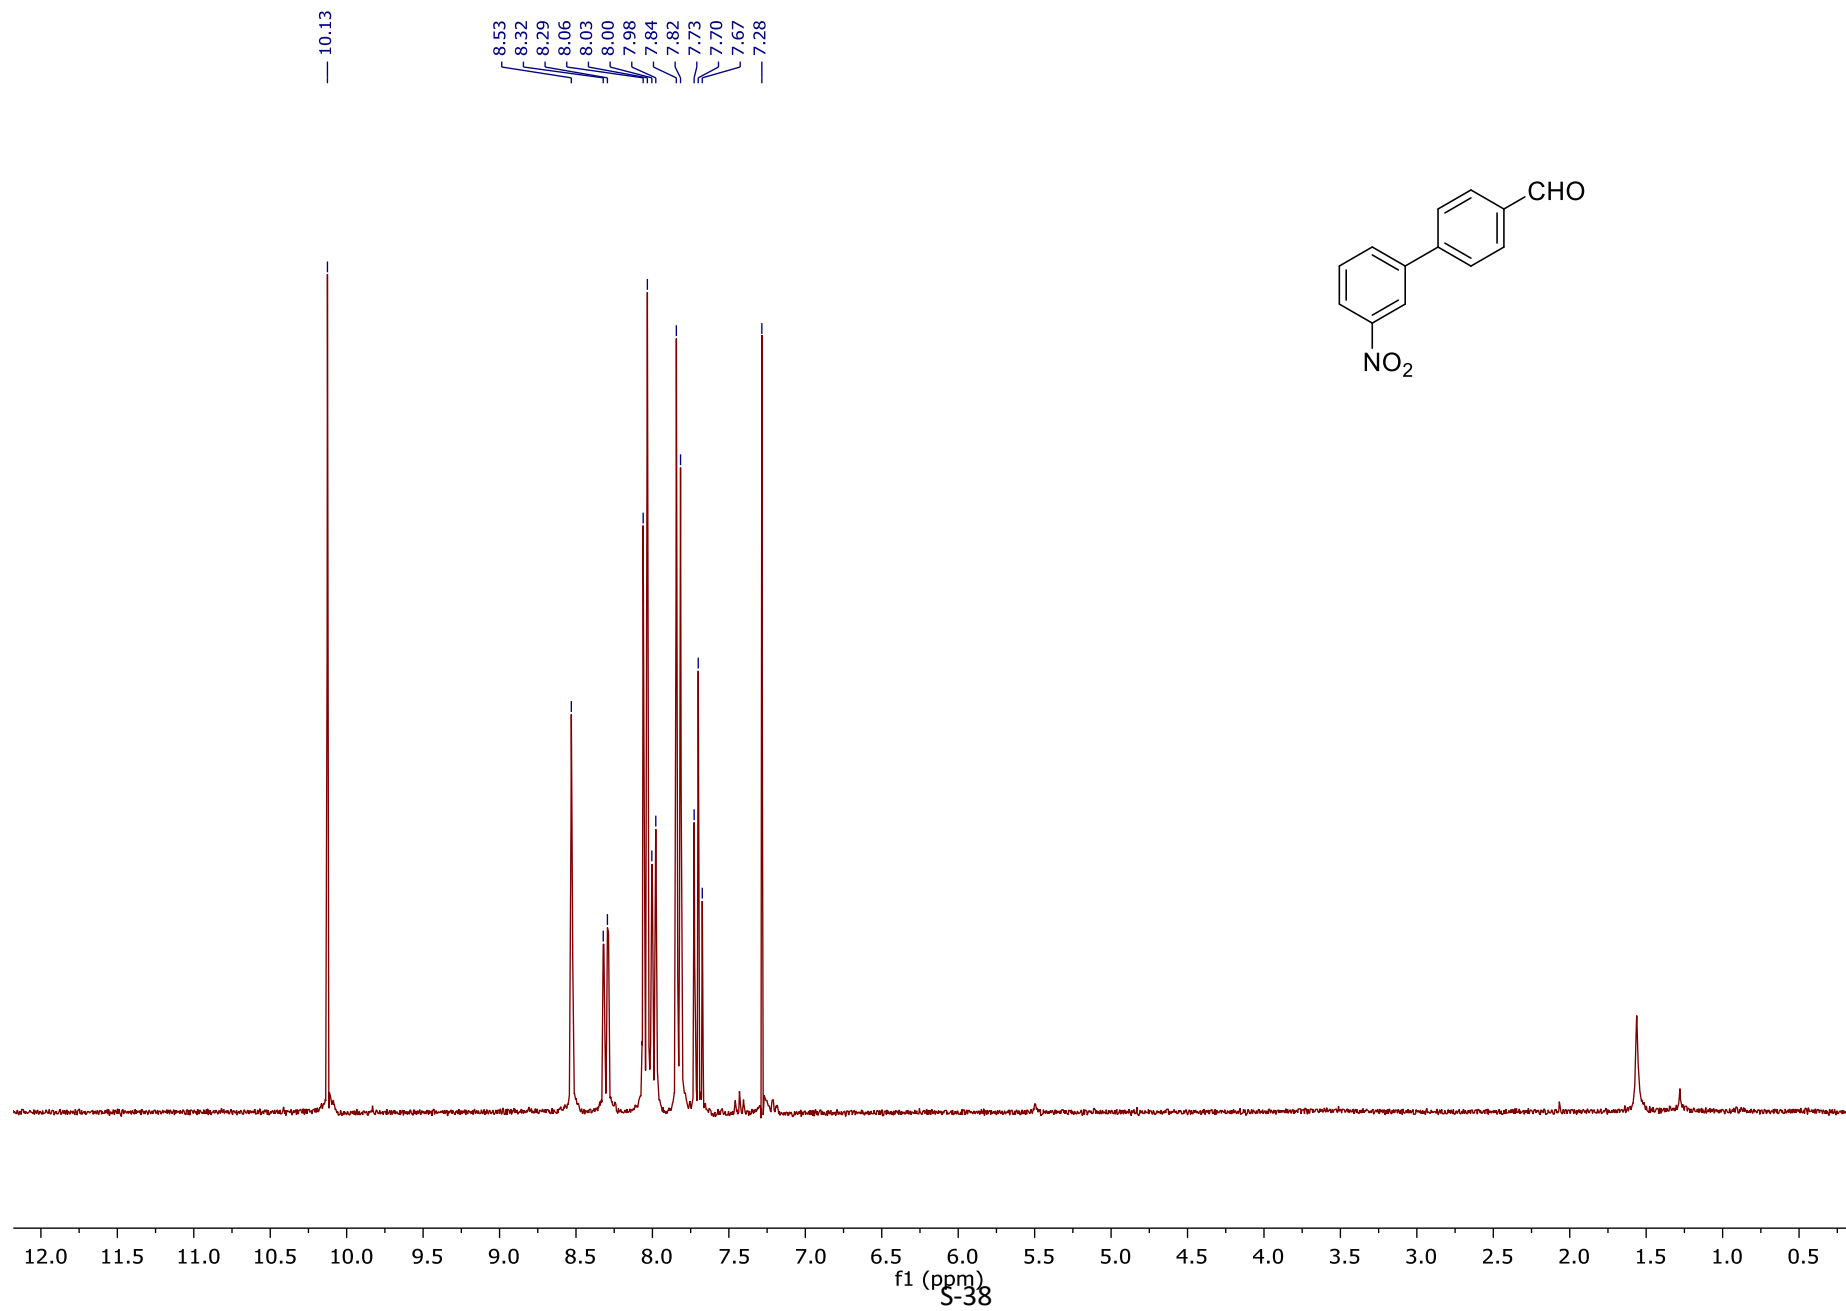

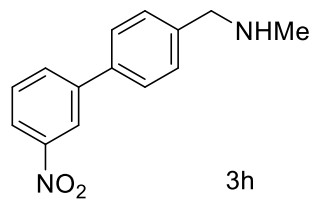

8.42  
8.18  
8.15  
7.91  
7.88  
7.60  
7.57  
7.47  
7.45

3.84

2.50  
2.43

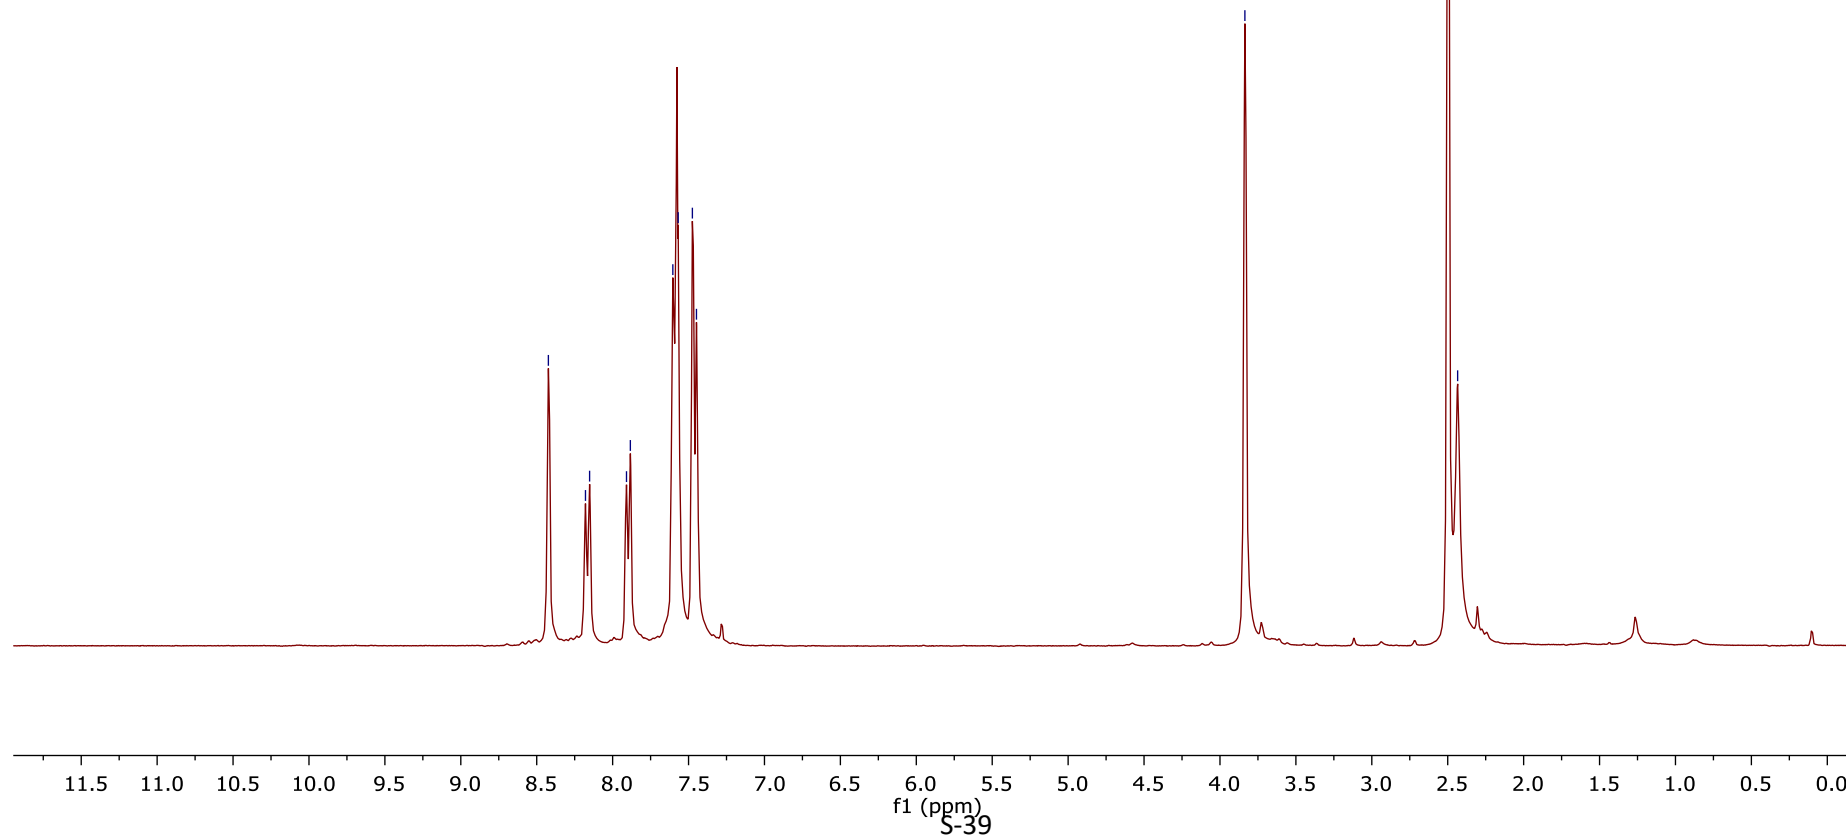

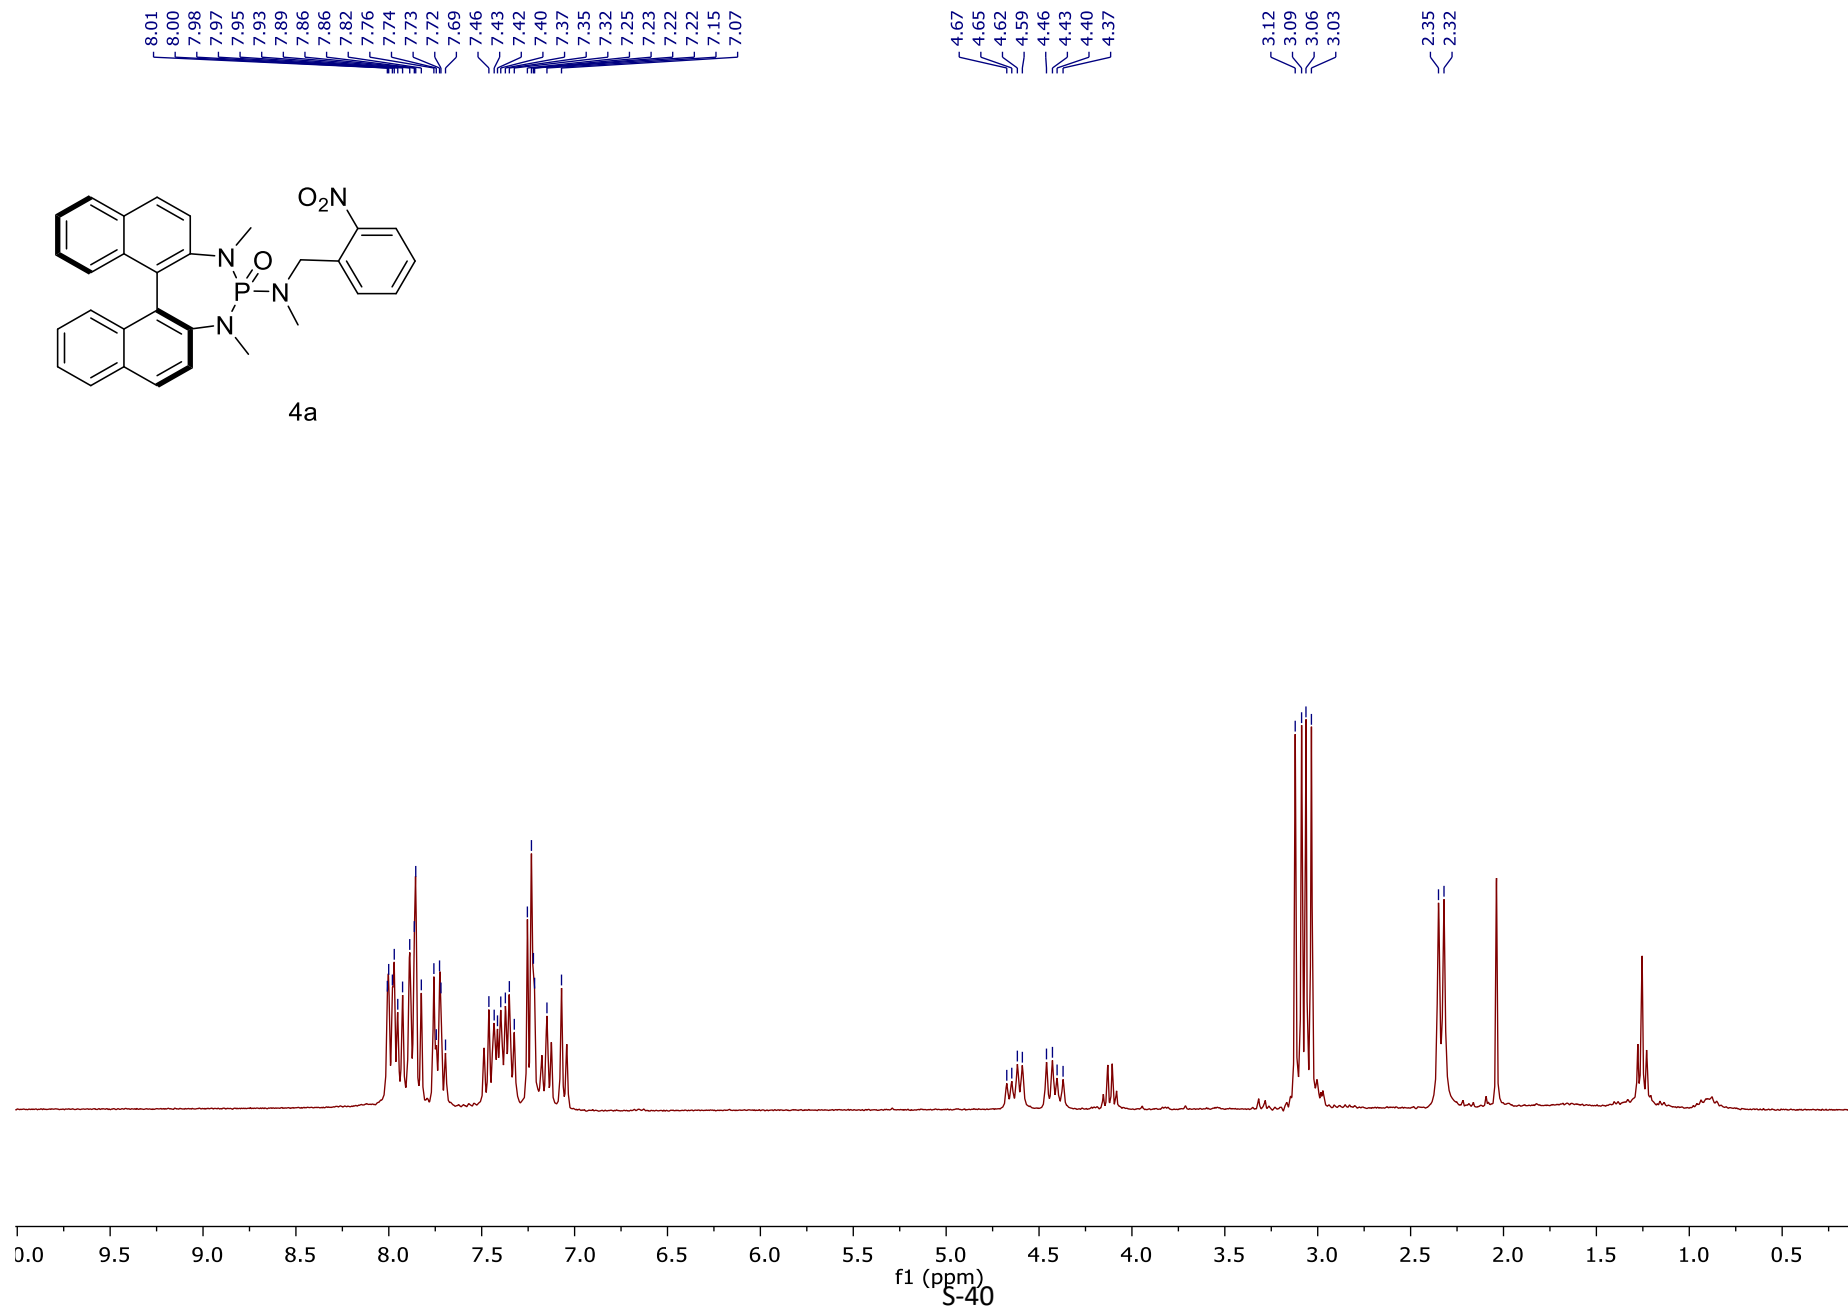

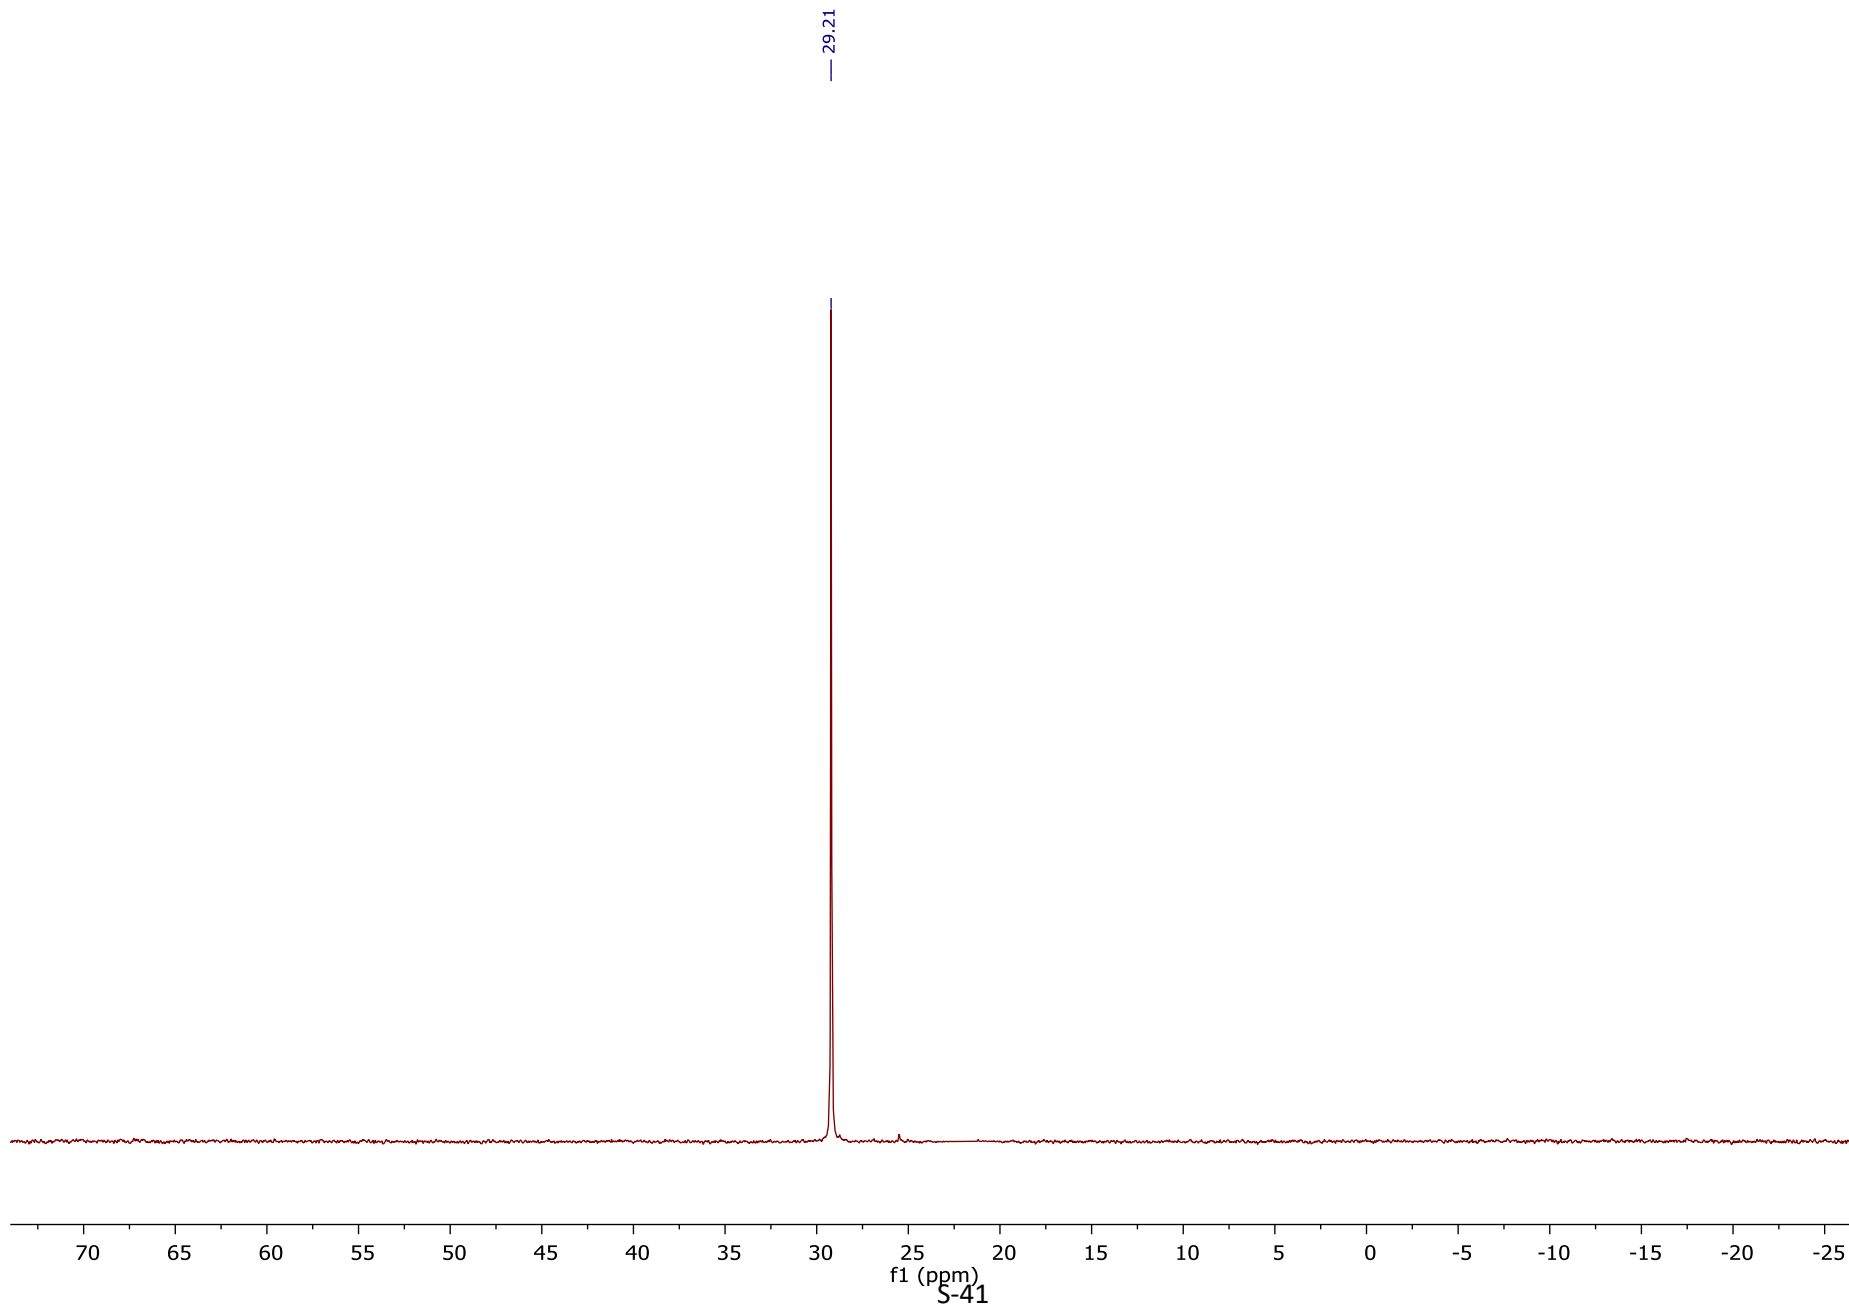

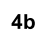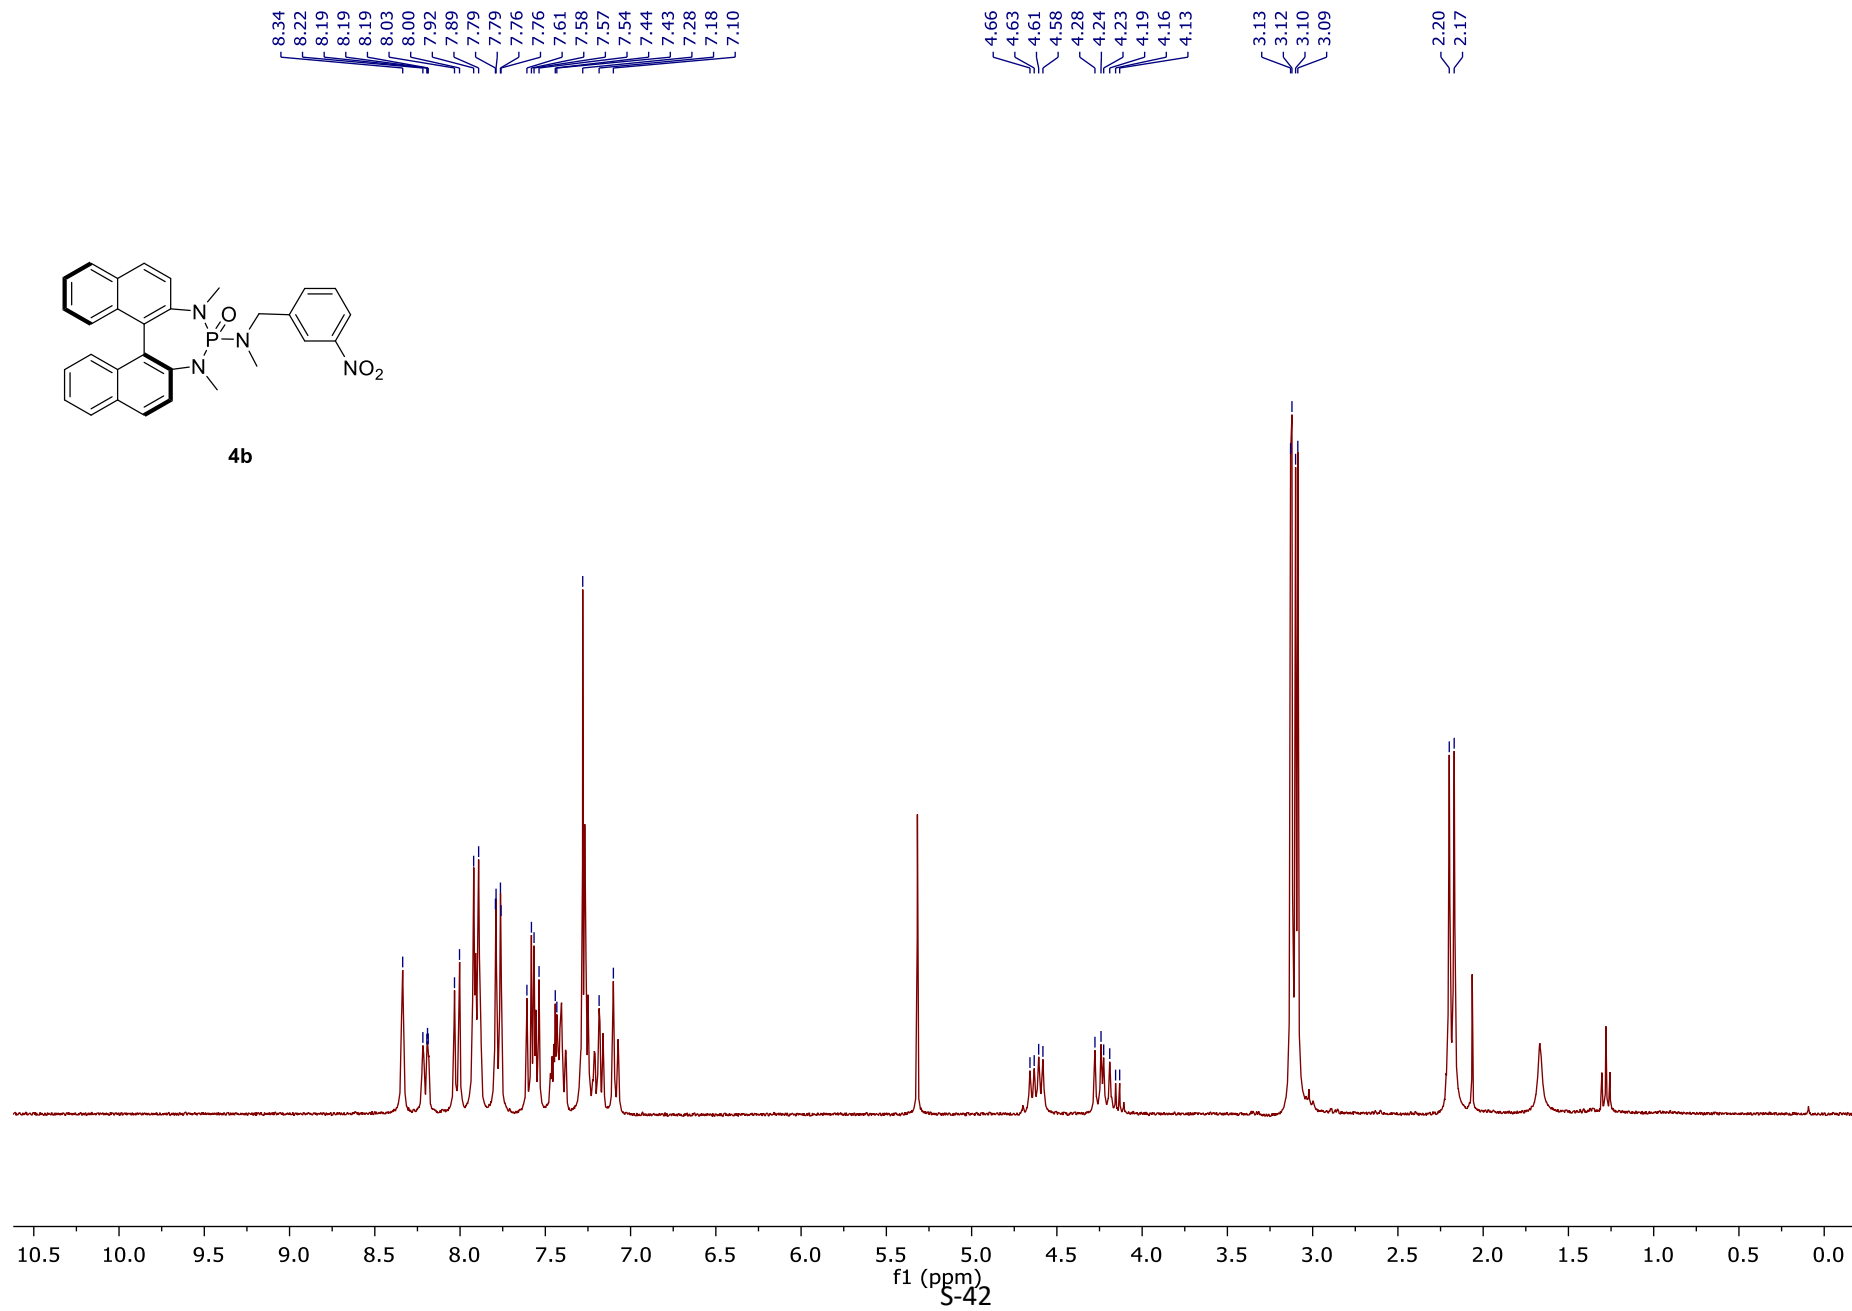

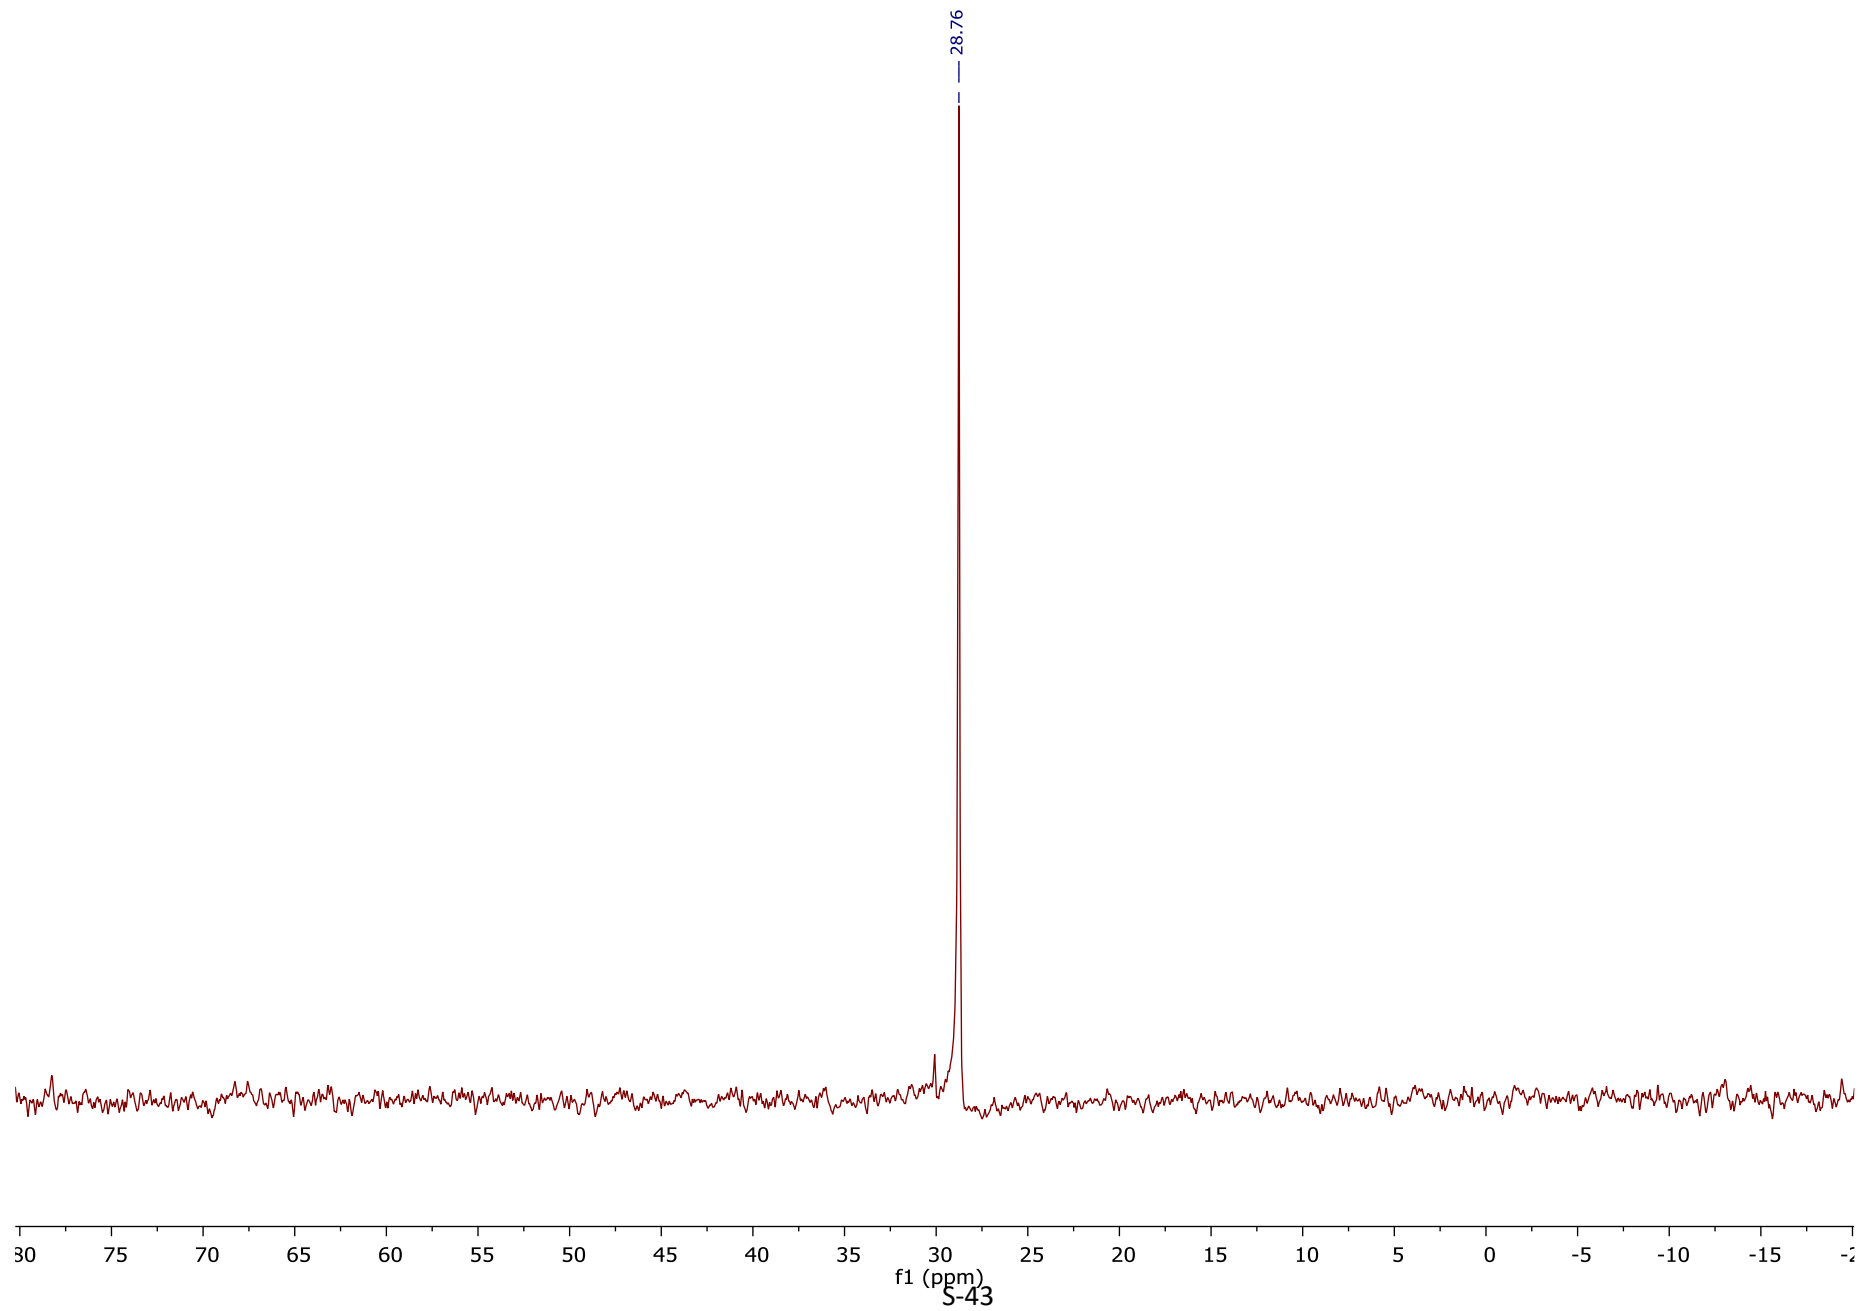

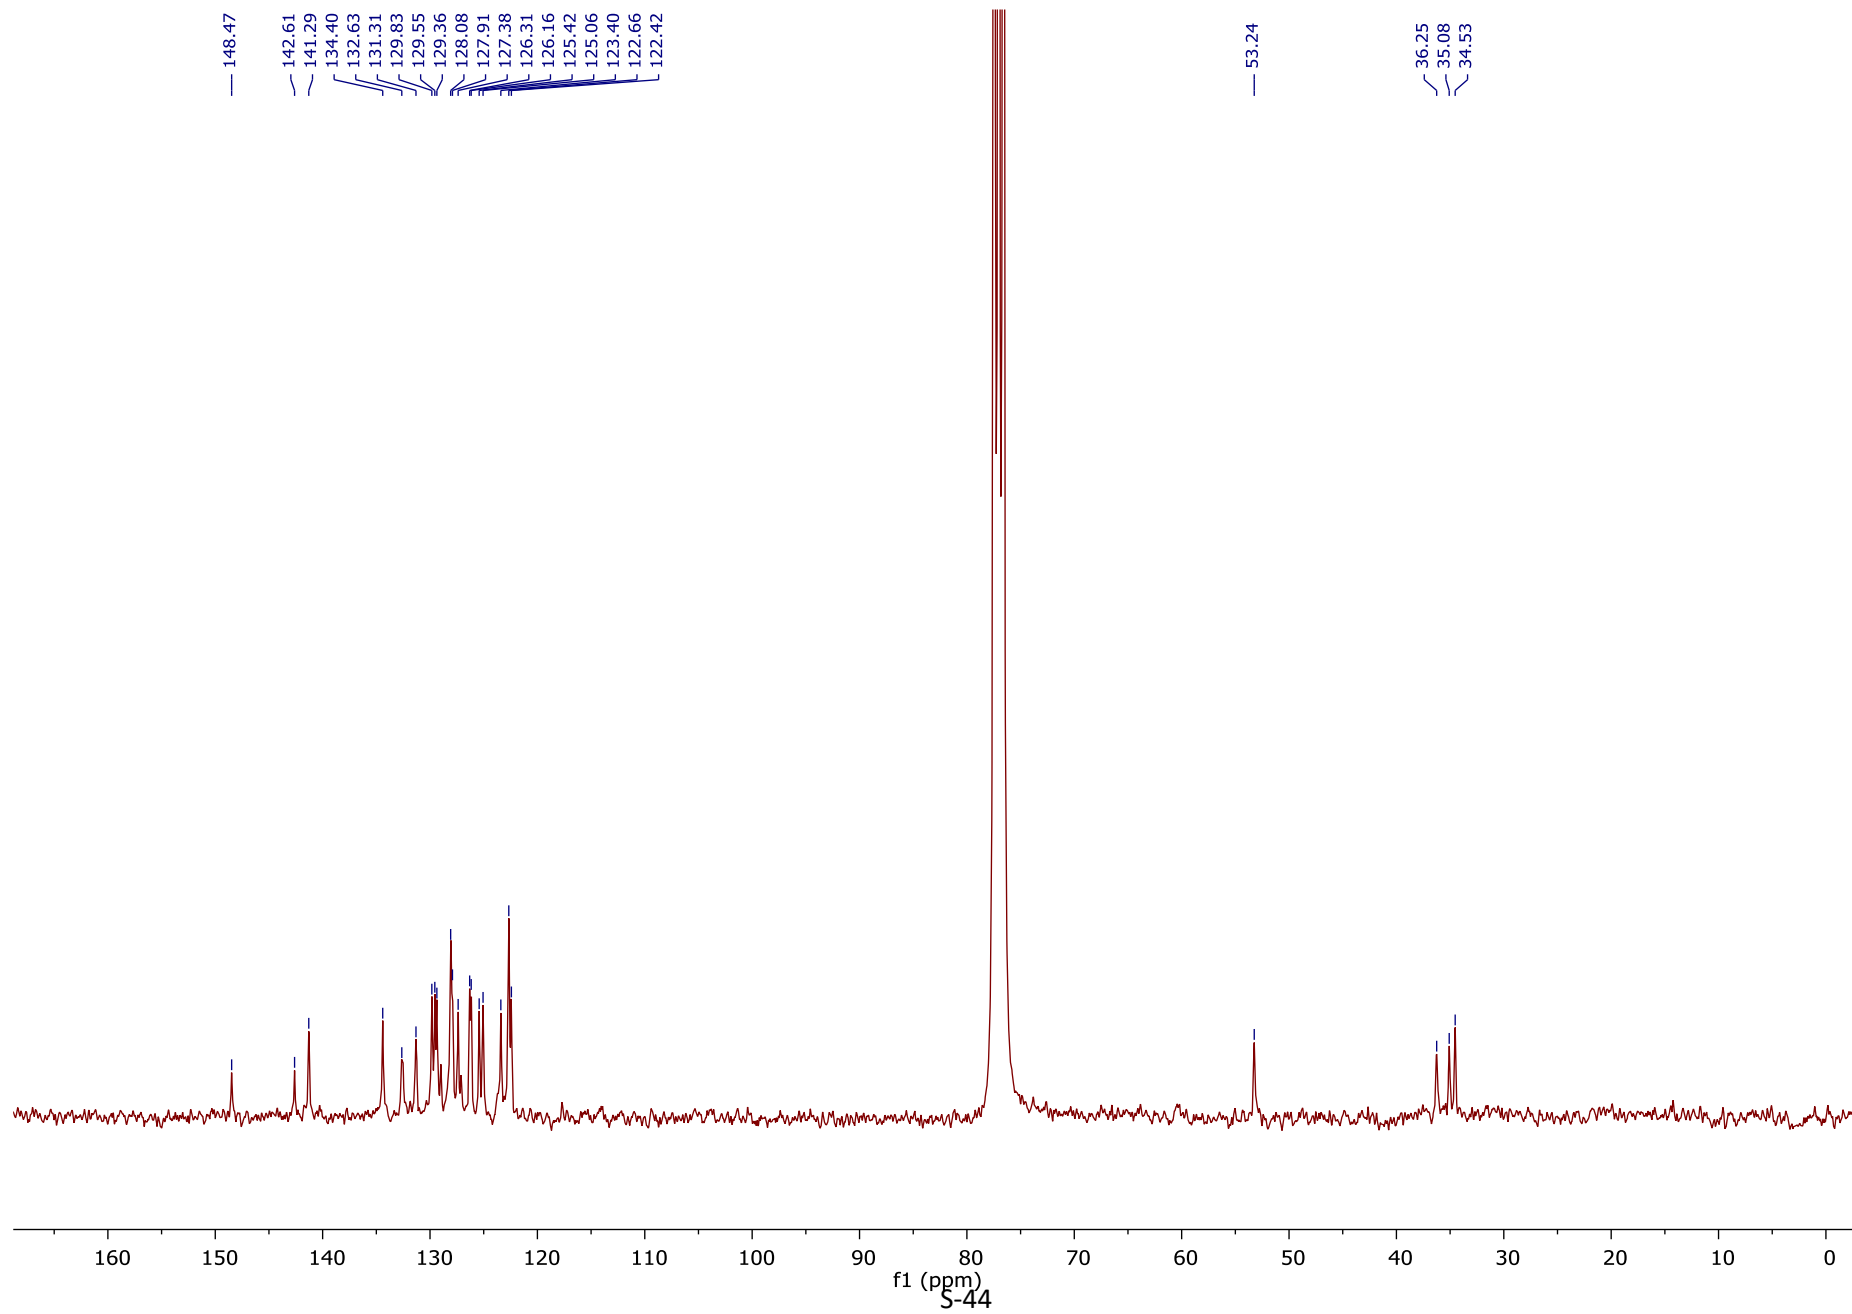

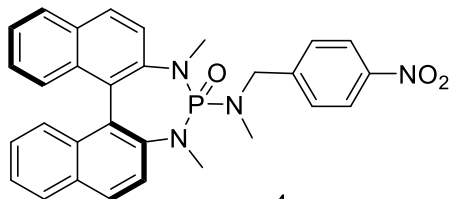

4c

8.25  
8.23  
8.00  
7.97  
7.88  
7.85  
7.76  
7.73  
7.59  
7.56  
7.44  
7.34  
7.29  
7.23  
7.17  
7.14  
7.12  
7.07  
7.04

4.47  
4.45  
4.42  
4.40  
4.30  
4.27  
4.25  
4.22

2.18  
2.15

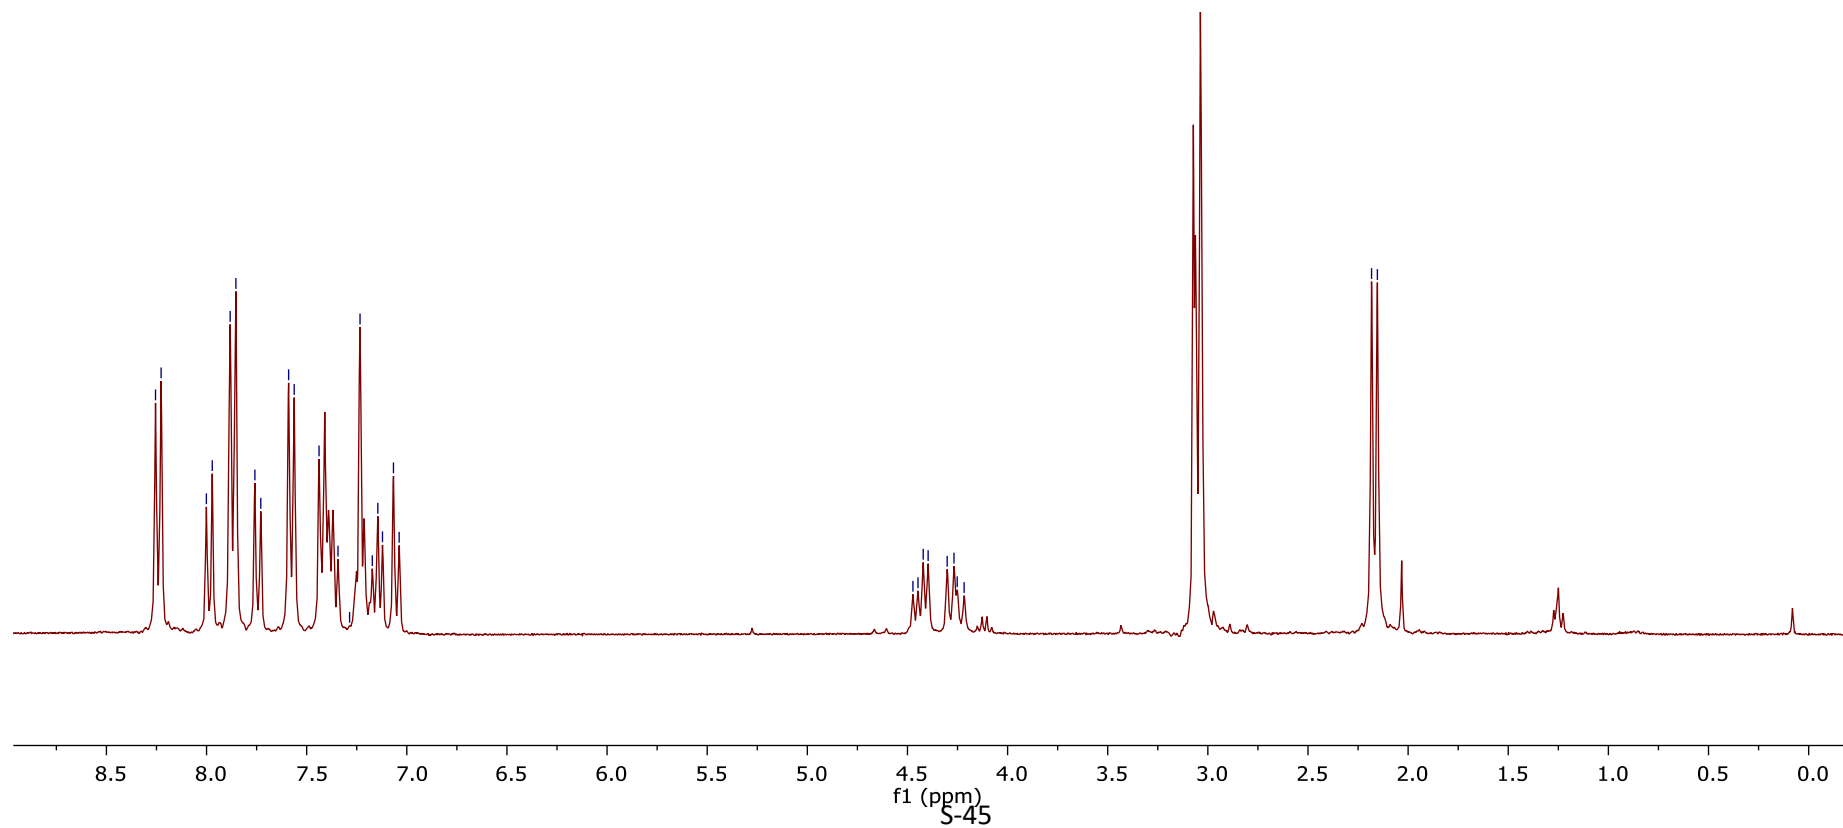

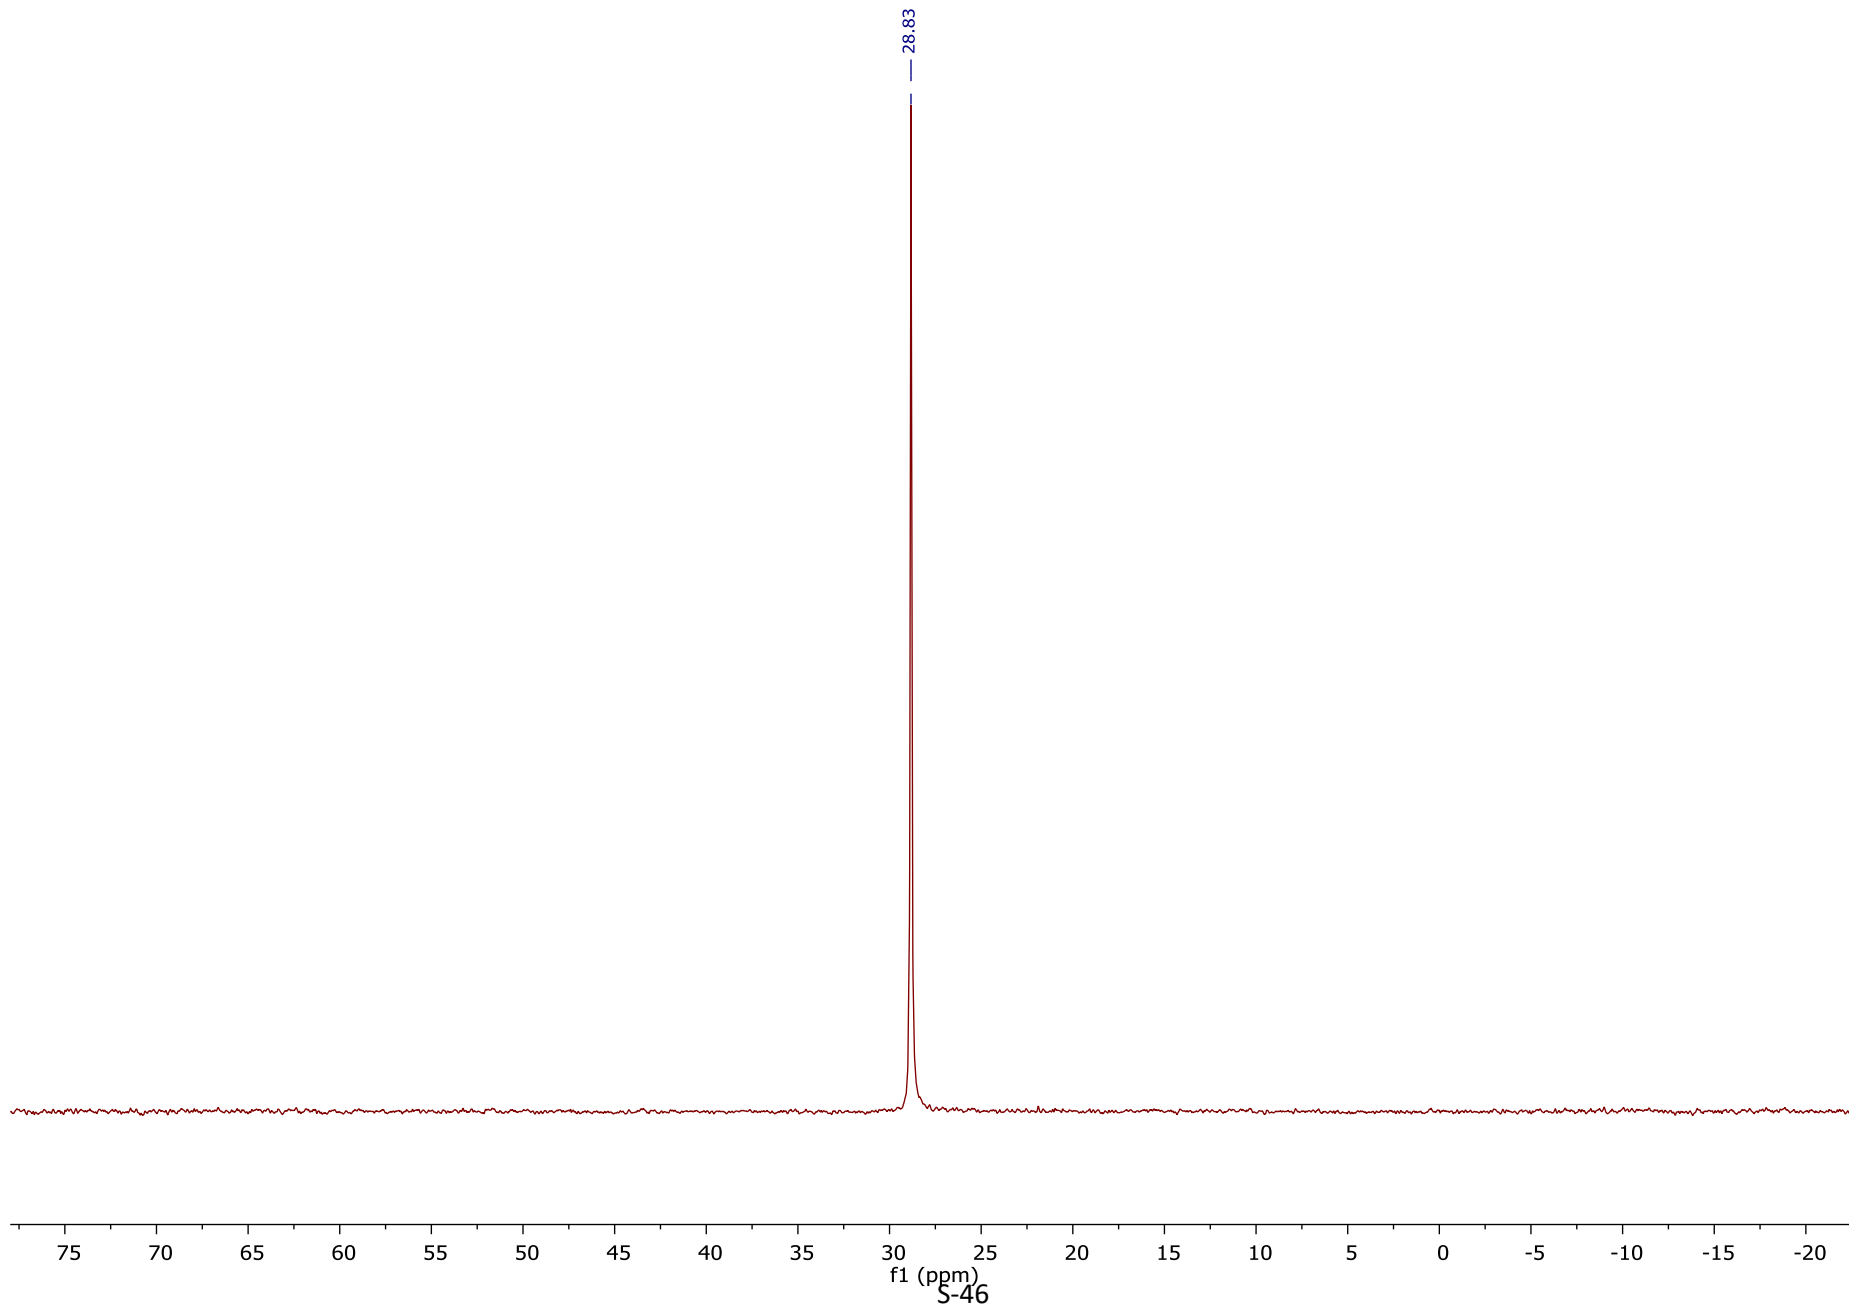

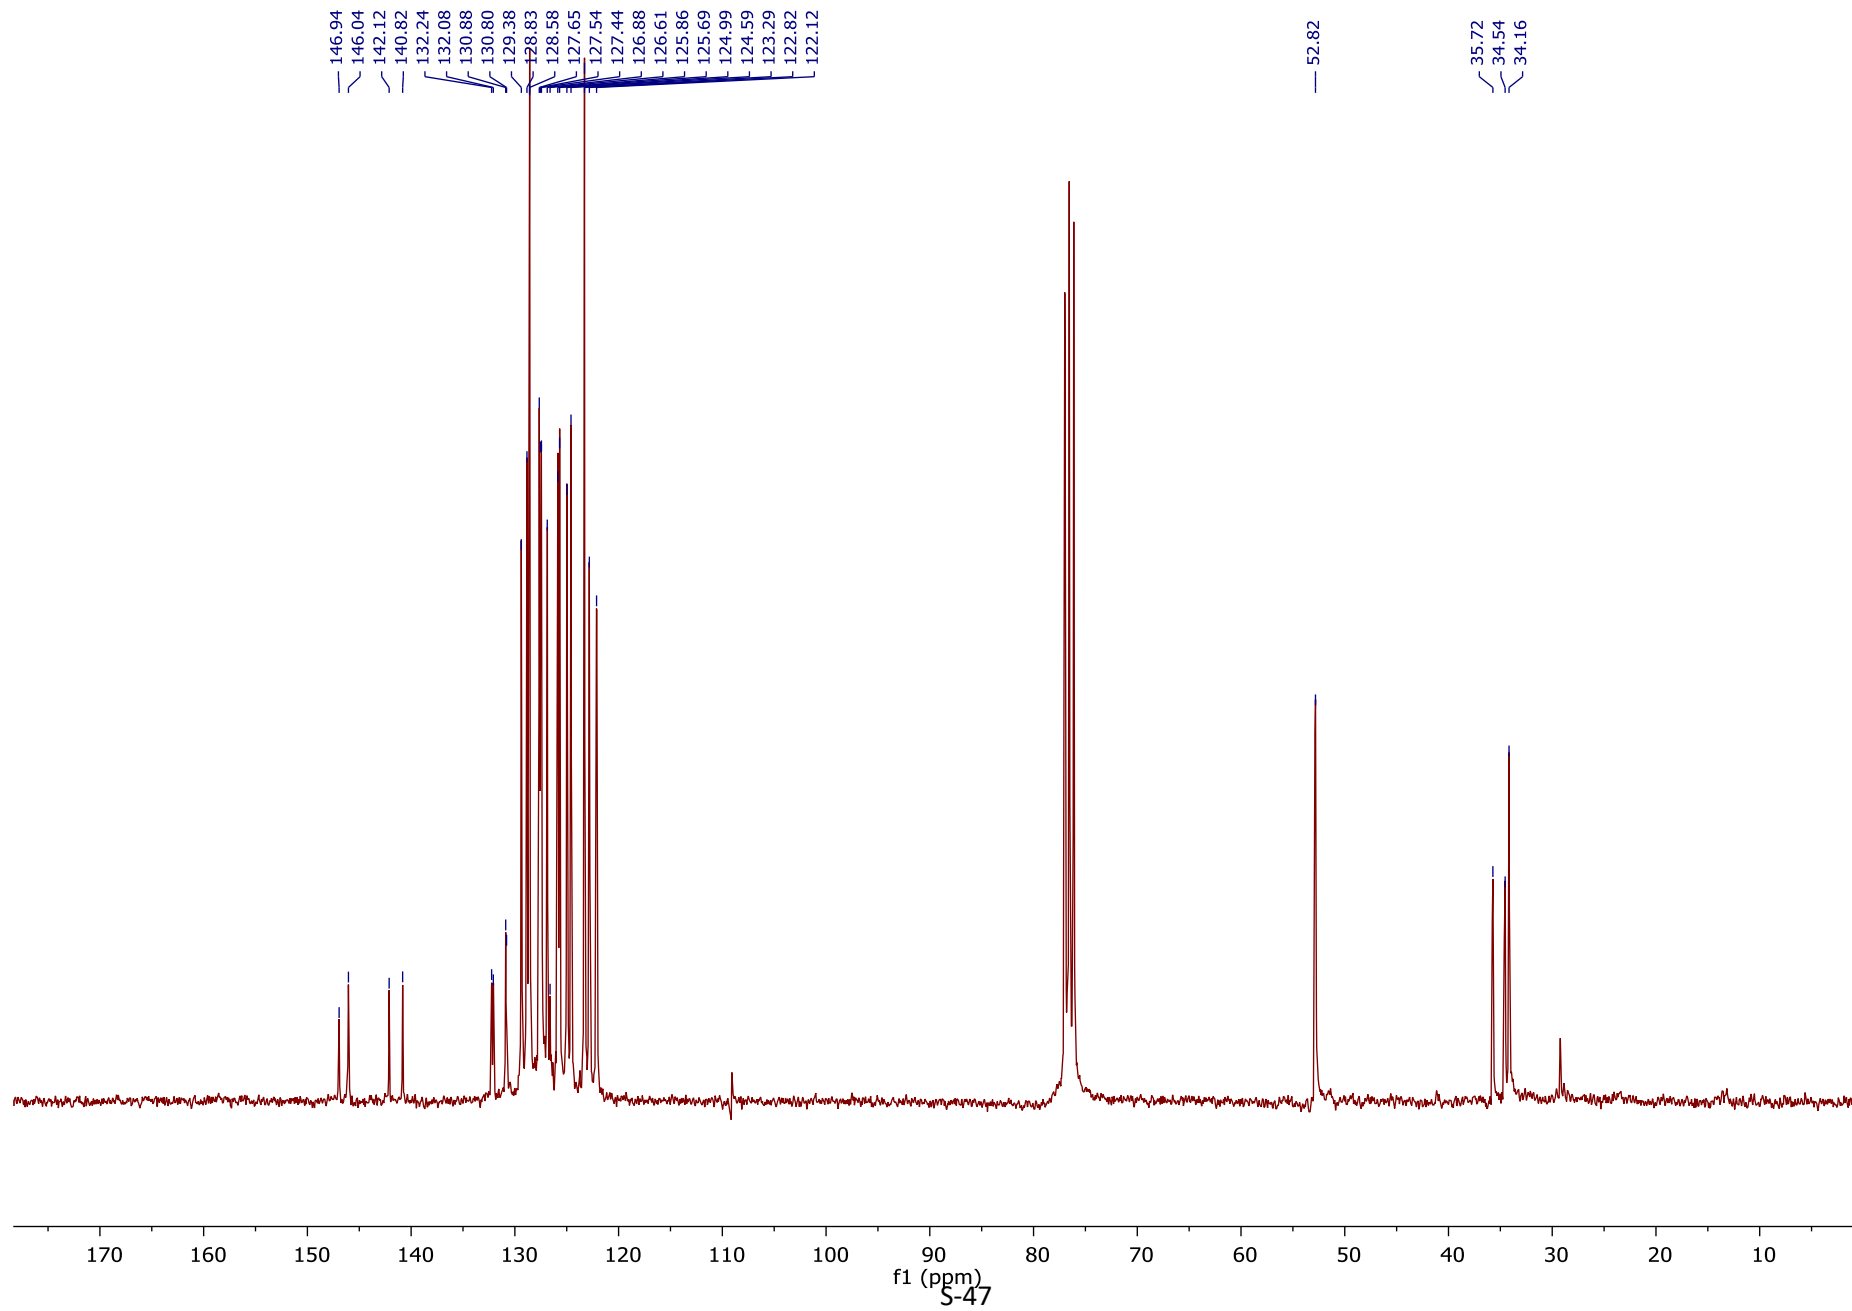

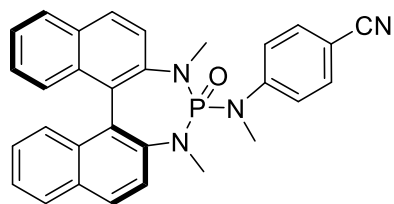

4e

8.05  
8.03  
7.94  
7.93  
7.91  
7.90  
7.90  
7.87  
7.79  
7.76  
7.50  
7.49  
7.48  
7.36  
7.28  
7.27  
7.18  
7.18  
7.16  
7.16  
7.08  
7.05

3.20  
3.16  
3.11  
3.07  
2.91  
2.89

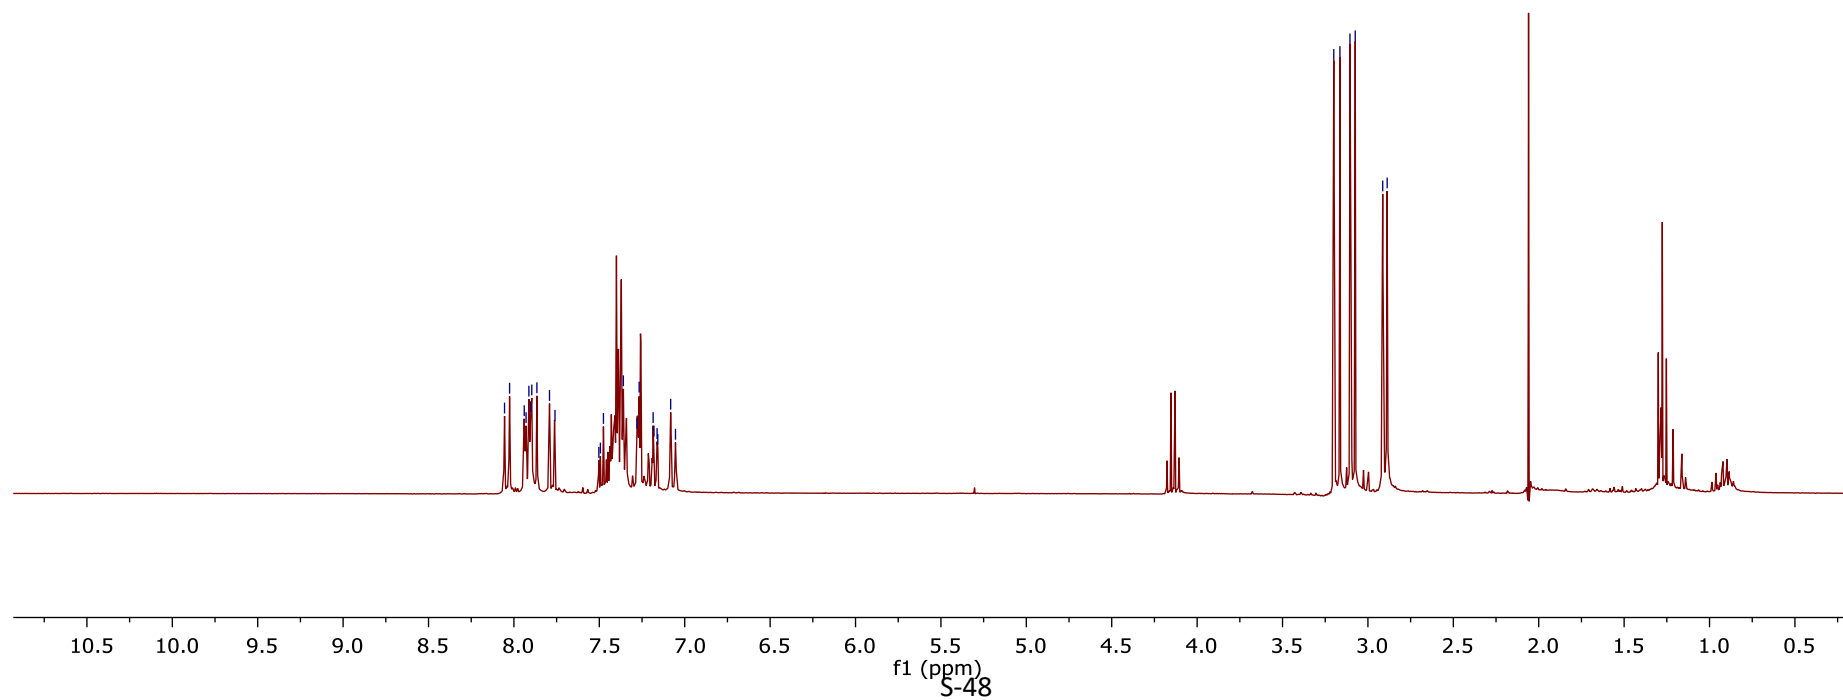

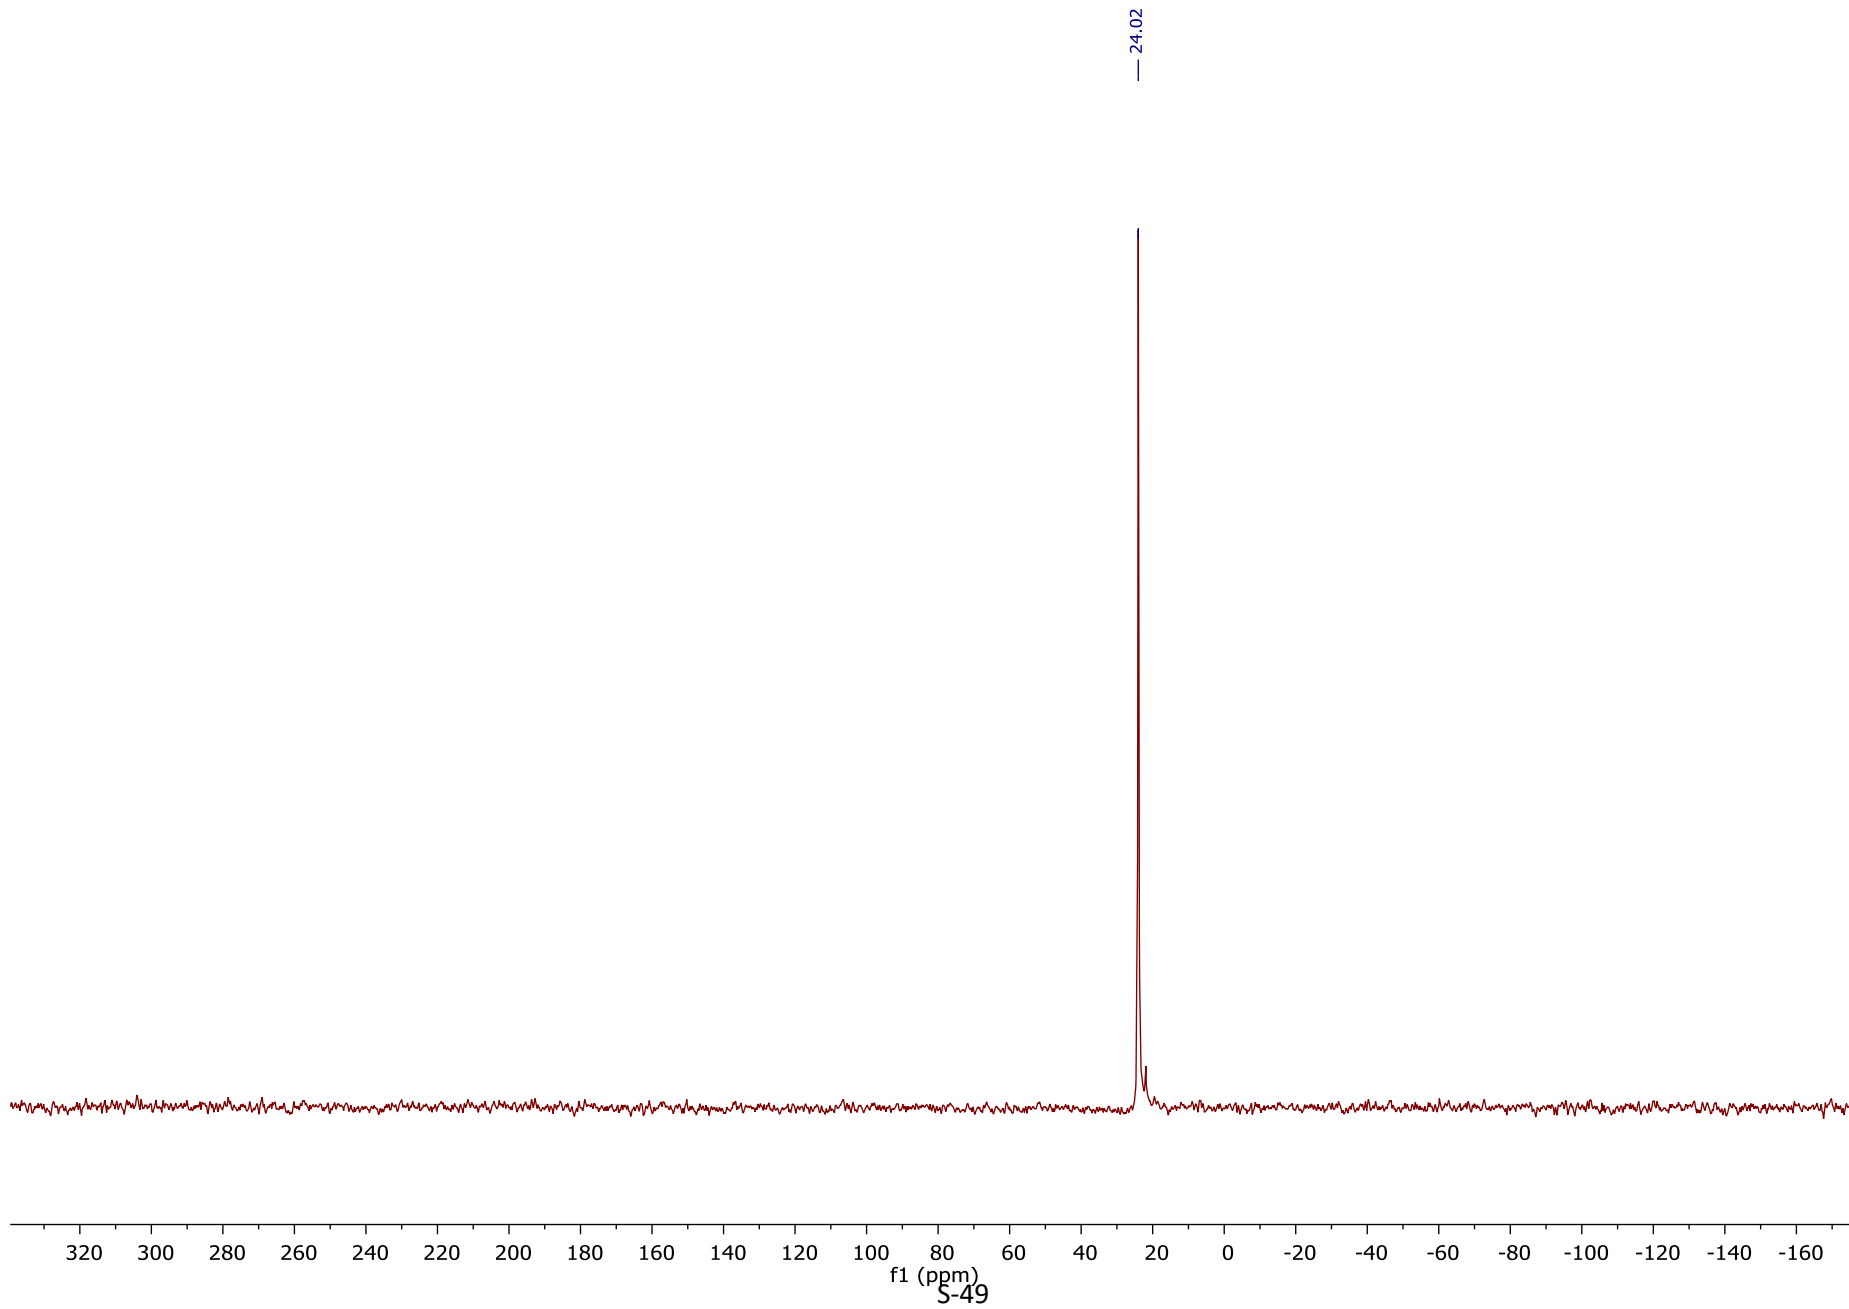

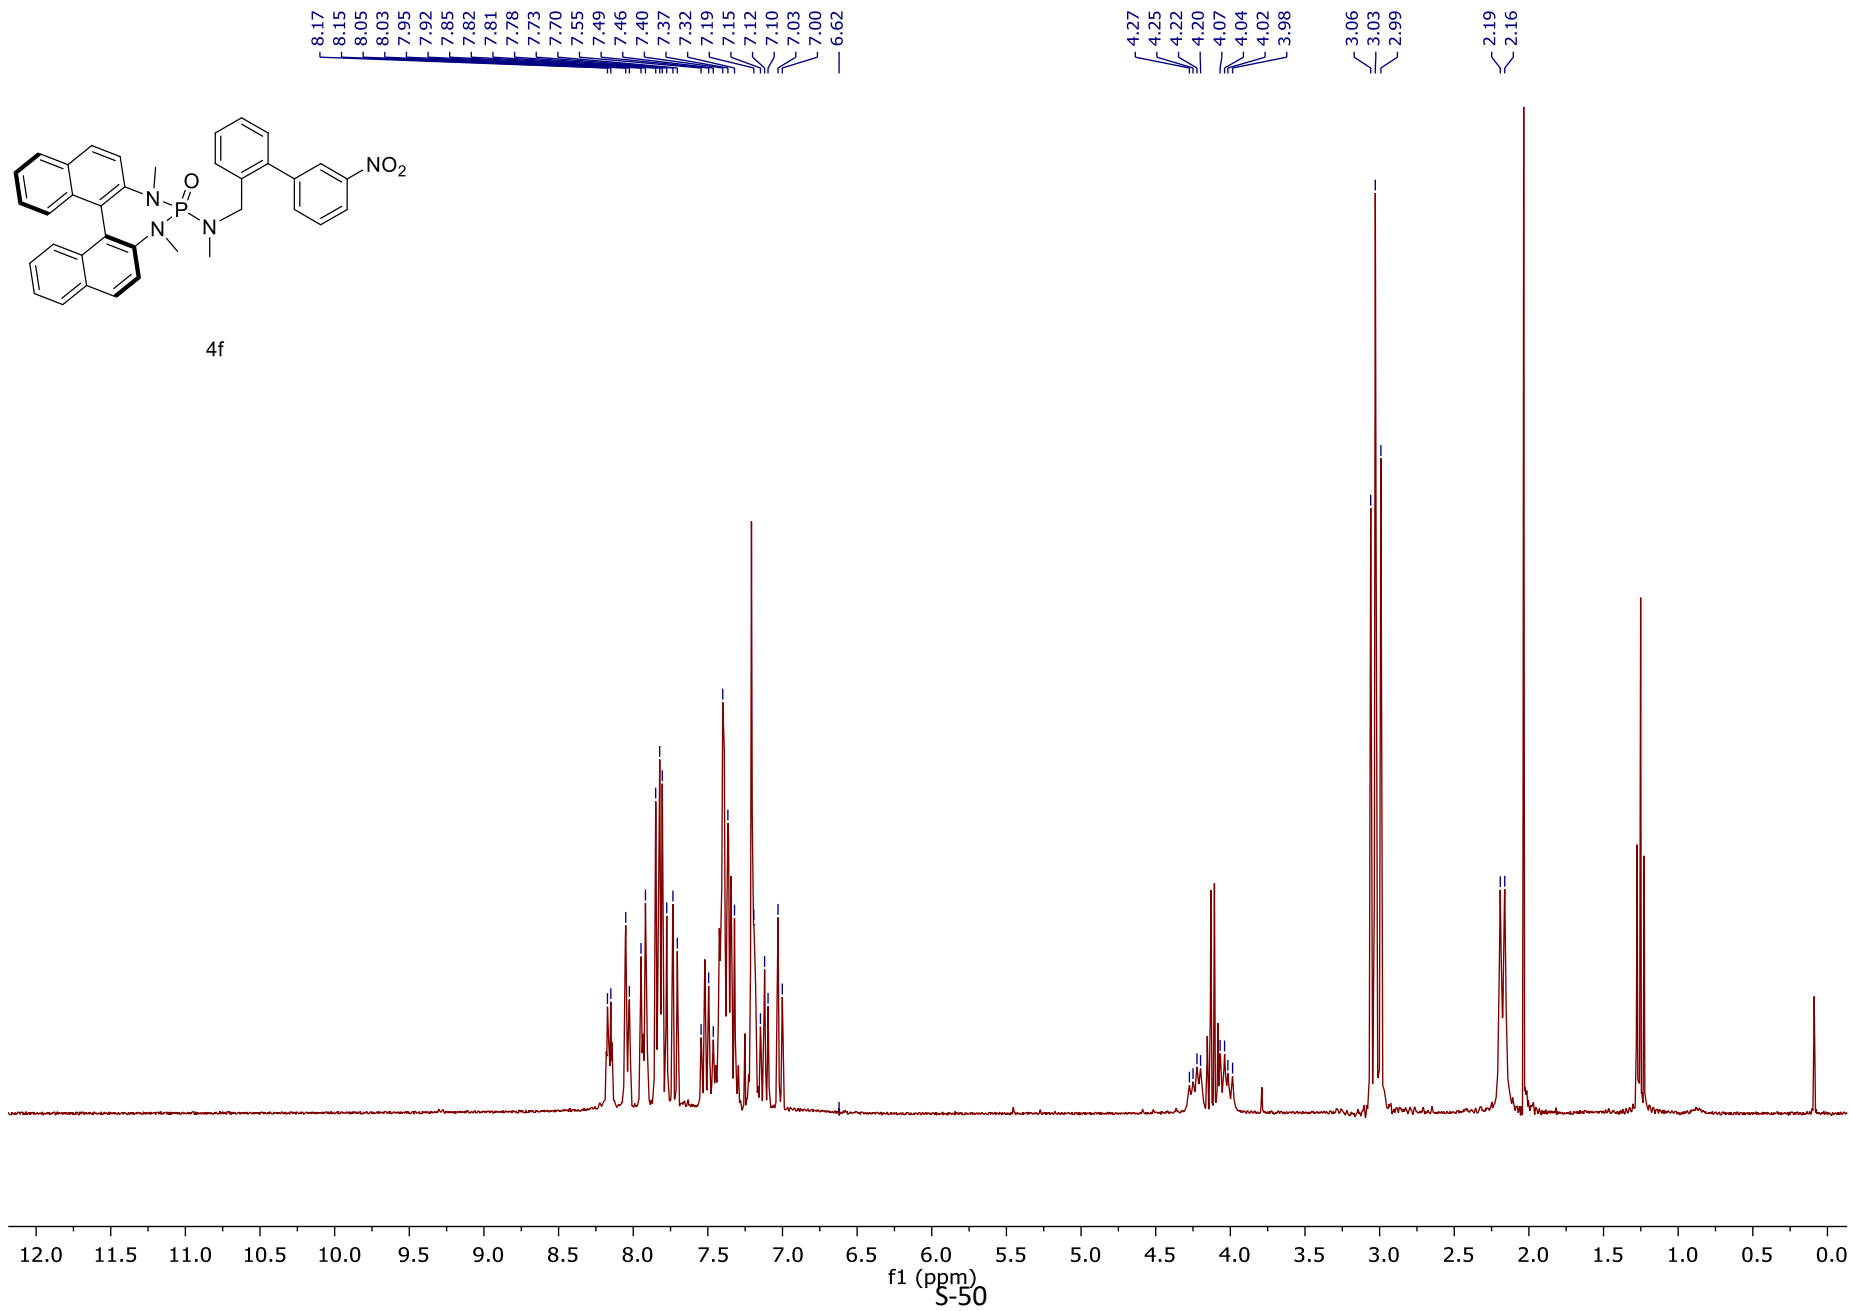

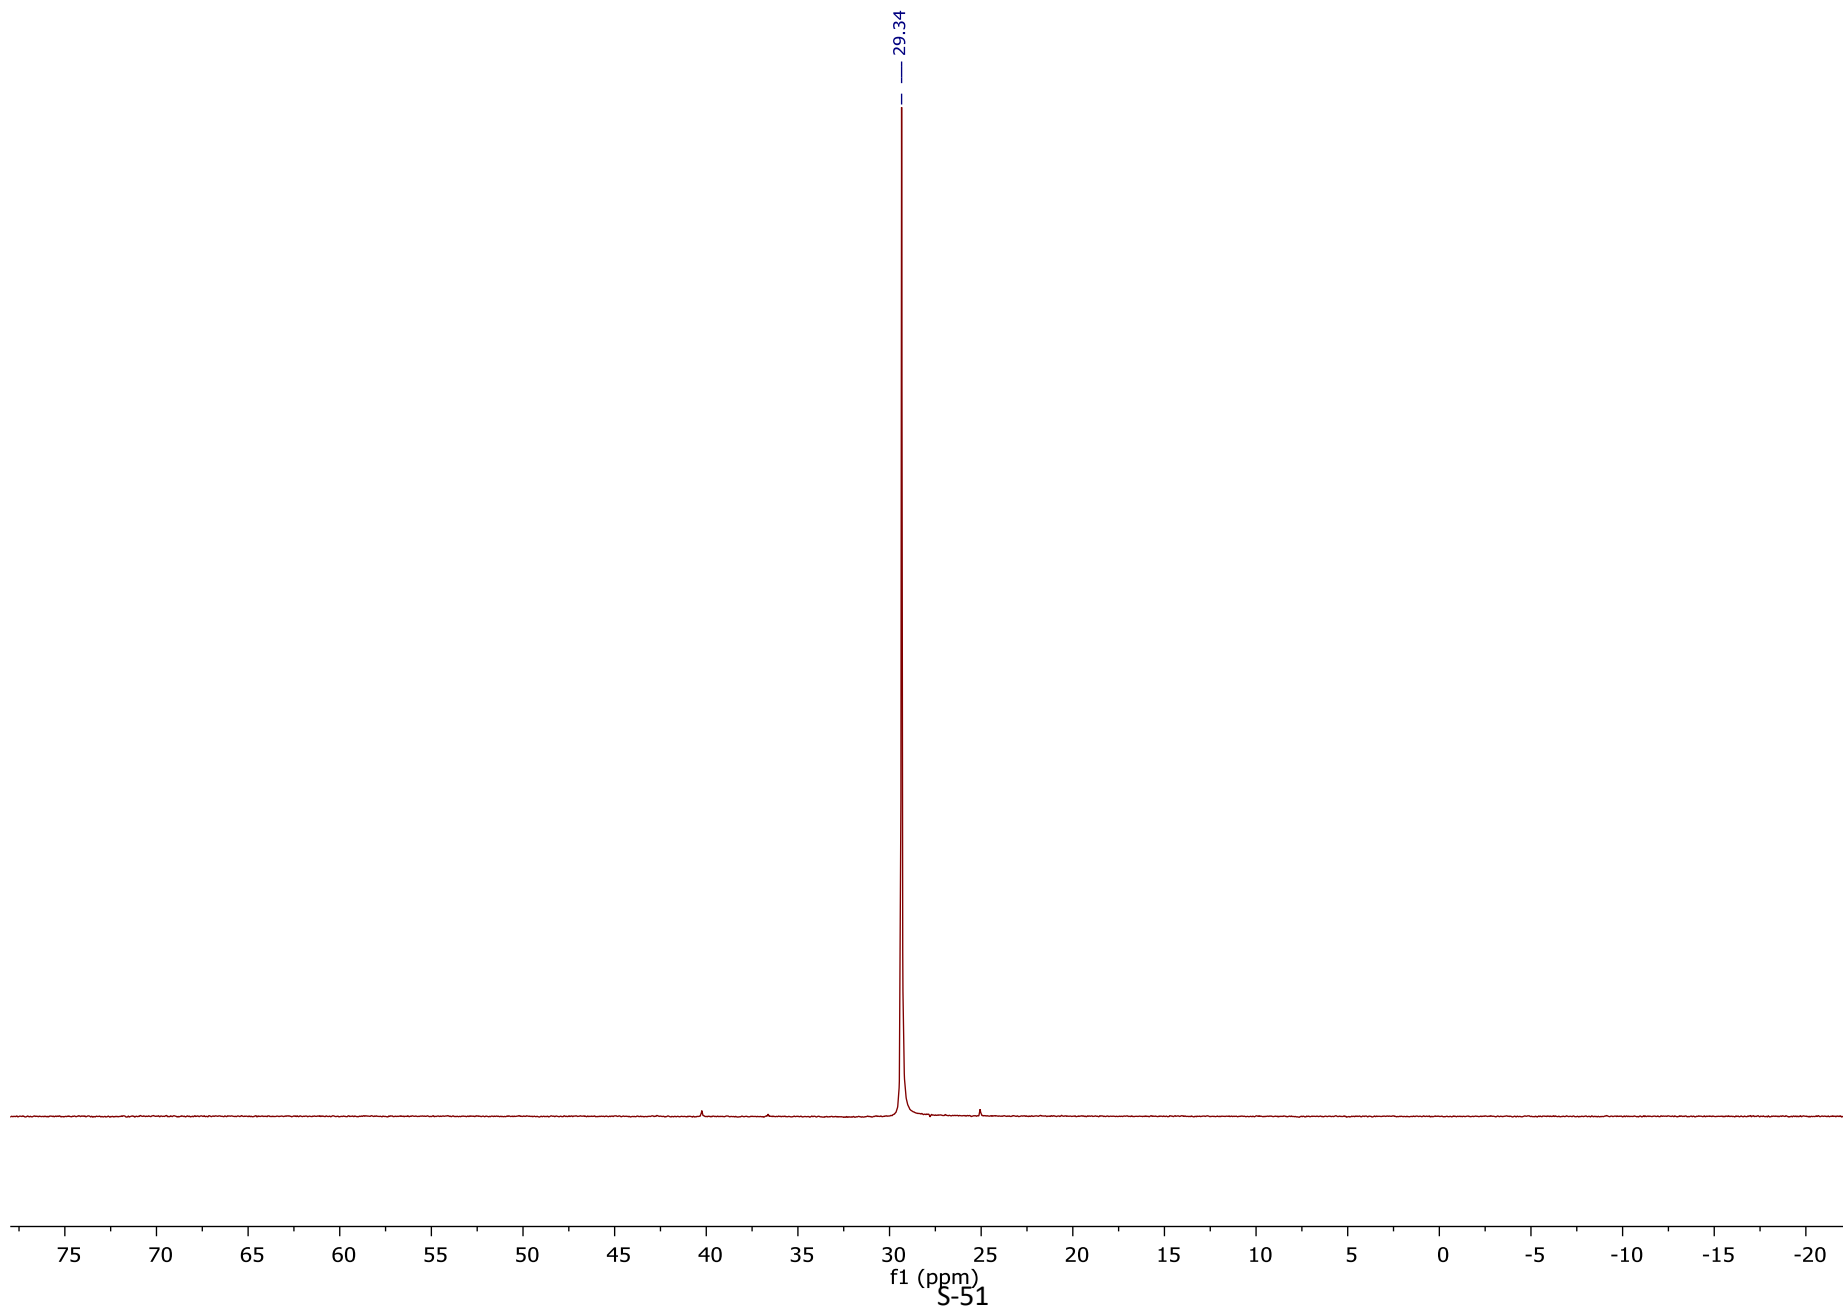

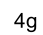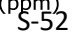

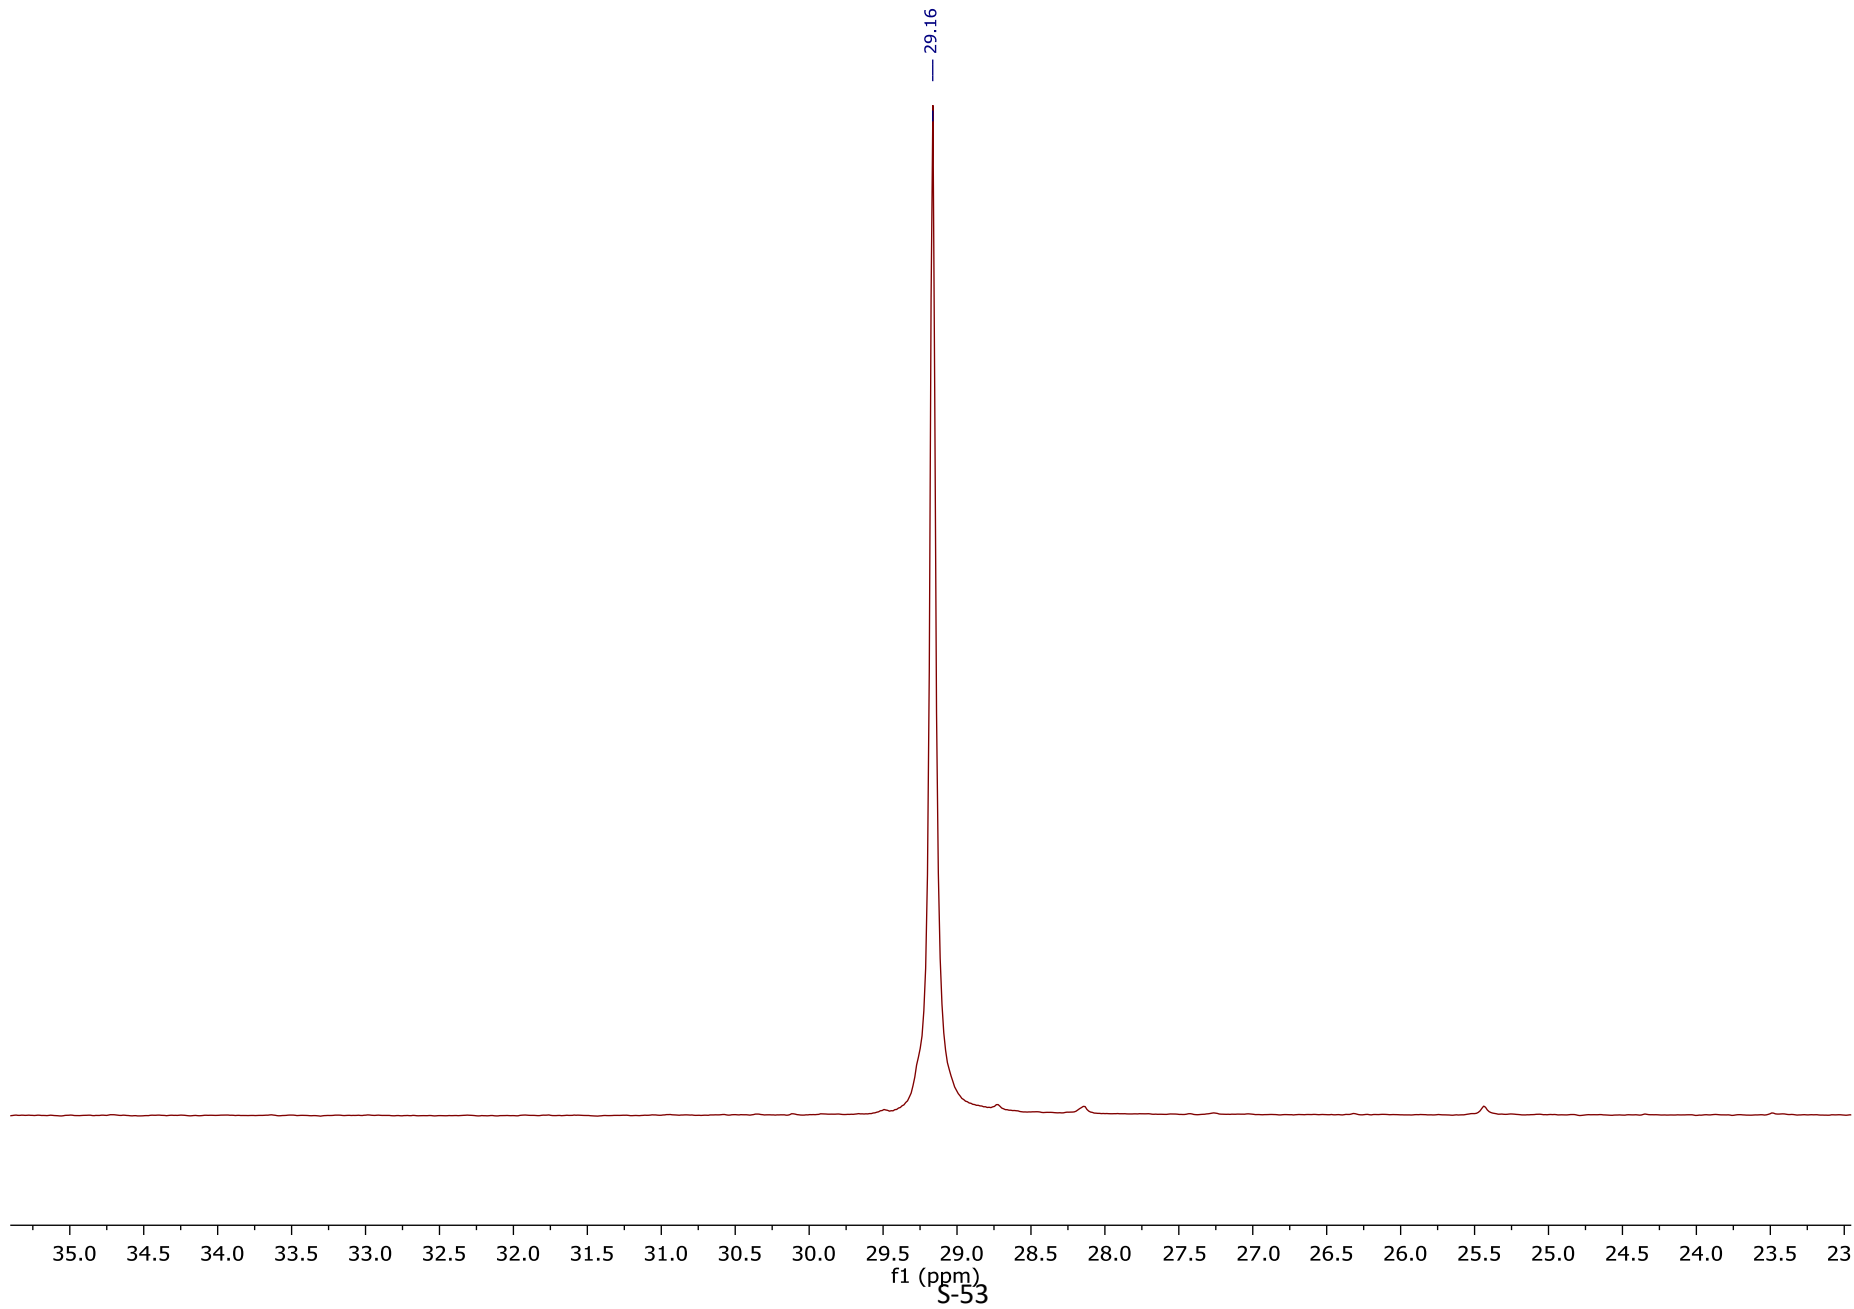

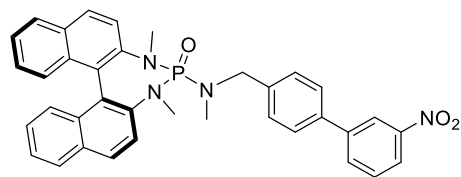

4h

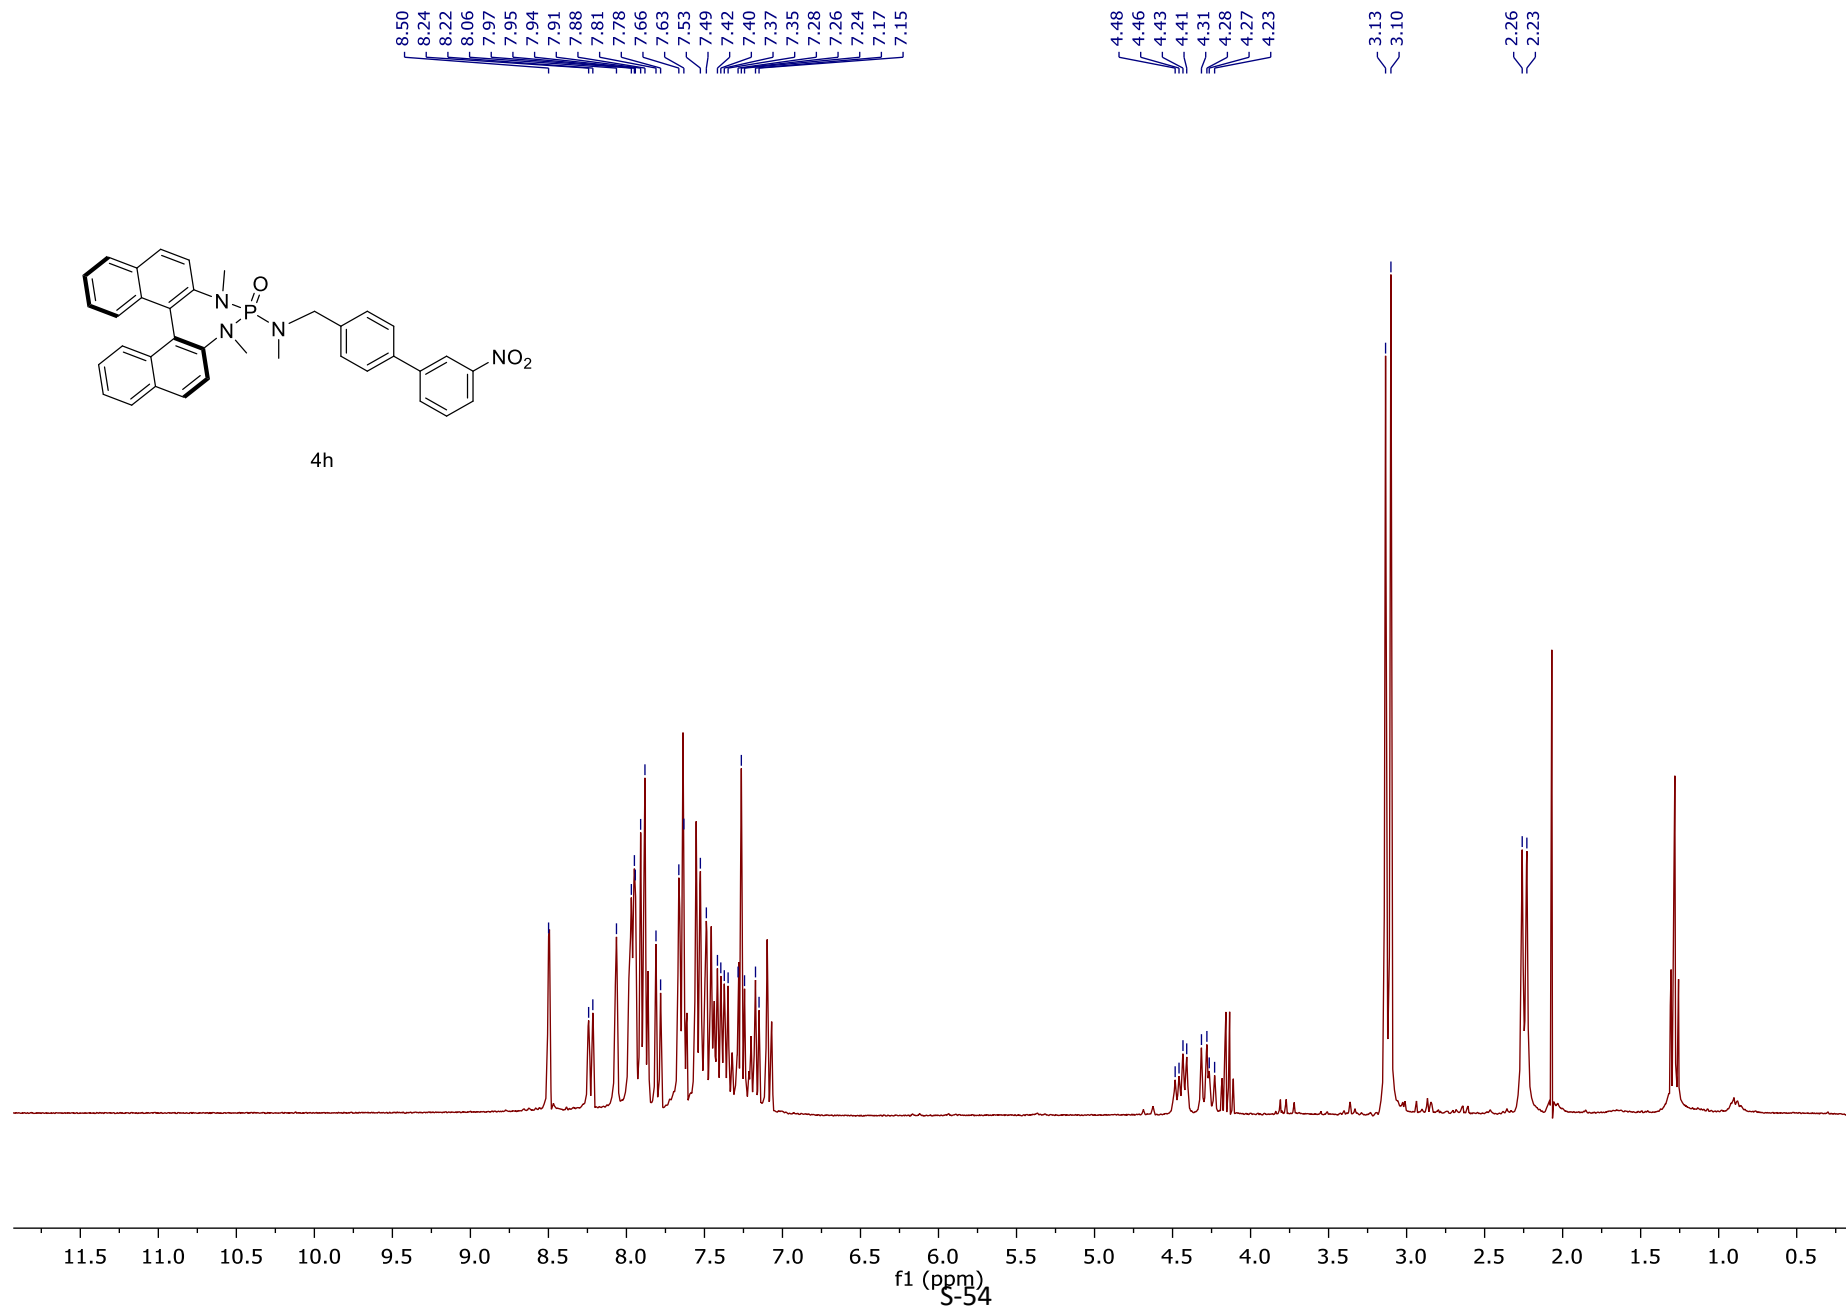

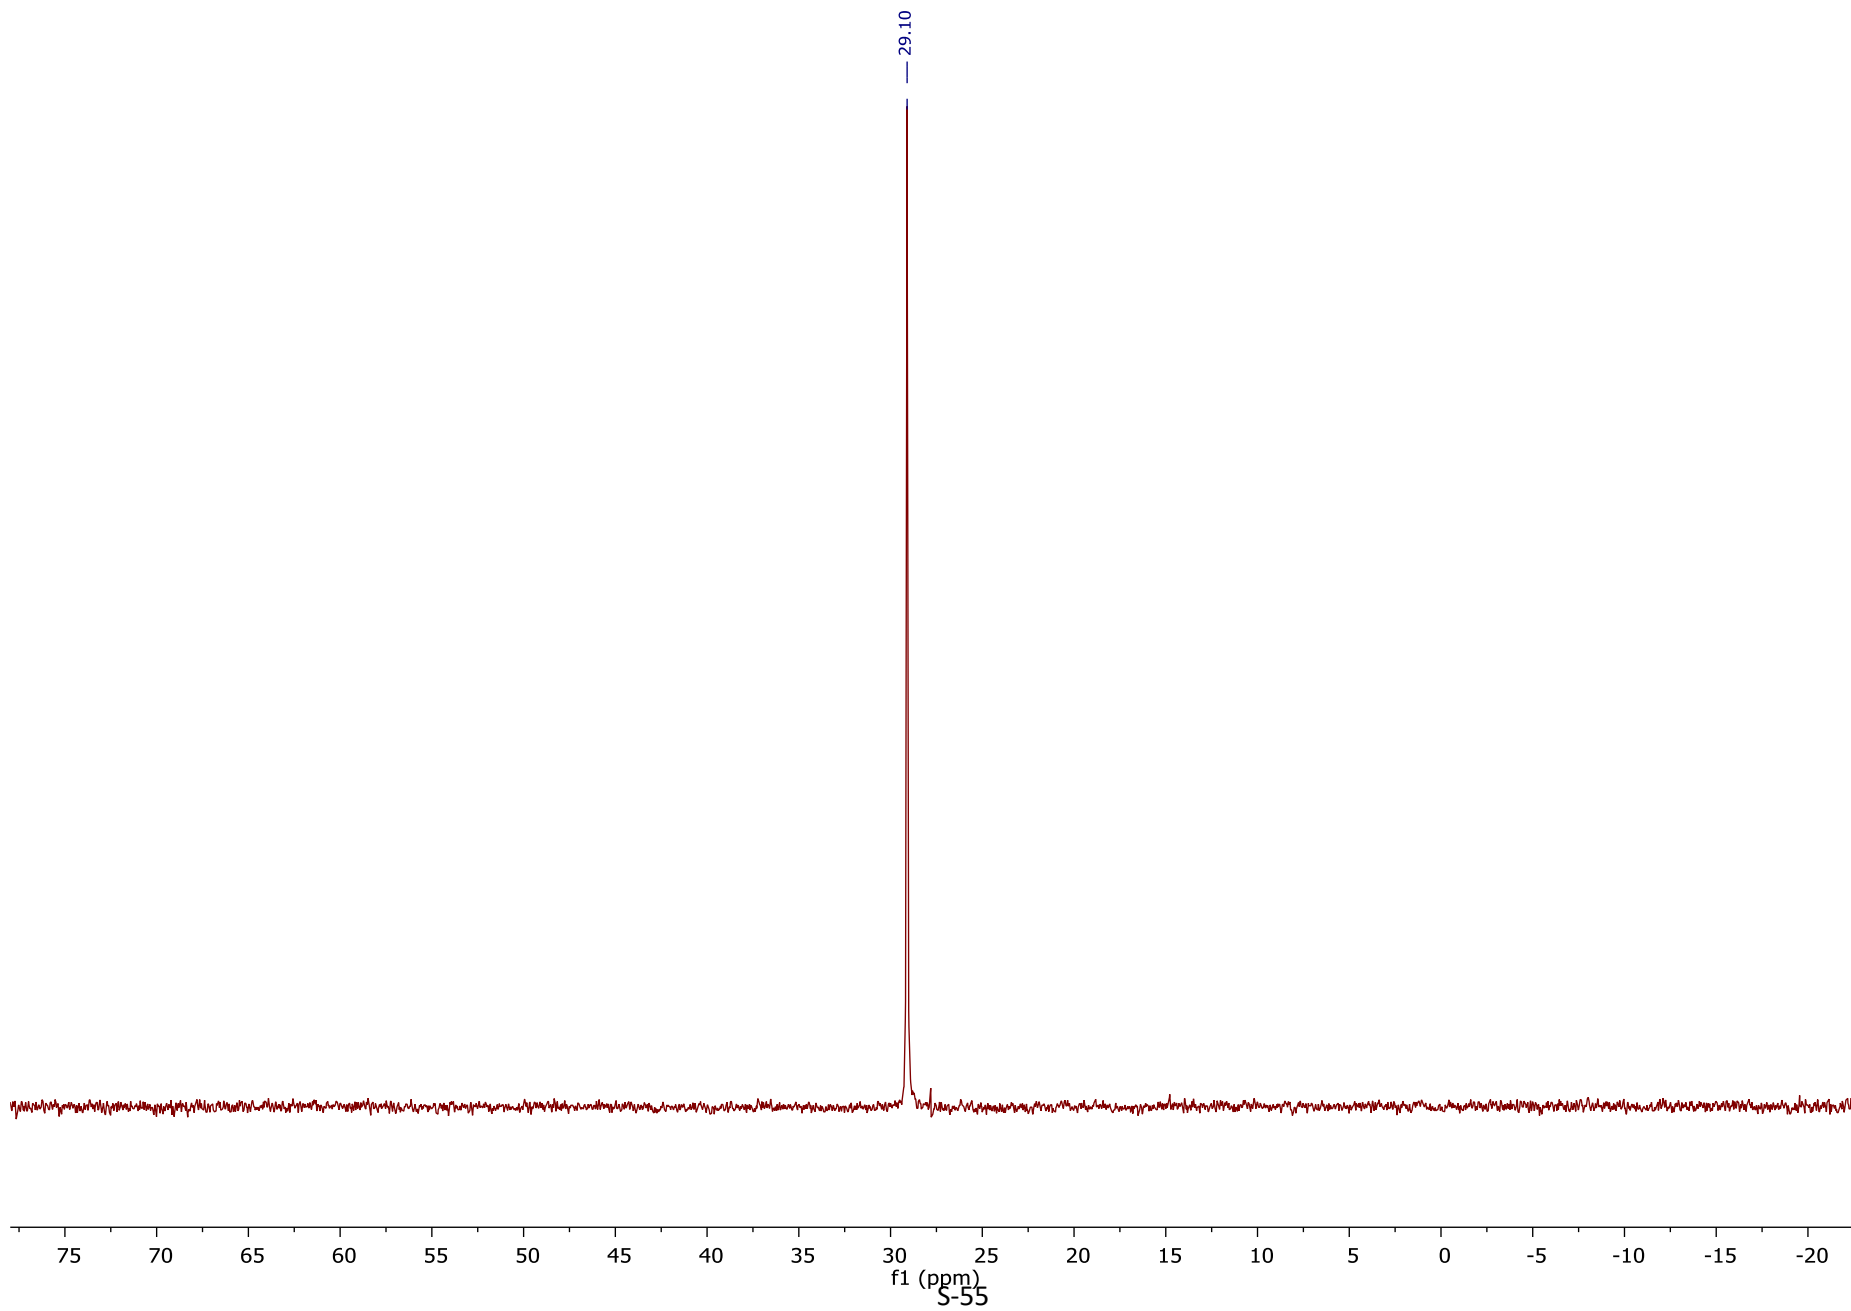

7.99  
7.96  
7.94  
7.92  
7.90  
7.89  
7.87  
7.86  
7.74  
7.71  
7.57  
7.54  
7.41  
7.39  
7.37  
7.23  
7.21  
7.15  
7.12  
7.09  
6.98  
6.96  
6.67  
6.65  
6.63  
6.60  
6.58

4.45  
4.42  
4.41  
4.37  
4.17  
4.15  
4.10  
4.09

3.05  
3.02  
3.02  
2.99

2.08  
2.05  
2.04

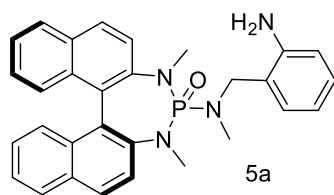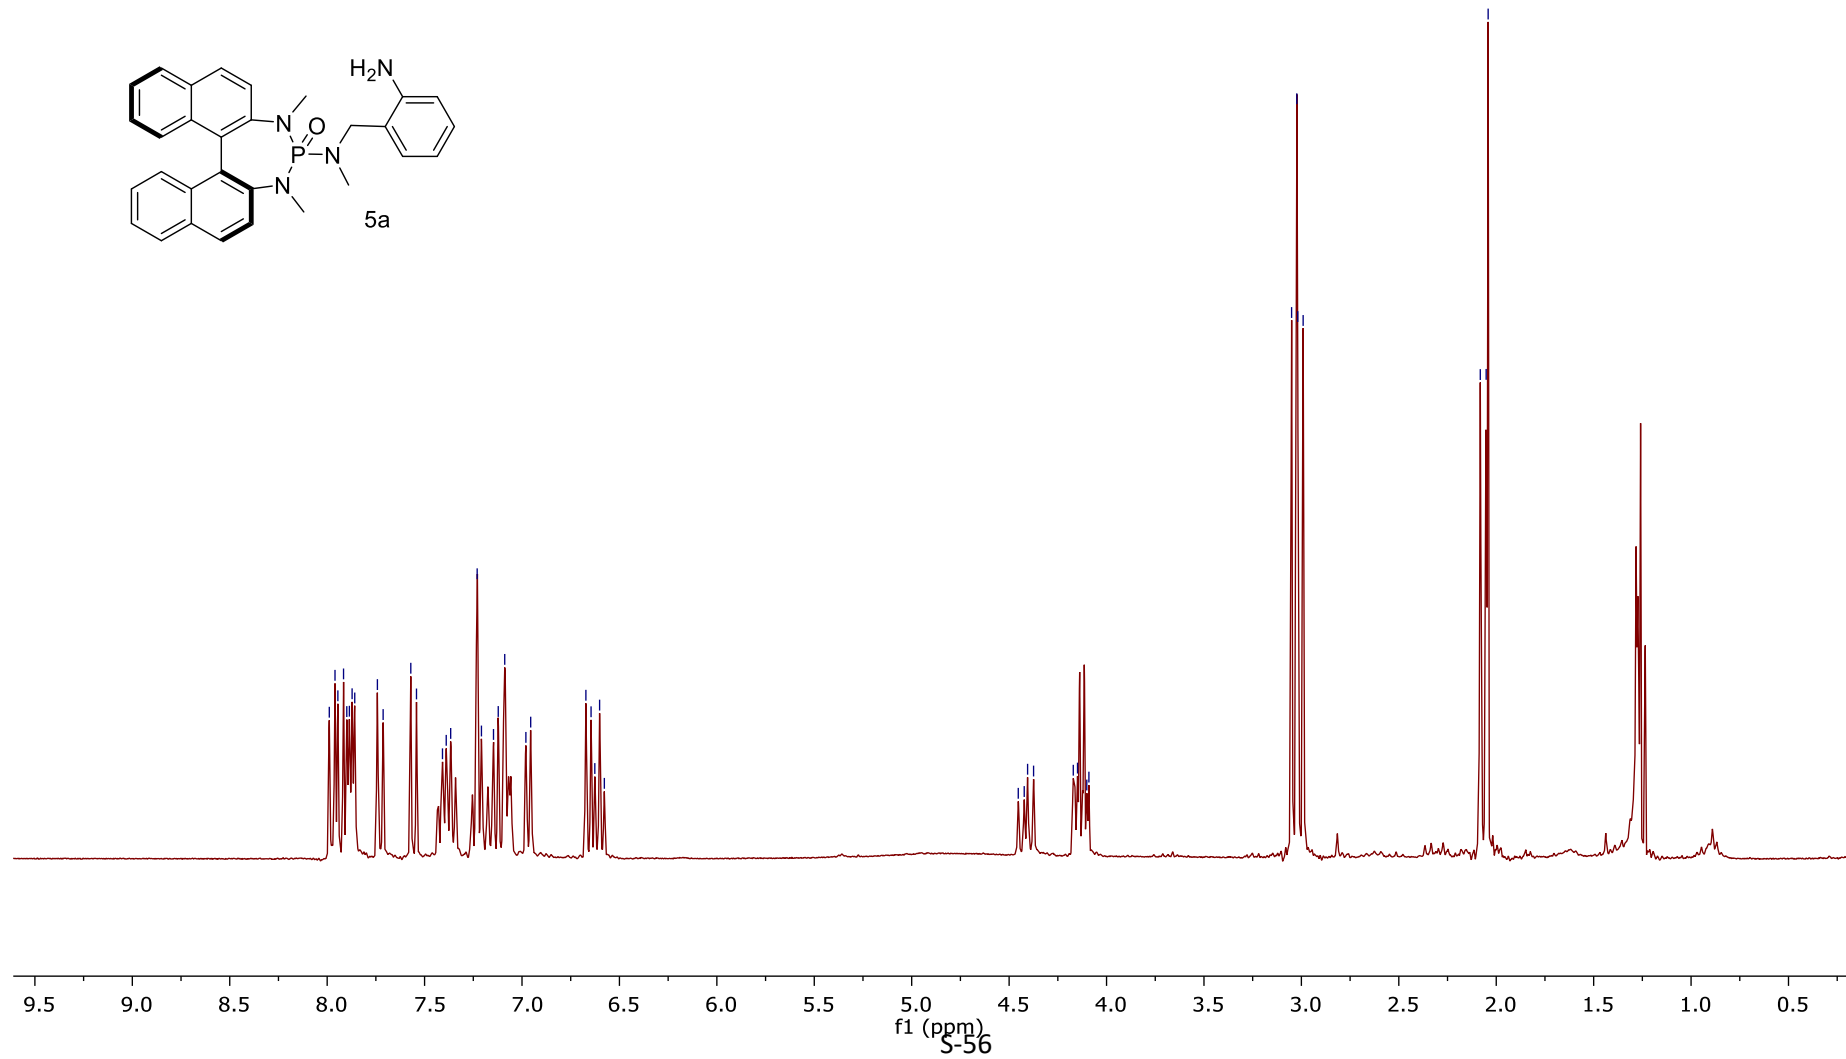

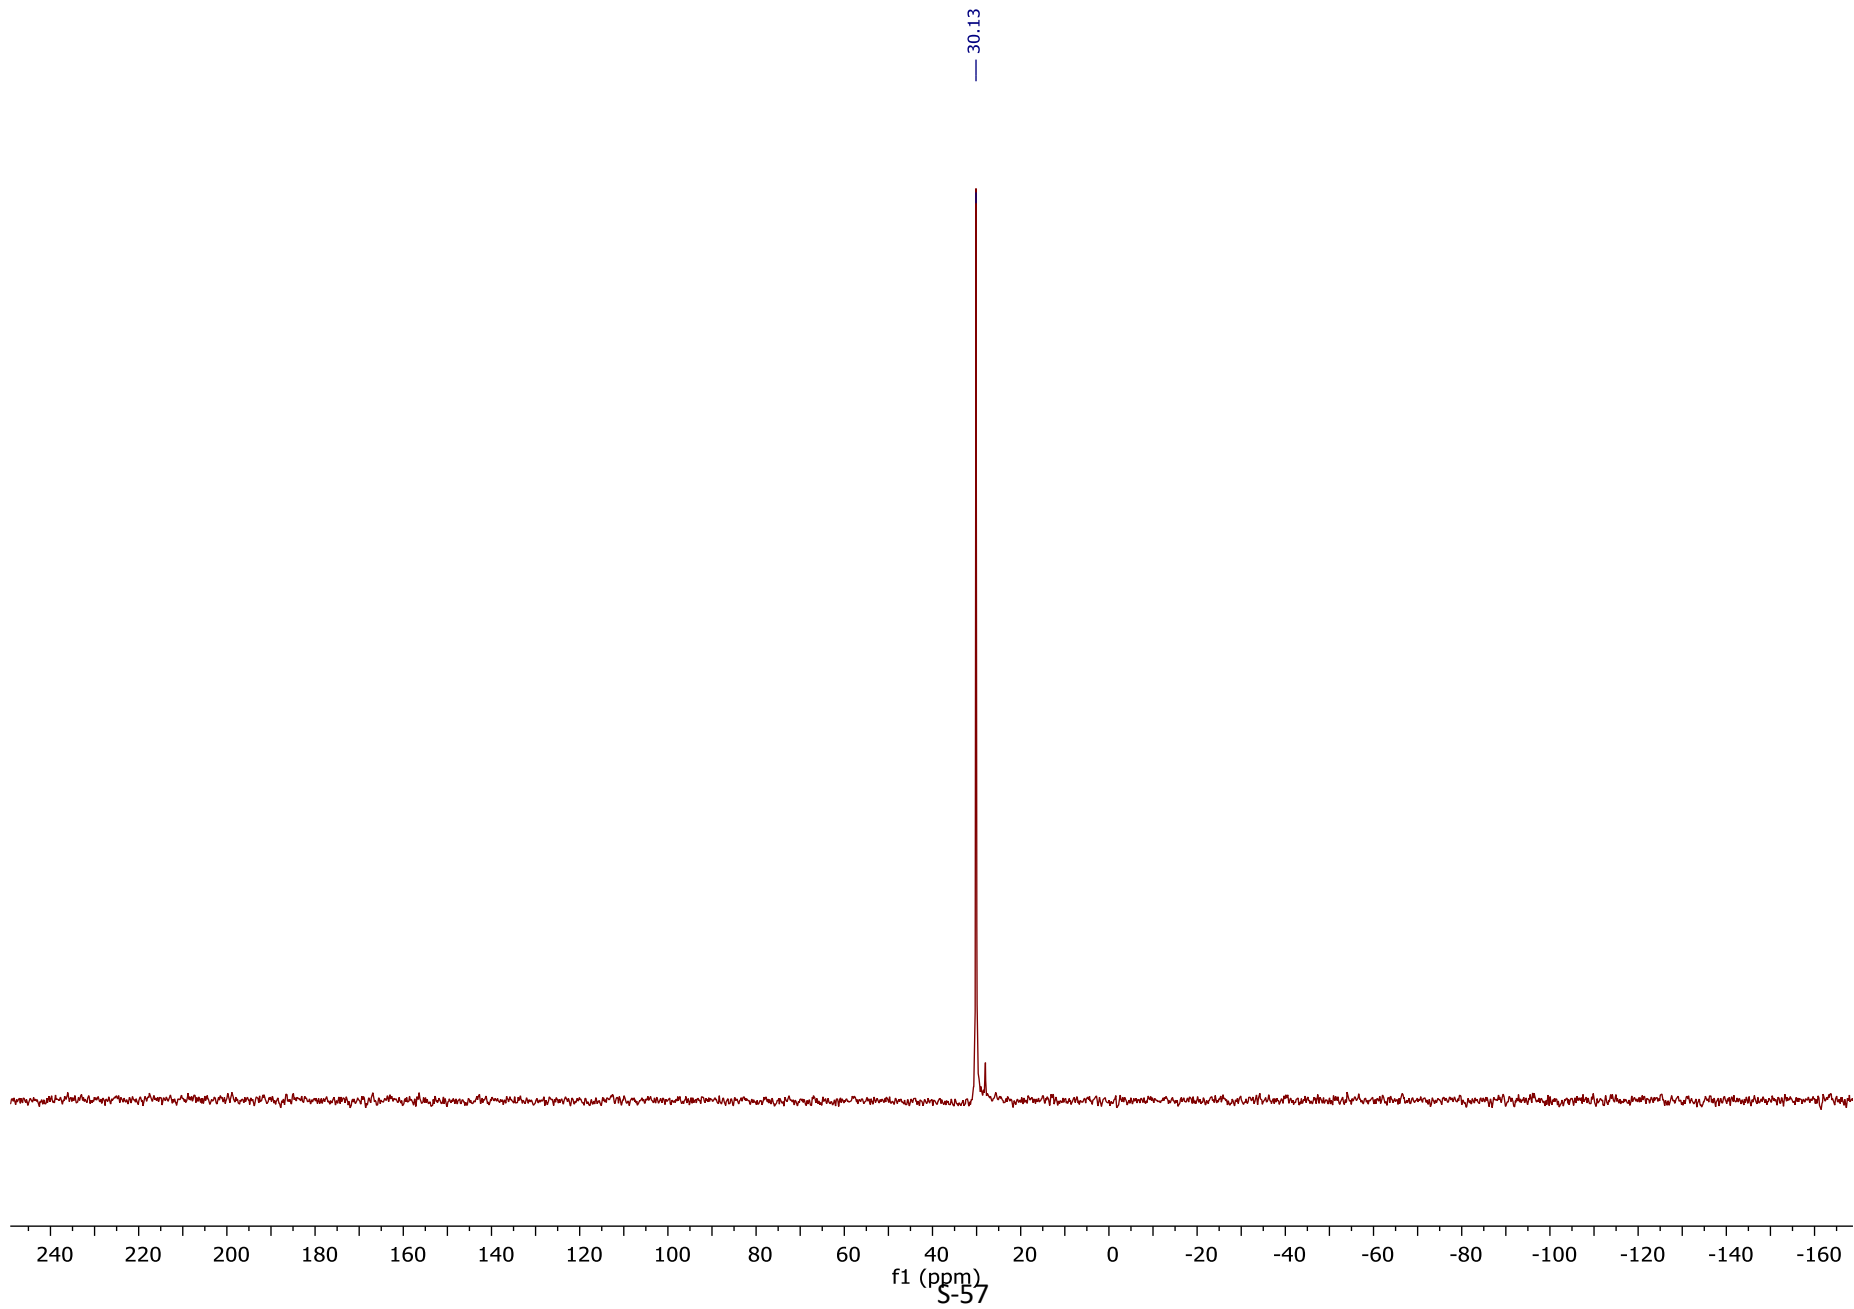

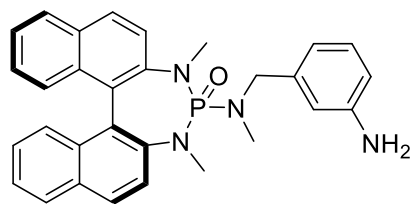

5b

7.98  
7.95  
7.76  
7.73  
7.44  
7.41  
7.22  
7.22  
7.21  
7.19  
7.13  
7.12  
7.11  
7.07  
6.71  
6.62  
6.59

4.24  
4.21  
4.19  
4.16  
4.06  
4.03  
4.01  
3.98

3.08  
3.08  
3.05  
3.02

2.22  
2.19

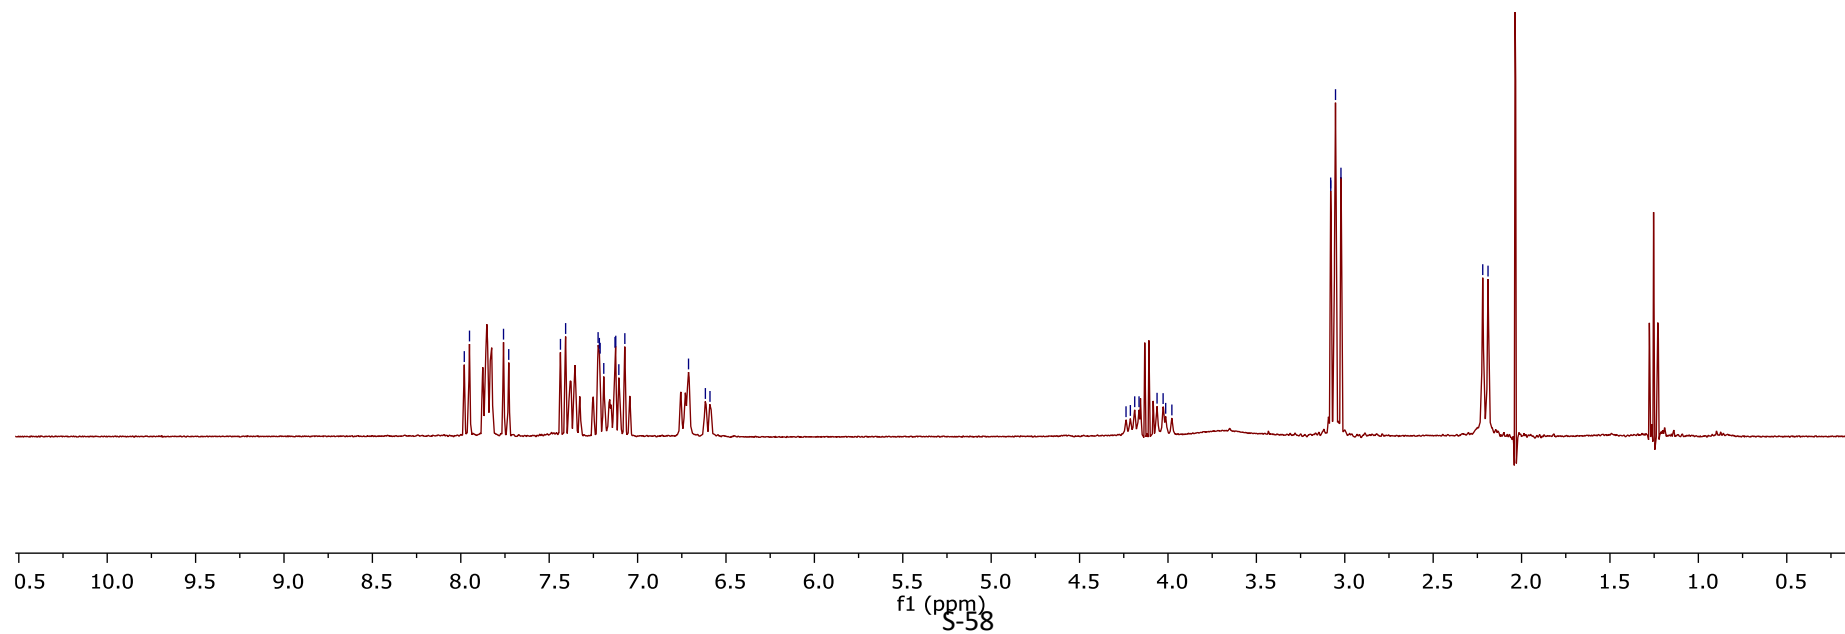

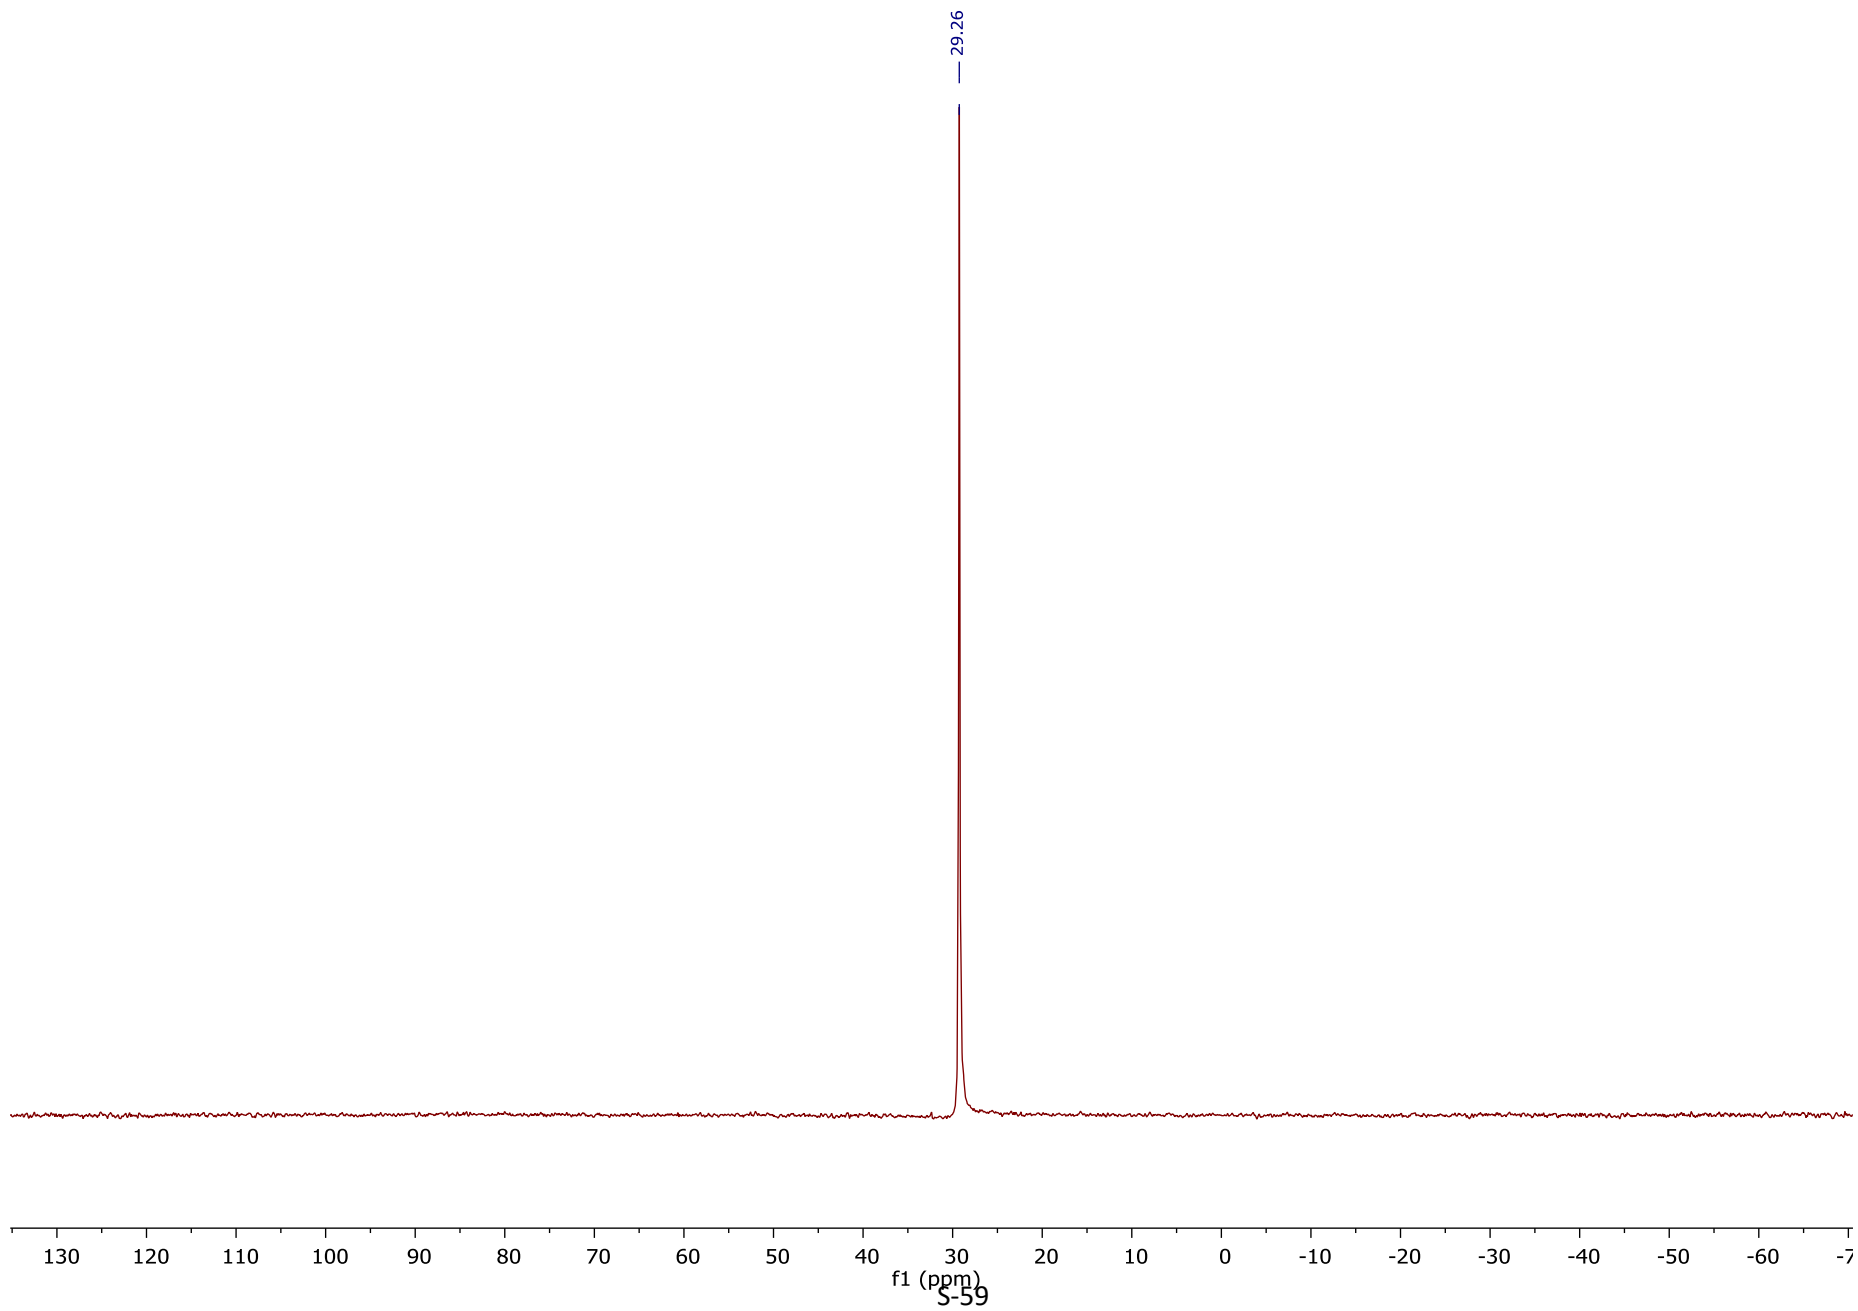

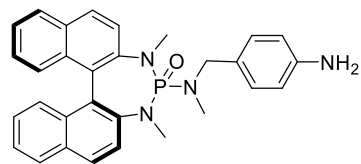

5c

7.98  
7.95  
7.87  
7.85  
7.83  
7.82  
7.76  
7.73  
7.42  
7.39  
7.38  
7.36  
7.25  
7.21  
7.18  
7.15  
6.75  
6.73

4.24  
4.21  
4.17  
4.13  
4.07  
4.04  
4.02  
3.99

3.05  
3.03  
3.02  
3.00

2.15  
2.12

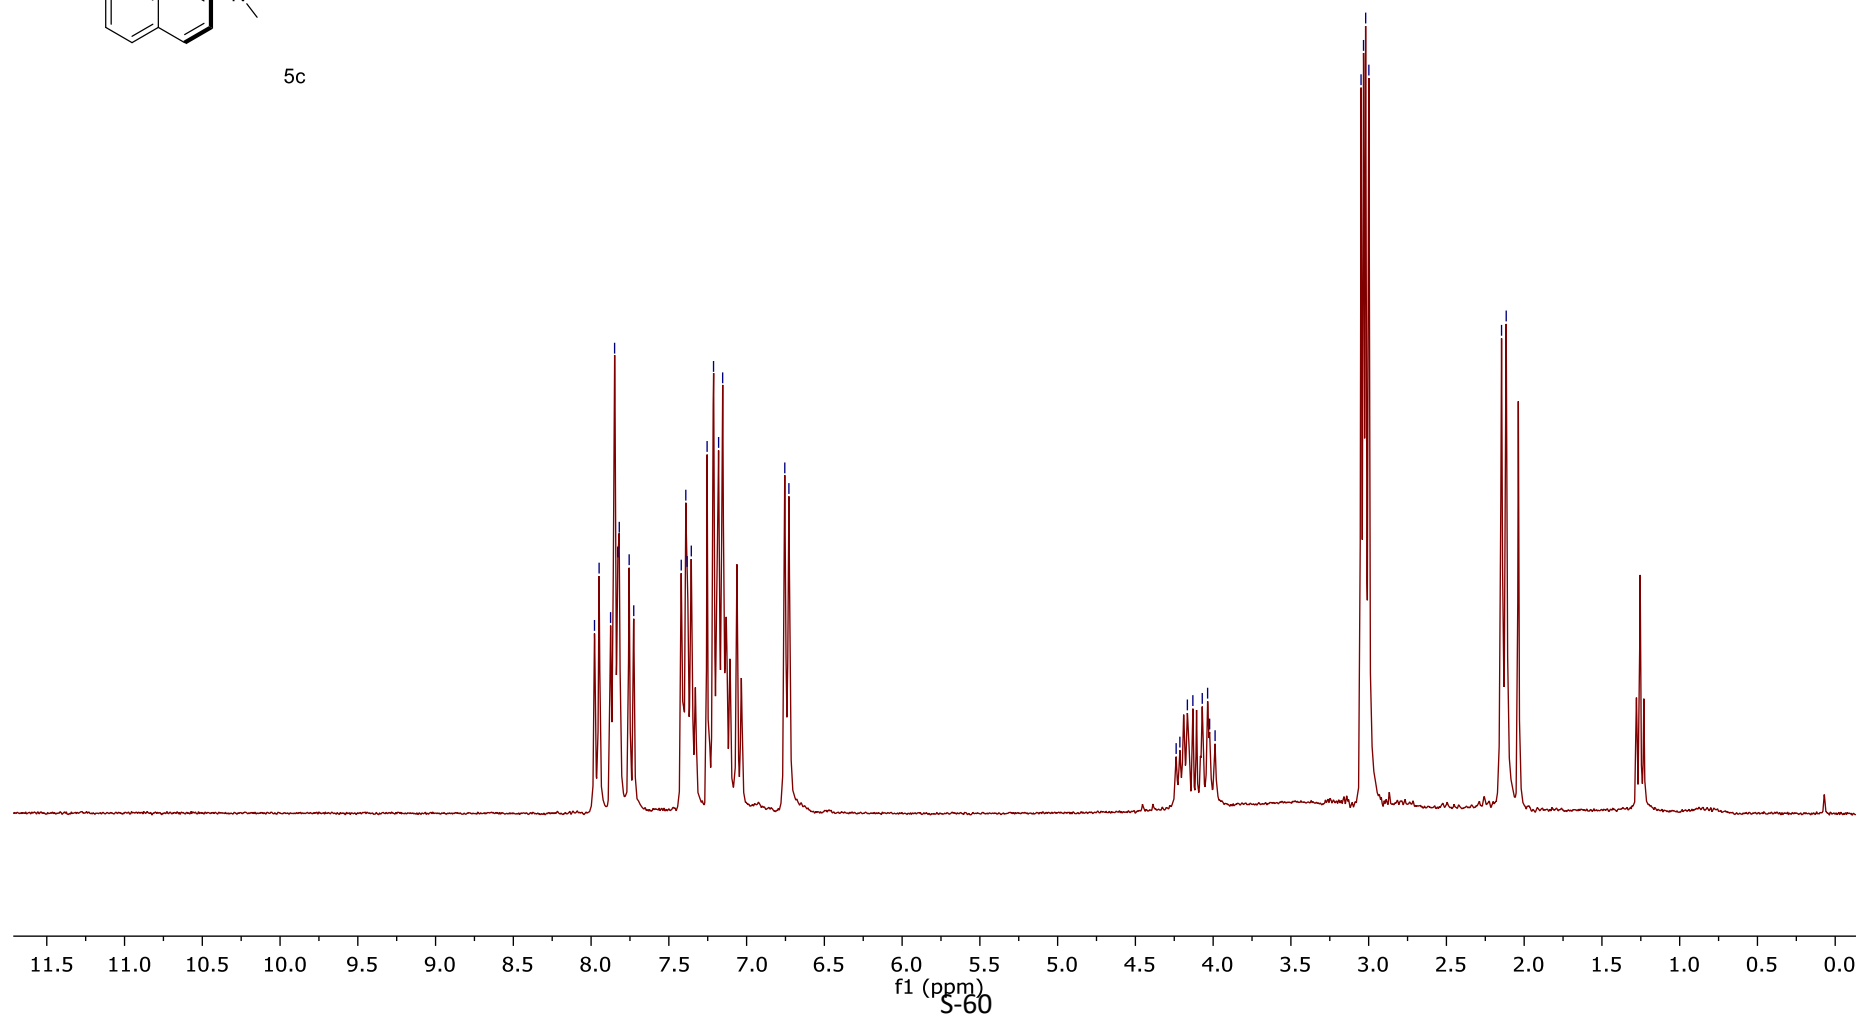

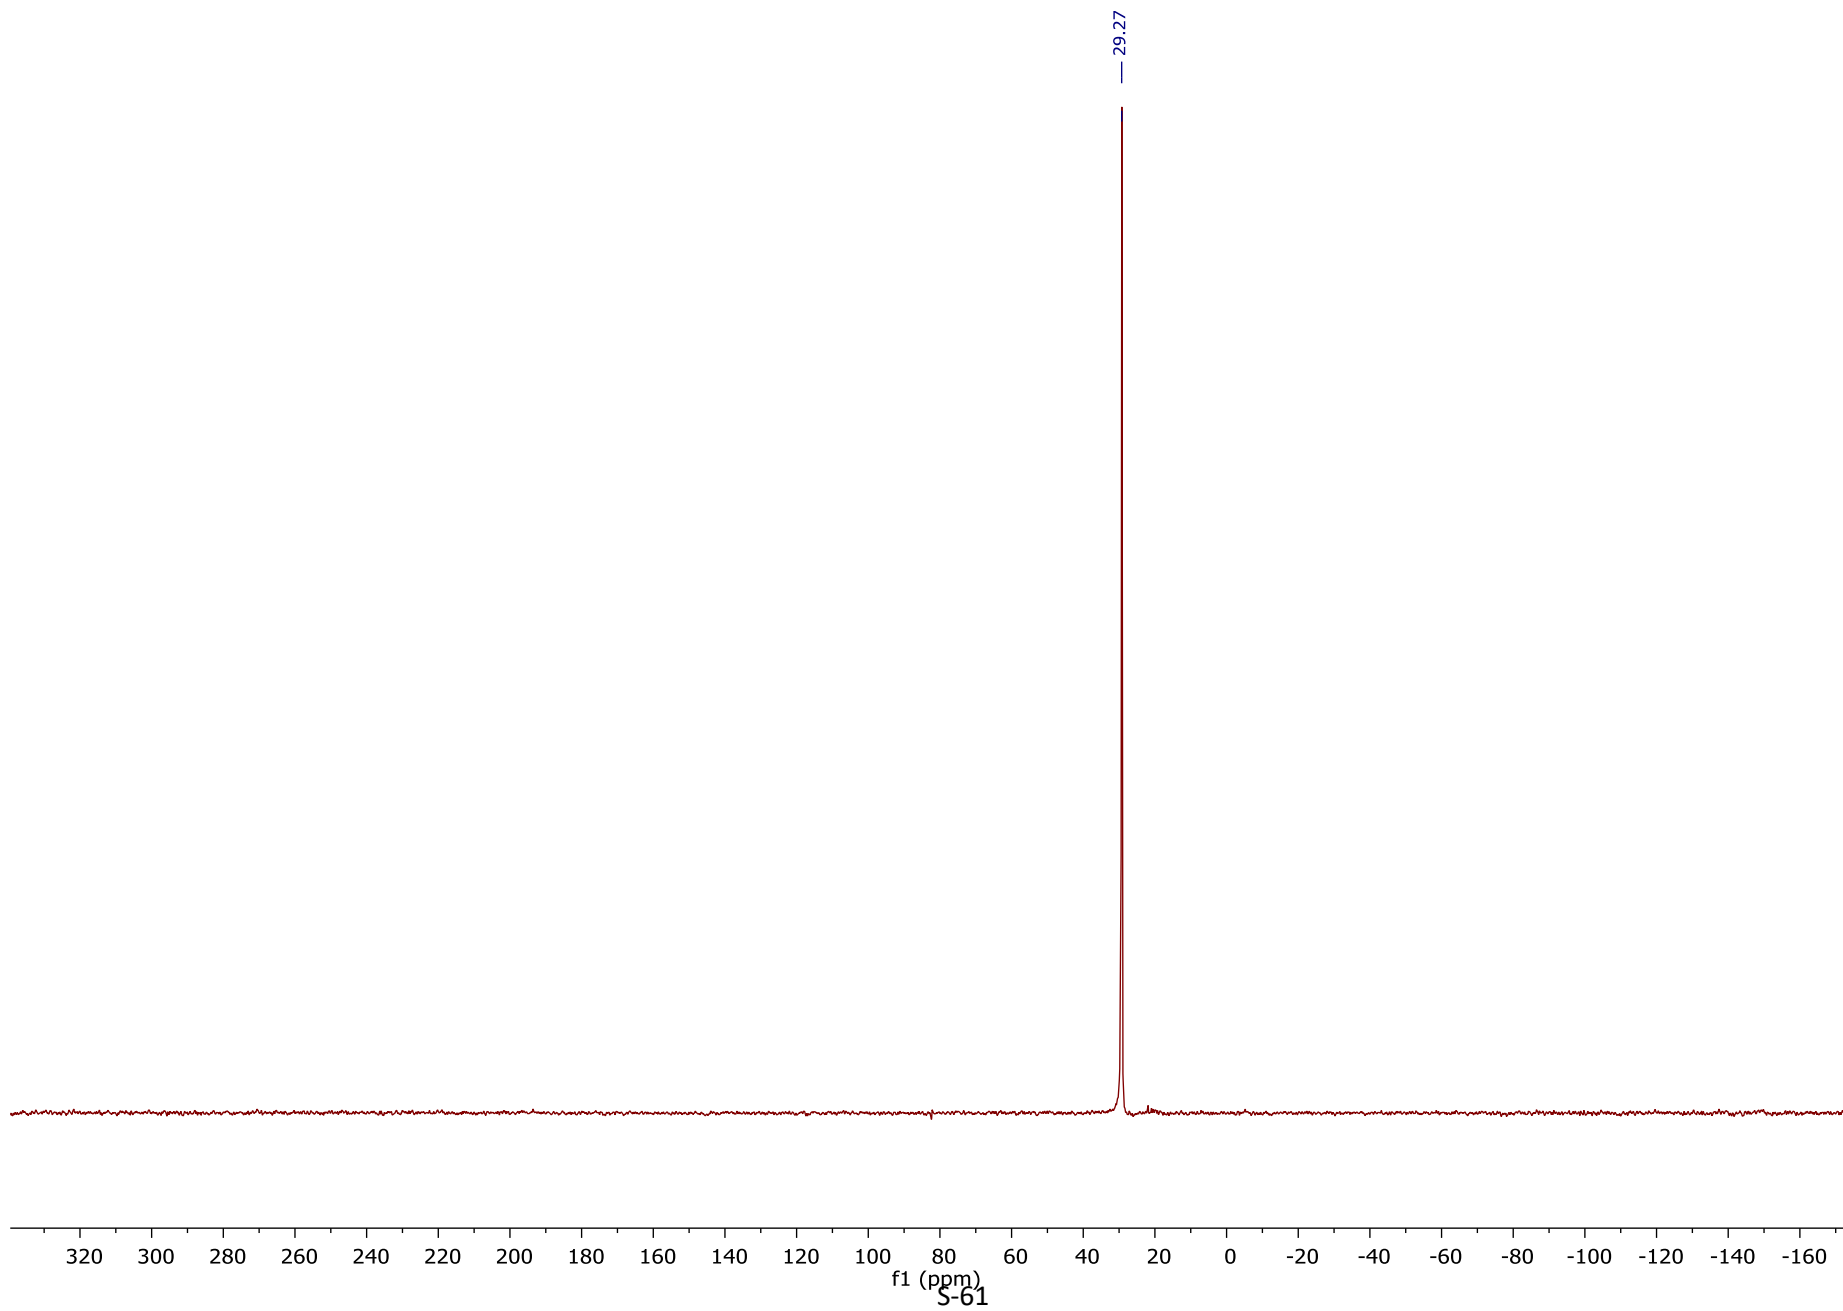

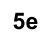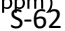

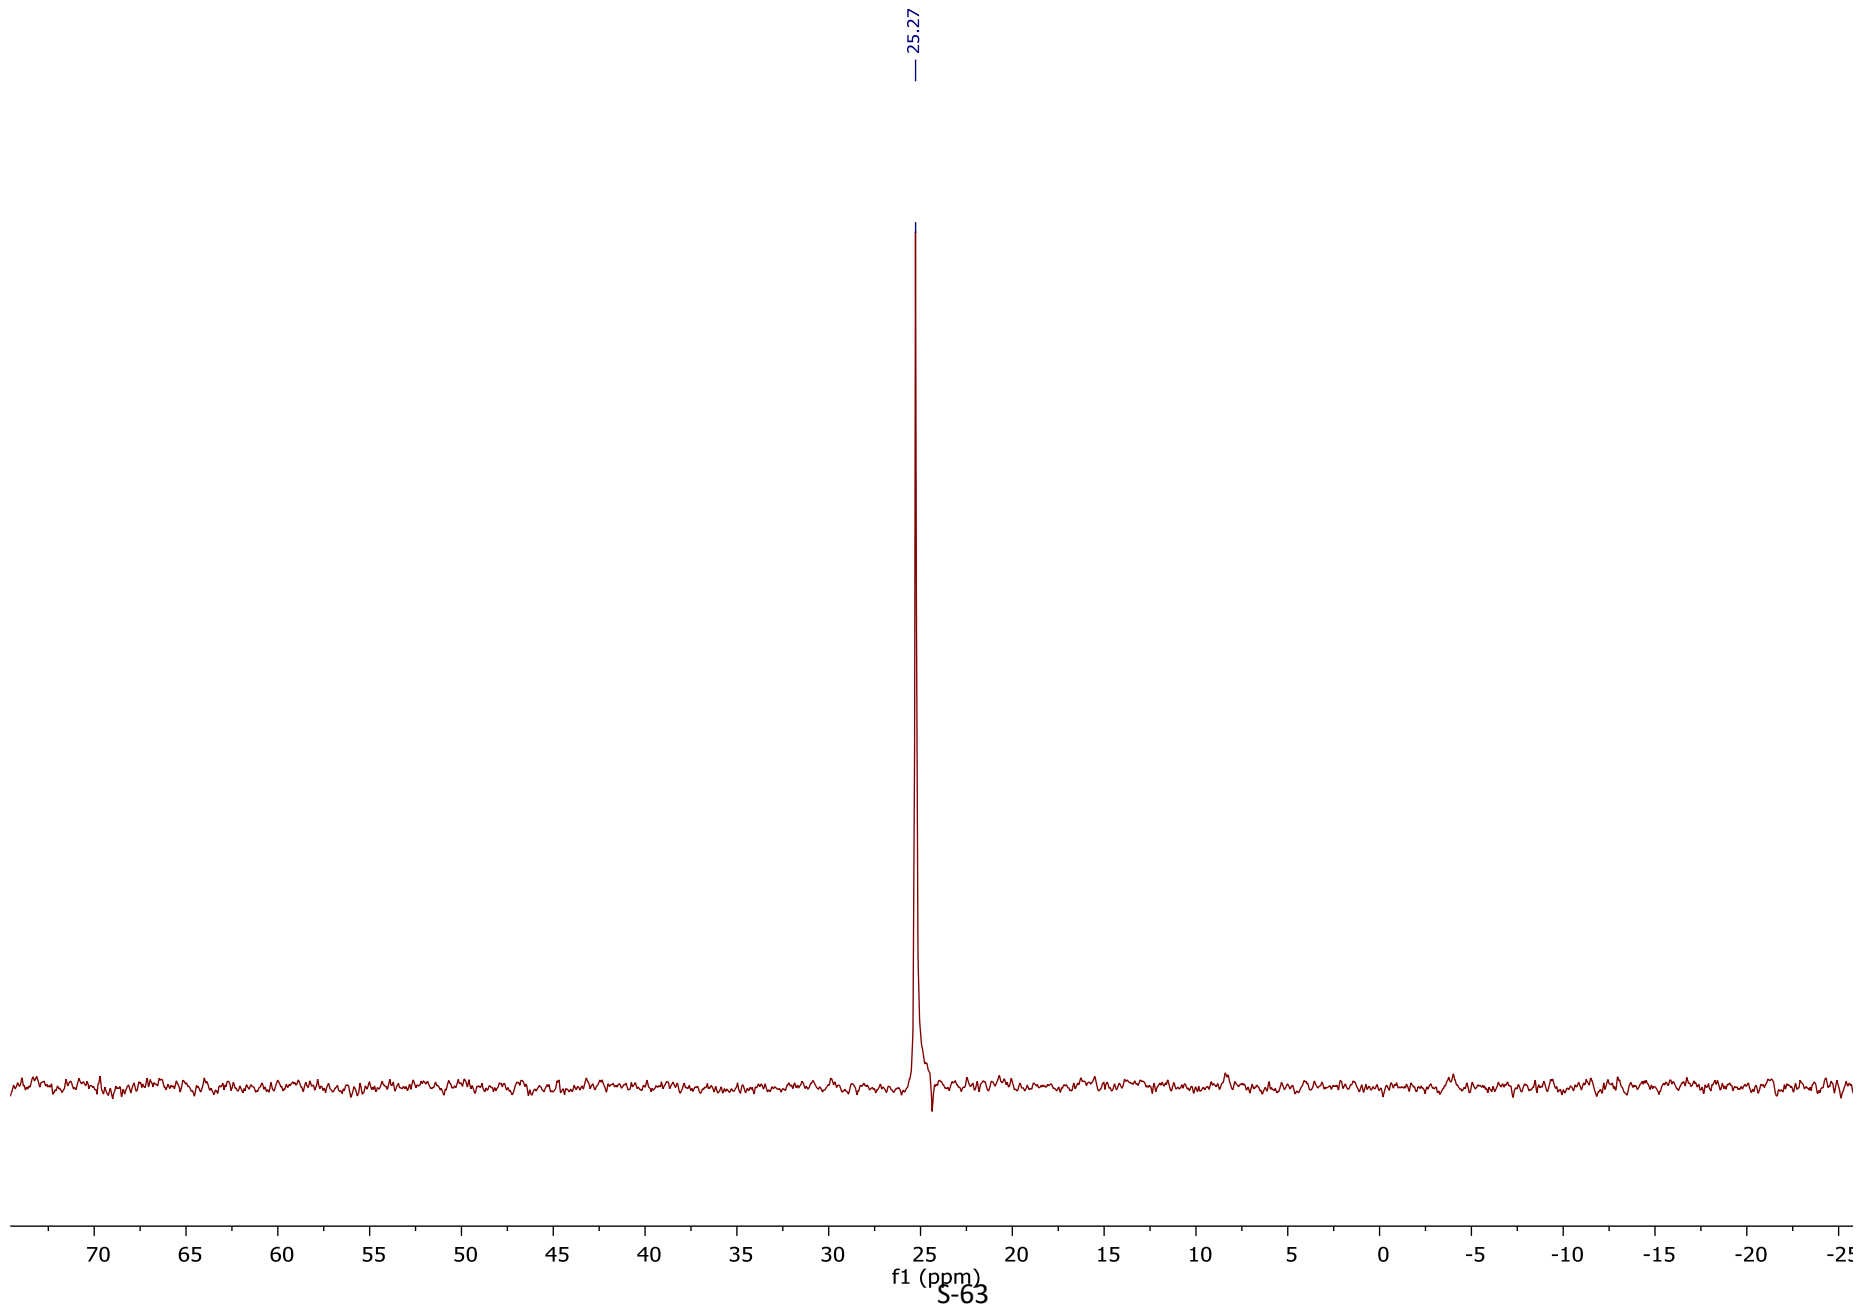

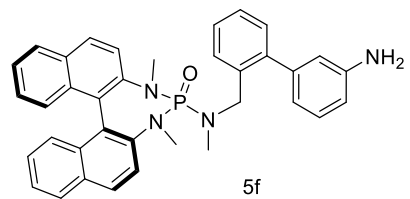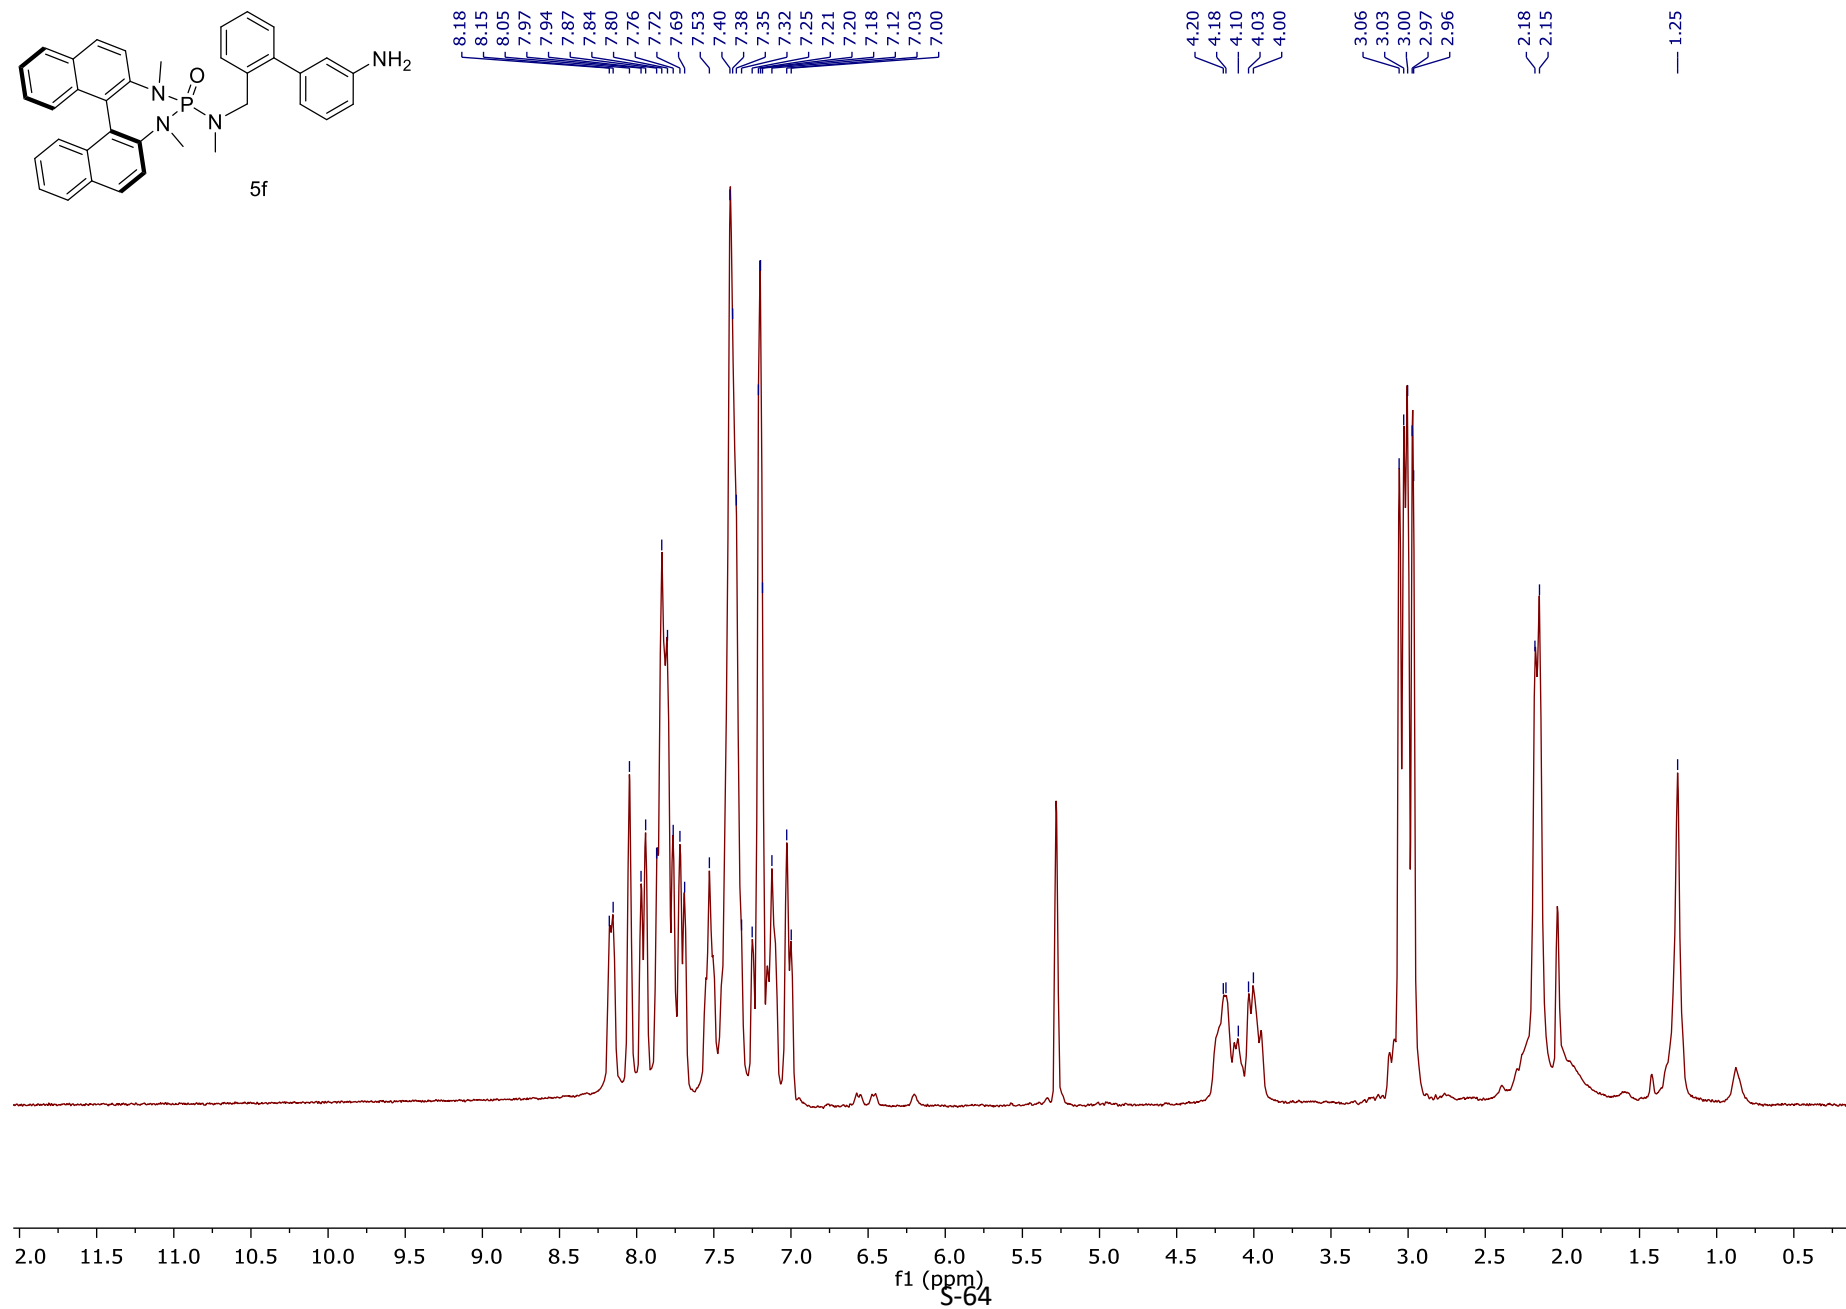

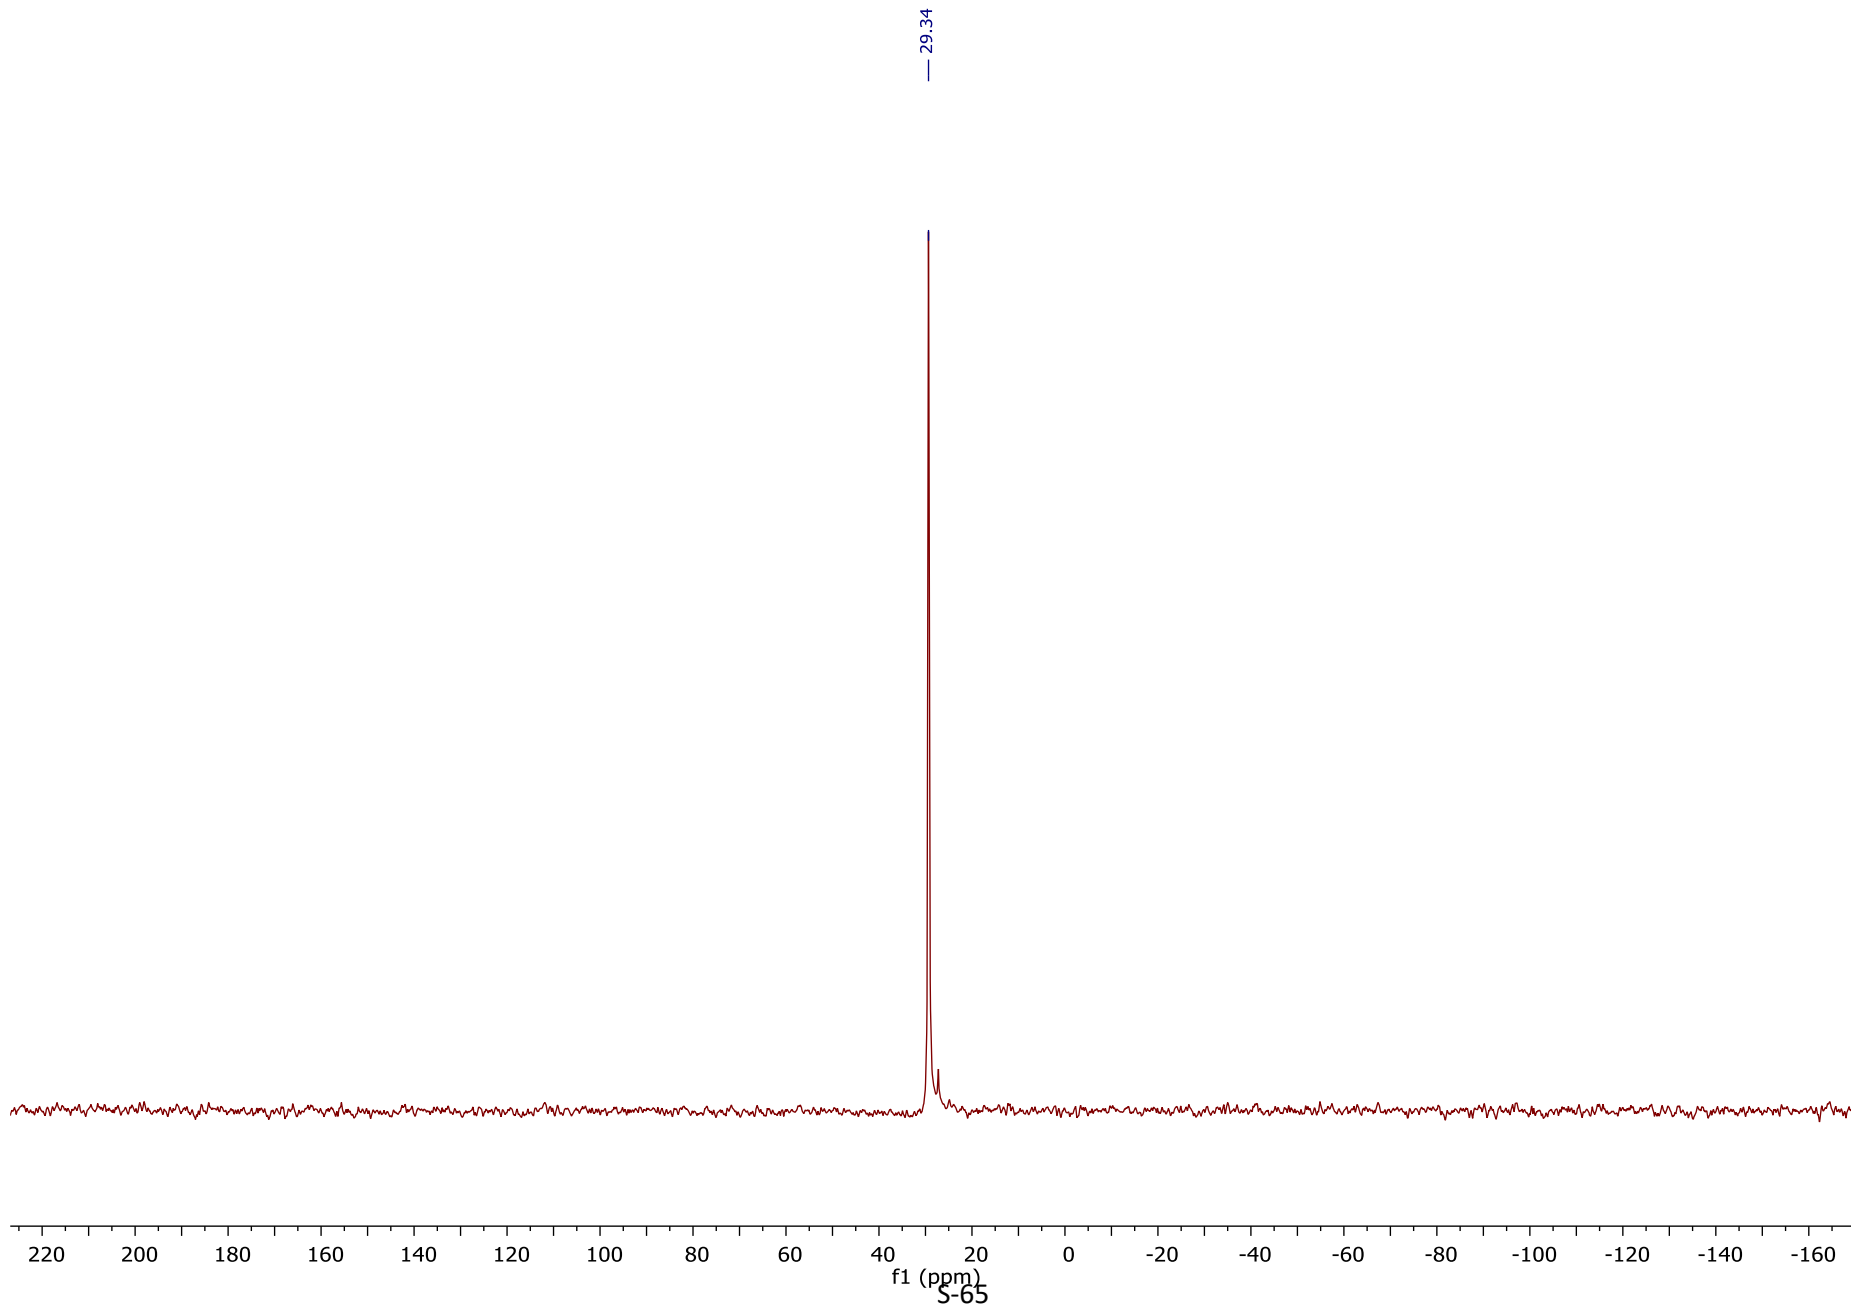

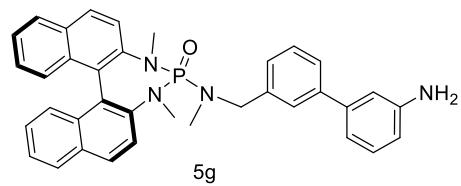

7.99  
7.96

6.68  
6.65

4.43  
4.41  
4.38  
4.36  
4.20  
4.16  
4.13  
4.12  
4.12  
4.11  
4.11  
4.10

3.07  
3.05

2.24  
2.21

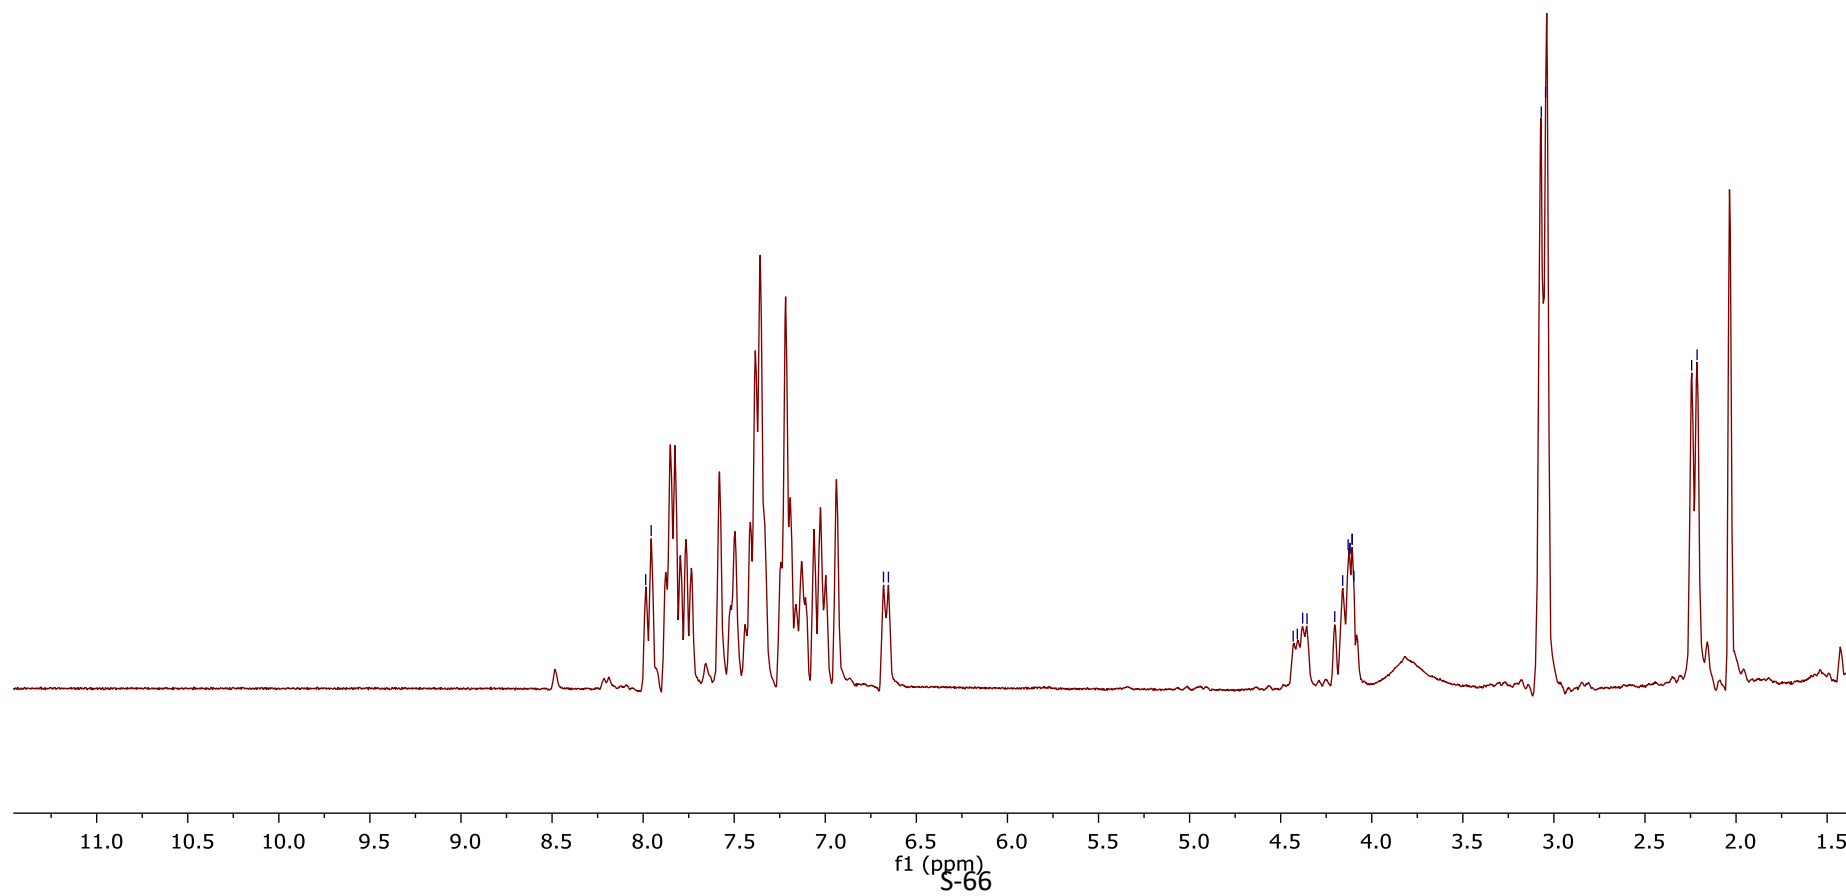

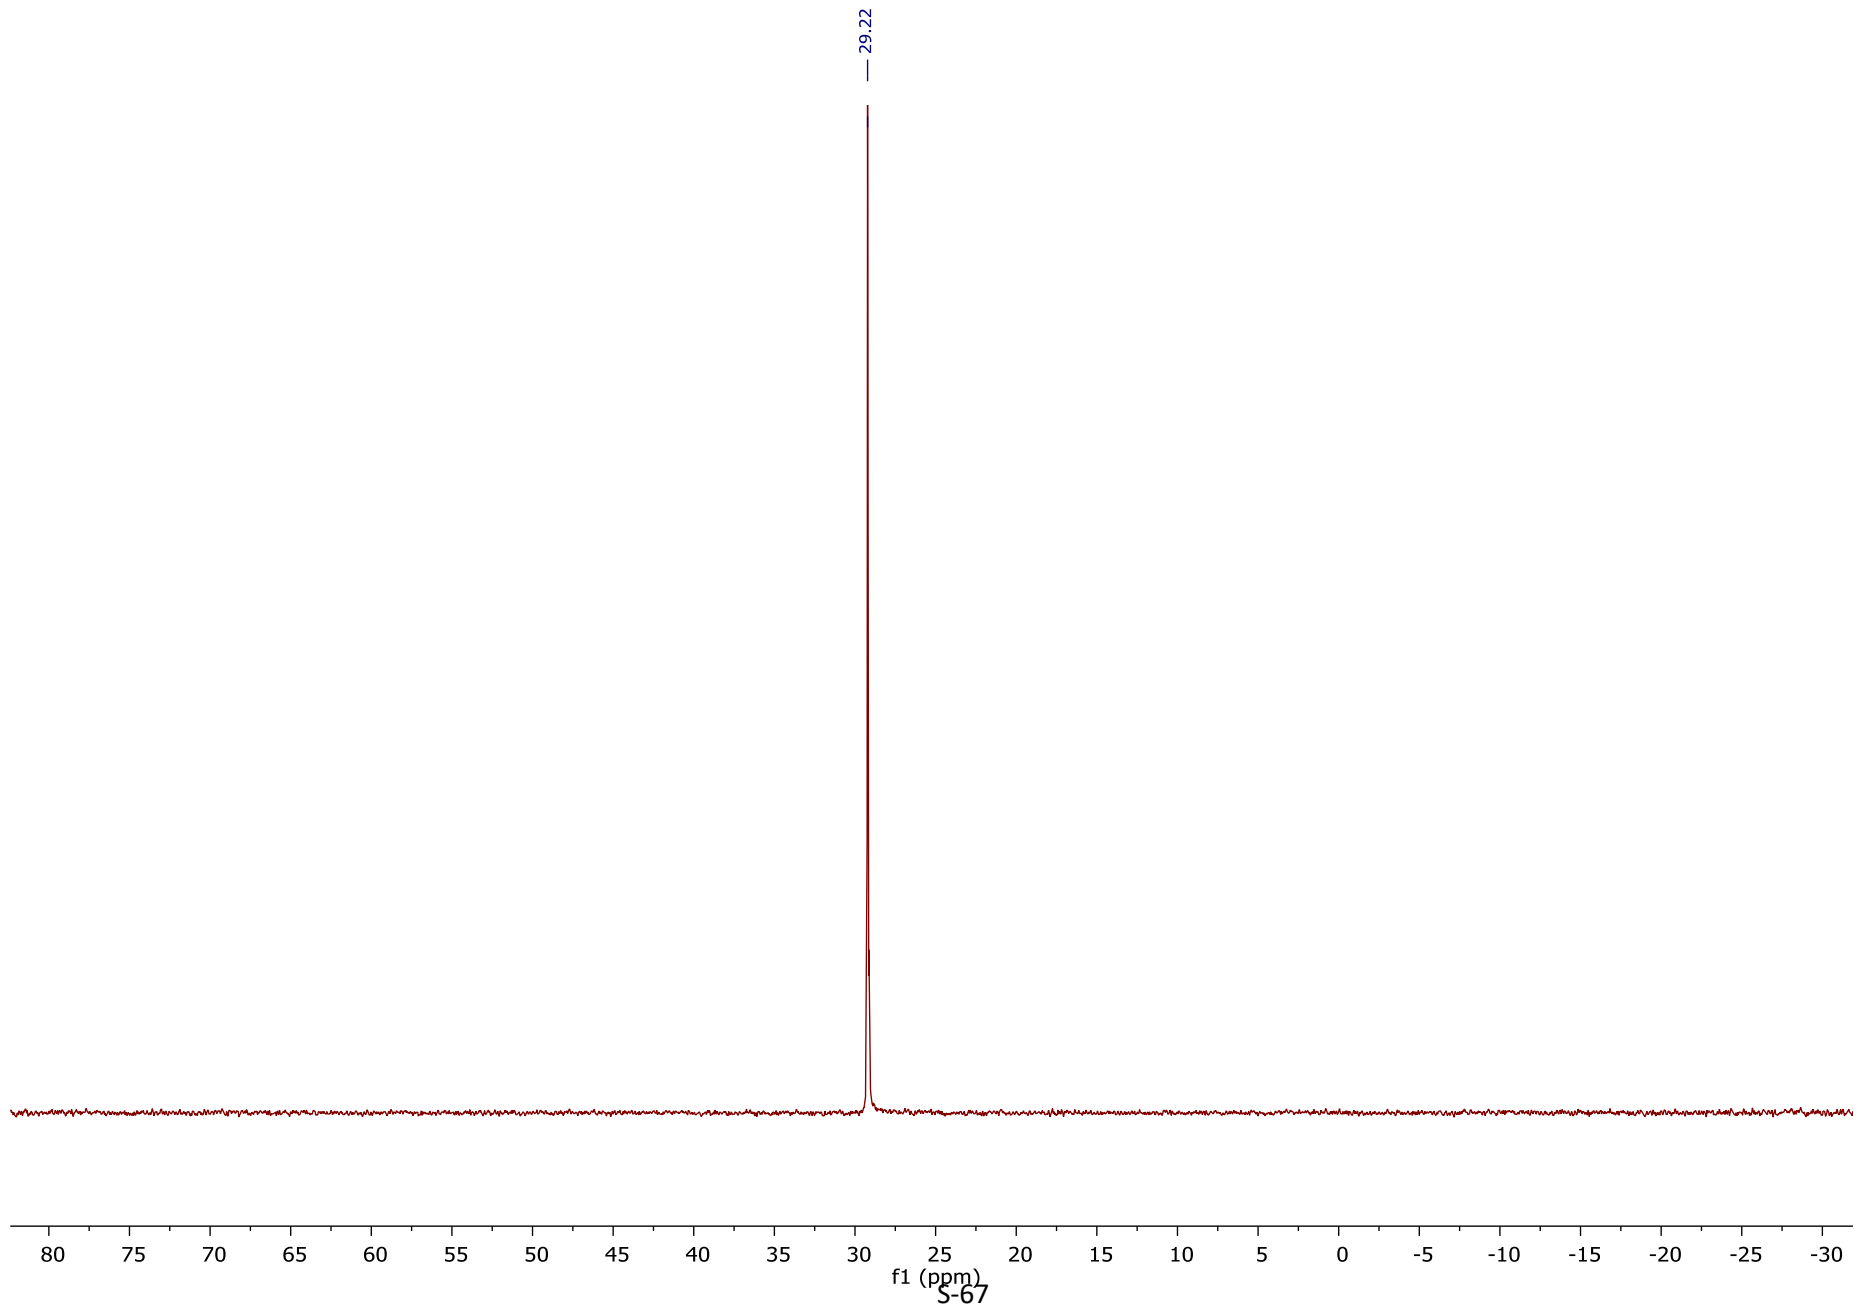

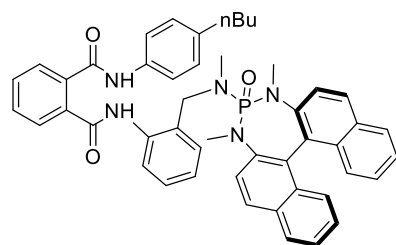

7a

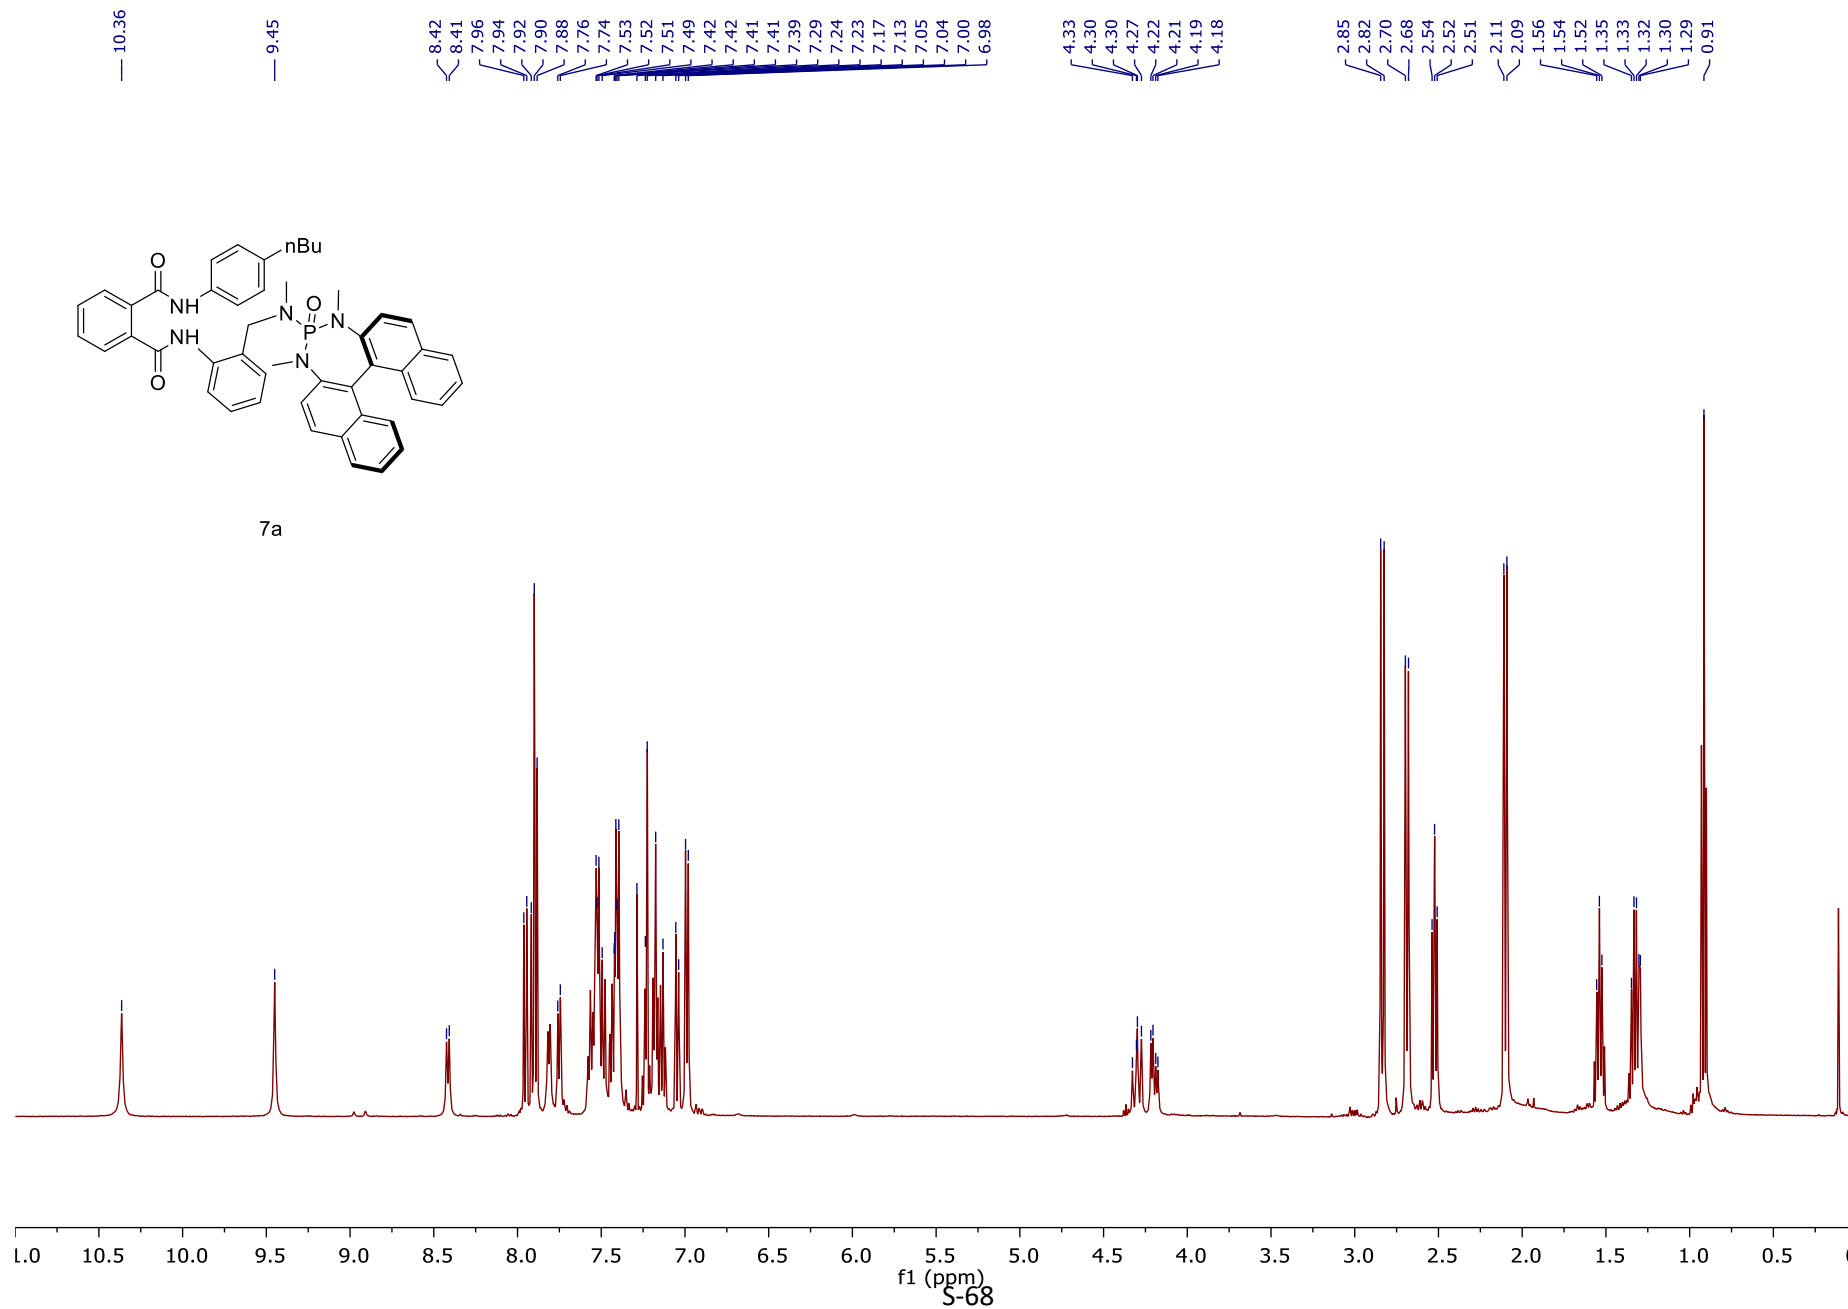

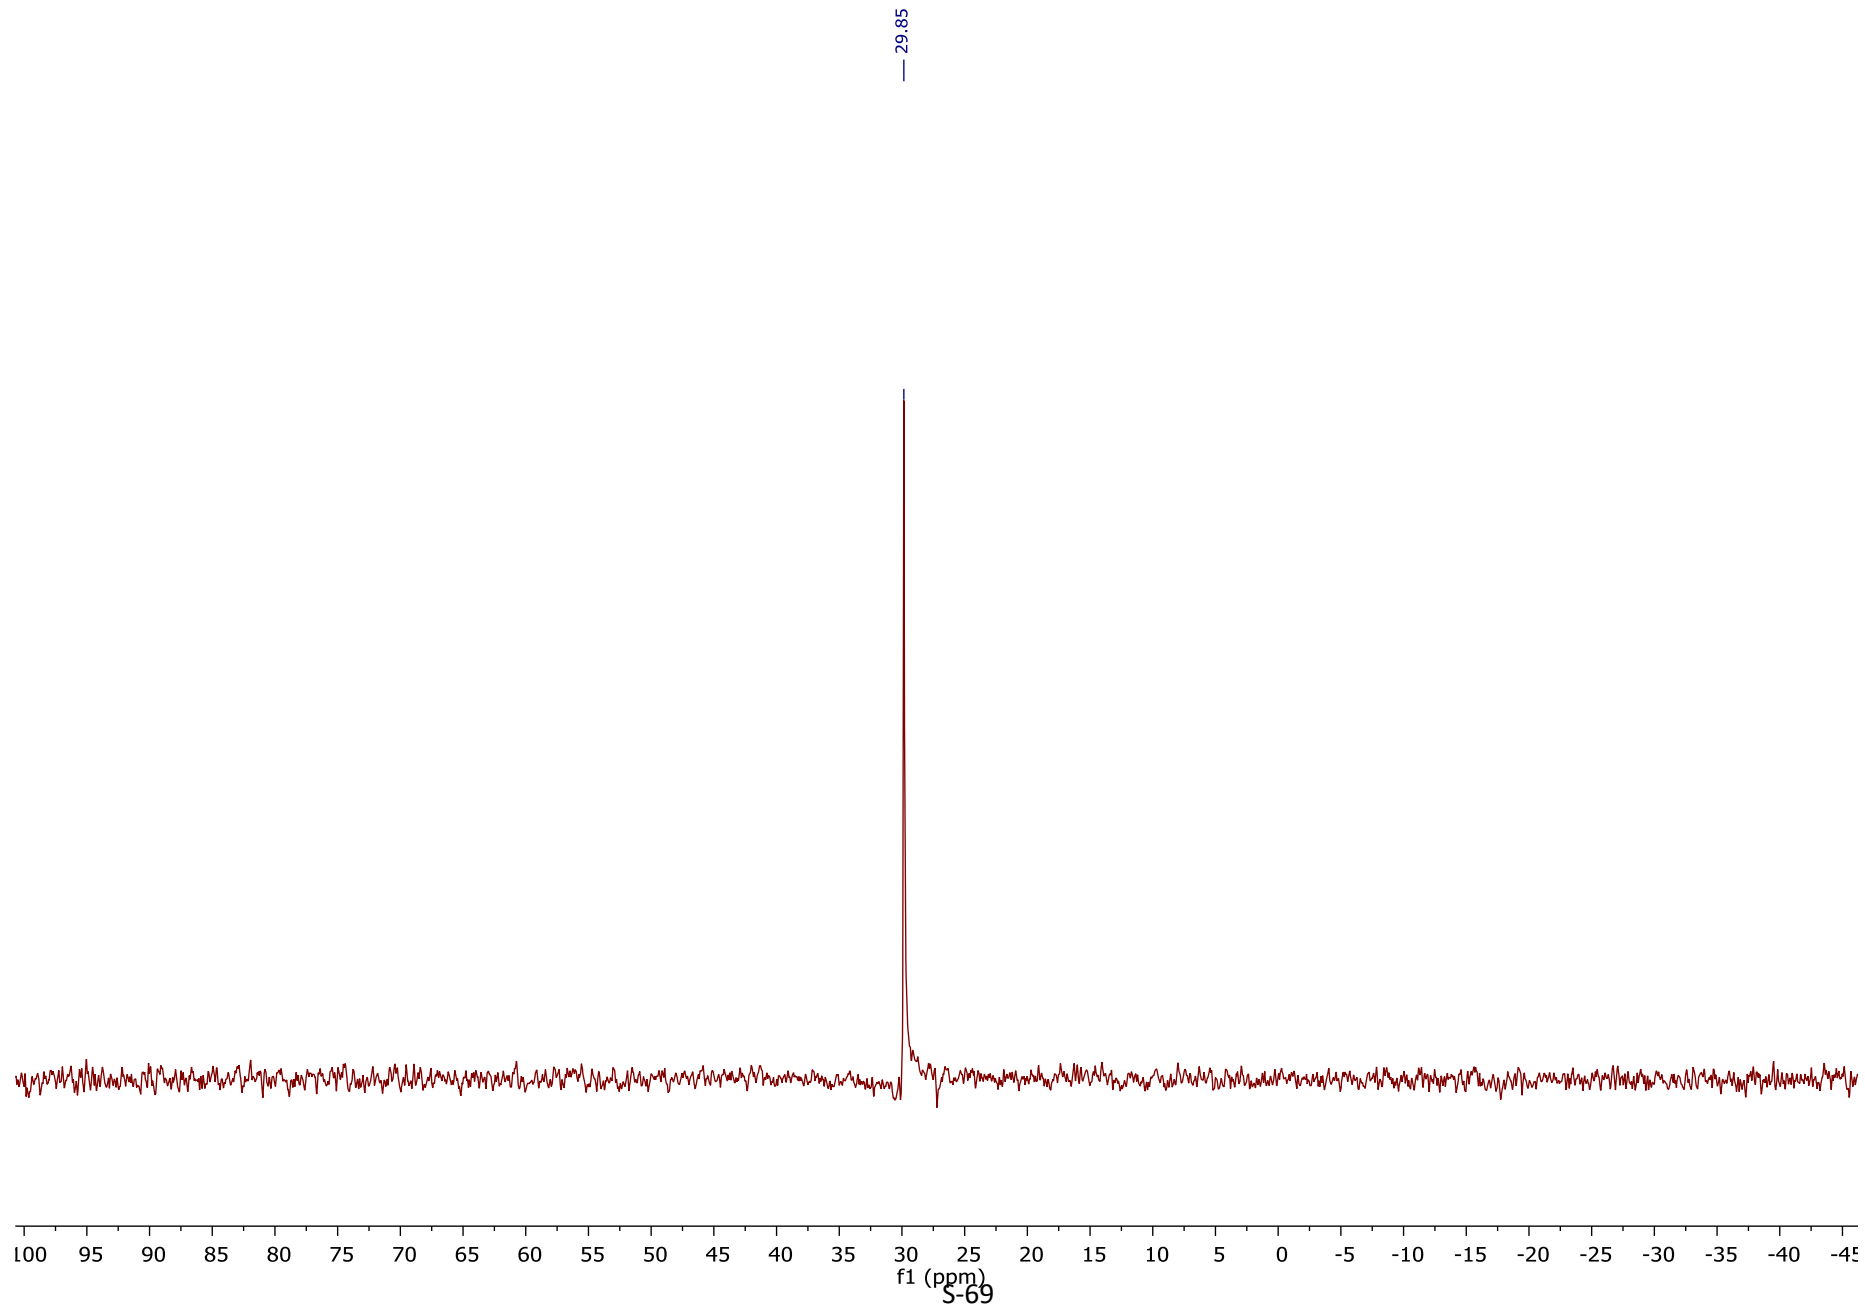

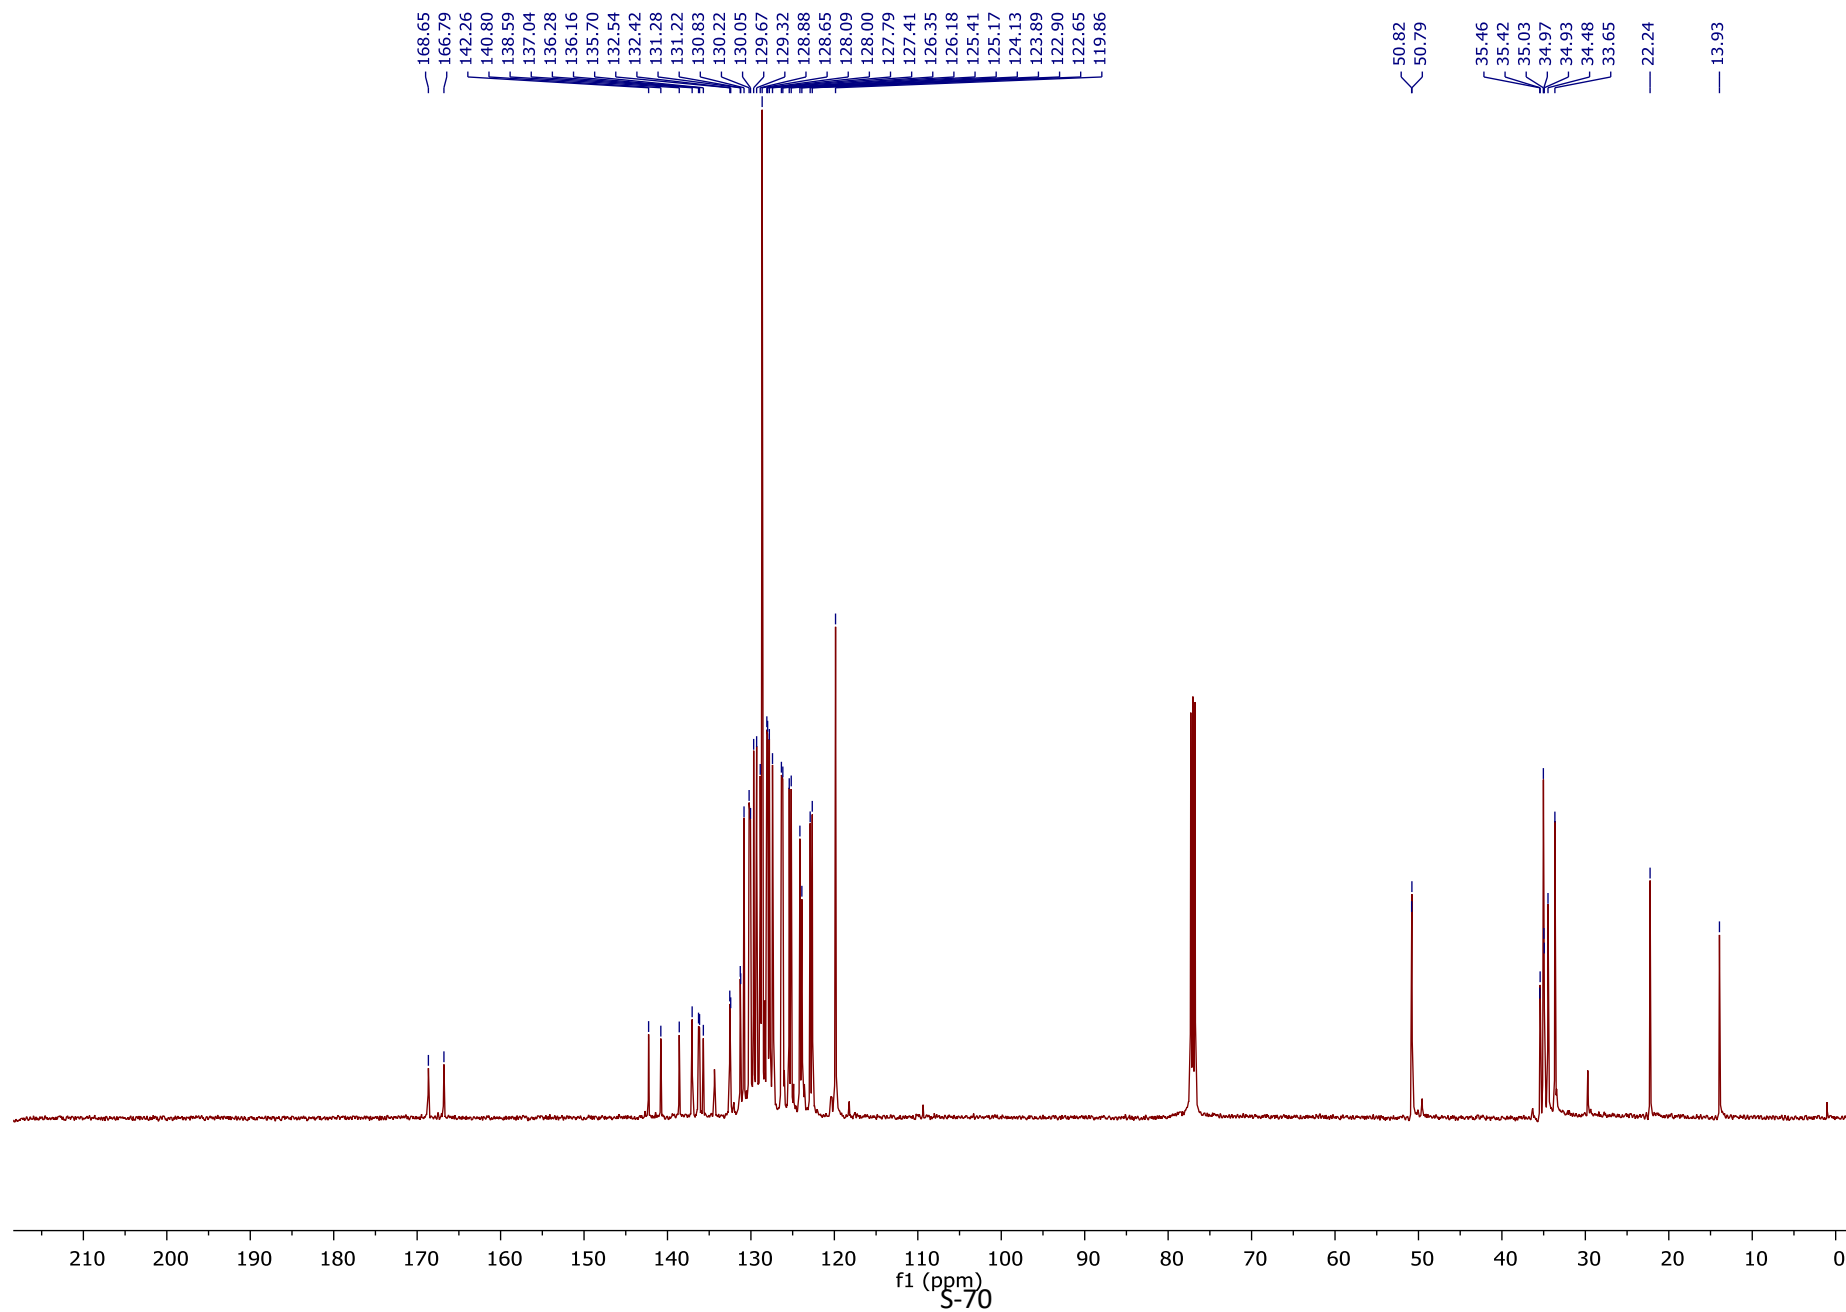

COSY

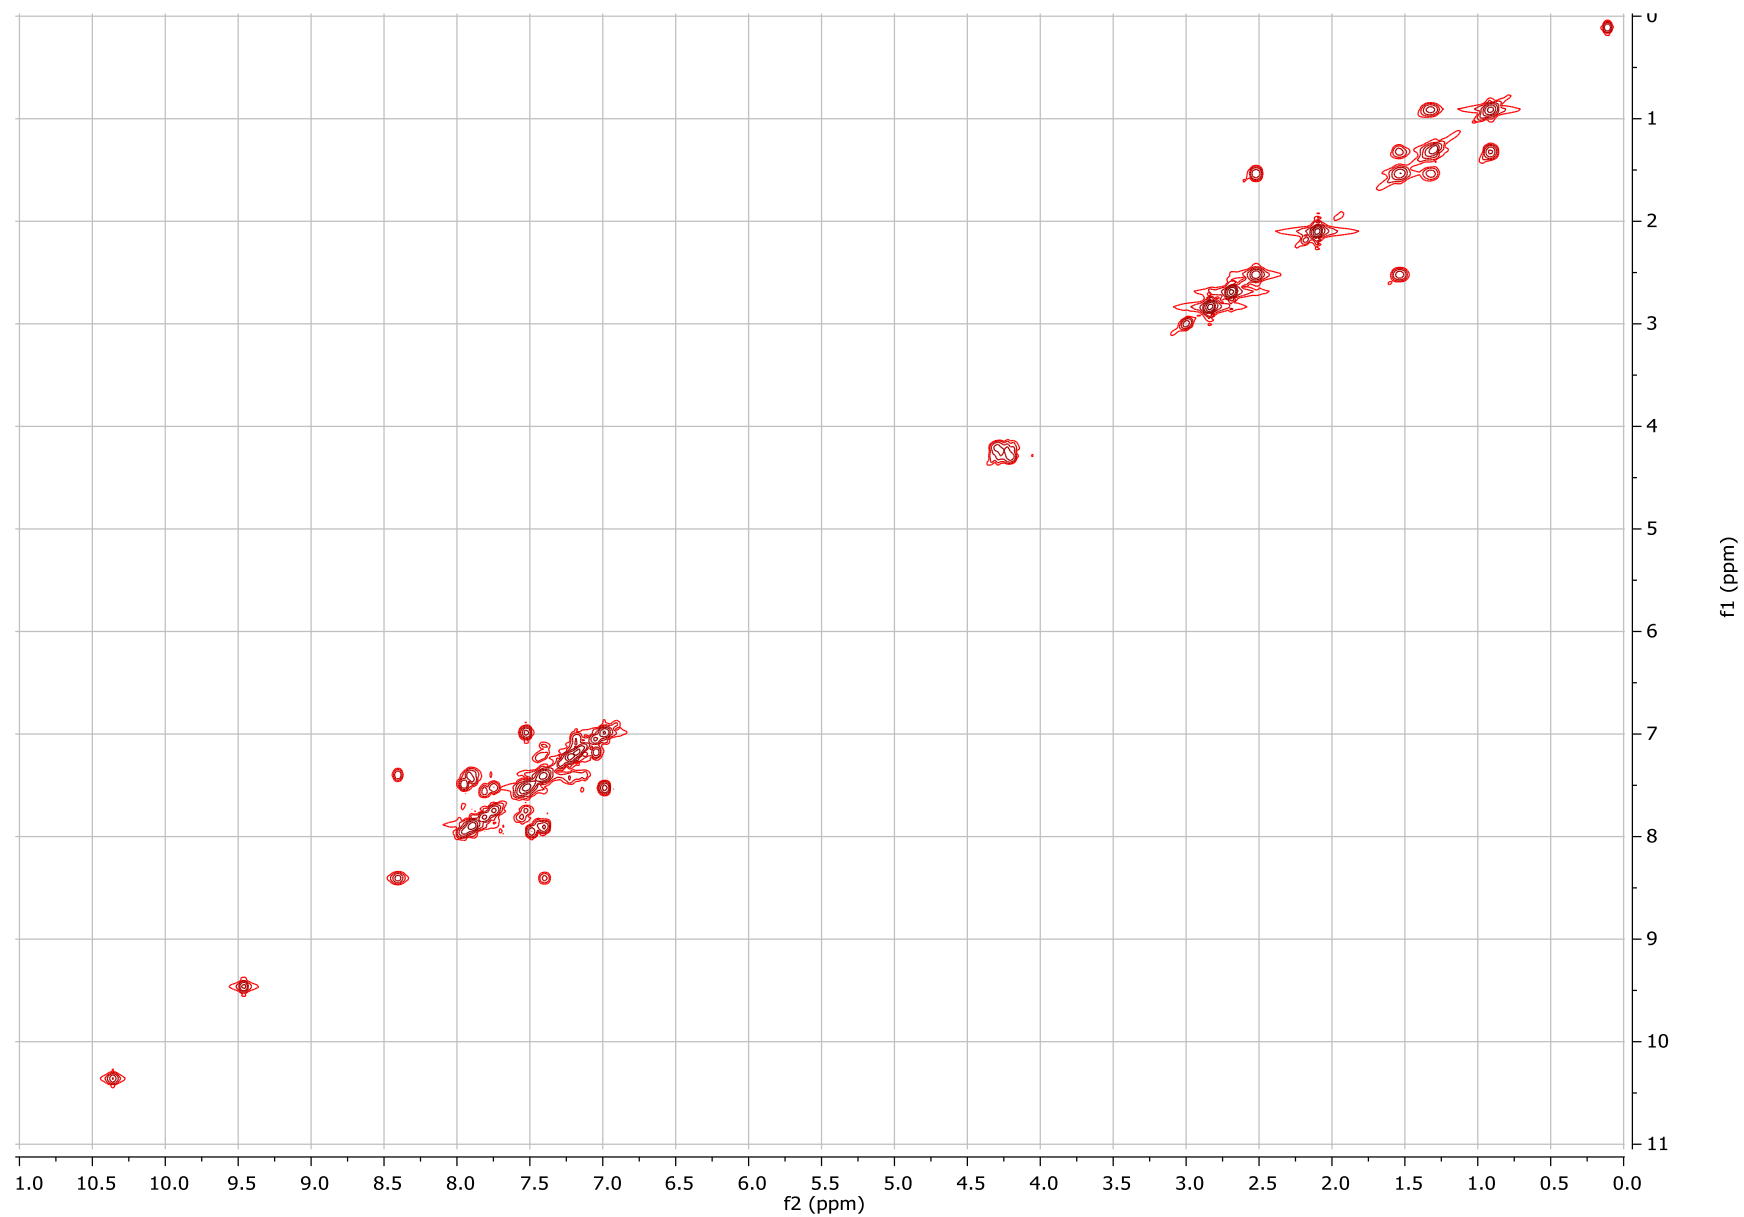

S-71

HSQC

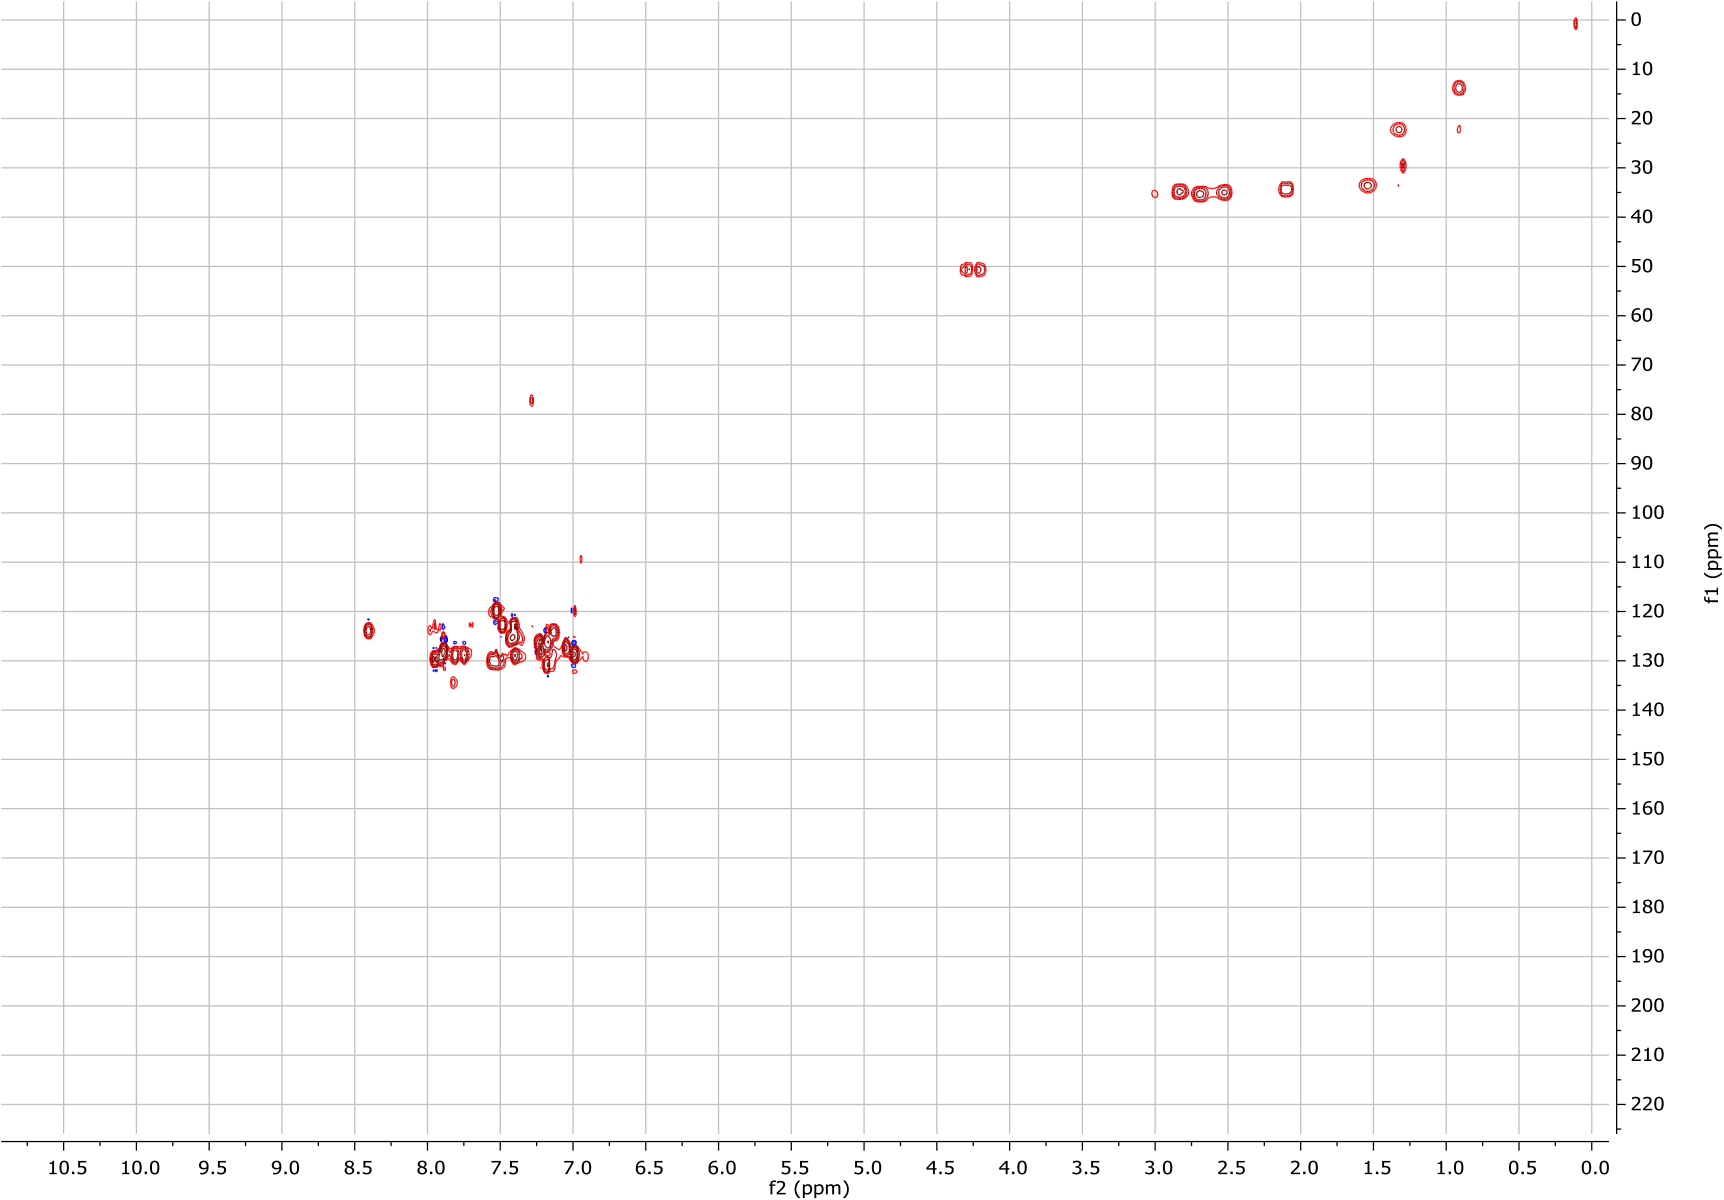

S-72

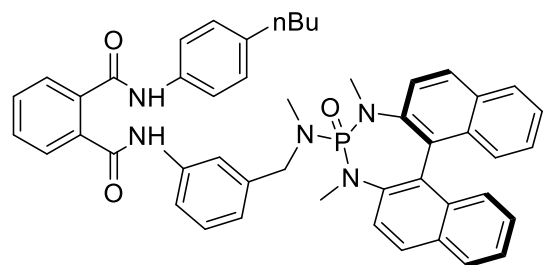

7b

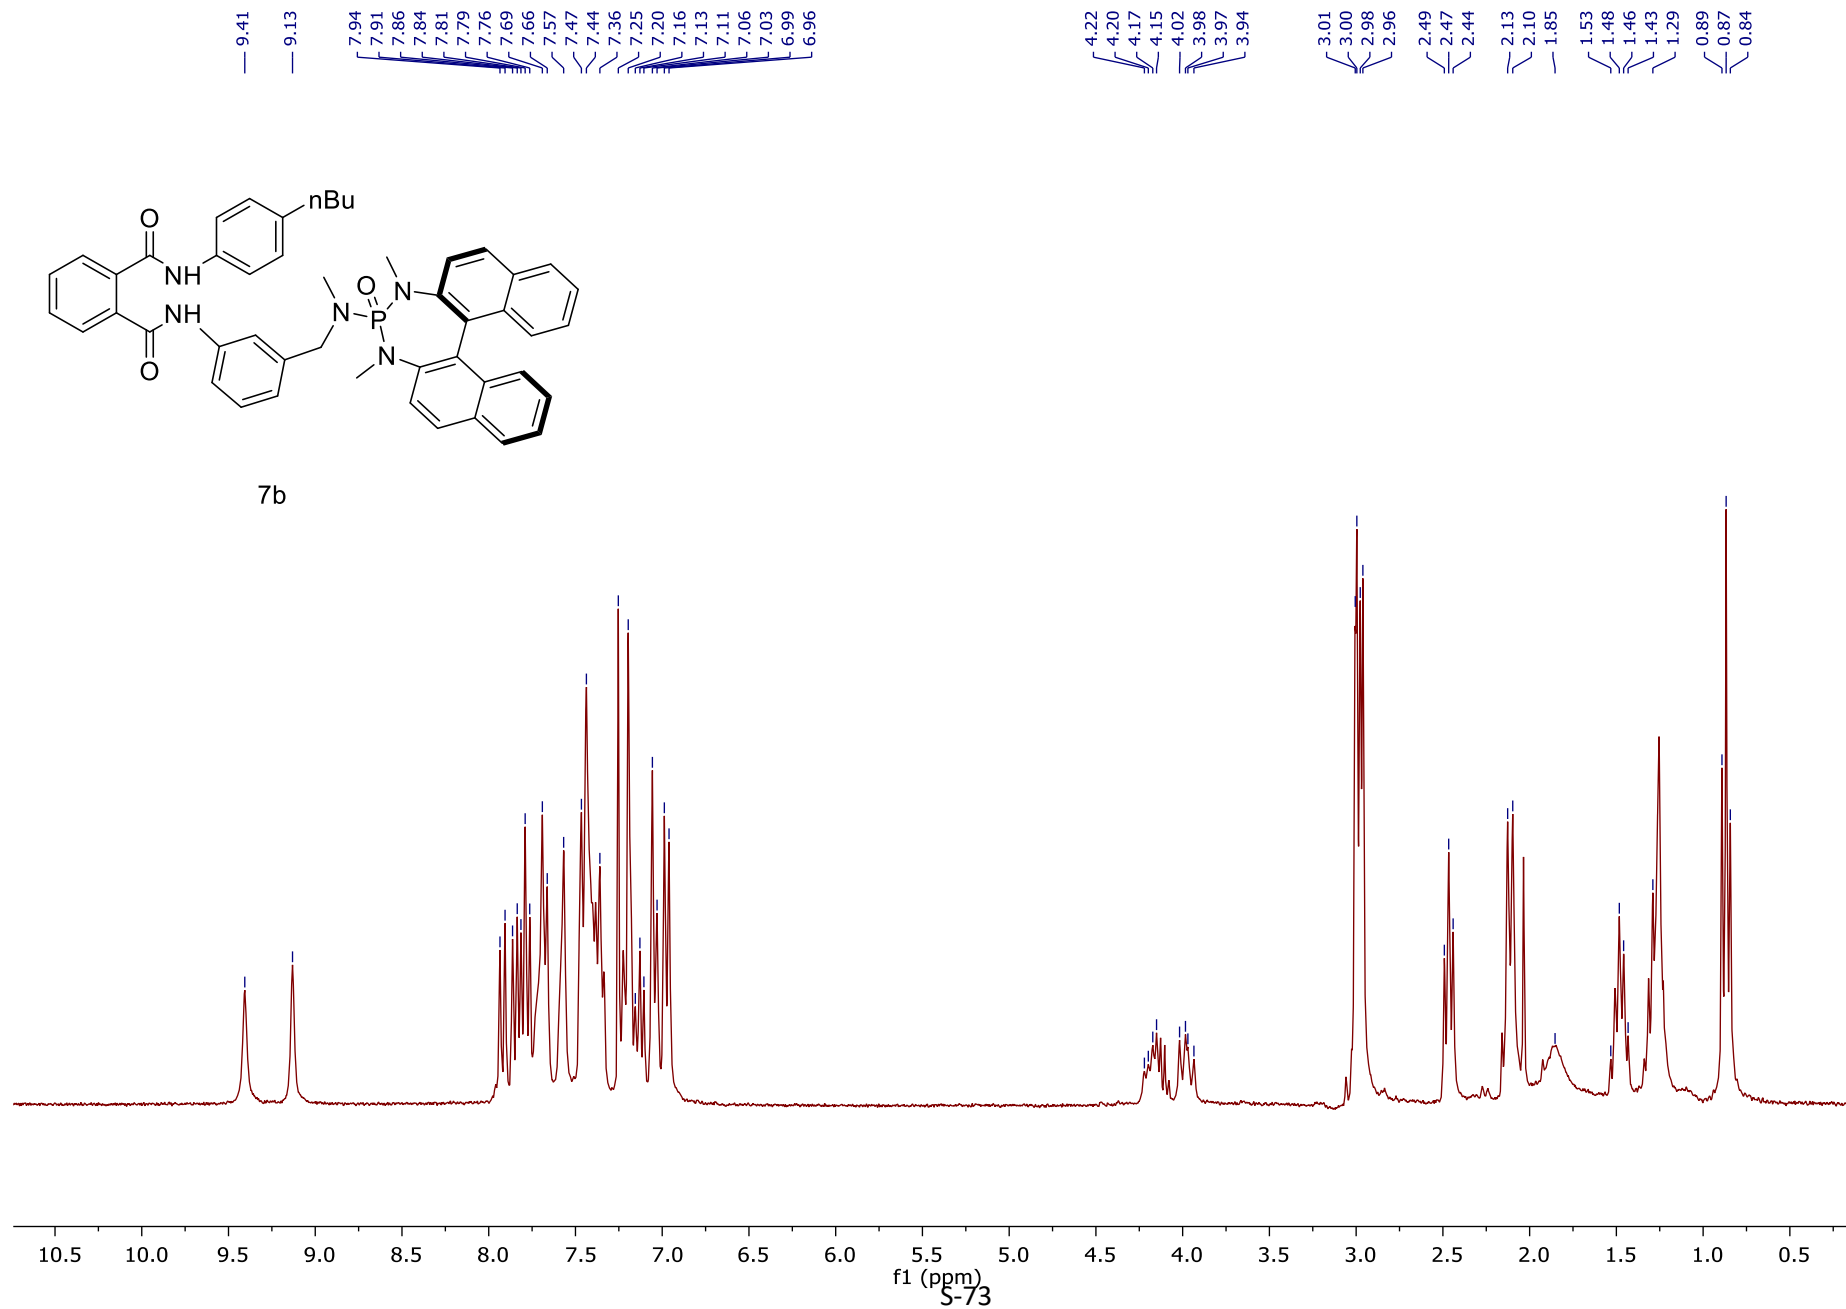

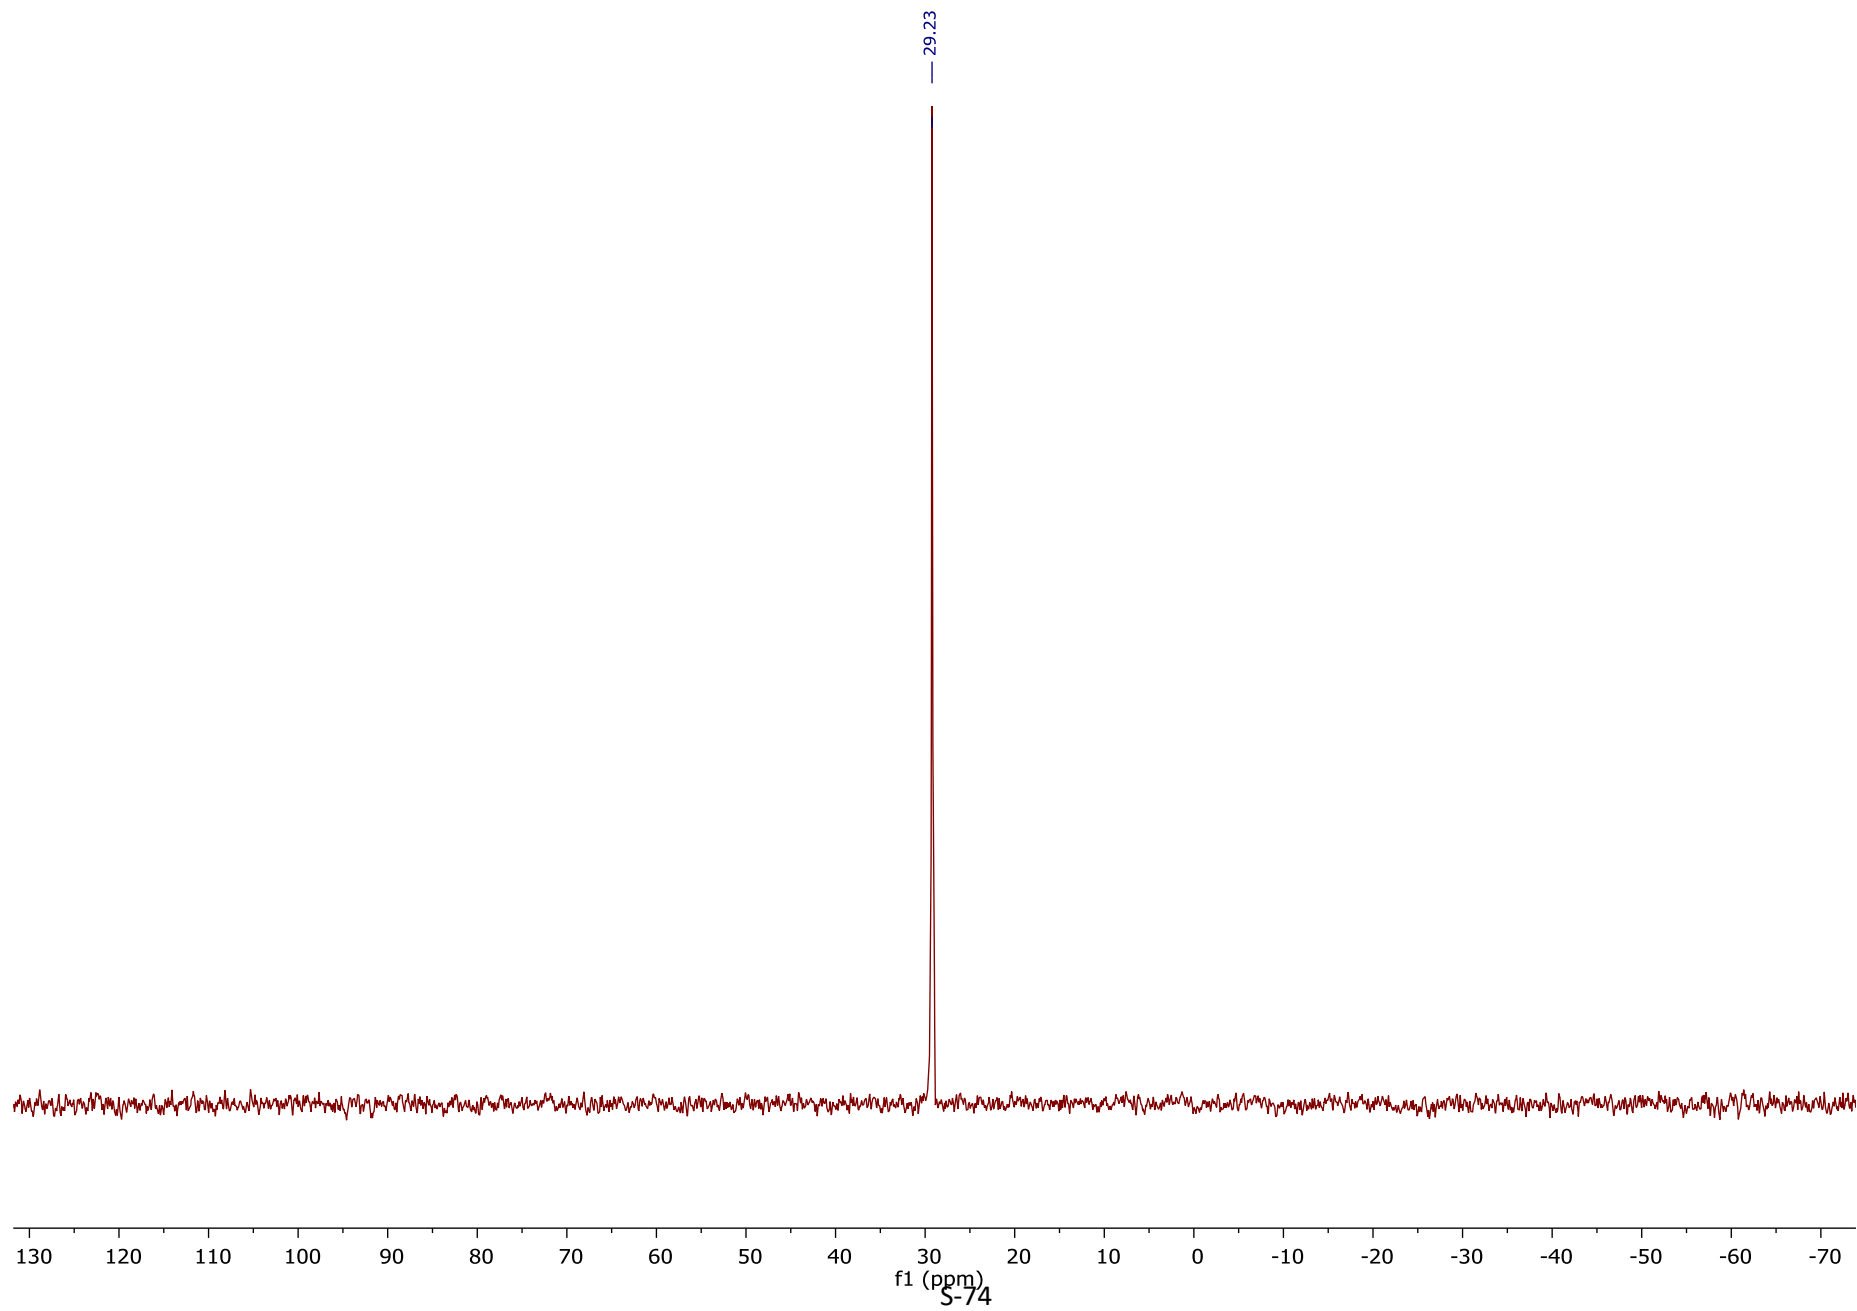

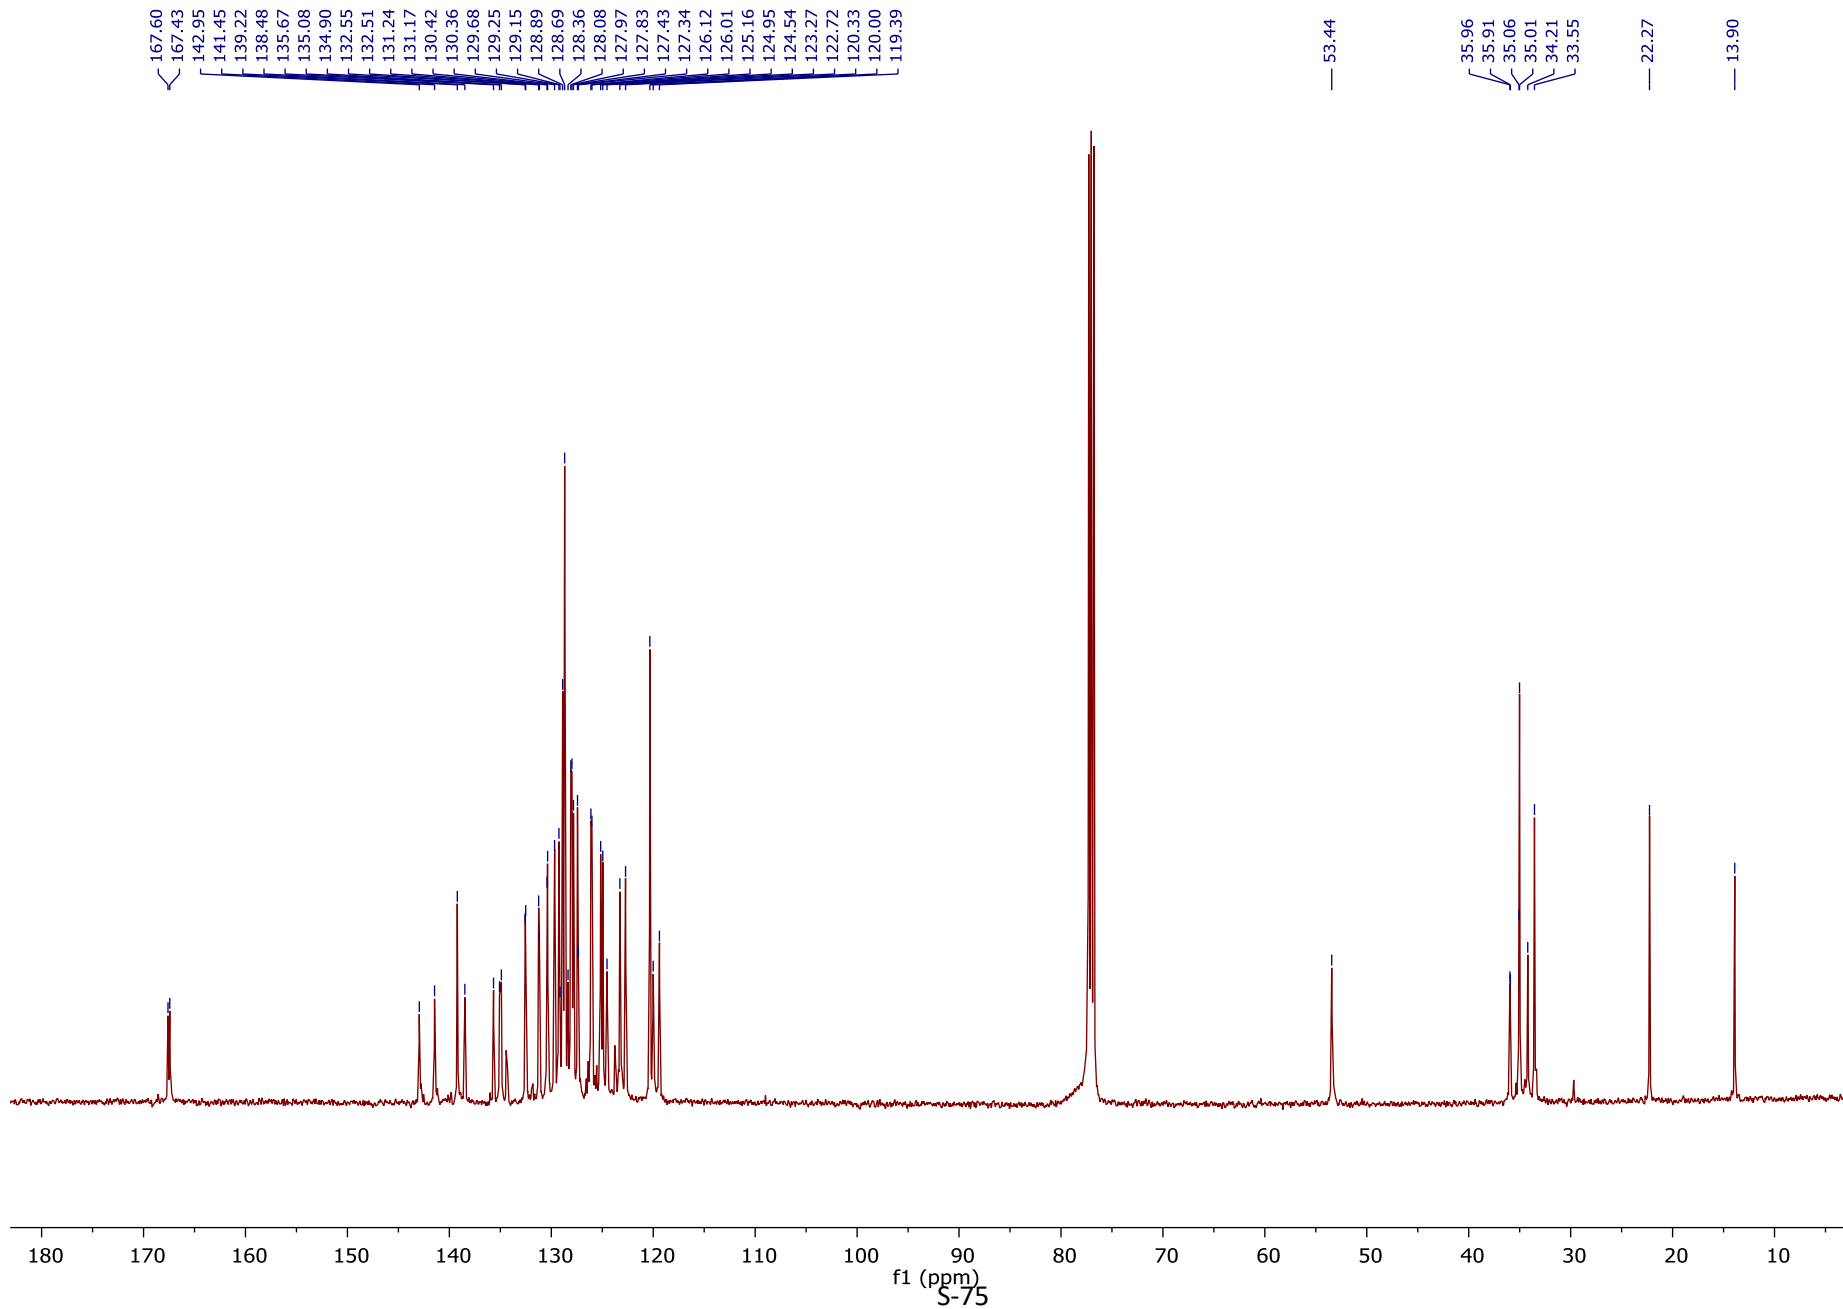

COSY

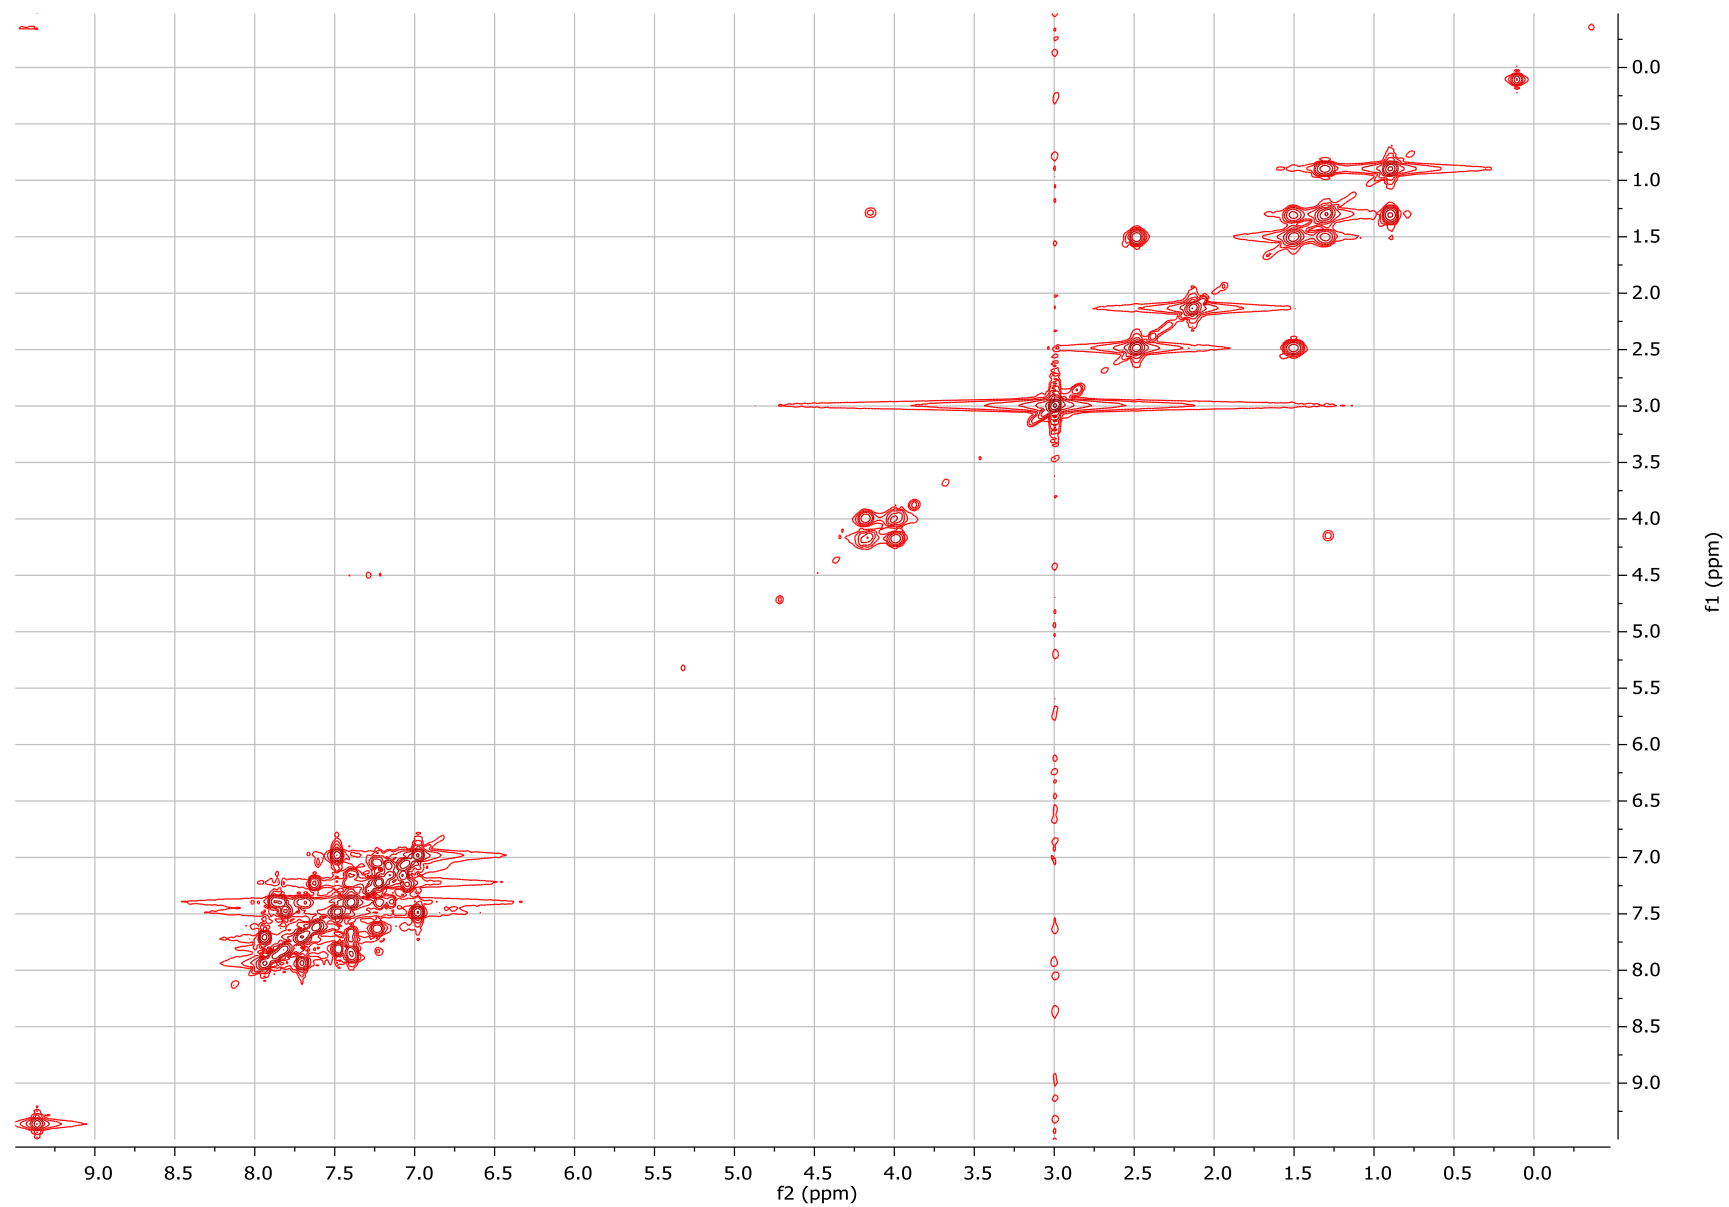

S-76

HMQC

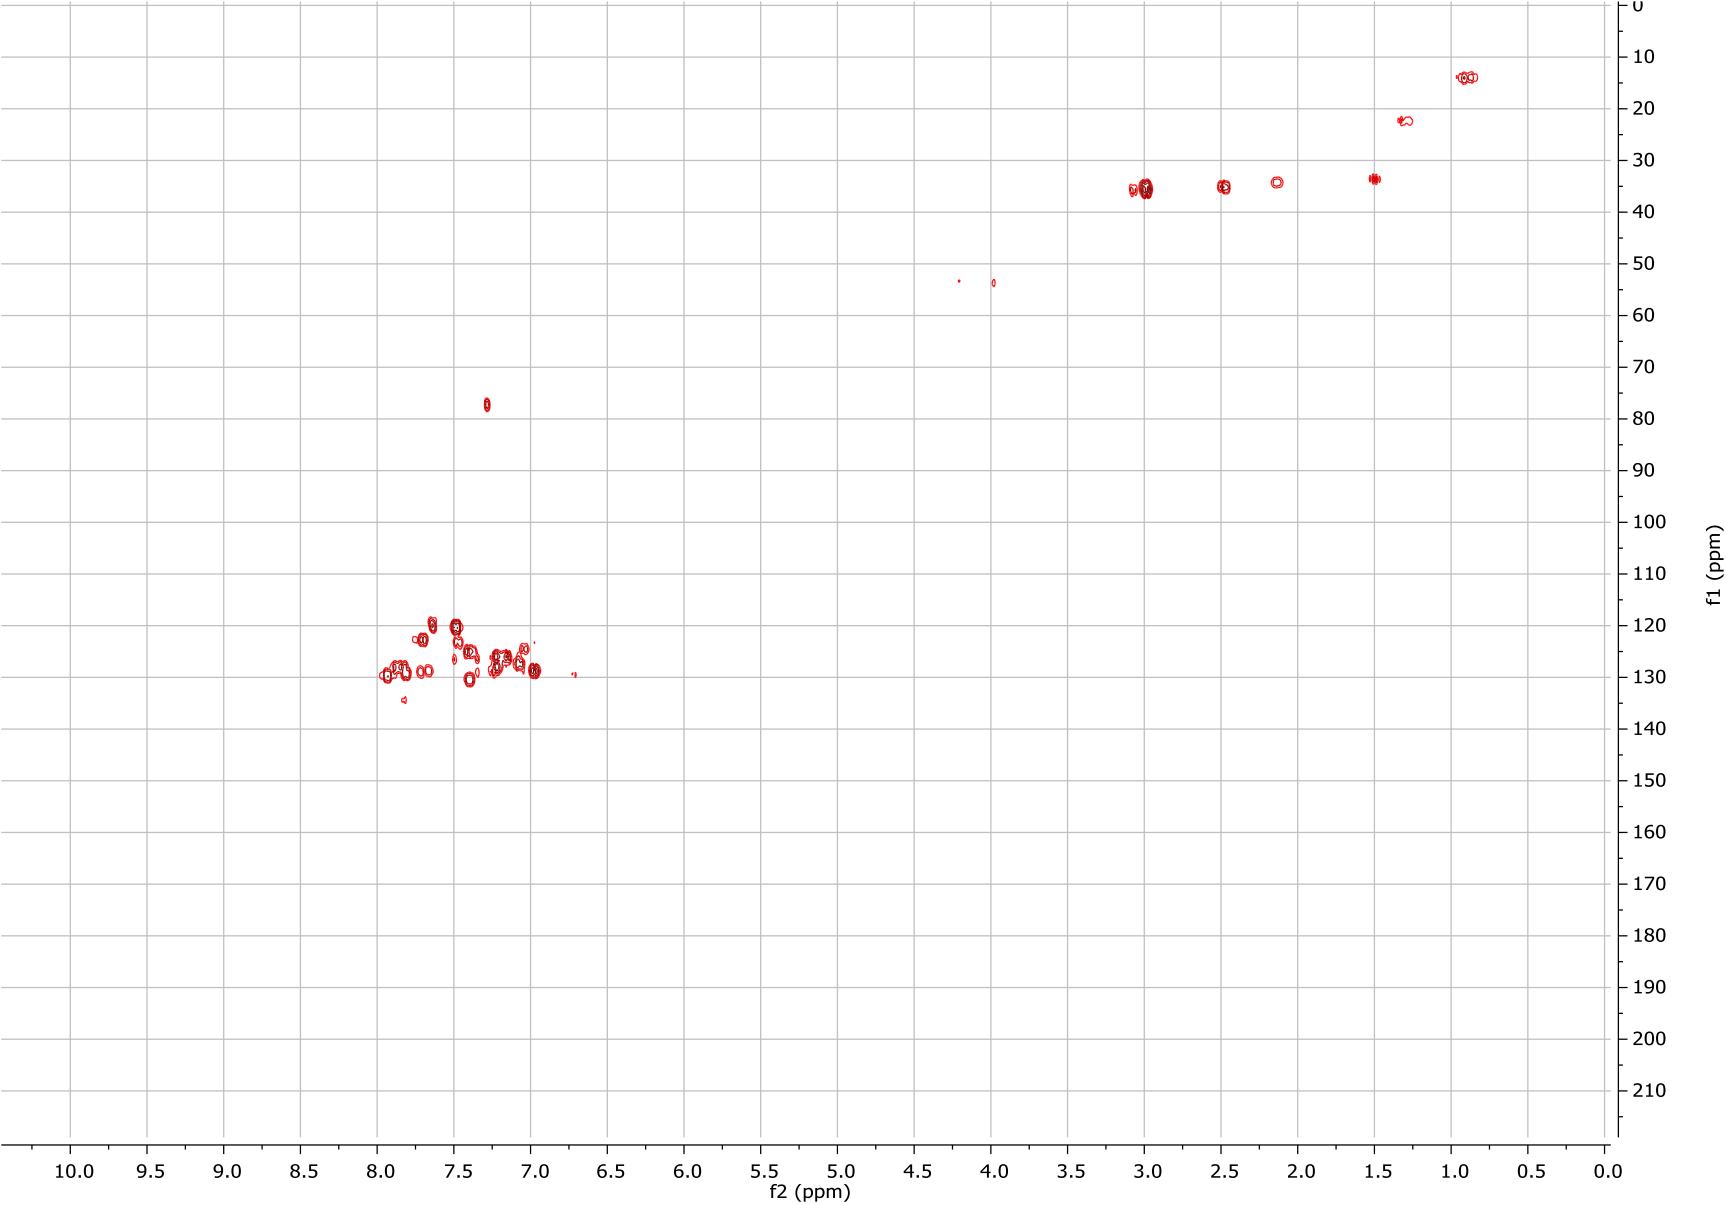

S-77

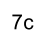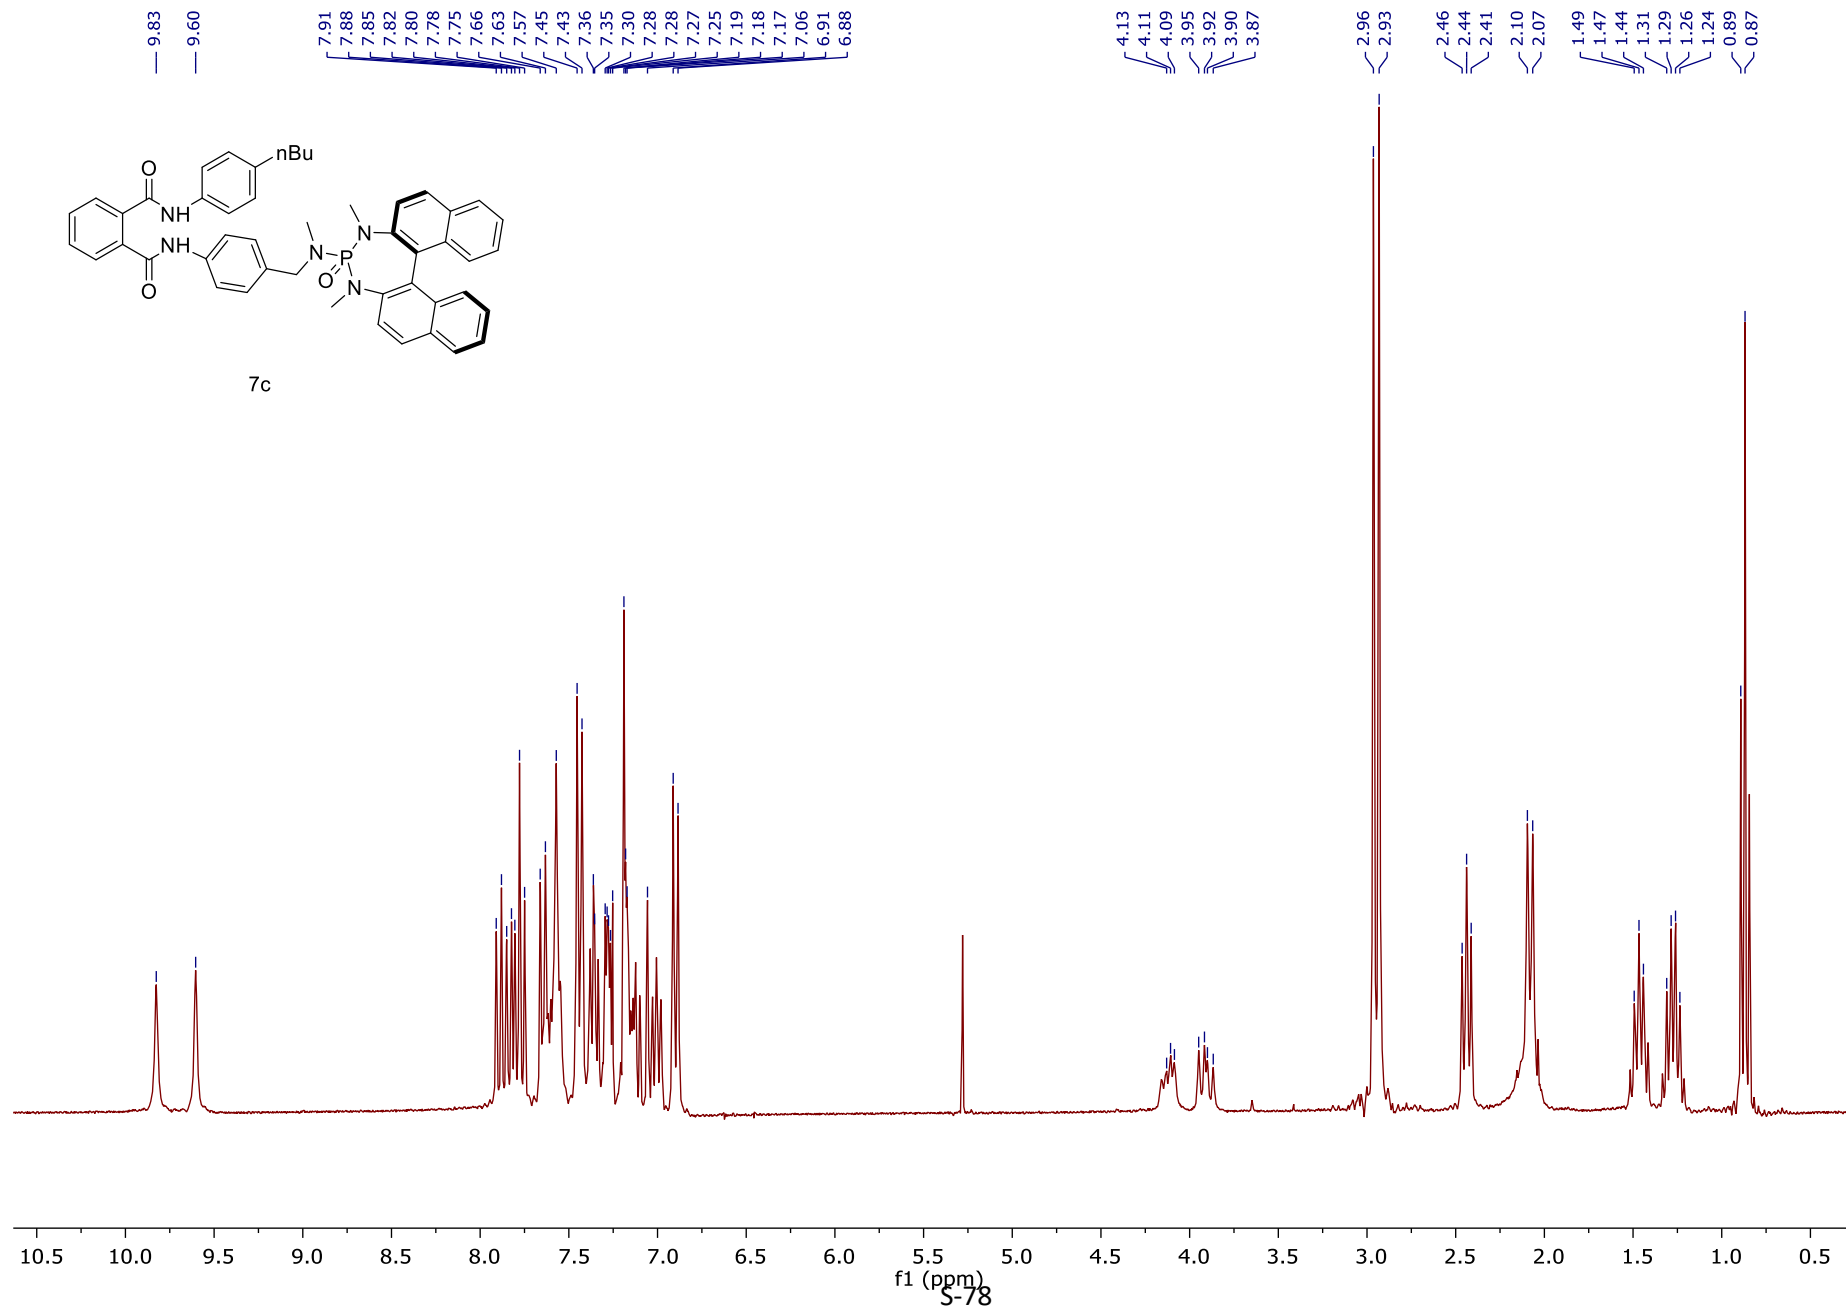

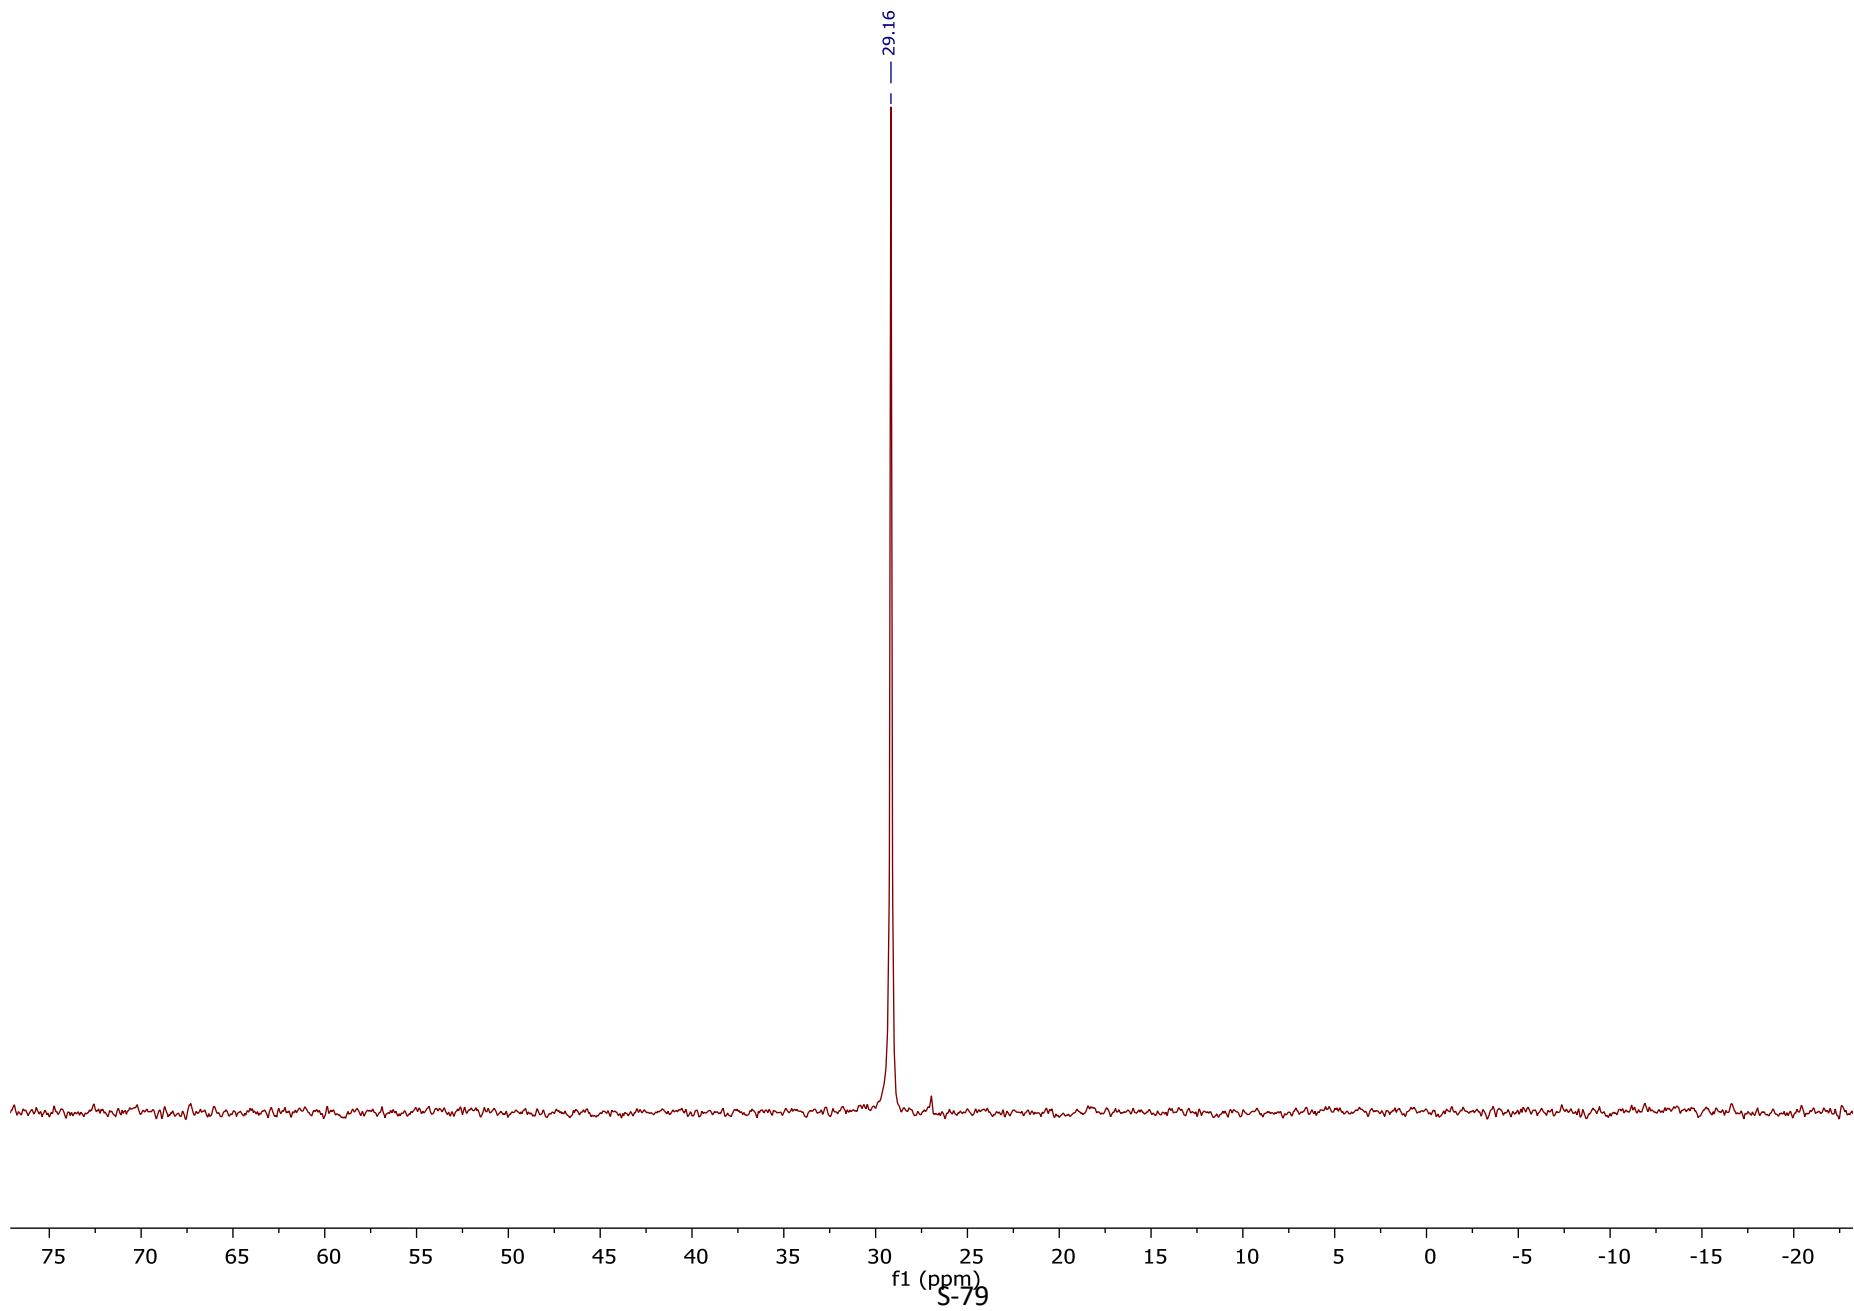

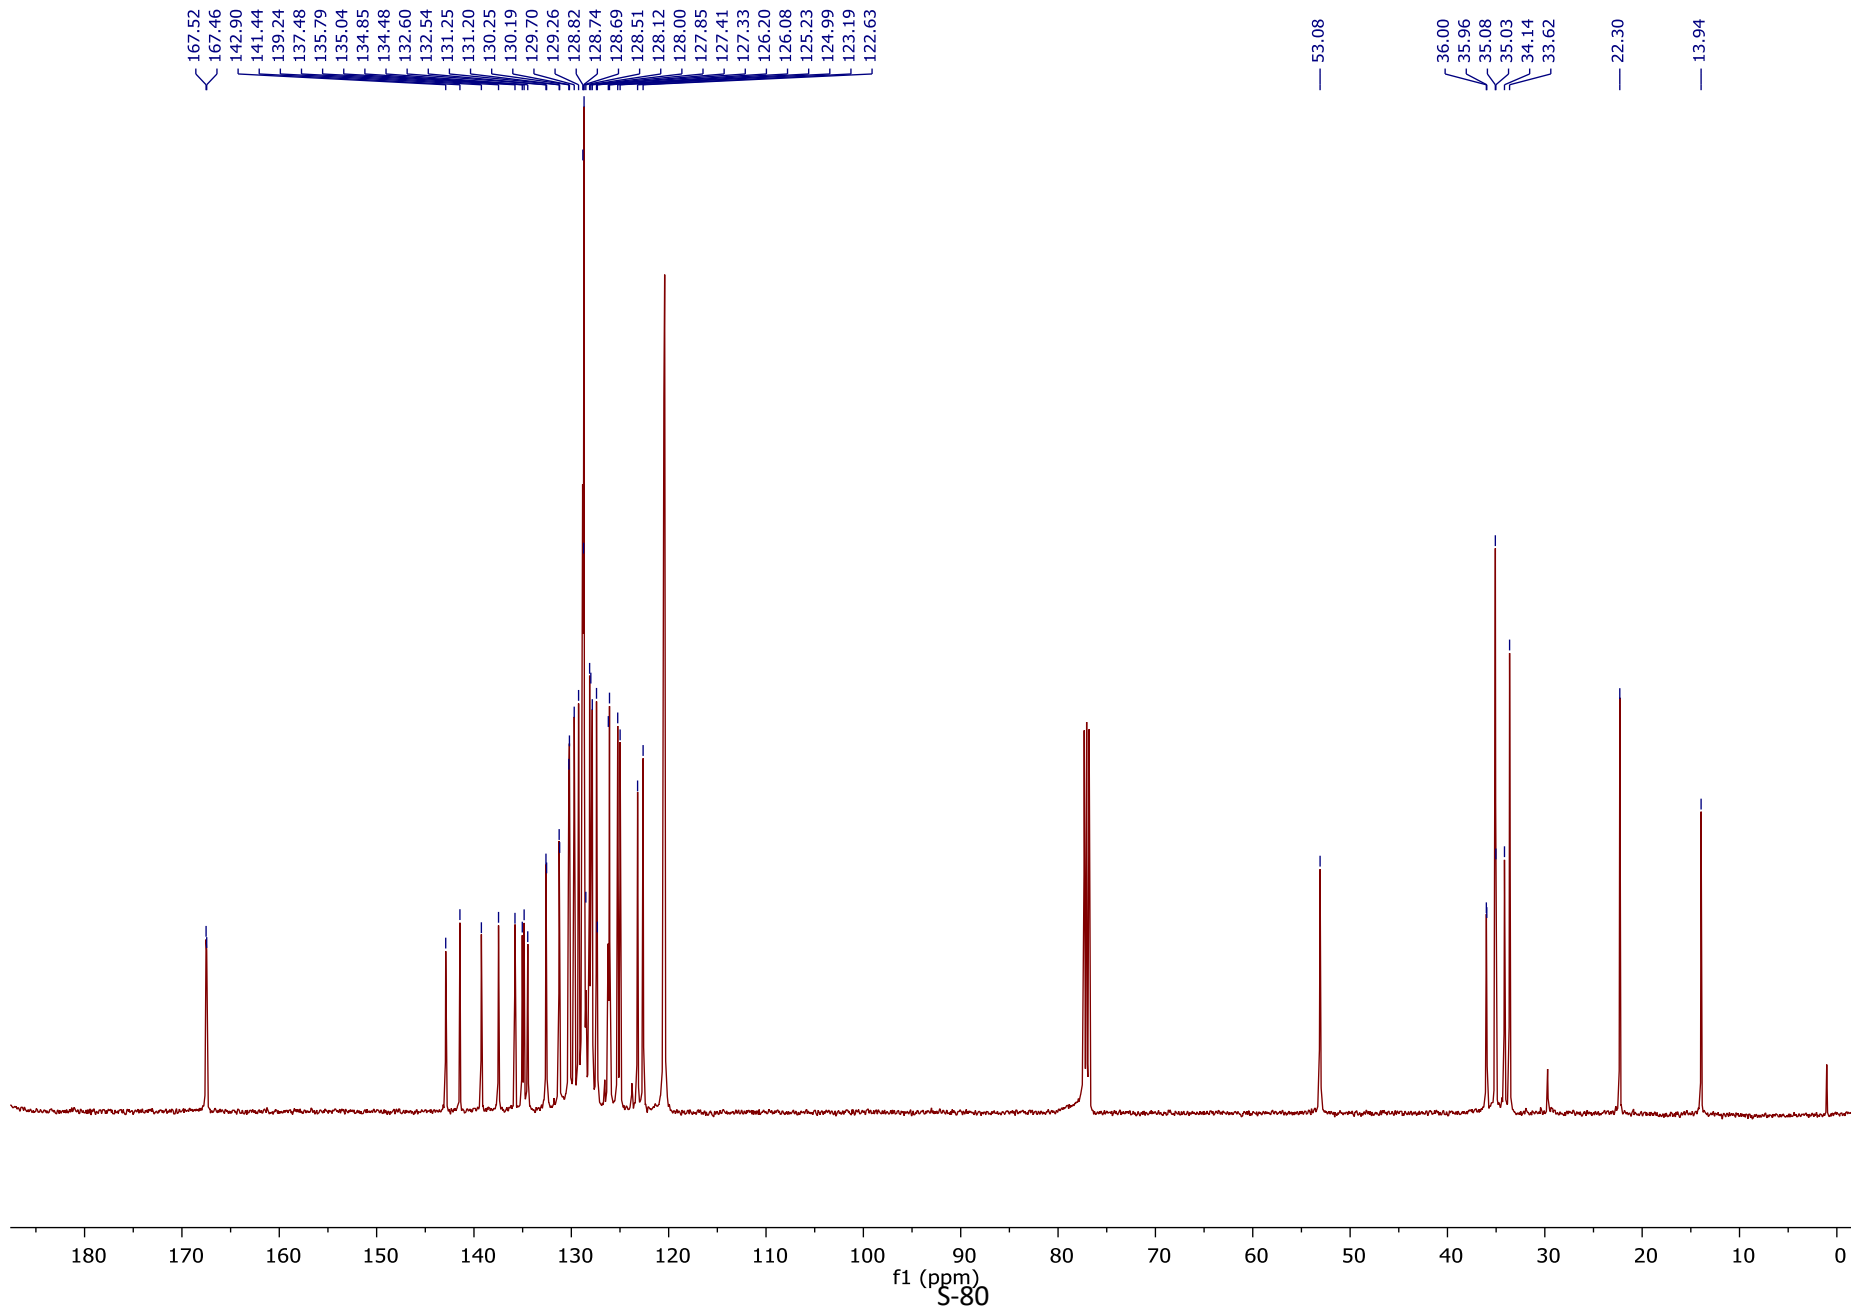

COSY

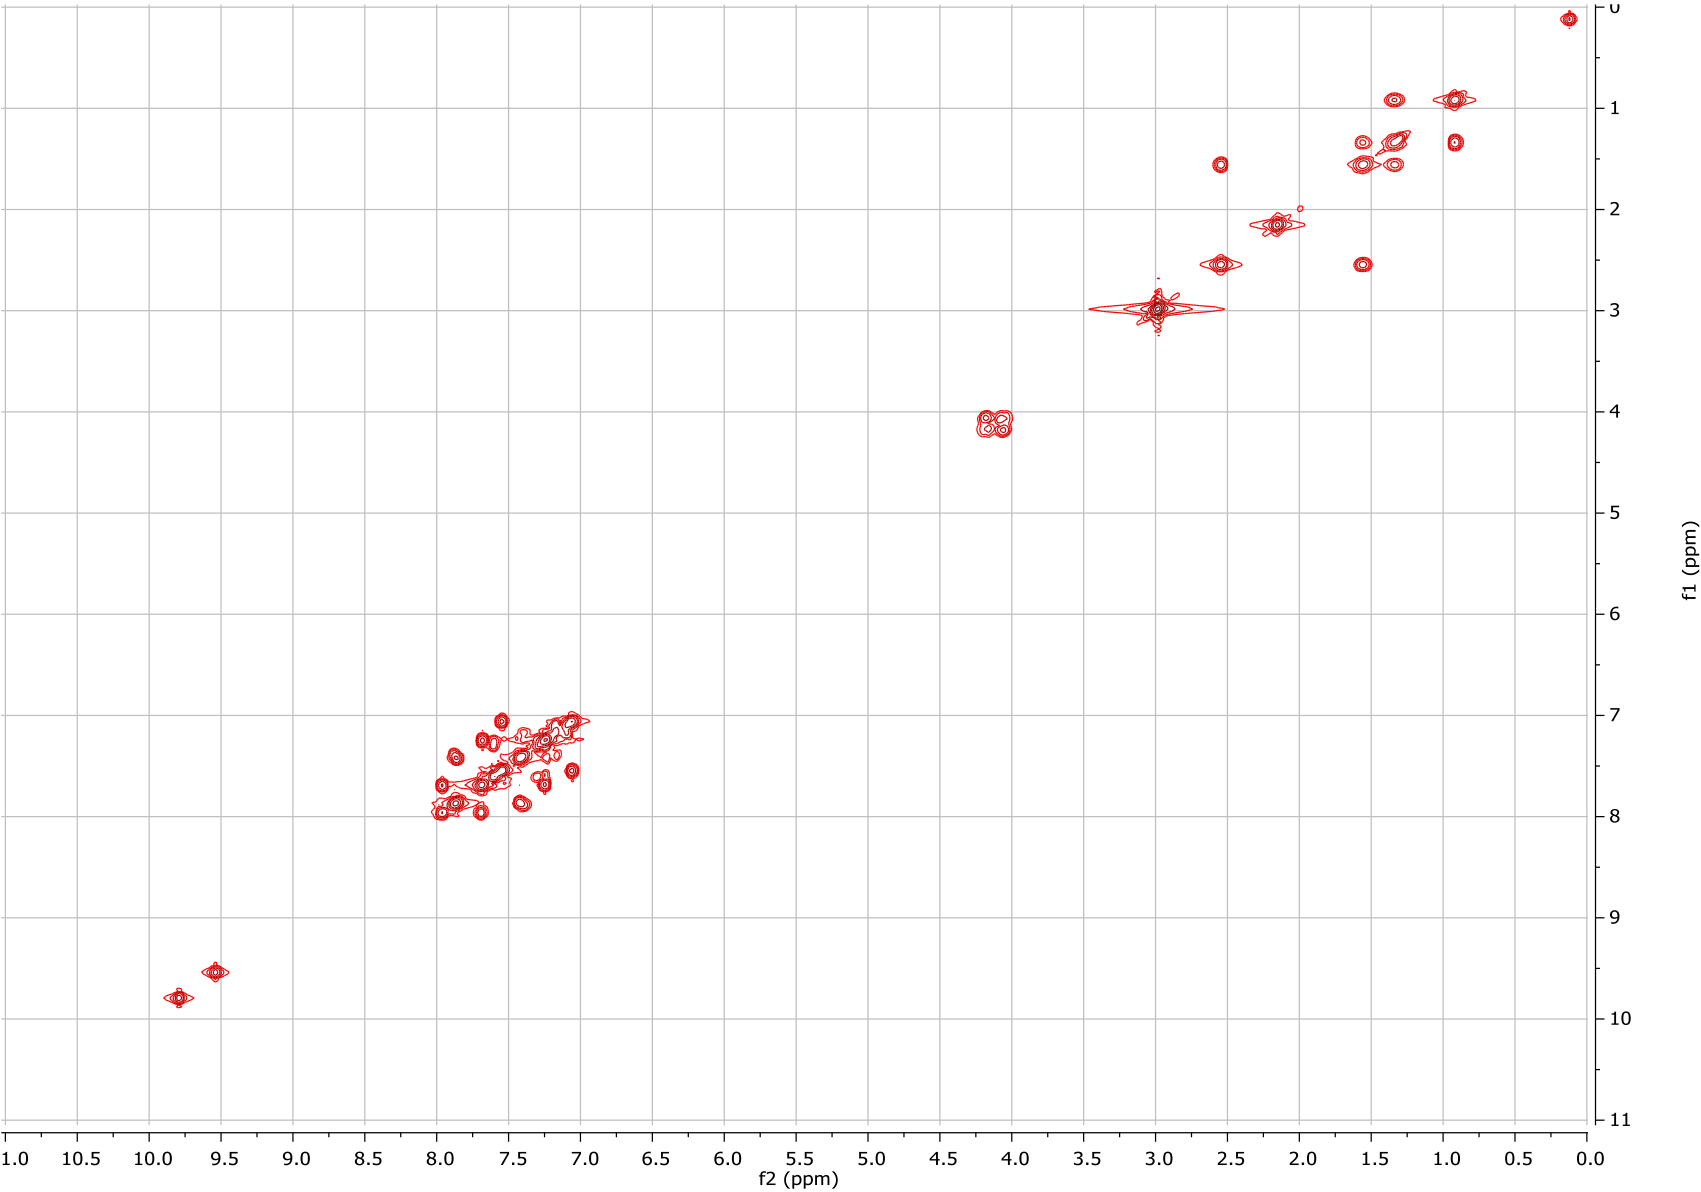

HSQC

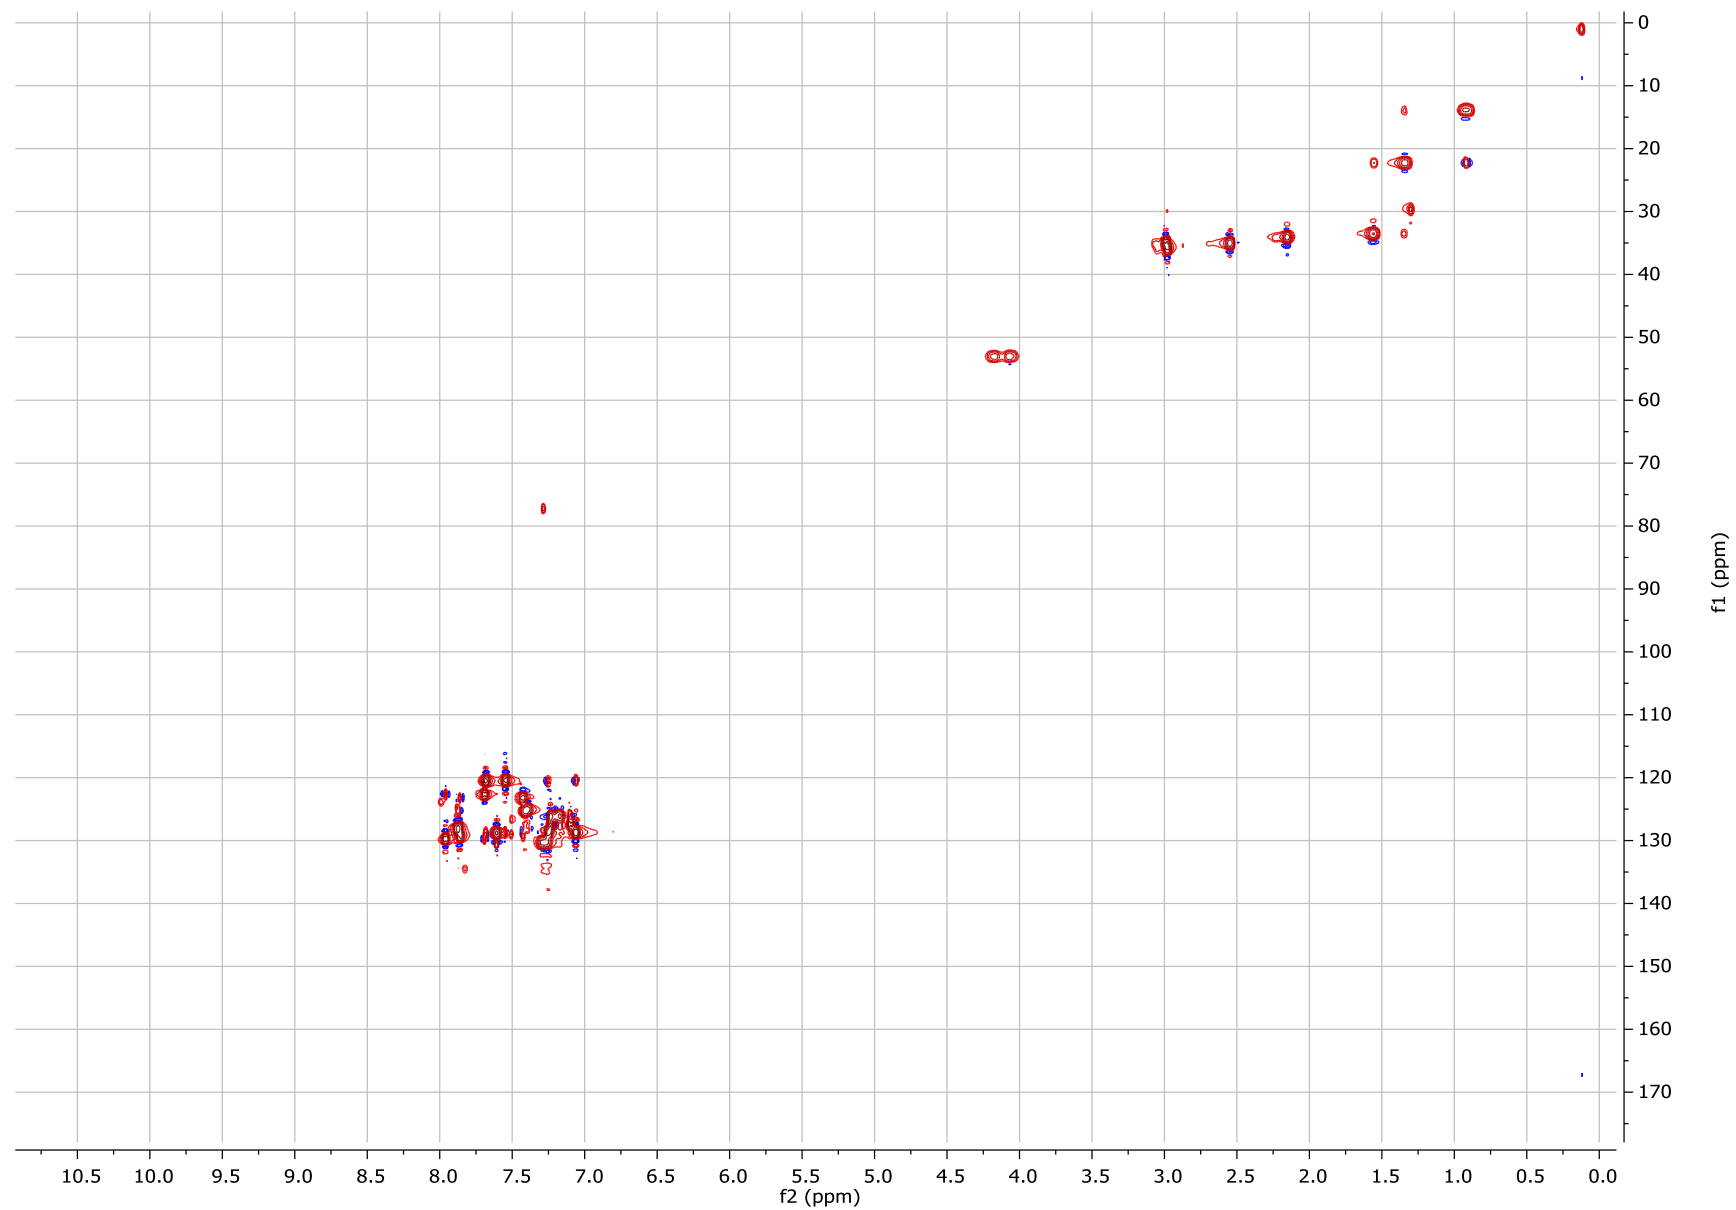

S-82

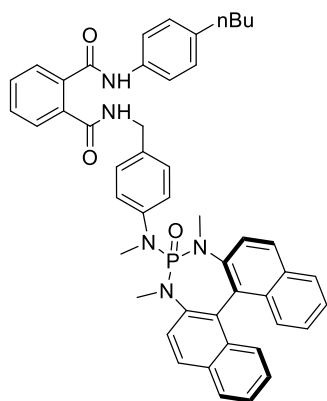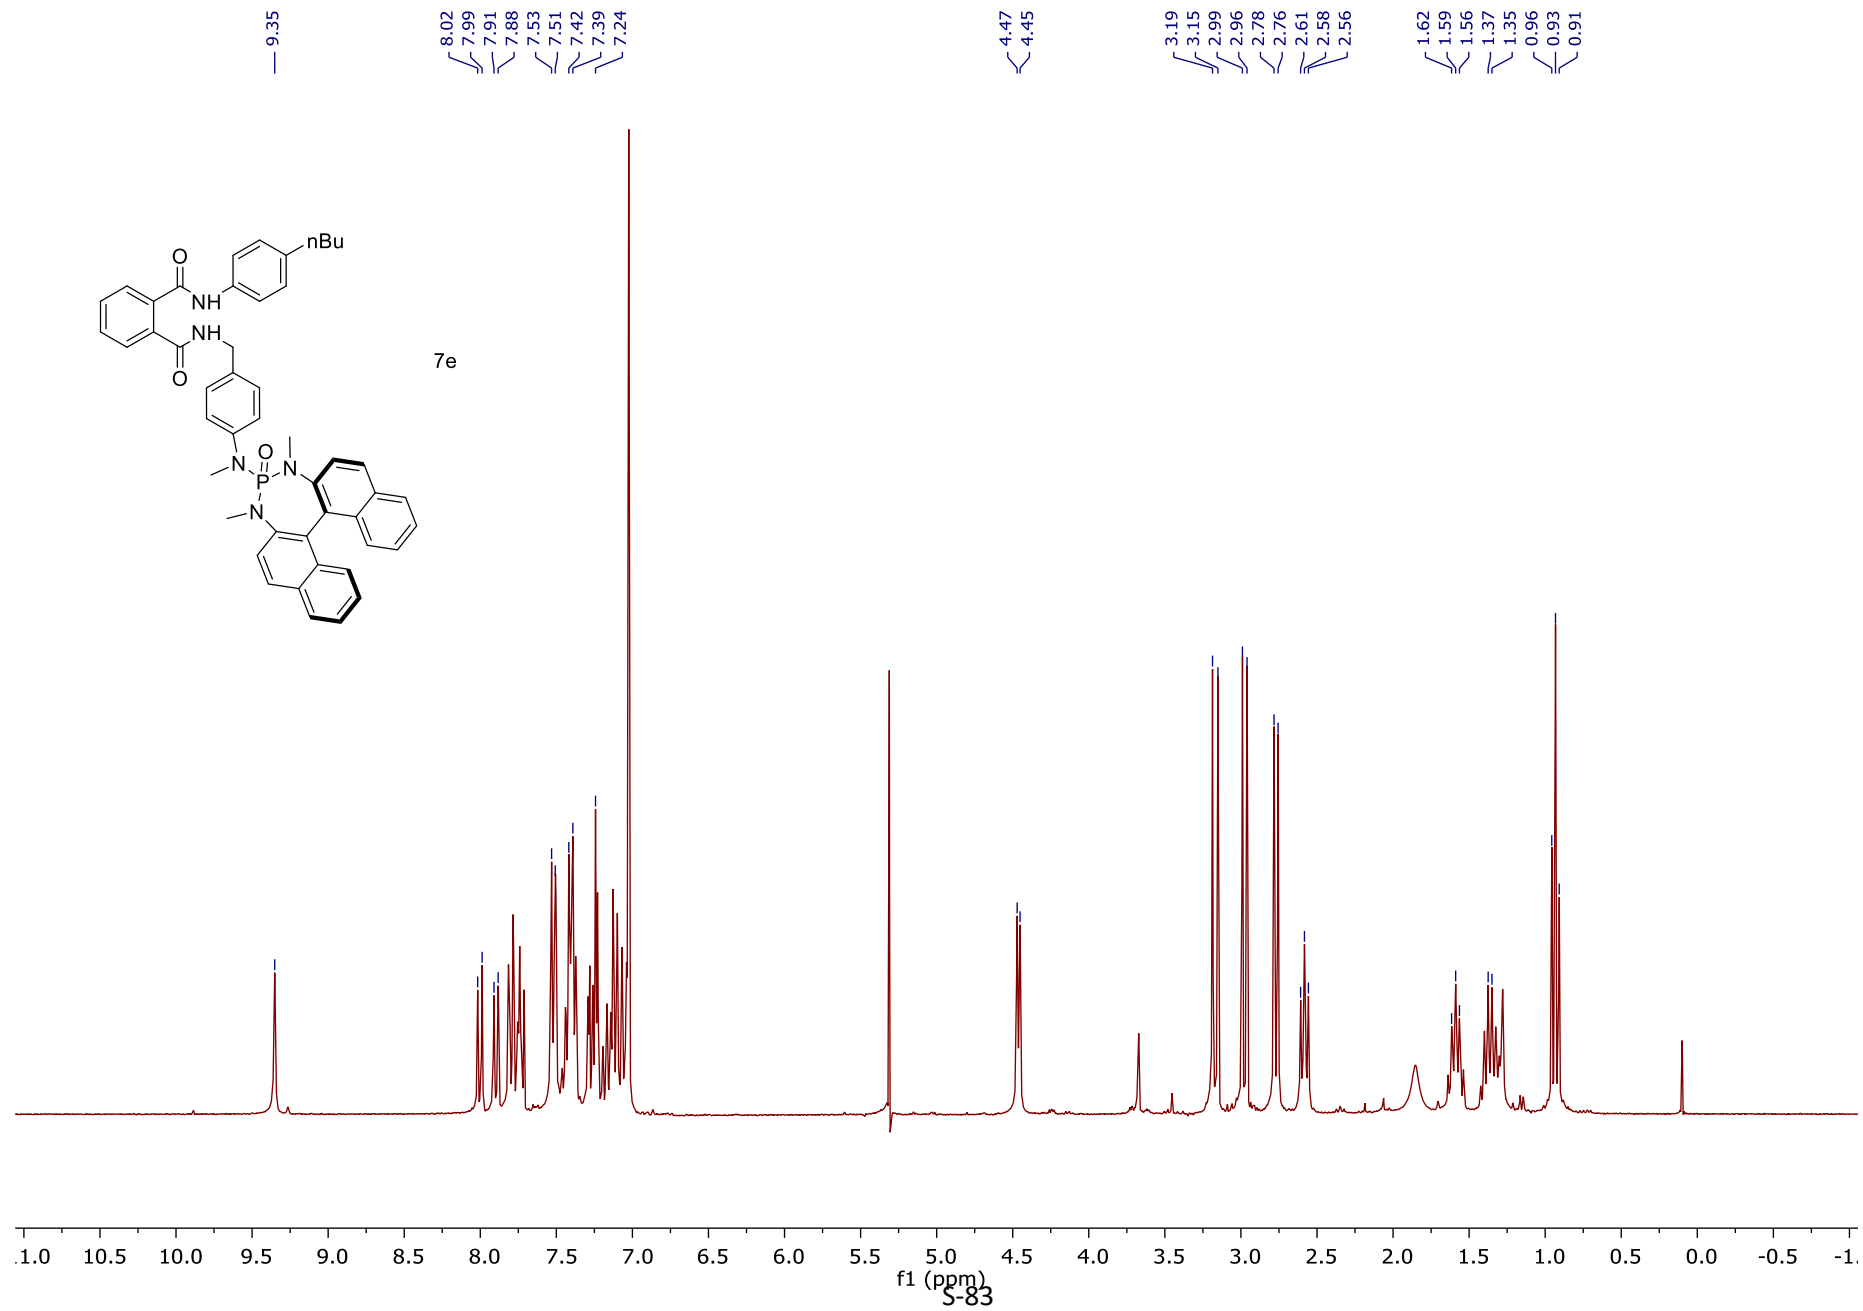

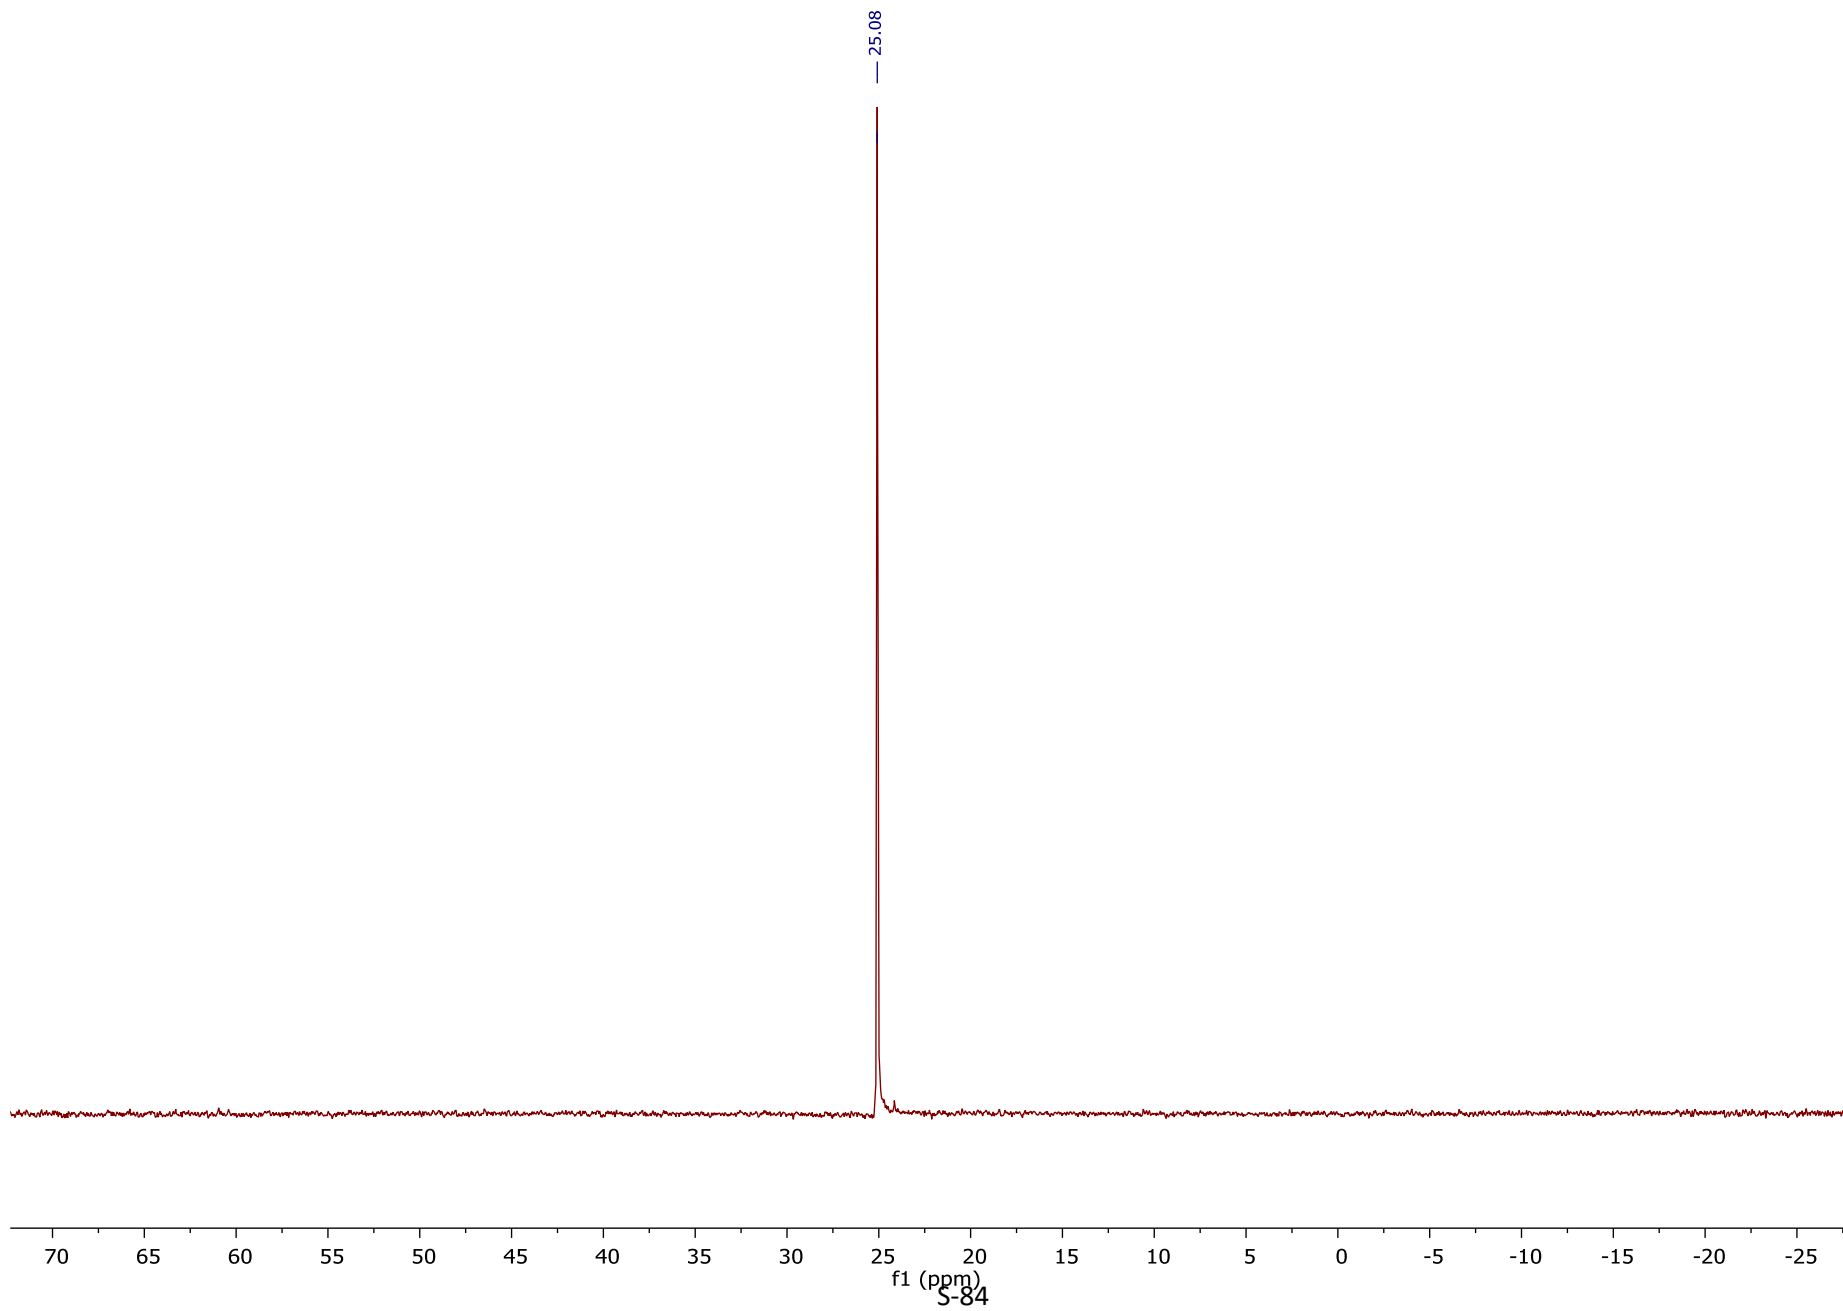

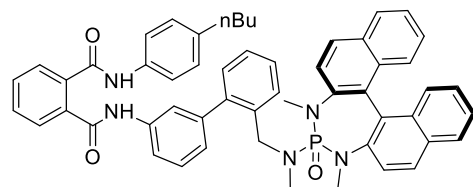

7f

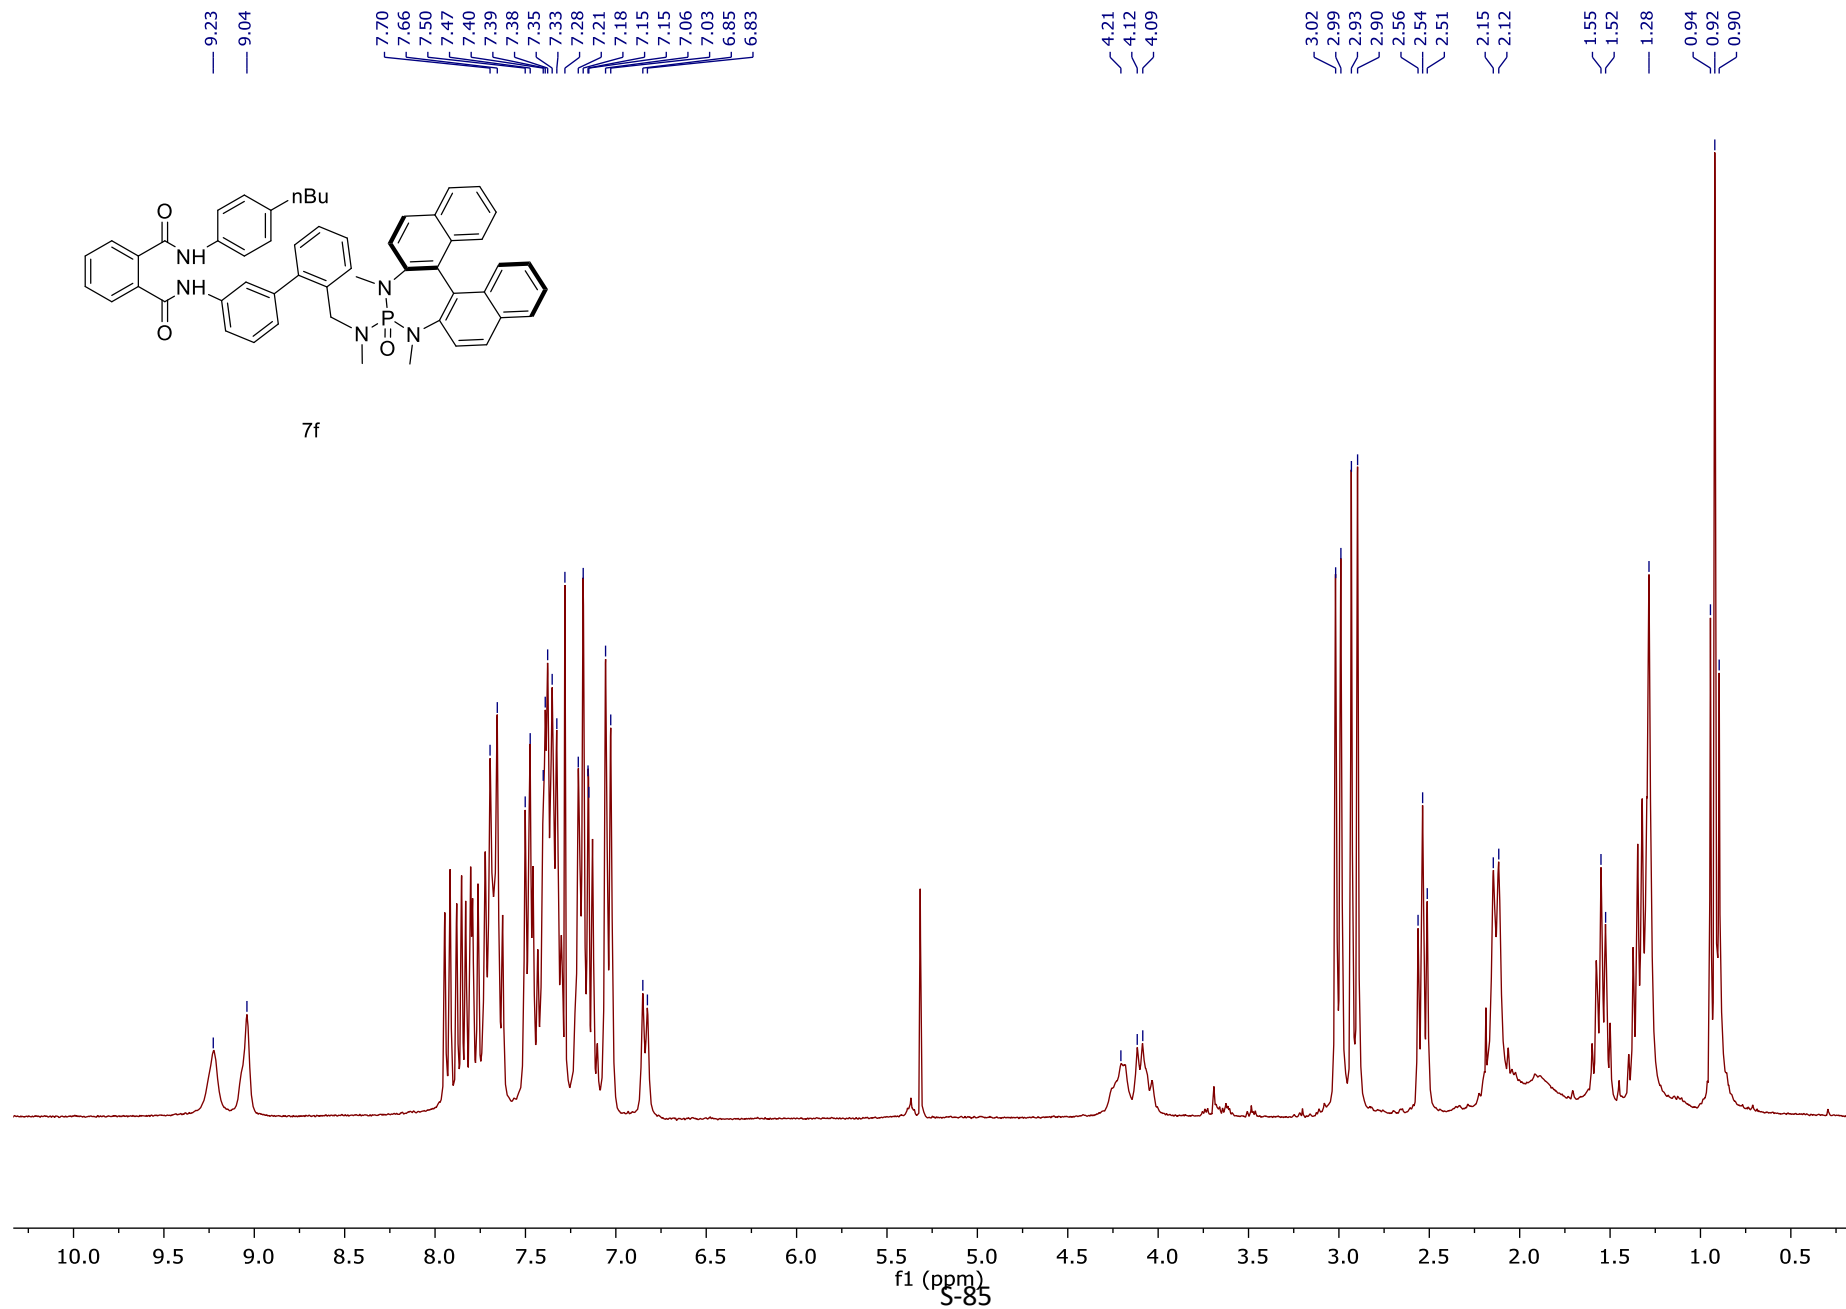

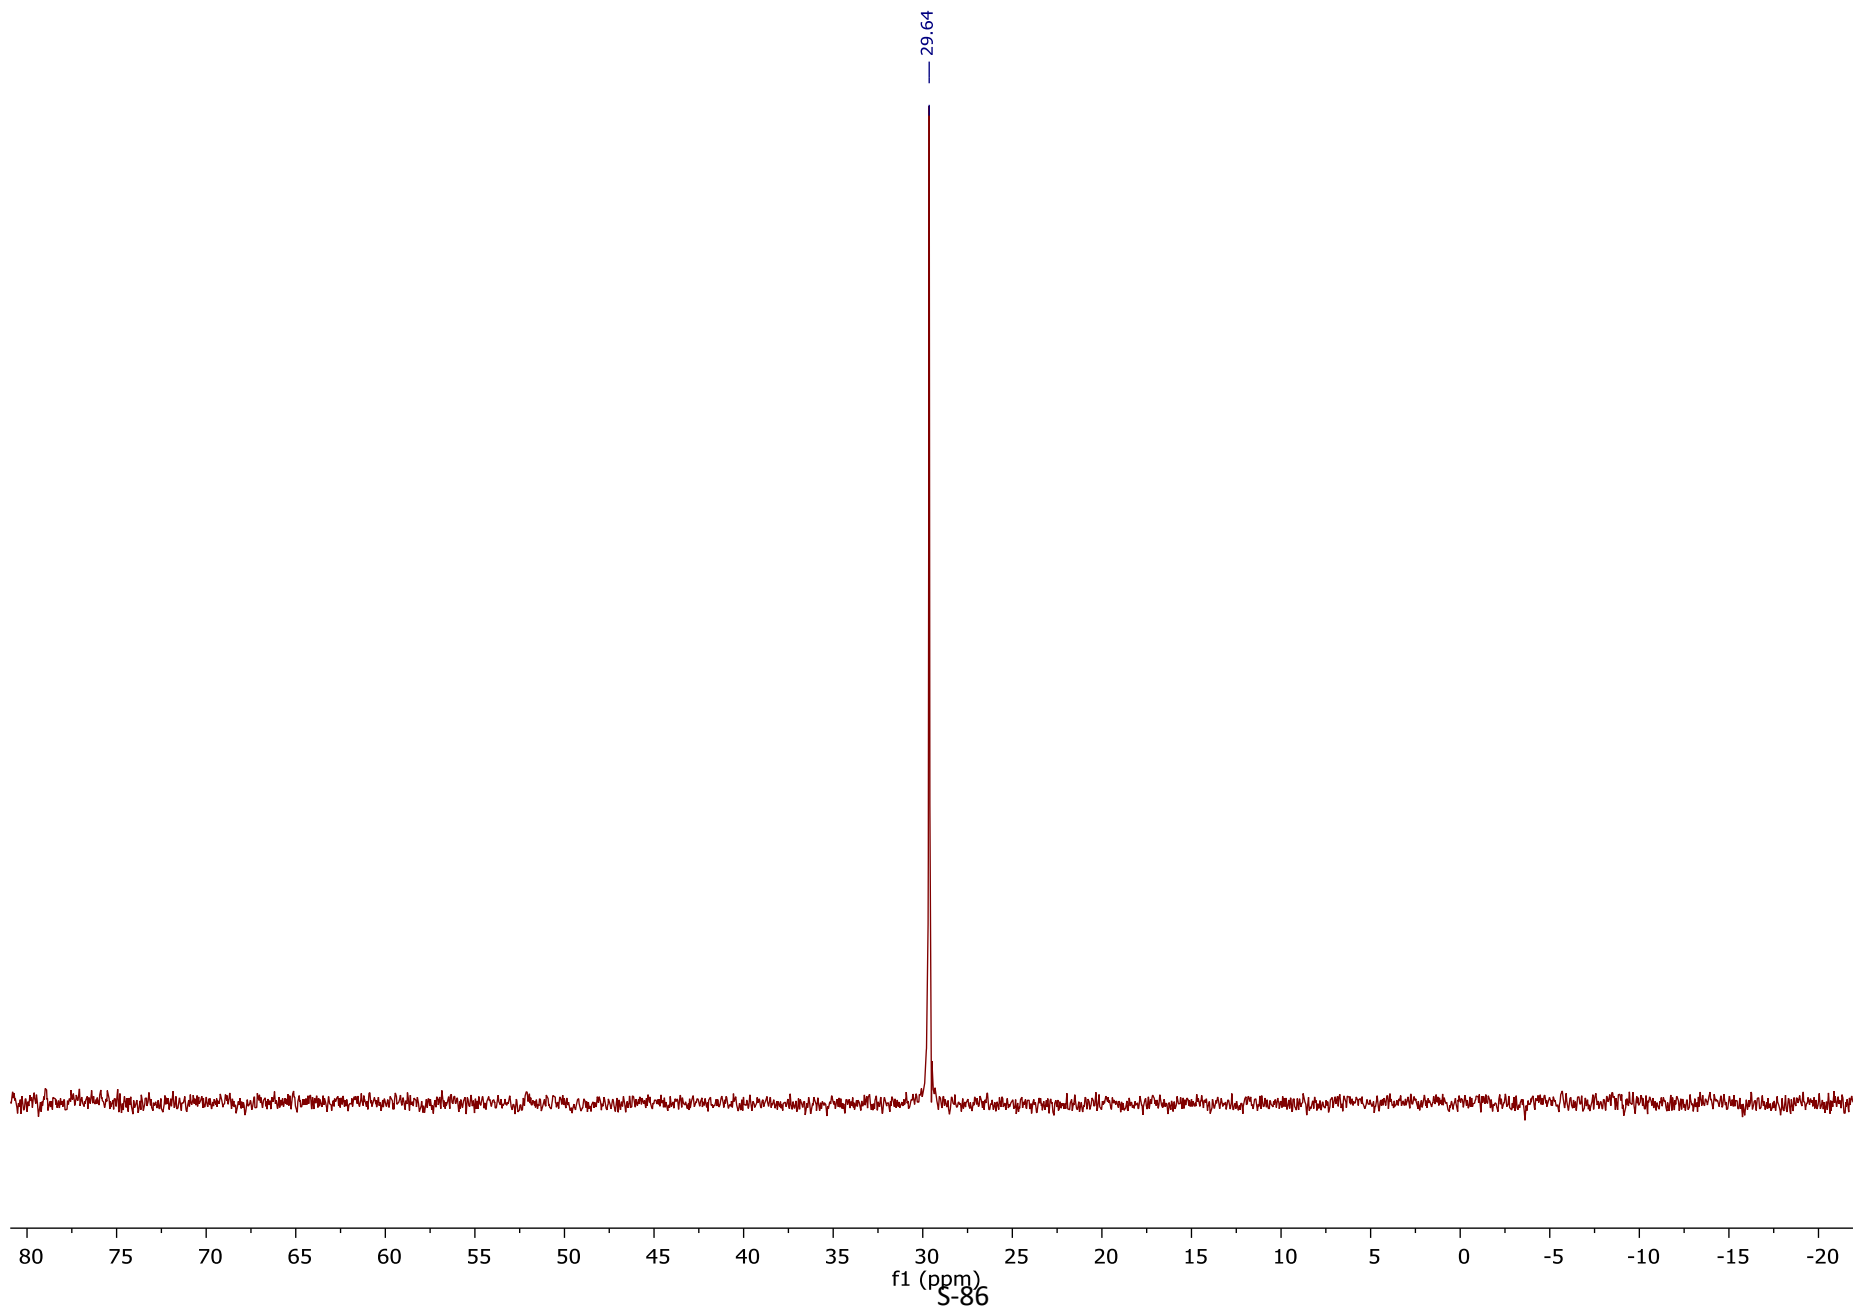

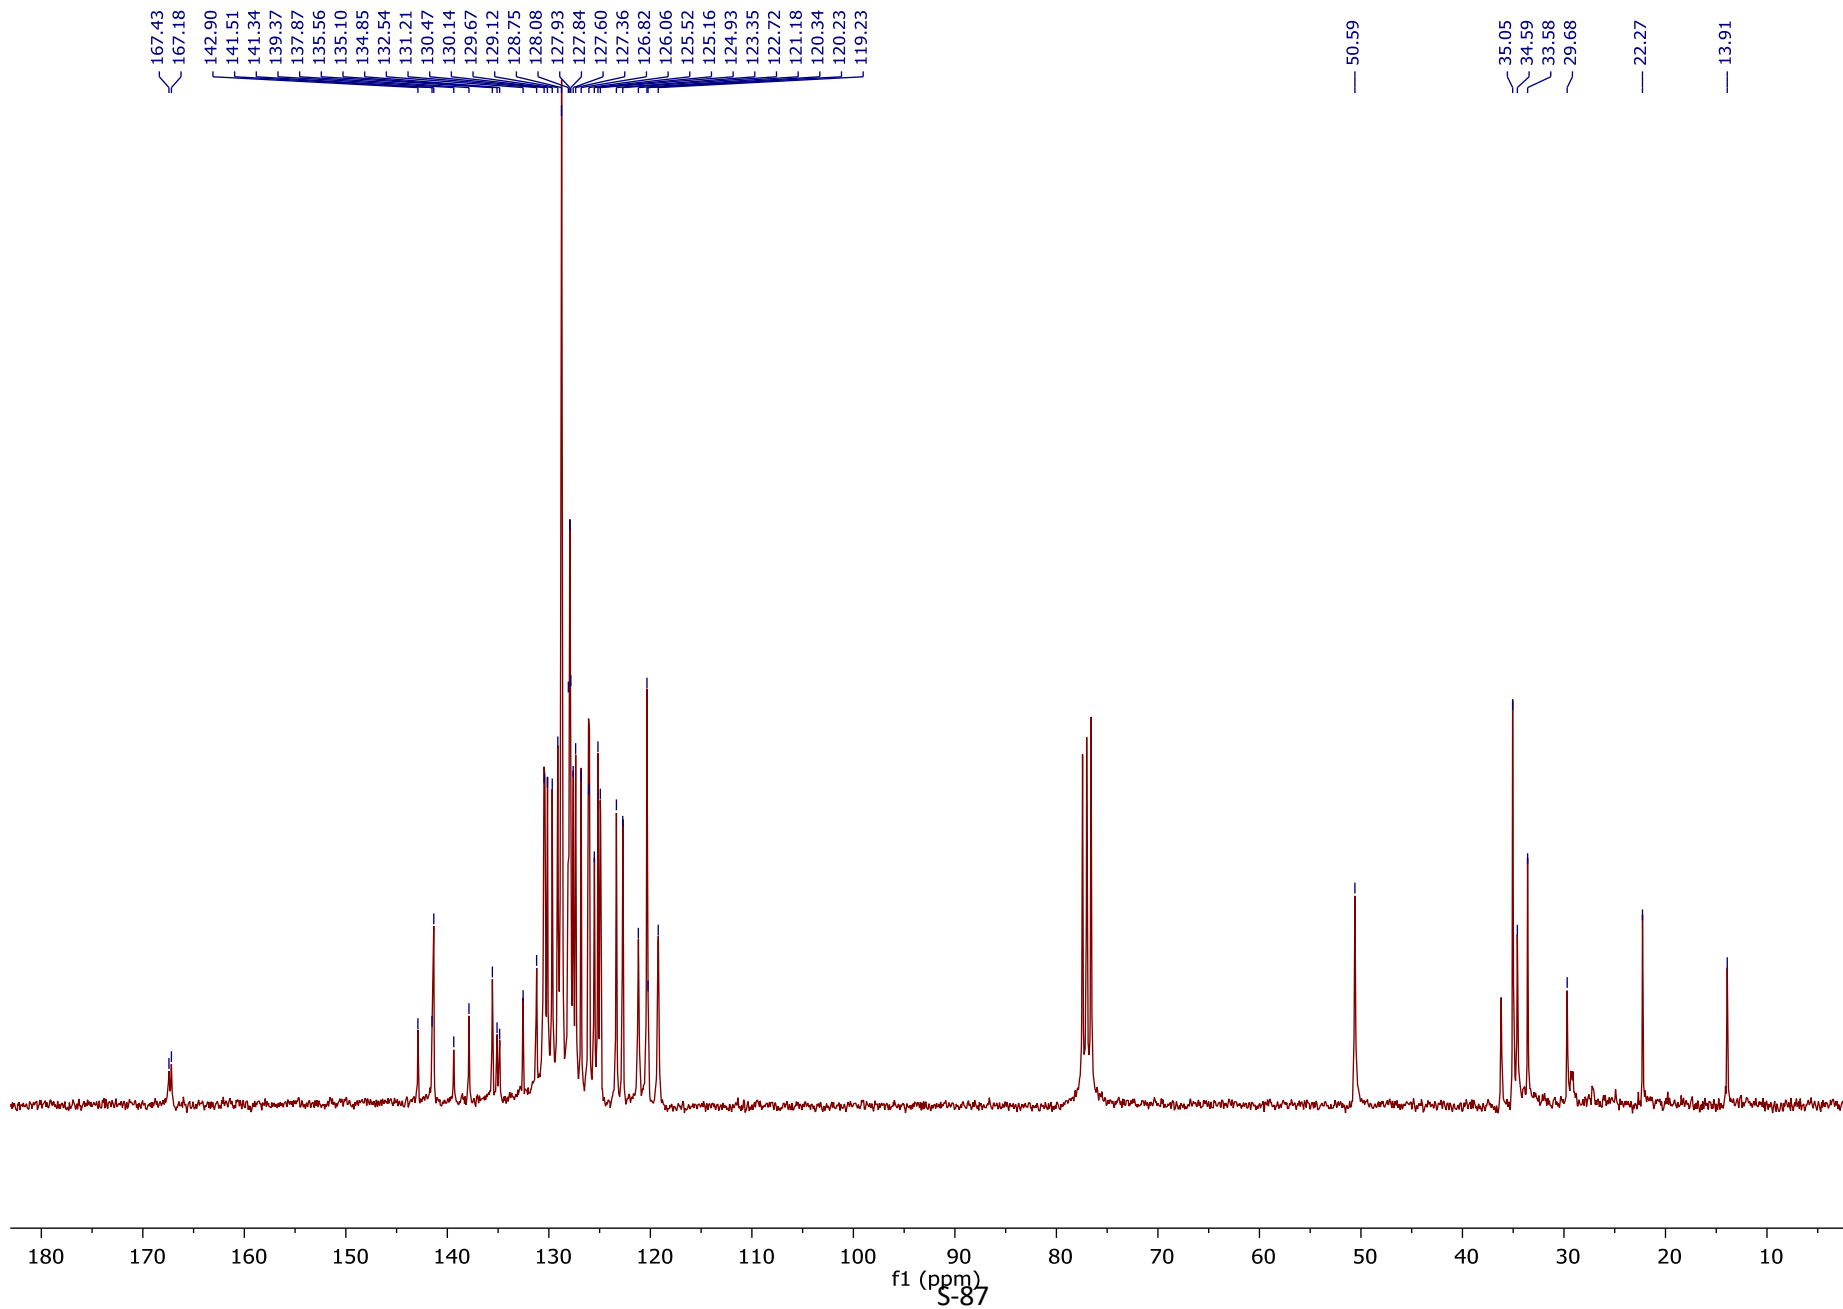

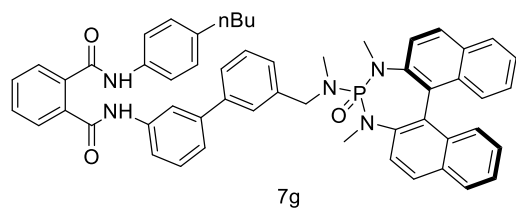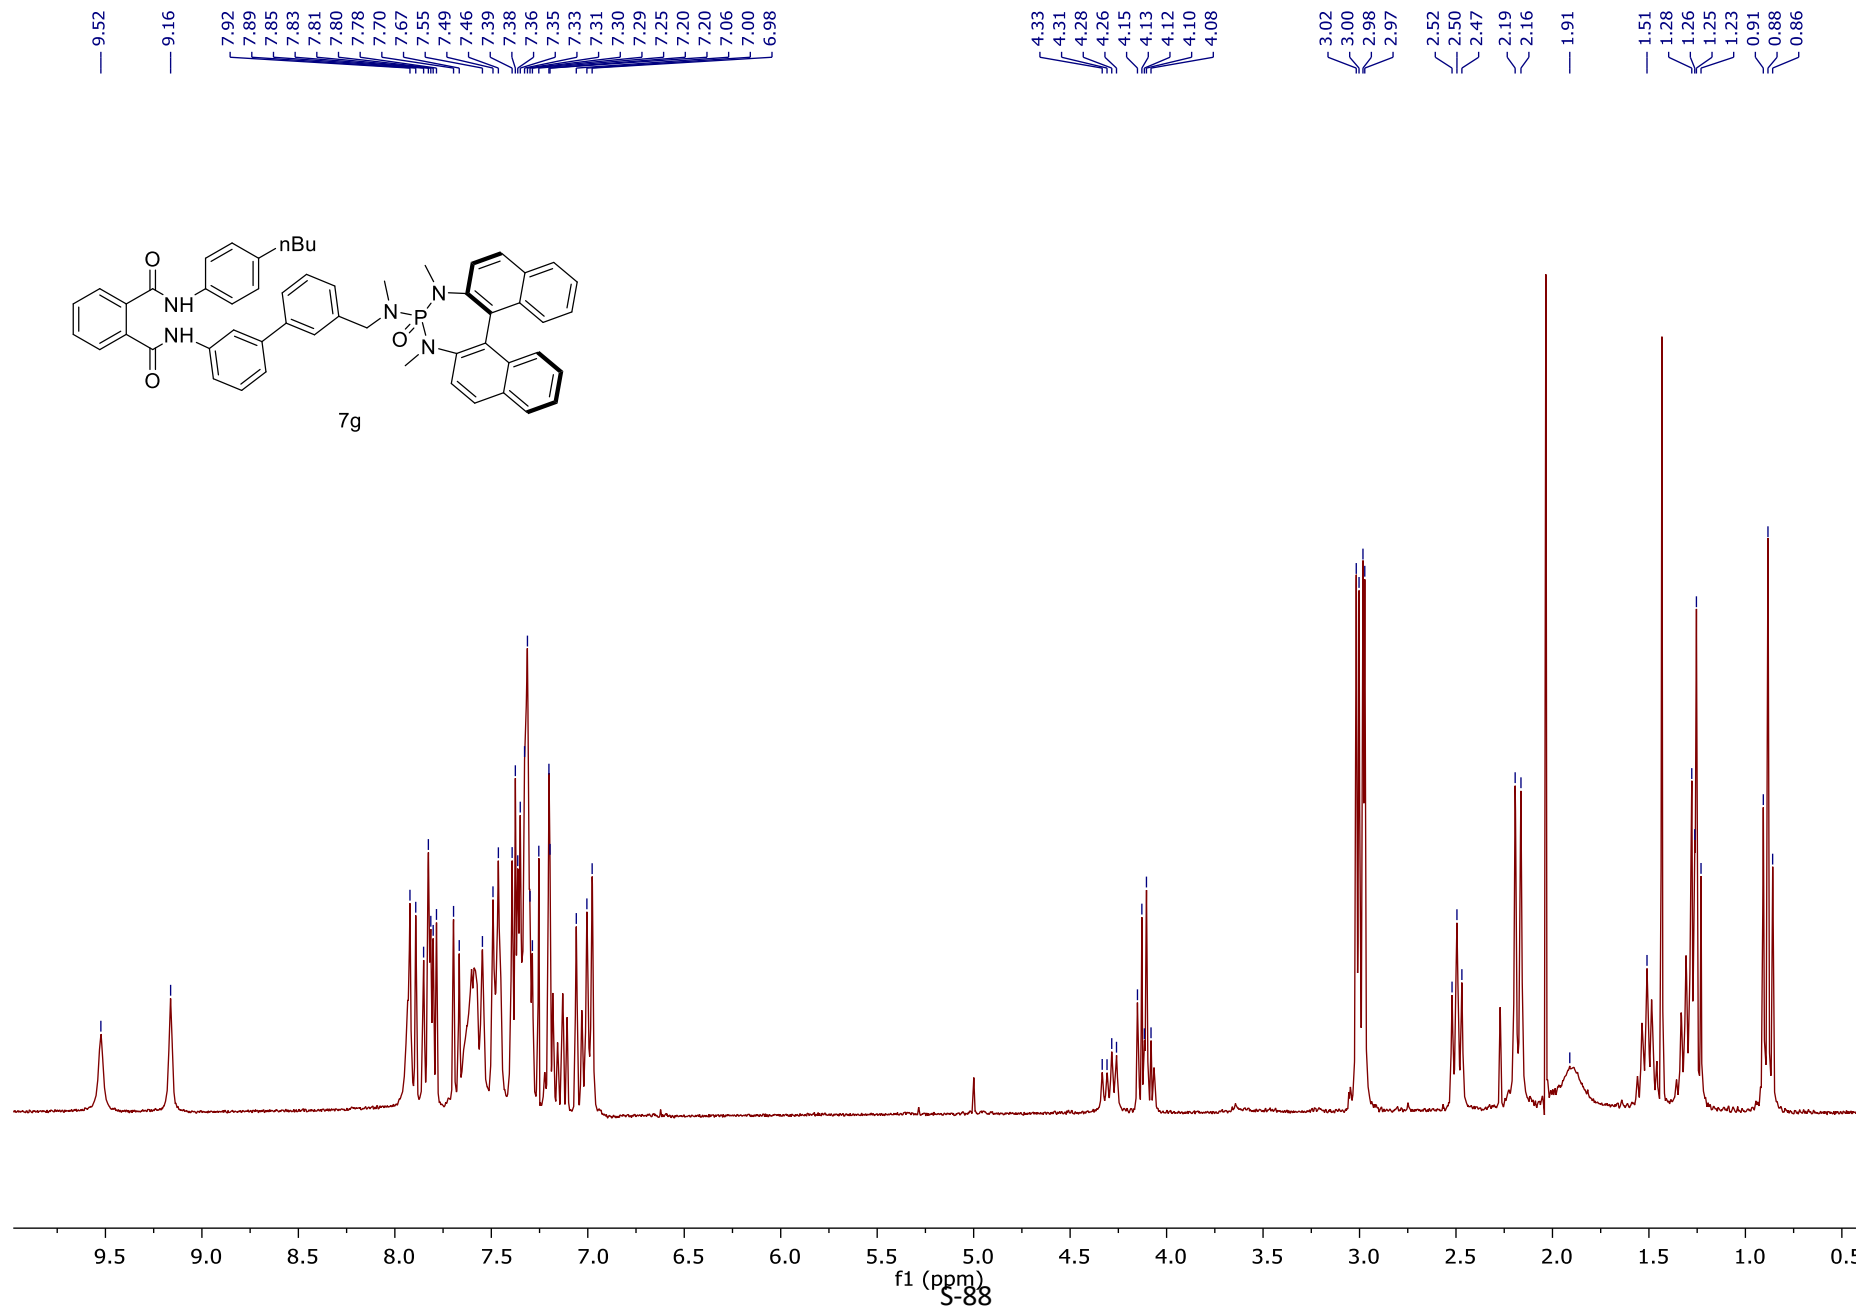

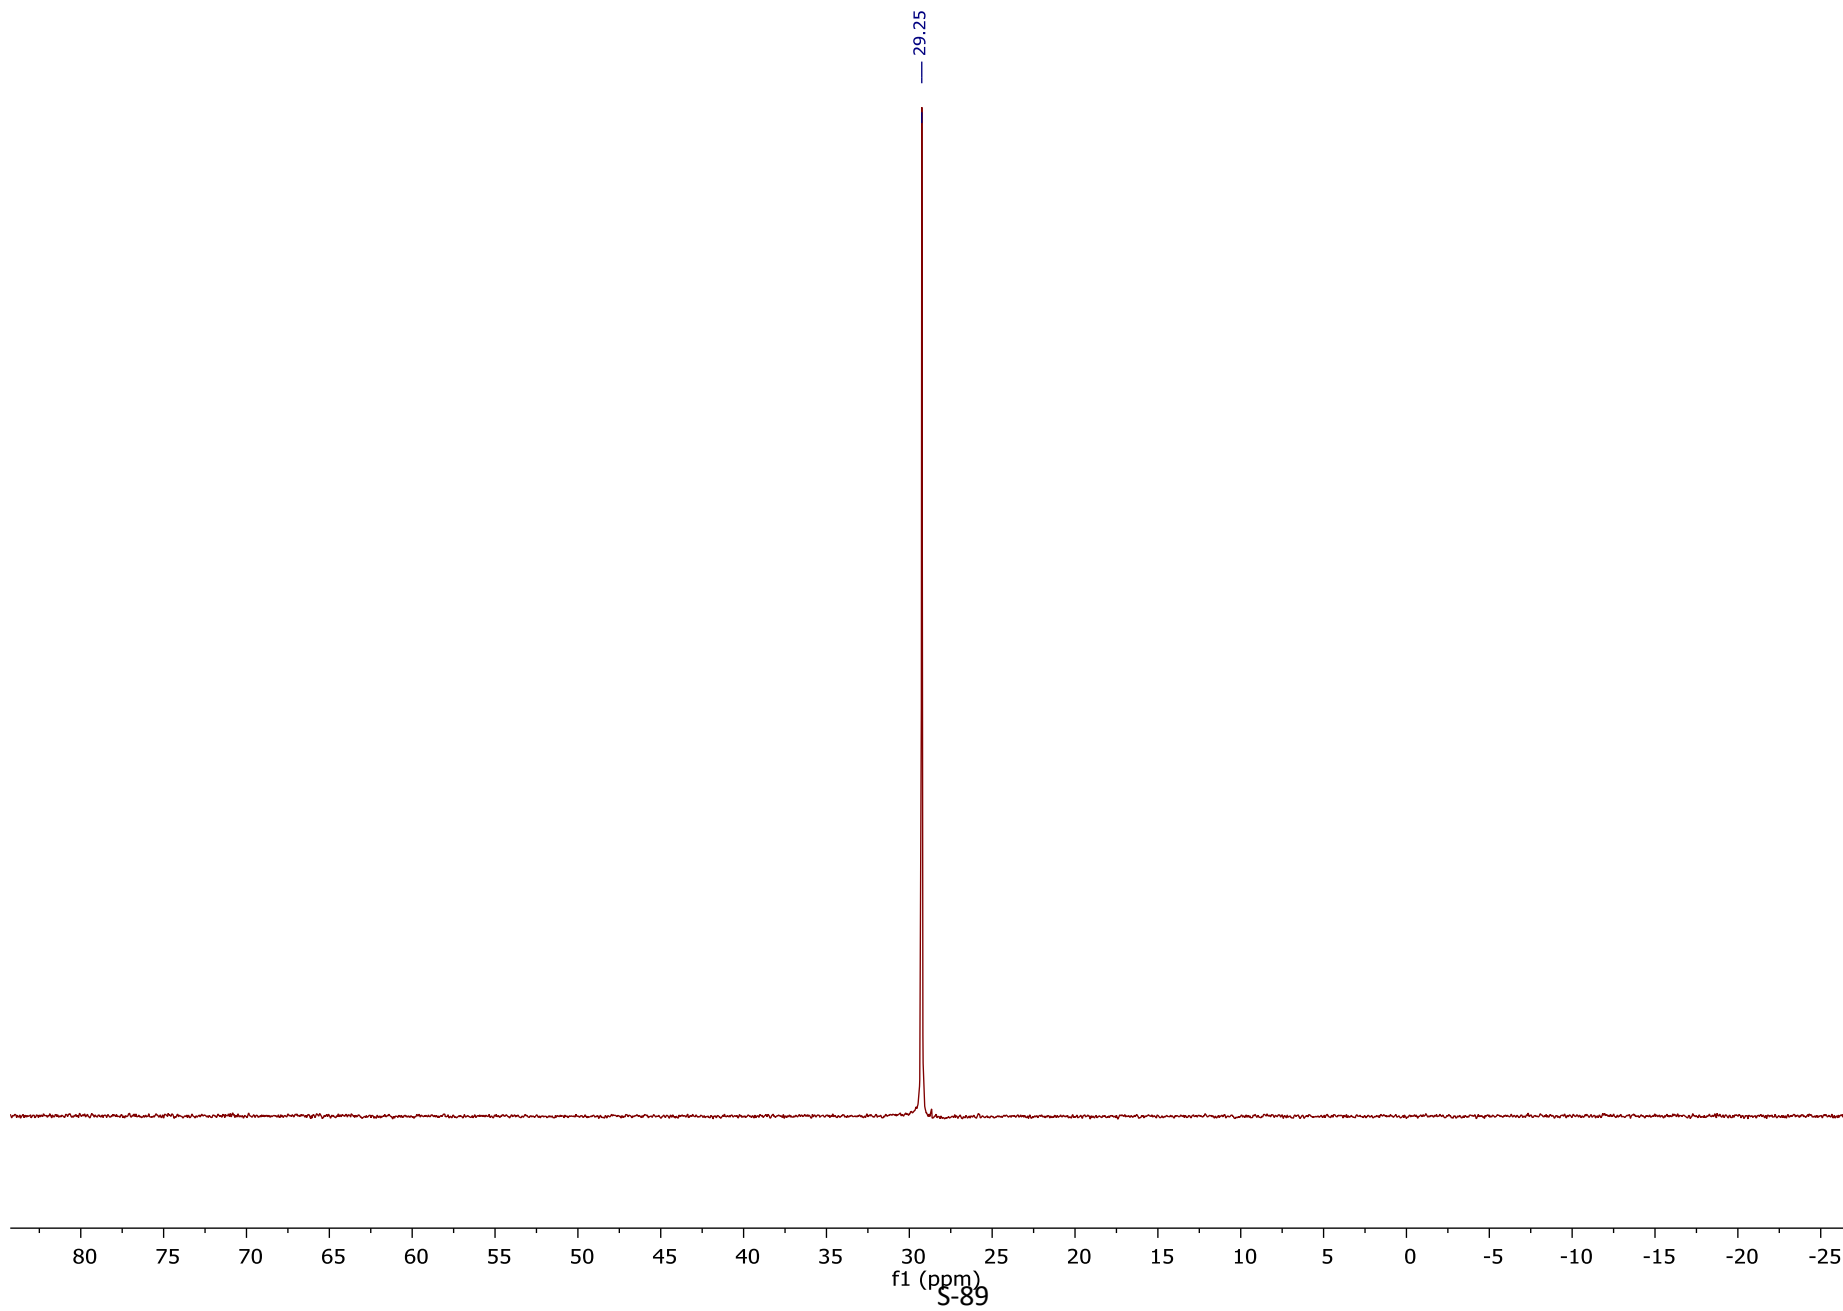

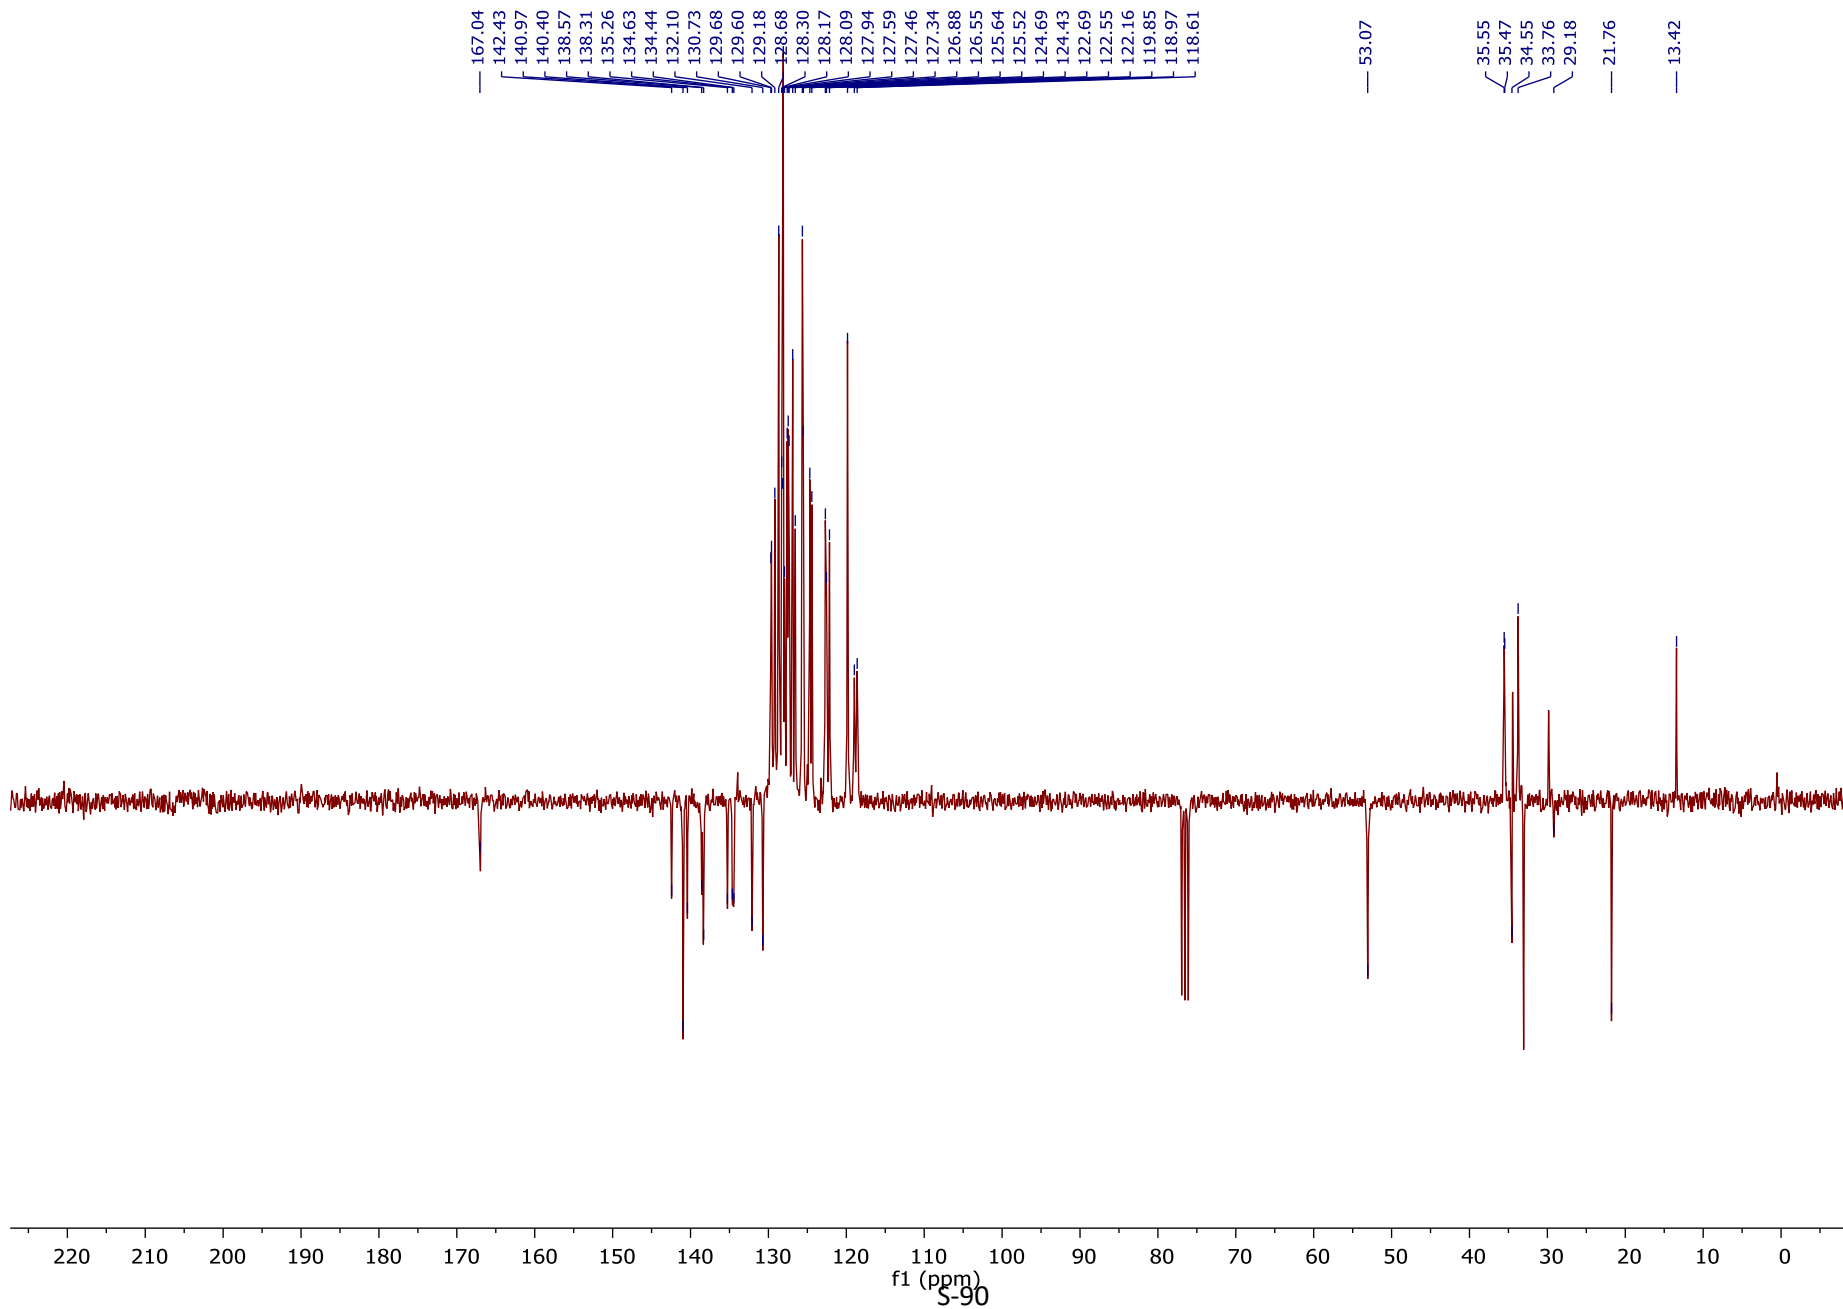

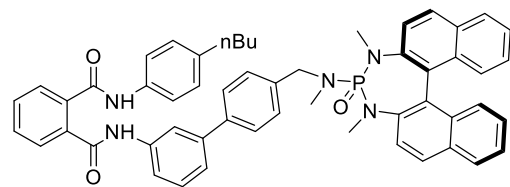

7h

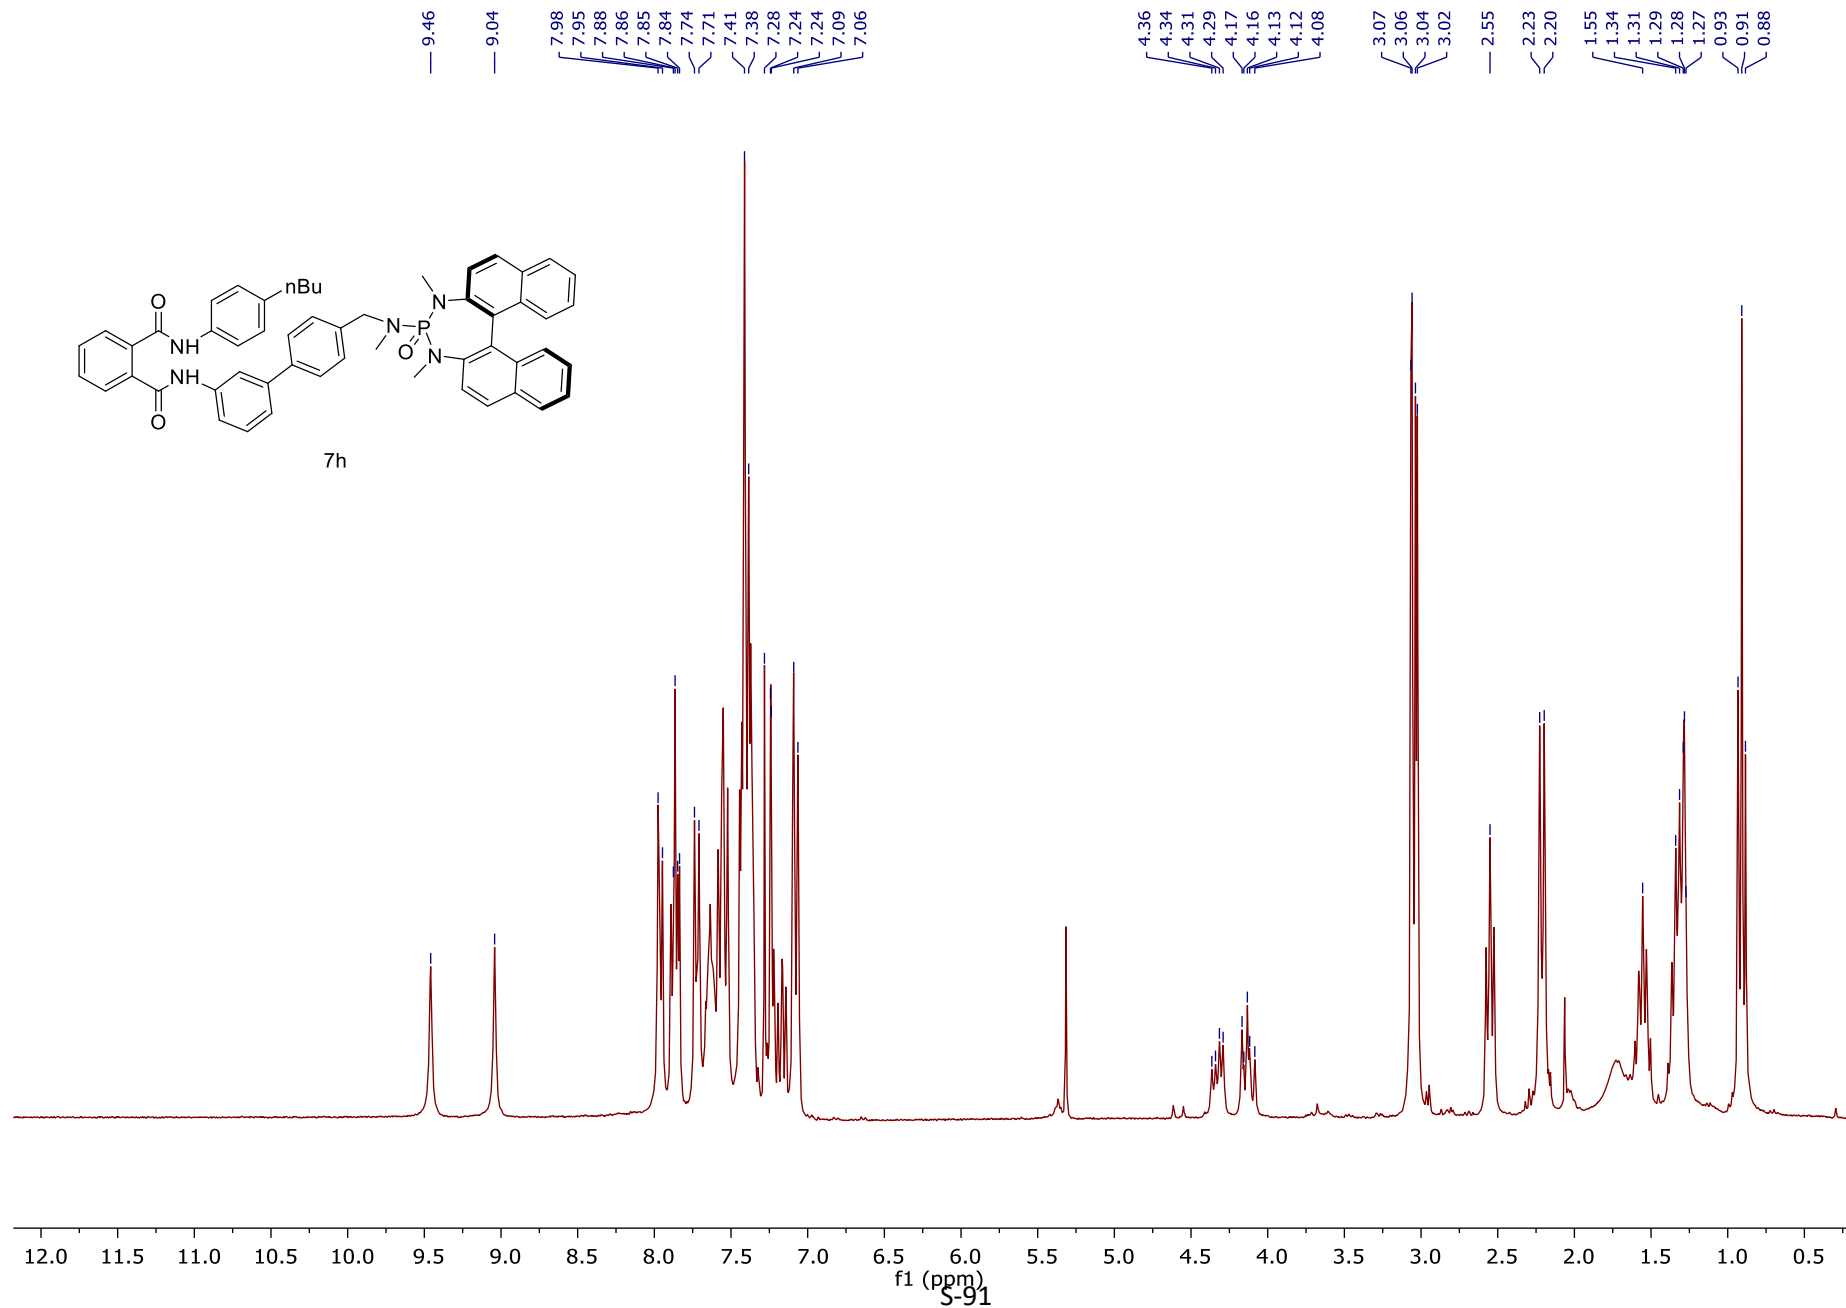

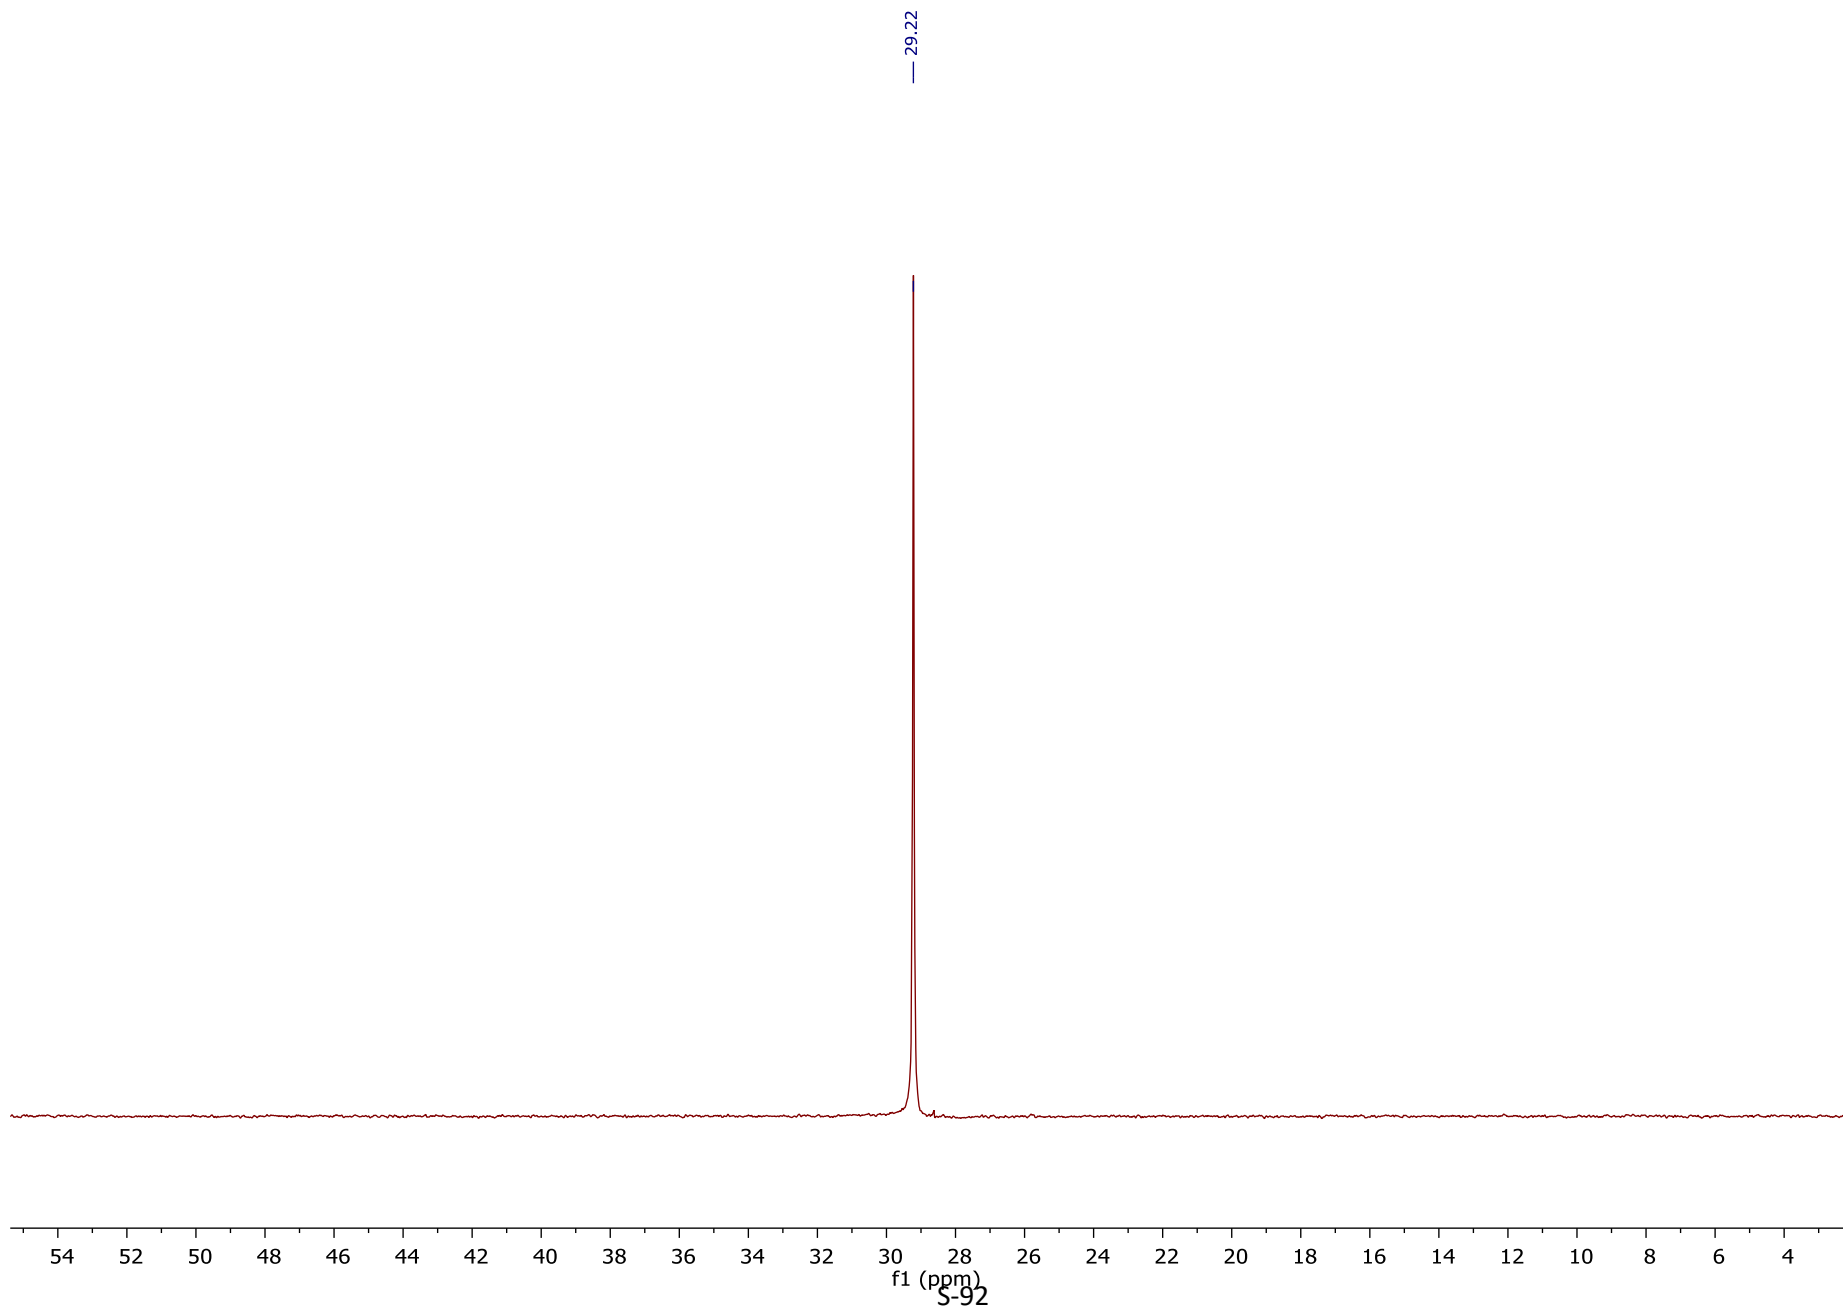

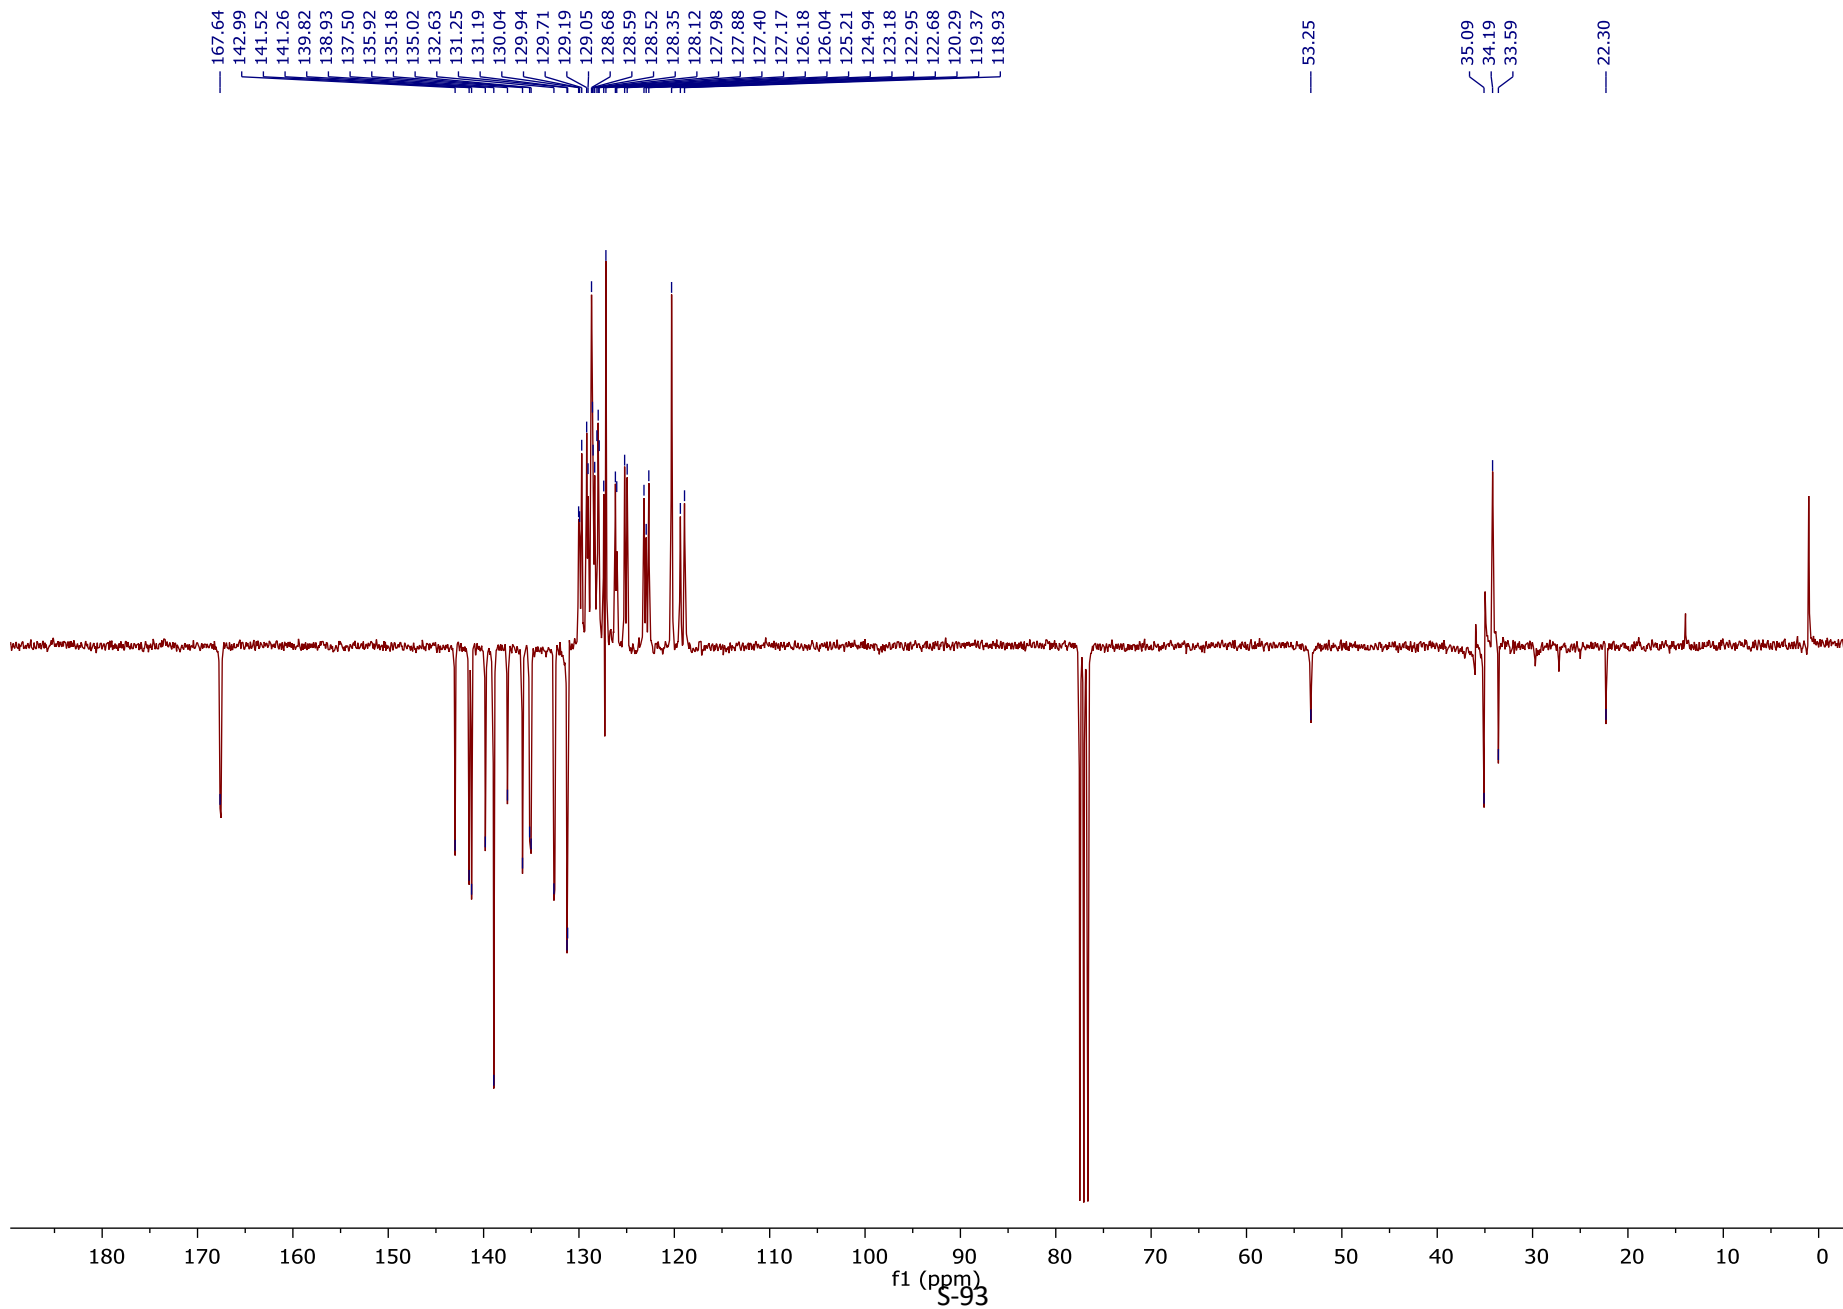

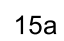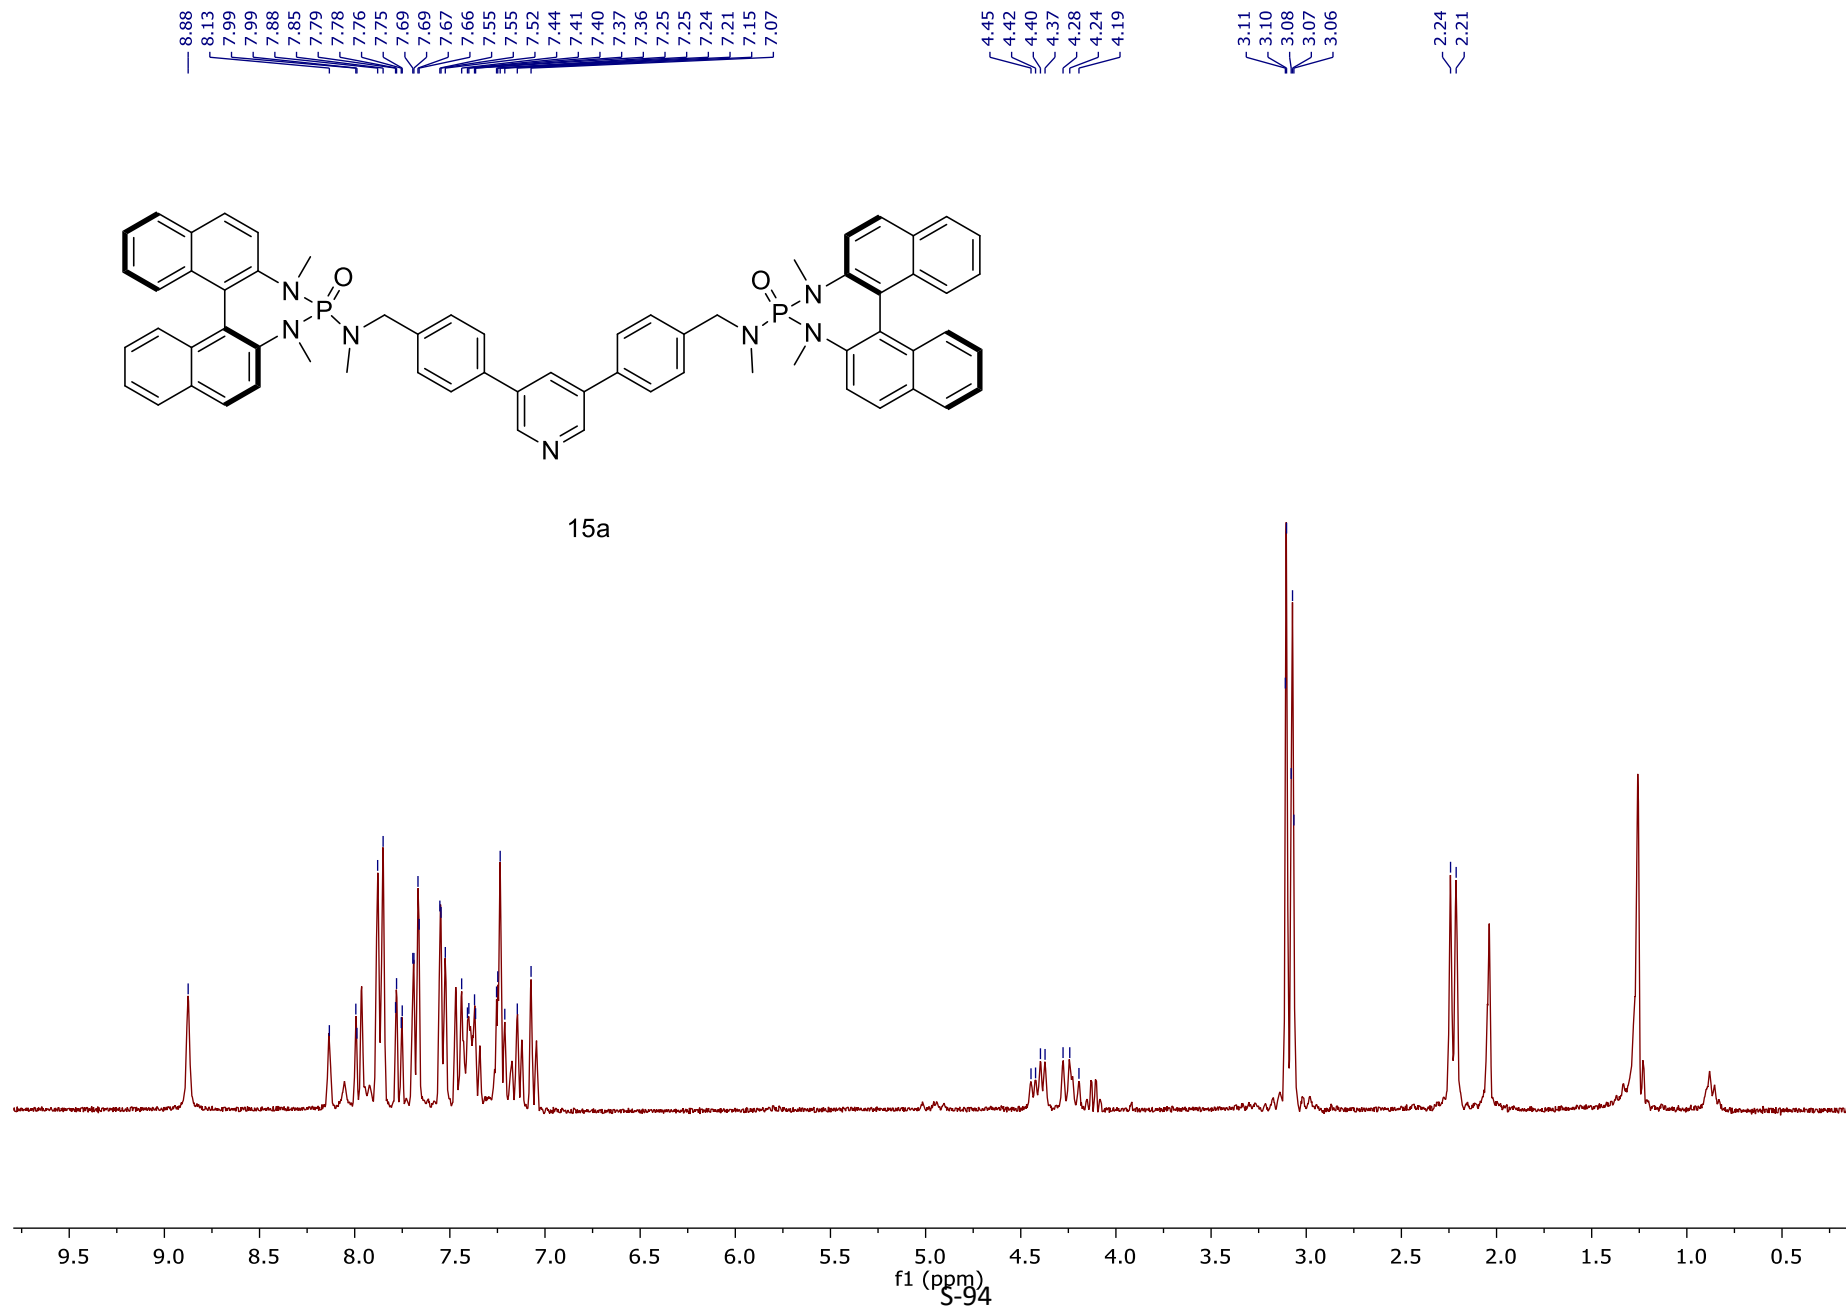

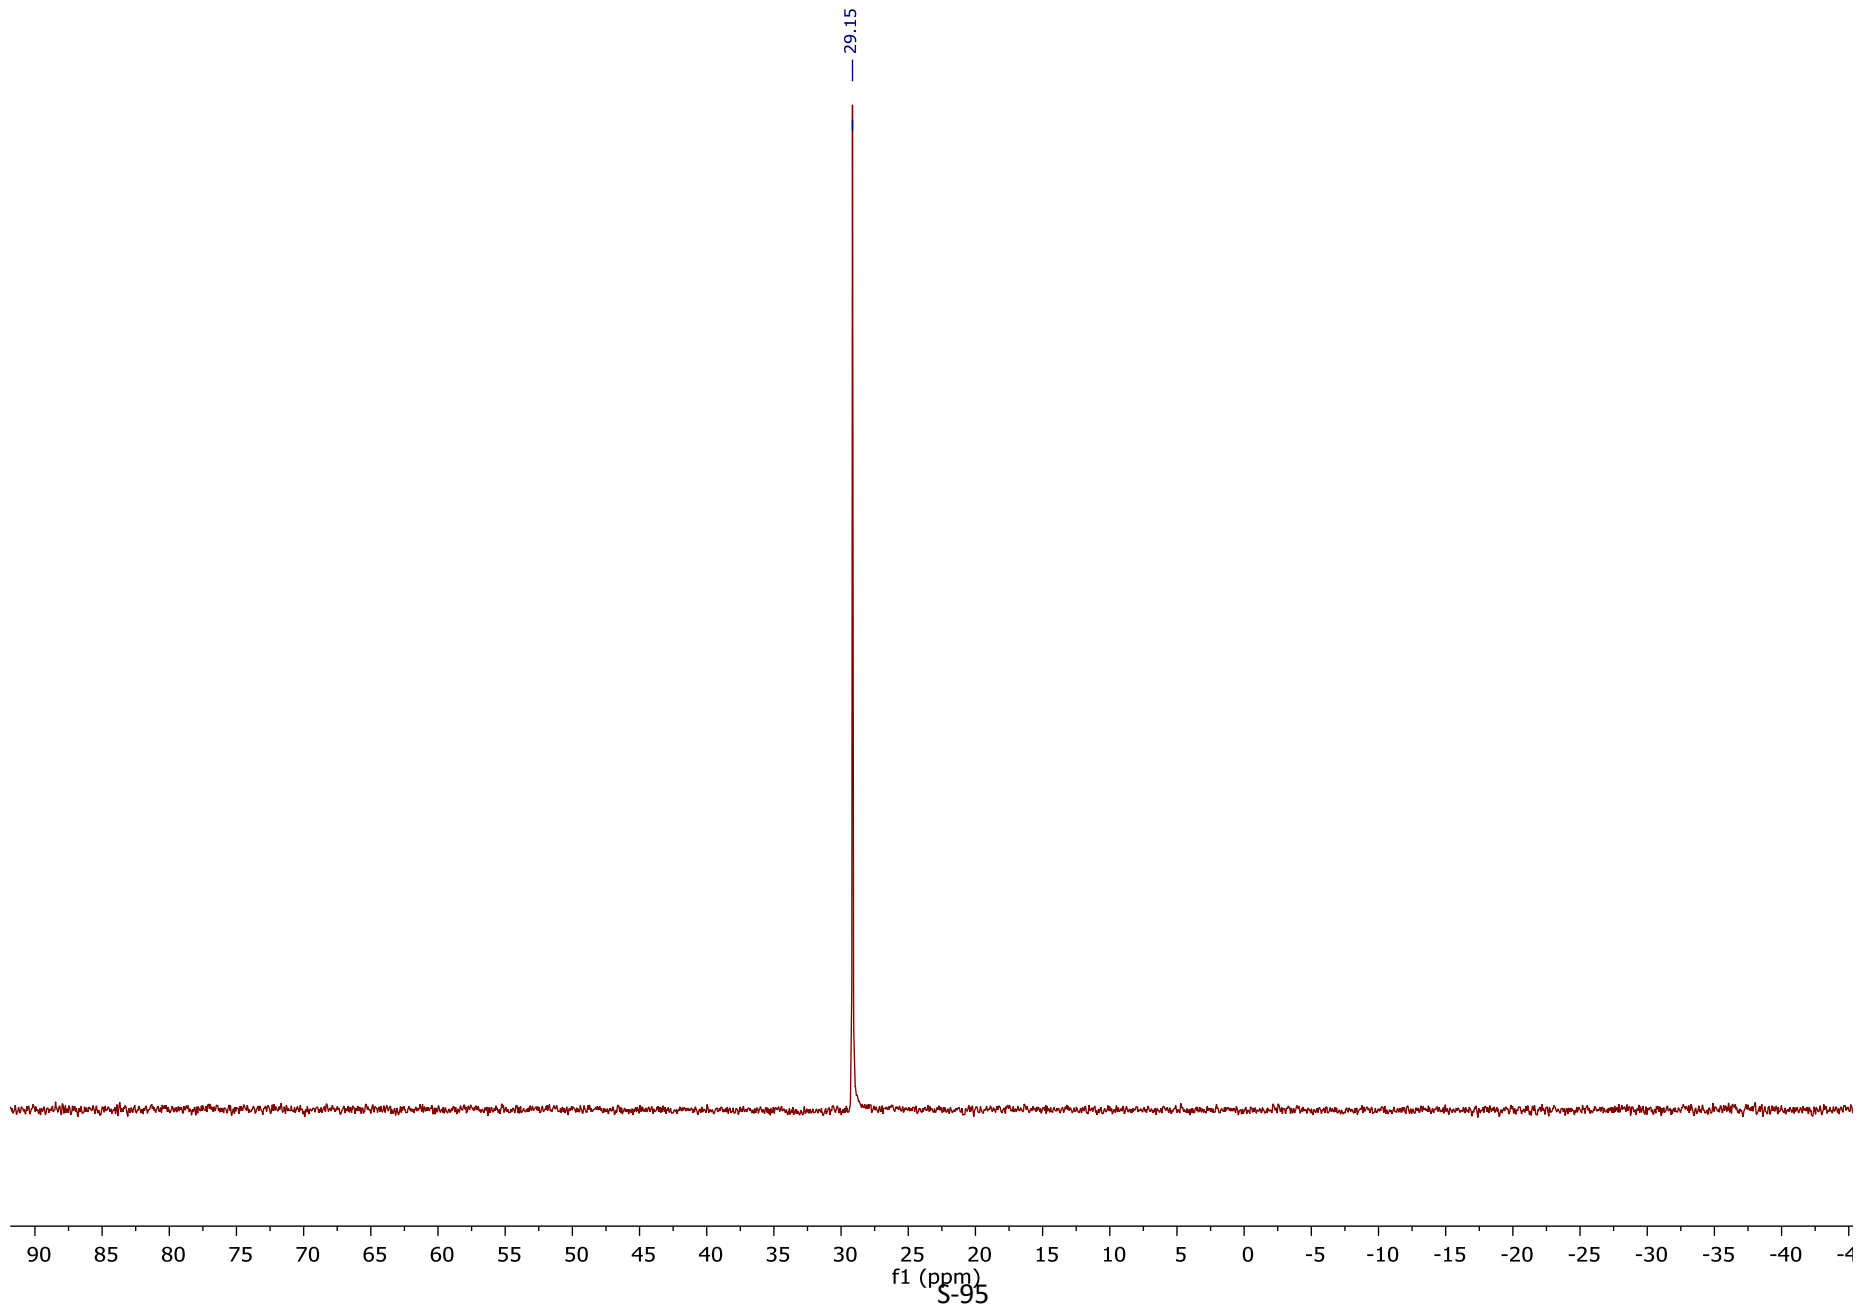

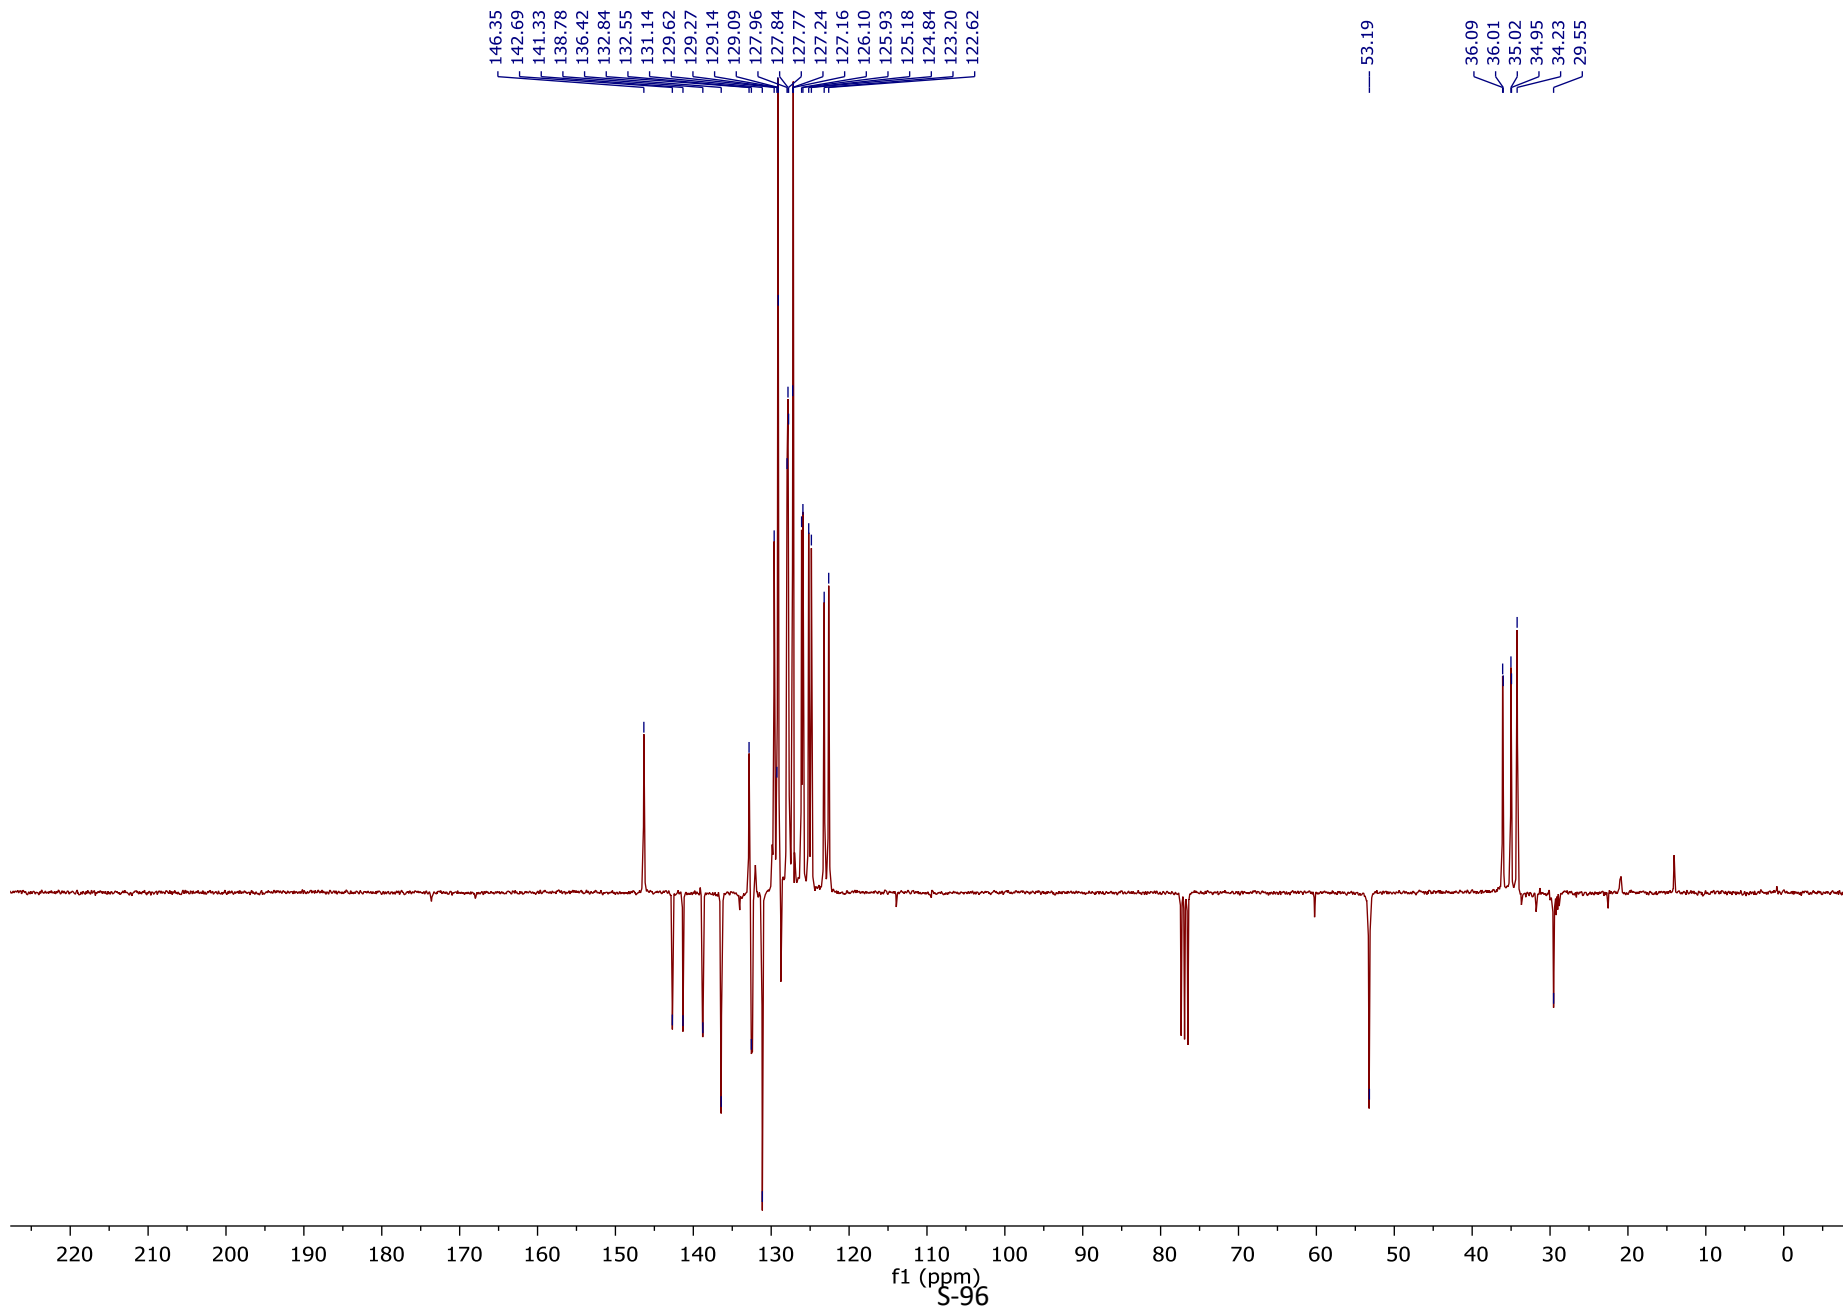

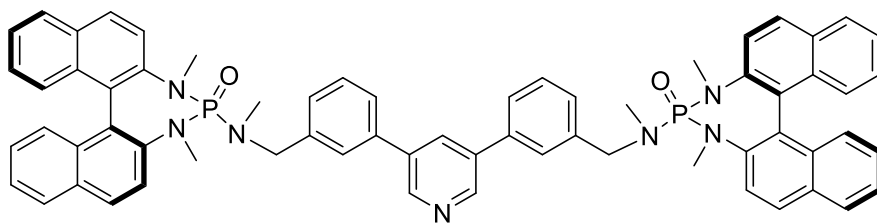

15b

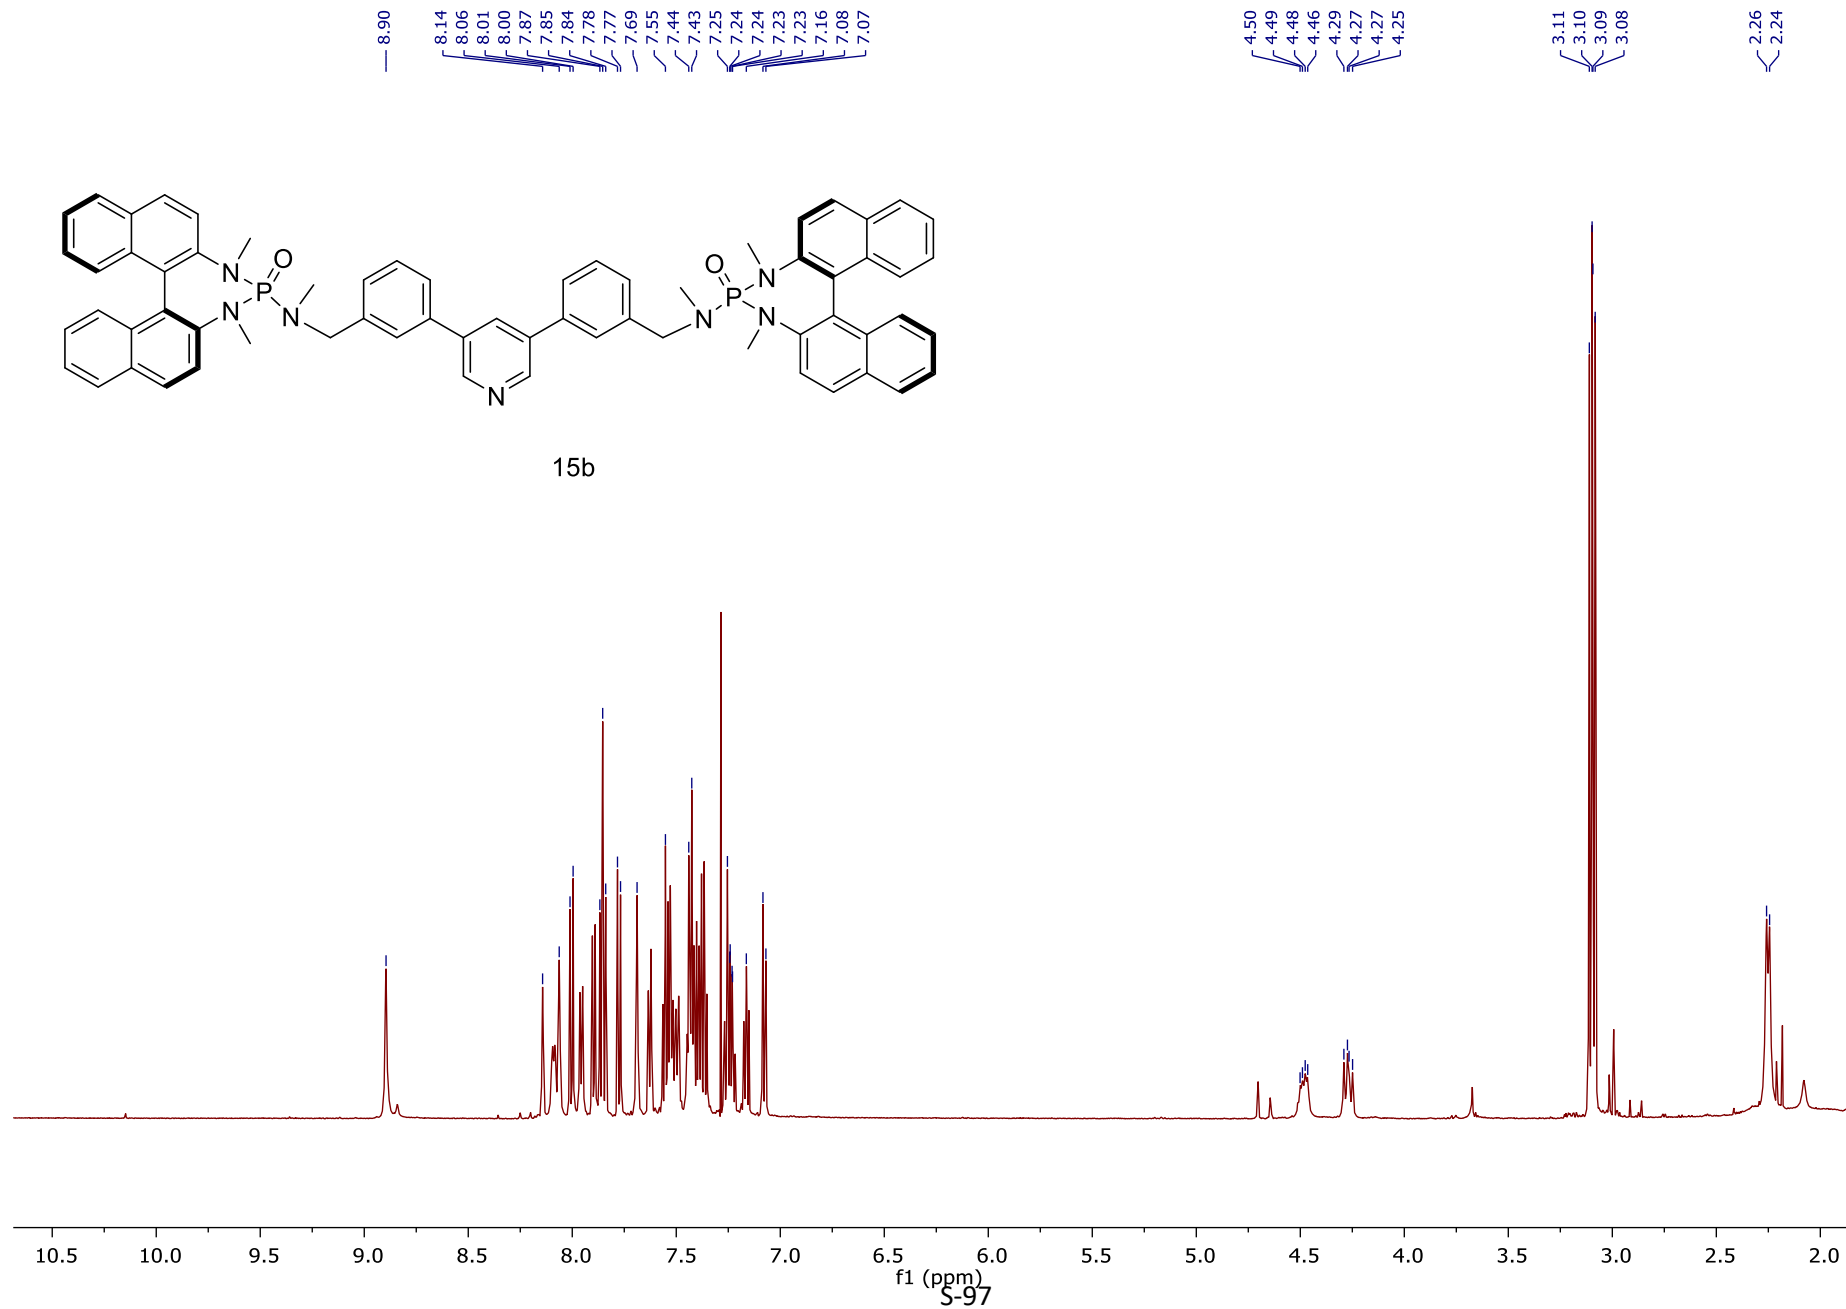

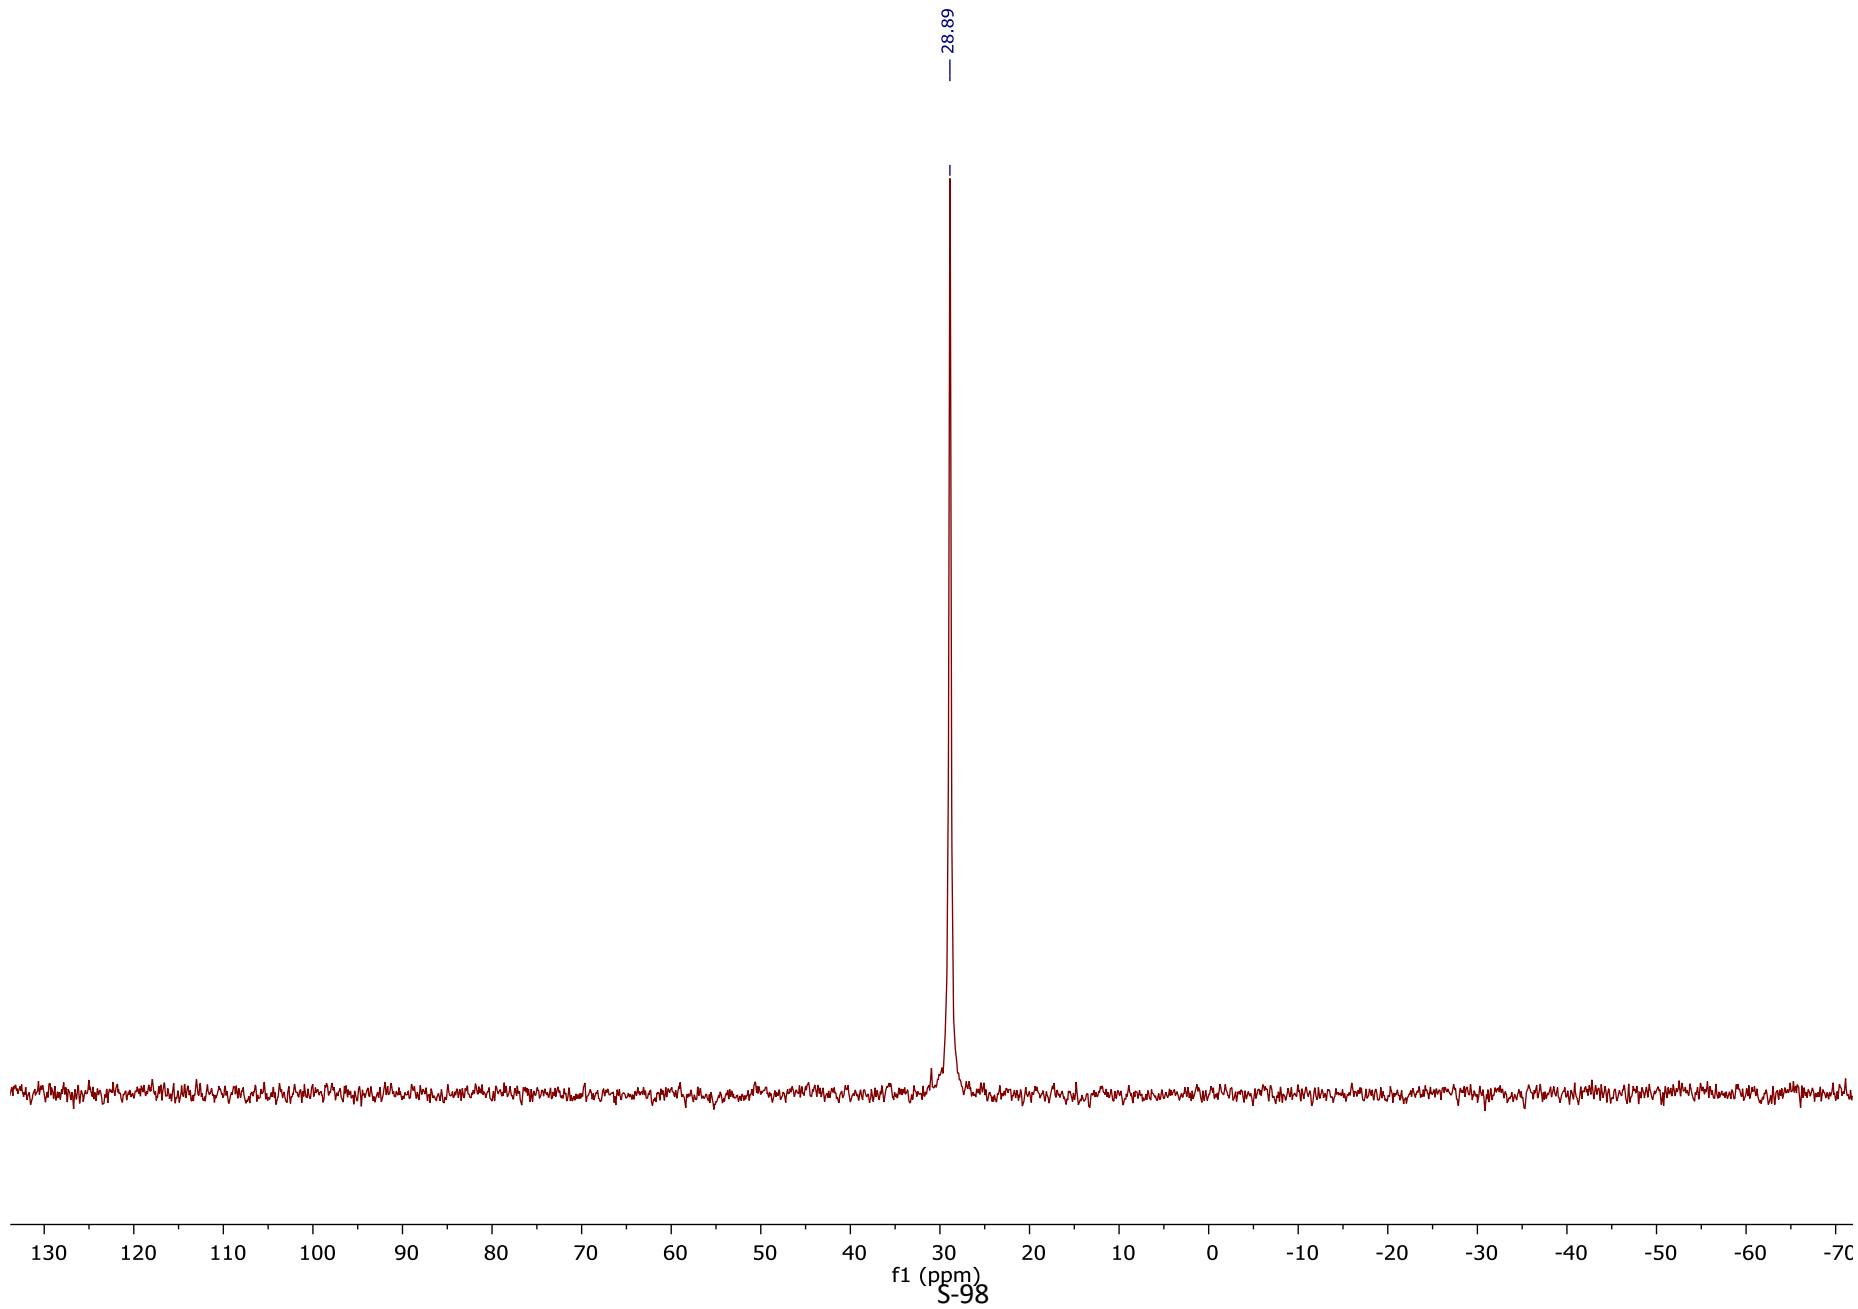

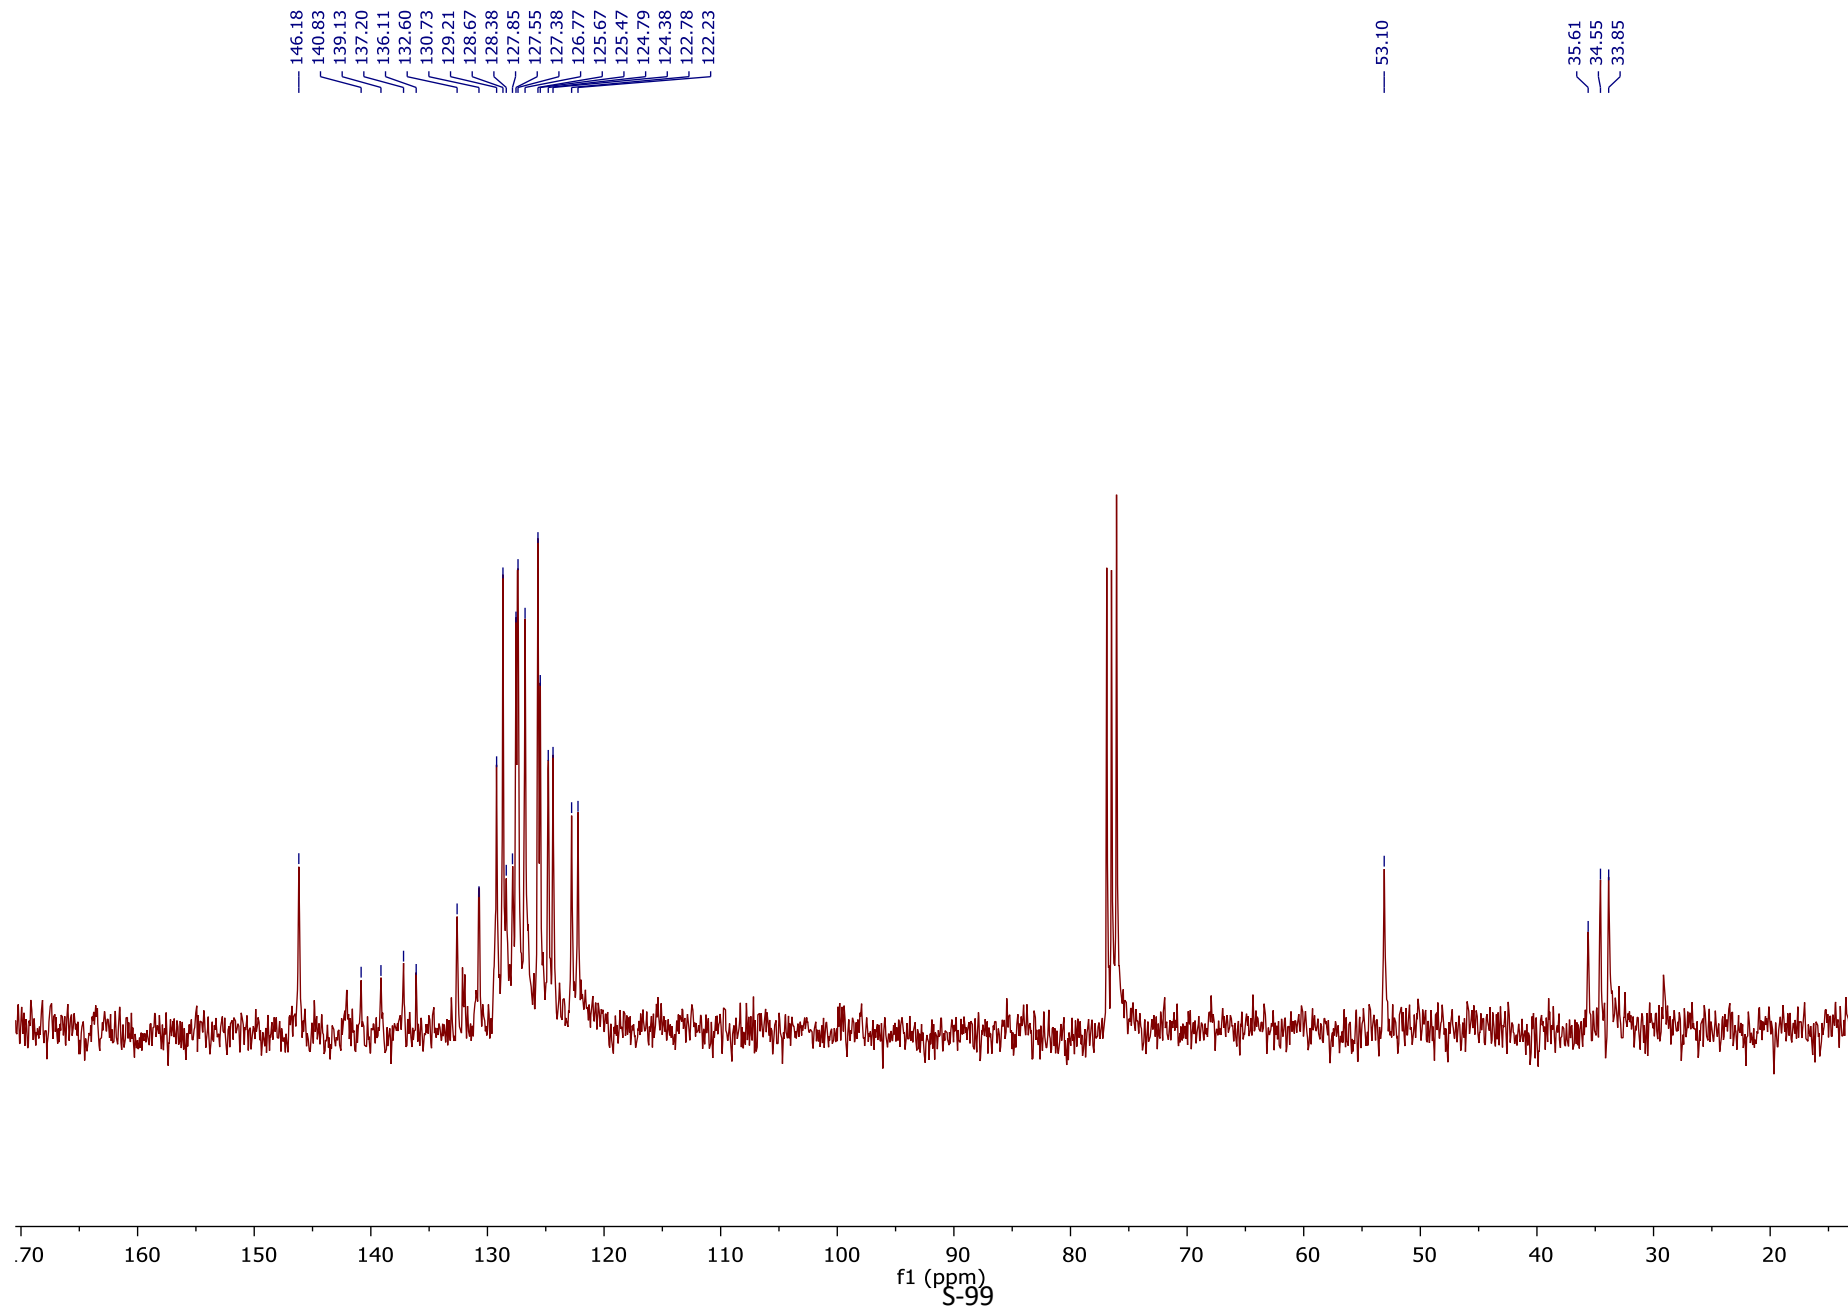

Supplement: Supplementary file 1 [file molecules-22-02181-s001.pdf]
